# Supplementary material for: Food additive β-caryophyllene mitigates alcoholic steatohepatitis by dual modulation of inflammation and lipid metabolism: a diet-based intervention strategy
Source: Royal Society of Chemistry journal article supplement (doi:10.1039/d5fo01083g), 2025-01-01
Supplement: d5fo01083g1.pdf [file d5fo01083g1.pdf]

Fig S1

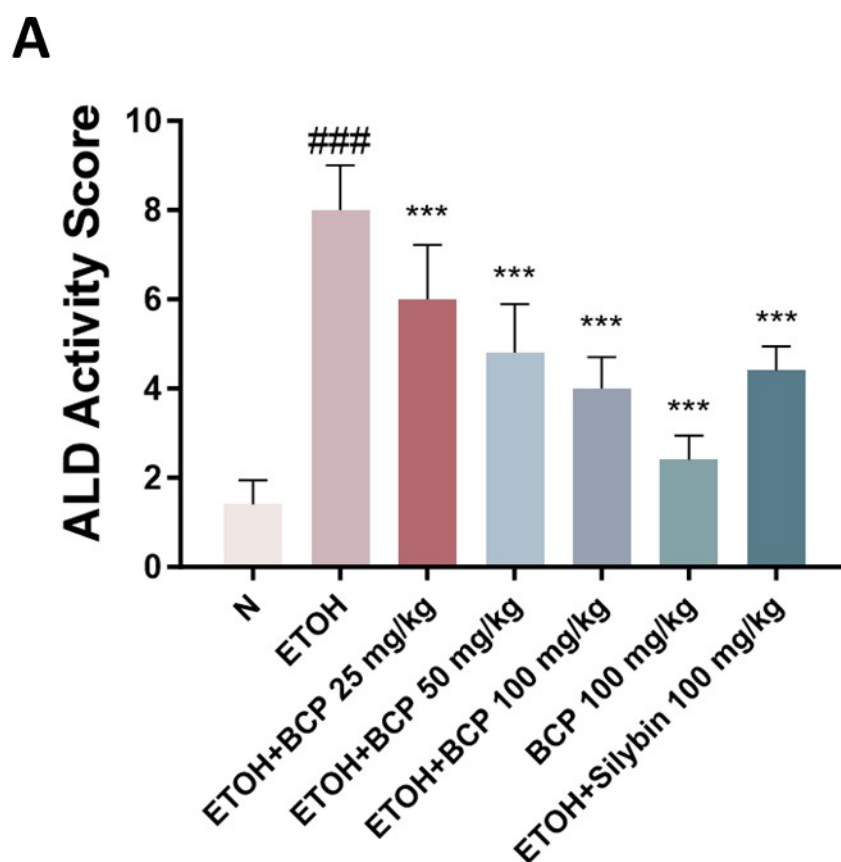

Figure S1. The ALD activity score of ASH mice. (A) The ALD activity score includes steatosis, lobular inflammation and hepatocyte ballooning. Scores of 0, 1, 2, 3, and 4 represented increasing levels of injury: none, few, slight, numerous and grievous (0%, <25%, 25–50%, 50–75% and >75% liver tissue involved, respectively). All data are shown as mean  $\pm$  SD,  $n = 5$ . ### $p < 0.001$  significantly different from Pair-fed group; \*\*\* $p < 0.001$  significantly different from ETOH group.
