# Supplementary material for: Food additive β-caryophyllene mitigates alcoholic steatohepatitis by dual modulation of inflammation and lipid metabolism: a diet-based intervention strategy
Source: Royal Society of Chemistry journal article supplement (doi:10.1039/d5fo01083g), 2025-01-01
Supplement: d5fo01083g2.xlsx [file d5fo01083g2.xlsx]

## Sheet: Pharmmapper
Ligand: BCP.sdf
Pharma Model	Num Feature	Fit	Norm Fit	zscore	Num Hydrophobic	Num HB Acceptor	Num HB Donor	Num Positive	Num Negative	Num Aromatic	Name	Class	Uniplot	Function	Disease	Idication
1xdd_v	3	2.997	0.9991	0.787536	3	0	0	0	0	0	Integrin alpha-L	IMMUNE SYSTEM	ITAL_HUMAN	Integrin alpha-L/beta-2 is a receptor for ICAM1, ICAM2, ICAM3 and ICAM4. It is involved in a variety of immune phenomena including leukocyte-endothelial cell interaction, cytotoxic T-cell mediated killing, and antibody dependent killing by granulocytes an	NONE	NONE
2pin_v	3	2.959	0.9865	0.593817	3	0	0	0	0	0	Thyroid hormone receptor beta	NONE	P10828	Nuclear hormone receptor that can act as a repressor or activator of transcription. High affinity receptor for thyroid hormones, including triiodothyronine and thyroxine.	NONE	NONE
2p3g_v	3	2.959	0.9863	0.626242	3	0	0	0	0	0	MAP kinase-activated protein kinase 2	NONE	P49137	Involved in protein kinase activity	NONE	NONE
1j96_v	3	2.952	0.9839	0.57825	3	0	0	0	0	0	Aldo-keto reductase family 1 member C2	OXIDOREDUCTASE	AK1C2_HUMAN	Works in concert with the 5-alpha/5-beta-steroid reductases to convert steroid hormones into the 3-alpha/5-alpha and 3-alpha/5-beta-tetrahydrosteroids. Catalyzes the inactivation of the most potent androgen 5-alpha-dihydrotestosterone (5-alpha- DHT) to 5-	NONE	NONE
1reu_v	3	2.946	0.9821	0.260425	3	0	0	0	0	0	Bone morphogenetic protein 2	HORMONE/GROWTH FACTOR	BMP2_HUMAN	Induces cartilage and bone formation.	NONE	Bone disease;Musculoskeletal disease;Periodontal disease;Bone injury;Osteoporosis
2pg2_v	3	2.942	0.9806	0.629098	3	0	0	0	0	0	Kinesin-like protein KIF11	MOTOR PROTEIN,CELL CYCLE	KIF11_HUMAN	Motor protein required for establishing a bipolar spindle. Blocking of KIF11 prevents centrosome migration and arrest cells in mitosis with monoastral microtubule arrays.	NONE	Melanoma;Hodgkins disease;Acute leukemia;Breast tumor;Head and neck tumor;Hepatocellular carcinoma;Ovary tumor;Prostate tumor;Solid tumor;Non-Hodgkin lymphoma;Cancer;Non-small-cell lung cancer;Renal cell carcinoma;Colorectal tumor
1shj_v	3	2.908	0.9694	0.442624	3	0	0	0	0	0	Caspase-7	HYDROLASE	CASP7_HUMAN	Involved in the activation cascade of caspases responsible for apoptosis execution. Cleaves and activates sterol regulatory element binding proteins (SREBPs). Proteolytically cleaves poly(ADP-ribose) polymerase (PARP) at a 216-Asp-	-Gly- 217 bond. Overe	NONE	NONE
2o65_v	3	2.849	0.9495	0.323068	3	0	0	0	0	0	Proto-oncogene serine/threonine-protein kinase Pim-1	TRANSFERASE	PIM1_HUMAN	Plays a role in signal transduction in blood cells. Contributes to both cell proliferation and survival and thus provide a selective advantage in tumorigenesis. May affect the structure or silencing of chromatin by phosphorylating HP1 gamma/CBX3.	NONE	Cancer
1p49_v	3	2.743	0.9145	-0.00463782	3	0	0	0	0	0	Steryl-sulfatase	HYDROLASE	STS_HUMAN	Conversion of sulfated steroid precursors to estrogens during pregnancy.	Defects in STS are the cause of ichthyosis X-linked (IXL) [MIM:308100]. Ichthyosis X-linked is a keratinization disorder manifesting with mild erythroderma and generalized exfoliation of the skin within a few weeks after birth. Affected boys later develop large, polygonal, dark brown scales, especially on the neck, extremities, trunk, and buttocks.	Cognitive disorder;Cancer;Breast tumor
1e7a_v	3	2.733	0.9111	0.208875	3	0	0	0	0	0	Serum albumin	CARRIER PROTEIN	ALBU_HUMAN	Serum albumin, the main protein of plasma, has a good binding capacity for water, Ca(2+), Na(+), K(+), fatty acids, hormones, bilirubin and drugs. Its main function is the regulation of the colloidal osmotic pressure of blood.	Defects in ALB are a cause of familial dysalbuminemic hyperthyroxinemia (FDH) [MIM:103600]. FDH is a form of euthyroid hyperthyroxinemia that is due to increased affinity of ALB for T(4). It is the most common cause of inherited euthyroid hyperthyroxinemia in Caucasian population.;A variant structure of albumin could lead to increased binding of zinc resulting in an asymptomatic augmentation of z…	NONE
1l6l_v	3	2.681	0.8936	-0.109518	3	0	0	0	0	0	Apolipoprotein A-II	LIPID TRANSPORT	APOA2_HUMAN	May stabilize HDL (high density lipoprotein) structure by its association with lipids, and affect the HDL metabolism.	NONE	NONE
1j78_v	4	2.997	0.7491	-0.201593	4	0	0	0	0	0	Vitamin D-binding protein	TRANSPORT, LIGAND BINDING PROTEIN	VTDB_HUMAN	Multifunctional protein found in plasma, ascitic fluid, cerebrospinal fluid, and urine and on the surface of many cell types. In plasma, it carries the vitamin D sterols and prevents polymerization of actin by binding its monomers. DBP associates with mem	NONE	NONE
2qd9_v	4	2.989	0.7473	0.67764	3	1	0	0	0	0	Mitogen-activated protein kinase 14	NONE	Q16539	Involved in MAP kinase activity	NONE	NONE
1a28_v	4	2.988	0.747	0.242822	3	1	0	0	0	0	Progesterone receptor	PROGESTERONE RECEPTOR	PRGR_HUMAN	The steroid hormones and their receptors are involved in the regulation of eukaryotic gene expression and affect cellular proliferation and differentiation in target tissues.	NONE	Uterine fibroids;Menstruation disorder;Infertility;Acne;Breast tumor;Female contraception;Neoplasm;Planned abortion;Dysmenorrhea;Endometriosis;Hormone deficiency;Unidentified indication;Gynecological disorder;Musculoskeletal disease;Estrogen deficiency;Cancer;Contraception;Amenorrhea;Female infertility;Carcinoma;Menopause;Premenstrual syndrome;Anesthesia;Age related macular degeneration;Osteoporo…
3b92_v	4	2.986	0.7464	0.535907	3	1	0	0	0	0	ADAM 17	HYDROLASE	ADA17_HUMAN	Cleaves the membrane-bound precursor of TNF-alpha to its mature soluble form. Responsible for the proteolytic release of several other cell-surface proteins, including p75 TNF-receptor, interleukin 1 receptor type II, p55 TNF-receptor, transforming growth	NONE	Psoriasis;Inflammation;Rheumatoid arthritis;Cardiac failure;Multiple sclerosis;Metastasis;Immune disorder
1fdu_v	4	2.98	0.7451	0.572617	3	0	1	0	0	0	Estradiol 17-beta-dehydrogenase 1	NONE	P14061	Lipid transport and metabolism	NONE	Some evidence suggests that NADH might be useful in treating Parkinsons disease, chronic fatigue syndrome, Alzheimers disease and cardiovascular disease.
1ya3_v	4	2.977	0.7442	0.630772	3	1	0	0	0	0	Mineralocorticoid receptor	TRANSCRIPTION	MCR_HUMAN	Receptor for both mineralocorticoids (MC) such as aldosterone and glucocorticoids (GC) such as corticosterone or cortisol. Binds to mineralocorticoid response elements (MRE) and transactivates target genes. The effect of MC is to increase ion and water tr	Defects in NR3C2 are a cause of autosomal dominant pseudohypoaldosteronism type I (PHA1) [MIM:177735]. PHA1 is characterized by urinary salt wasting, resulting from target organ unresponsiveness to mineralocorticoids. There are 2 forms of PHA1: the autosomal dominant form that is mild, and the recessive form which is more severe and due to defects in any of the epithelial sodium channel subunits.…	Metabolic disorder;Hypertension;Cardiovascular disease;Urinary tract disease
2zas_v	4	2.971	0.7427	0.481571	3	1	0	0	0	0	Estrogen-related receptor gamma	NONE	P62508	Orphan receptor that acts as transcription activator in the absence of bound ligand. Binds specifically to an estrogen response element and activates reporter genes controlled by estrogen response elements (By similarity). Induces the expression of PERM1 in the skeletal muscle.	NONE	NONE
1j99_v	4	2.966	0.7415	0.531187	3	0	1	0	0	0	Bile salt sulfotransferase	NONE	Q06520	Involved in sulfotransferase activity	NONE	NONE
2ity_v	4	2.966	0.7414	0.647009	3	1	0	0	0	0	Epidermal growth factor receptor	TRANSFERASE	EGFR_HUMAN	Receptor for EGF, but also for other members of the EGF family, as TGF-alpha, amphiregulin, betacellulin, heparin-binding EGF-like growth factor, GP30 and vaccinia virus growth factor. Is involved in the control of cell growth and differentiation. Phospho;Isoform 2/truncated isoform may act as an antagonist.	Defects in EGFR are associated with lung cancer [MIM:211980].	Squamous cell carcinoma;Arteriosclerosis;Melanoma;Central nervous system tumor;Diabetes mellitus;Esophagus tumor;Ischemic heart disease;Brain tumor;Nasopharyngeal carcinoma;Liver tumor;Pancreas tumor;Lung tumor;Psoriasis;Bladder tumor;Esophageal disease;Mesothelioma;Atherosclerosis;Multiple myeloma;Bacterial infection;Uterine cervix tumor;Nasopharynx tumor;Carcinoma;Restenosis;Stomach tumor;Thyro…
2is7_v	4	2.963	0.7407	0.651527	3	0	0	0	1	0	Aldose reductase	OXIDOREDUCTASE	ALDR_HUMAN	Catalyzes the NADPH-dependent reduction of a wide variety of carbonyl-containing compounds to their corresponding alcohols with a broad range of catalytic efficiencies.	In diabetes and galactosemia, increased AR activity leads to high levels of sorbitol and galactitol, respectively, in the cells of many tissues. Accumulation of sugar alcohols has been shown to cause osmotic cataracts in the lens. AR is also thought to play a key role in diabetic complications of three other target tissues, namely, nerve, kidney and retina.	Neuropathy;Diabetic neuropathy;Diabetic foot ulcer;Diabetic complication;Diabetic nephropathy;Retinopathy;Ocular disease;Central nervous system disease;Diabetic retinopathy;Diabetes mellitus;Diabetic cataract;Cataract
2ao6_v	4	2.959	0.7397	0.543254	3	1	0	0	0	0	Androgen receptor	TRANSCRIPTION	ANDR_HUMAN	Steroid hormone receptors are ligand-activated transcription factors that regulate eukaryotic gene expression and affect cellular proliferation and differentiation in target tissues. Transcription factor activity is modulated by bound coactivator and core	Genetic variation in AR can be responsible of androgenetic alopecia (AGA) [MIM:109200].;Defects in AR are the cause of androgen insensibility syndrome (AIS) [MIM:300068]; previously known as testicular feminization syndrome (TFM). It can be complete (CAIS) when external genitalia are phenotypically female; or partial (PAIS) when external genitalia are substantively ambiguous or mild (MAIS) when e…	Hypoactive sexual desire disorder;Hepatitis B virus infection;Cardiac failure;Andrology;Hirsutism;Female sexual dysfunction;Psoriasis;Reperfusion injury;Plasmodium infection;Atherosclerosis;Prostate hyperplasia;Fatigue;Male sexual dysfunction;Autoimmune disease;Testosterone deficiency;Uterine fibroids;Metabolic disorder;Myalgia;Obesity;Gynecological disorder;Contraception;Cancer;Hypercholesterole…
1n7i_v	4	2.948	0.737	0.439697	3	0	0	1	0	0	Phenylethanolamine N-methyltransferase	TRANSFERASE	PNMT_HUMAN	Converts noradrenaline to adrenaline.	NONE	NONE
1oiz_v	5	3.681	0.7362	2.07203	4	1	0	0	0	0	Alpha-tocopherol transfer protein	NONE	P49638	Involved in vitamin E transporter activity	NONE	Vitamin E, known for its antioxidant activities, is protective against cardiovascular disease and some forms of cancer and has also demonstrated immune-enhancing effects. It may be of limited benefit in some with asthma and rheumatoid arthritis. It may be helpful in some neurological diseases including Alzheimers, some eye disorders including cataracts, and diabetes and premenstrual syndrome. It …
1p0p_v	4	2.935	0.7339	0.508823	3	0	0	1	0	0	Cholinesterase	HYDROLASE	CHLE_HUMAN	NONE	Defects in BCHE are the cause of butyrylcholinesterase deficiency (BChE deficiency) [MIM:177400]. BChE deficiency is a metabolic disorder characterized by prolonged apnoea after the use of certain anesthetic drugs, including the muscle relaxants succinylcholine or mivacurium and other ester local anesthetics. The duration of the prolonged apnoea varies significantly depending on the extent of the…	Neurotoxicity, drug-induced;Toxicity;Alzheimers disease
2vww_v	4	2.919	0.7297	0.501391	3	0	1	0	0	0	Ephrin type-B receptor 4	TRANSFERASE	EPHB4_HUMAN	Receptor for members of the ephrin-B family. Binds to ephrin-B2. May have a role in events mediating differentiation and development.	NONE	Ocular disease;Rheumatoid arthritis;Cancer
1tt6_v	4	2.916	0.7291	0.227146	4	0	0	0	0	0	Transthyretin	TRANSPORT PROTEIN	TTHY_HUMAN	Thyroid hormone-binding protein. Probably transports thyroxine from the bloodstream to the brain.	Defects in TTR are the cause of amyloidosis type 1 (AMYL1) [MIM:176300]. AMYL1 is a hereditary generalized amyloidosis due to transthyretin amyloid deposition. Protein fibrils can form in different tissues leading to amyloid polyneuropathies, amyloidotic cardiomyopathy, carpal tunnel syndrome, systemic senile amyloidosis.;Defects in TTR are the cause of amyloidosis type 7 (AMYL7) [MIM:105210]; al…	NONE
1pme_v	3	2.186	0.7287	-1.64257	3	0	0	0	0	0	Mitogen-activated protein kinase 1	TRANSFERASE	MK01_HUMAN	Involved in both the initiation and regulation of meiosis, mitosis, and postmitotic functions in differentiated cells by phosphorylating a number of transcription factors such as ELK1. Phosphorylates EIF4EBP1; required for initiation of translation. Phosp	NONE	NONE
1b6a_v	4	2.903	0.7257	0.616969	3	0	1	0	0	0	Methionine aminopeptidase 2	ANGIOGENESIS INHIBITOR	AMPM2_HUMAN	Removes the amino-terminal methionine from nascent proteins.	NONE	NONE
3f5p_v	4	2.877	0.7193	0.414735	3	1	0	0	0	0	Insulin-like growth factor 1 receptor	NONE	P08069	Involved in transmembrane receptor protein tyrosine kinase activity	NONE	For treatment of diabetes (type I and II)
1s95_v	4	2.876	0.7191	0.305608	3	0	1	0	0	0	Serine/threonine-protein phosphatase 5	NONE	P53041	Involved in hydrolase activity	NONE	NONE
1xq0_v	4	2.864	0.716	0.247803	3	0	0	0	1	0	Carbonic anhydrase 2	LYASE	CAH2_HUMAN	Essential for bone resorption and osteoclast differentiation (By similarity). Reversible hydration of carbon dioxide.	Defects in CA2 are the cause of autosomal recessive osteopetrosis type 3 (OPTB3) [MIM:259730]; also known as osteopetrosis with renal tubular acidosis, carbonic anhydrase II deficiency syndrome, Guibaud-Vainsel syndrome or marble brain disease. Osteopetrosis is a rare genetic disease characterized by abnormally dense bone, due to defective resorption of immature bone. The disorder occurs in two f…	NONE
1mkp_v	4	2.849	0.7124	0.290242	3	0	1	0	0	0	Dual specificity protein phosphatase 6	HYDROLASE	DUS6_HUMAN	Inactivates MAP kinases. Has a specificity for the ERK family.	NONE	NONE
1qkt_v	4	2.834	0.7086	-0.204652	3	1	0	0	0	0	Estrogen receptor	NUCLEAR RECEPTOR	ESR1_HUMAN	Nuclear hormone receptor. The steroid hormones and their receptors are involved in the regulation of eukaryotic gene expression and affect cellular proliferation and differentiation in target tissues.	NONE	Melanoma;Brain tumor;Inflammation;Myocardial infarction;Fibrosis;Brain ischemia;Psoriasis;Rheumatoid arthritis;Retinitis pigmentosa;Atherosclerosis;Genitourinary disease;Breast disease;Atrophy;Crohns disease;Testosterone deficiency;Uterine fibroids;Fibrocystic breast disease;Arthralgia;Prostatitis;Prostate hyperplasia;Inflammatory bowel disease;Solid tumor;Gynecological disorder;Vascular disease;…
2of0_v	4	2.807	0.7019	0.208403	3	0	0	1	0	0	Beta-secretase 1	HYDROLASE	BACE1_HUMAN	Responsible for the proteolytic processing of the amyloid precursor protein (APP). Cleaves at the N-terminus of the A-beta peptide sequence, between residues 671 and 672 of APP, leads to the generation and extracellular release of beta-cleaved soluble APP	NONE	Alzheimers disease
1d3g_v	4	2.802	0.7006	0.0410271	3	0	1	0	0	0	Dihydroorotate dehydrogenase, mitochondrial	OXIDOREDUCTASE	PYRD_HUMAN	NONE	NONE	NONE
1mx1_v	4	2.764	0.6911	-0.0428448	3	1	0	0	0	0	Liver carboxylesterase 1	HYDROLASE	EST1_HUMAN	Involved in the detoxification of xenobiotics and in the activation of ester and amide prodrugs. Hydrolyzes aromatic and aliphatic esters, but has no catalytic activity toward amides or a fatty acyl CoA ester.	NONE	Arteriosclerosis;Cerebrovascular disease;Cancer;Melanoma;Multiple myeloma;Hypercholesterolemia;Atherosclerosis;Breast tumor;Hyperlipidemia;Solid tumor;Cardiovascular disease;Prostate tumor;Alzheimers disease;Dementia;Osteoporosis
3hvc_v	3	2.06	0.6865	-1.45477	3	0	0	0	0	0	NONE	NONE	NONE	NONE	NONE	NONE
2h8h_v	4	2.647	0.6617	-0.468197	3	1	0	0	0	0	Proto-oncogene tyrosine-protein kinase Src	TRANSFERASE	SRC_HUMAN	NONE	NONE	Hypercalcemia;Cancer;Osteoporosis;Cerebrovascular ischemia;Bone metastases;Metastasis;Solid tumor
2iit_v	6	3.917	0.6529	2.31562	5	0	0	1	0	0	Dipeptidyl peptidase 4	HYDROLASE	DPP4_HUMAN	Removes N-terminal dipeptides sequentially from polypeptides having unsubstituted N-termini provided that the penultimate residue is proline. Plays a role in T-cell activation.	NONE	Rheumatoid arthritis;Diabetes mellitus;Non-insulin dependent diabetes;Autoimmune disease;Immune disorder
1xlz_v	4	2.587	0.6466	-0.927801	3	1	0	0	0	0	cAMP-specific 3,5-cyclic phosphodiesterase 4B	HYDROLASE	PDE4B_HUMAN	May be involved in mediating central nervous system effects of therapeutic agents ranging from antidepressants to antiasthmatic and anti-inflammatory agents.	NONE	Chronic obstructive pulmonary disease;Asthma
1fcz_v	7	4.501	0.643	3.66639	6	0	0	0	1	0	Retinoic acid receptor gamma	GENE REGULATION	RARG_HUMAN	This is a receptor for retinoic acid. This metabolite has profound effects on vertebrate development. Retinoic acid is a morphogen and is a powerful teratogen. This receptor controls cell function by directly regulating gene expression.	NONE	Emphysema
2v61_v	4	2.561	0.6403	-0.653745	3	0	1	0	0	0	Amine oxidase [flavin-containing] B	OXIDOREDUCTASE	AOFB_HUMAN	Catalyzes the oxidative deamination of biogenic and xenobiotic amines and has important functions in the metabolism of neuroactive and vasoactive amines in the central nervous system and peripheral tissues. MAOB preferentially degrades benzylamine and phe	NONE	Alzheimers disease;Cocaine addiction;Major depressive disorder;Epilepsy;Neurodegenerative disease;Attention deficit hyperactivity disorder;Head injury;Parkinsons disease;Dementia;Nicotine dependence;Cerebrovascular ischemia
1rdt_v	7	4.409	0.6299	3.42714	6	0	0	0	1	0	Peroxisome proliferator-activated receptor gamma	HORMONE/GROWTH FACTOR	PPARG_HUMAN	Receptor that binds peroxisome proliferators such as hypolipidemic drugs and fatty acids. Once activated by a ligand, the receptor binds to a promoter element in the gene for acyl-CoA oxidase and activates its transcription. It therefore controls the pero	Defects in PPARG can lead to type 2 insulin-resistant diabetes and hyptertension.;Defects in PPARG may be associated with susceptibility to obesity [MIM:601665].;Defects in PPARG may be associated with colon cancer.;Defects in PPARG are the cause of familial partial lipodystrophy type 3 (FPLD3) [MIM:604367]. Familial partial lipodystrophies (FPLD) are a heterogeneous group of genetic disorders ch…	Asthma;Cerebrovascular ischemia;Conjunctivitis;Inflammation;Multiple sclerosis;Fibrosis;Unidentified indication;Psoriasis;Heart arrhythmia;Rheumatoid arthritis;Atherosclerosis;Corneal disease;Cardiovascular disease;Ulcerative colitis;Alzheimers disease;Infertility;Syndrome X;Lipid metabolism disorder;Non-insulin dependent diabetes;Metabolic disorder;Diabetic complication;Hyperlipidemia;Lacrimal g…
1lhn_v	6	3.722	0.6203	1.48701	4	1	1	0	0	0	Sex hormone-binding globulin	TRANSPORT PROTEIN	SHBG_HUMAN	Functions as an androgen transport protein, but may also be involved in receptor mediated processes. Each dimer binds one molecule of steroid. Specific for 5-alpha-dihydrotestosterone, testosterone, and 17-beta-estradiol. Regulates the plasma metabolic cl	NONE	NONE
1gse_v	6	3.621	0.6035	1.46382	5	1	0	0	0	0	Glutathione S-transferase A1	NONE	P08263	Involved in glutathione transferase activity	NONE	For nutritional supplementation, also for treating dietary shortage or imbalance
3czr_v	5	2.996	0.5991	-0.0944187	4	1	0	0	0	0	Corticosteroid 11-beta-dehydrogenase isozyme 1	OXIDOREDUCTASE	DHI1_HUMAN	Catalyzes reversibly the conversion of cortisol to the inactive metabolite cortisone. Catalyzes reversibly the conversion of 7-ketocholesterol to 7-beta-hydroxycholesterol. In intact cells, the reaction runs only in one direction, from 7- ketocholesterol	Defects in HSD11B1 are a cause of cortisone reductase deficiency (CRD) [MIM:604931]. In CRD, activation of cortisone to cortisol does not occur, resulting in adrenocorticotropin-mediated androgen excess and a phenotype resembling polycystic ovary syndrome (PCOS).	Non-insulin dependent diabetes;Rheumatoid arthritis;Diabetes mellitus;Obesity;Atherosclerosis;Metabolic disorder;Periodontitis
1mvc_v	7	4.181	0.5972	2.87779	6	0	0	0	1	0	Retinoic acid receptor RXR-alpha	TRANSCRIPTION	RXRA_HUMAN	Nuclear hormone receptor. Involved in the retinoic acid response pathway. Binds 9-cis retinoic acid (9C-RA). ARF6 acts as a key regulator of the tissue-specific adipocyte P2 (aP2) enhancer (By similarity).	NONE	Acute promyelocytic leukemia
1g30_v	5	2.983	0.5966	0.29456	4	0	0	1	0	0	Prothrombin	HYDROLASE	THRB_HUMAN	Thrombin, which cleaves bonds after Arg and Lys, converts fibrinogen to fibrin and activates factors V, VII, VIII, XIII, and, in complex with thrombomodulin, protein C. Functions in blood homeostasis, inflammation and wound healing.	Defects in F2 are the cause of various forms of dysprothrombinemia [MIM:176930].;Genetic variations in F2 may be a cause of susceptibility to ischemic stroke [MIM:601367]; also known as cerebrovascular accident or cerebral infarction. A stroke is an acute neurologic event leading to death of neural tissue of the brain and resulting in loss of motor, sensory and/or cognitive function. Ischemic str…	Deep vein thrombosis;Thrombocytopenia;Cerebrovascular disease;Wound healing;Ebola virus infection;Bone injury;Cerebrovascular ischemia;Restenosis;Thrombosis;Diabetic foot ulcer;Ischemic heart disease;Marburg virus infection;Myocardial disease;Embolism and thrombosis;Myocardial infarction;Cartilage disease;Thromboembolism;Coronary artery disease;Hemophilia;Blood clotting disorder;Bleeding;Atrial f…
3f7z_v	5	2.982	0.5964	0.398713	3	2	0	0	0	0	Glycogen synthase kinase-3 beta	NONE	P49841	Involved in protein kinase activity	NONE	NONE
1mrq_v	5	2.978	0.5955	0.299645	4	1	0	0	0	0	Aldo-keto reductase family 1 member C1	NONE	Q04828	Involved in oxidoreductase activity	NONE	Some evidence suggests that NADH might be useful in treating Parkinsons disease, chronic fatigue syndrome, Alzheimers disease and cardiovascular disease.
3ekr_v	5	2.962	0.5925	0.363756	3	1	1	0	0	0	Heat shock protein HSP 90-alpha	NONE	P07900	Posttranslational modification, protein turnover, chaperones	NONE	For the prevention of disseminated <i>Mycobacterium avium</i> complex (MAC) disease in patients with advanced HIV infection.
2rfn_v	5	2.932	0.5865	0.261946	4	1	0	0	0	0	Hepatocyte growth factor receptor	NONE	P08581	Involved in hepatocyte growth factor activity	NONE	NONE
2qtu_v	5	2.929	0.5857	0.485878	3	1	1	0	0	0	Estrogen receptor beta	NONE	Q92731	Involved in transcription factor activity	NONE	For the prevention of osteoporosis in post-menopausal women
1s1p_v	5	2.911	0.5821	0.233773	3	2	0	0	0	0	Aldo-keto reductase family 1 member C3	OXIDOREDUCTASE	AK1C3_HUMAN	Catalyzes the conversion of aldehydes and ketones to alcohols. Catalyzes the reduction of prostaglandin (PG) D2, PGH2 and phenanthrenequinone (PQ) and the oxidation of 9-alpha,11-beta- PGF2 to PGD2. Functions as a bi-directional 3-alpha-, 17-beta- and 20-	NONE	NONE
1q8u_v	5	2.907	0.5815	0.405265	3	1	0	1	0	0	cAMP-dependent protein kinase catalytic subunit alpha	NONE	P00517	Involved in protein serine/threonine kinase activity	NONE	NONE
2i6b_v	6	3.475	0.5791	0.913411	5	1	0	0	0	0	Adenosine kinase	NONE	P55263	ATP dependent phosphorylation of adenosine and other related nucleoside analogs to monophosphate derivatives. Serves as a potential regulator of concentrations of extracellular adenosine and intracellular adenine nucleotides.	NONE	NONE
1fzv_v	5	2.892	0.5783	0.208269	3	0	2	0	0	0	Placenta growth factor	HORMONE/GROWTH FACTOR	PLGF_HUMAN	Growth factor active in angiogenesis, and endothelial cell growth, stimulating their proliferation and migration. It binds to receptor VEGFR-1/FLT1. PLGF-2 binds neuropilin-1 and 2 in a heparin-dependent manner.	NONE	Retinopathy;Vascular disease;Diabetic macular edema;Inflammation;Cancer;Gastrointestinal disease;Age related macular degeneration
1ctr_v	5	2.89	0.5779	-0.346613	5	0	0	0	0	0	Calmodulin	CALCIUM-BINDING PROTEIN	CALM_HUMAN	Calmodulin mediates the control of a large number of enzymes and other proteins by Ca(2+). Among the enzymes to be stimulated by the calmodulin-Ca(2+) complex are a number of protein kinases and phosphatases. Together with CEP110 and centrin, is involved	NONE	NONE
1qab_v	6	3.463	0.5771	1.21201	5	0	1	0	0	0	Retinol-binding protein 4	TRANSPORT PROTEIN	RET4_HUMAN	Delivers retinol from the liver stores to the peripheral tissues. In plasma, the RBP-retinol complex interacts with transthyretin, this prevents its loss by filtration through the kidney glomeruli.	Defects in RBP4 are a cause of retinol-binding protein deficiency [MIM:180250]. This condition causes night vision problems. It produces a typical fundus xerophthalmicus, featuring a progressed atrophy of the retinal pigment epithelium.;A deficiency of vitamin A blocks secretion of the binding protein post-translationally and results in defective delivery and supply of vitamin to the epidermal ce…	NONE
2shp_v	5	2.879	0.5758	-0.408294	4	0	0	1	0	0	Tyrosine-protein phosphatase non-receptor type 11	TYROSINE PHOSPHATASE	PTN11_HUMAN	Acts downstream of various receptor and cytoplasmic protein tyrosine kinases to participate in the signal transduction from the cell surface to the nucleus.	Defects in PTPN11 are the cause of LEOPARD syndrome [MIM:151100]. It is an autosomal dominant disorder allelic with Noonan syndrome. The acronym LEOPARD stands for lentigines, electrocardiographic conduction abnormalities, ocular hypertelorism, pulmonic stenosis, abnormalities of genitalia, retardation of growth, and deafness.;Defects in PTPN11 are the cause of Noonan syndrome 1 (NS1) [MIM:163950…	NONE
1h6g_v	5	2.873	0.5746	0.142834	3	2	0	0	0	0	Catenin alpha-1	CYTOSKELETON	CTNA1_HUMAN	Associates with the cytoplasmic domain of a variety of cadherins. The association of catenins to cadherins produces a complex which is linked to the actin filament network, and which seems to be of primary importance for cadherins cell-adhesion properties	Abnormalities of alpha-catenin are involved in the process of cancer invasion and metastasis.	NONE
3f0r_v	5	2.858	0.5716	-0.175329	4	0	1	0	0	0	Histone deacetylase 8	NONE	Q9BY41	Chromatin structure and dynamics	NONE	For the treatment of cutaneous manifestations in patients with cutaneous T-cell lymphoma who have progressive, persistent or recurrent disease on or following two systemic therapies.
2qu5_v	5	2.857	0.5714	0.374869	4	0	0	0	0	1	Vascular endothelial growth factor receptor 2	NONE	P35968	Tyrosine-protein kinase that acts as a cell-surface receptor for VEGFA, VEGFC and VEGFD. Plays an essential role in the regulation of angiogenesis, vascular development, vascular permeability, and embryonic hematopoiesis. Promotes proliferation, survival, migration and differentiation of endothelial cells. Promotes reorganization of the actin cytoskeleton. Isoforms lacking a transmembrane domain,…	NONE	NONE
11gs_v	7	3.991	0.5701	1.81821	5	1	0	0	1	0	Glutathione S-transferase P	TRANSFERASE	GSTP1_HUMAN	Conjugation of reduced glutathione to a wide number of exogenous and endogenous hydrophobic electrophiles.	NONE	NONE
1pye_v	6	3.416	0.5694	1.34564	4	1	0	1	0	0	Cell division protein kinase 2	NONE	P24941	Involved in protein kinase activity	NONE	NONE
1q22_v	7	3.977	0.5682	1.59646	6	1	0	0	0	0	Sulfotransferase family cytosolic 2B member 1	NONE	O00204	Involved in sulfotransferase activity	NONE	NONE
1xvp_v	6	3.332	0.5553	0.904956	6	0	0	0	0	0	Nuclear receptor subfamily 1 group I member 3	DNA BINDING PROTEIN	NR1I3_HUMAN	Binds and transactivates the retinoic acid response elements that control expression of the retinoic acid receptor beta 2 and alcohol dehydrogenase 3 genes. Transactivates both the phenobarbital responsive element module of the human CYP2B6 gene and the C	NONE	NONE
1y2b_v	5	2.7	0.5401	-0.484276	3	1	1	0	0	0	cAMP-specific 3,5-cyclic phosphodiesterase 4D	HYDROLASE	PDE4D_HUMAN	Regulates the levels of cAMP in the cell.	Genetic variations in PDE4D might be associated with susceptibility to stroke type 1 (STRK1) [MIM:606799]. A stroke is an acute neurologic event leading to death of neural tissue of the brain and resulting in loss of motor, sensory and/or cognitive function. PubMed:17006457 states that association with stroke has to be considered with caution.	NONE
1m6w_v	5	2.674	0.5347	-0.571107	3	0	1	0	1	0	Alcohol dehydrogenase class-3	OXIDOREDUCTASE	ADHX_HUMAN	Class-III ADH is remarkably ineffective in oxidizing ethanol, but it readily catalyzes the oxidation of long-chain primary alcohols and the oxidation of S-(hydroxymethyl) glutathione.	NONE	NONE
2zn7_v	5	2.645	0.5291	-0.479646	3	0	0	0	2	0	Tyrosine-protein phosphatase non-receptor type 1	NONE	P18031	Involved in protein tyrosine phosphatase activity	NONE	For the management of hypercalcemia of malignancy and as an adjunct in the management of osteolysis resulting from bone metastases of malignant tumors.
1o6u_v	5	2.636	0.5272	-0.994909	5	0	0	0	0	0	SEC14-like protein 2	NONE	O76054	Involved in transporter activity	NONE	Vitamin E, known for its antioxidant activities, is protective against cardiovascular disease and some forms of cancer and has also demonstrated immune-enhancing effects. It may be of limited benefit in some with asthma and rheumatoid arthritis. It may be helpful in some neurological diseases including Alzheimers, some eye disorders including cataracts, and diabetes and premenstrual syndrome. It …
2vd1_v	6	3.158	0.5264	0.249445	5	1	0	0	0	0	Glutathione-requiring prostaglandin D synthase	ISOMERASE	PTGD2_HUMAN	Catalyzes the conversion of PGH2 to PGD2, a prostaglandin involved in smooth muscle contraction/relaxation and a potent inhibitor of platelet aggregation.	NONE	NONE
2hmb_v	7	3.663	0.5232	0.888405	5	1	0	0	1	0	Fatty acid-binding protein, heart	LIPID-BINDING PROTEIN	FABPH_HUMAN	FABP are thought to play a role in the intracellular transport of long-chain fatty acids and their acyl-CoA esters.	NONE	NONE
1n83_v	4	2.083	0.5207	-2.50991	4	0	0	0	0	0	Nuclear receptor ROR-alpha	LIPID BINDING PROTEIN	RORA_HUMAN	Orphan nuclear receptor. Binds DNA as a monomer to hormone response elements (HRE) containing a single core motif half-site preceded by a short A-T-rich sequence. This isomer binds to the consensus sequence 5-[AT][TA]A[AT][CGT]TAGGTCA-3.	NONE	NONE
1fe3_v	7	3.545	0.5064	0.596709	6	0	0	0	1	0	Fatty acid-binding protein, brain	LIPID BINDING PROTEIN	FABP7_HUMAN	B-FABP could be involved in the transport of a so far unknown hydrophobic ligand with potential morphogenic activity during CNS development. It is required for the establishment of the radial glial fiber system in developing brain, a system that is necess	NONE	NONE
2pe0_v	4	2.02	0.505	-1.91371	3	1	0	0	0	0	3-phosphoinositide-dependent protein kinase 1	TRANSFERASE	PDPK1_HUMAN	Phosphorylates and activates not only PKB/AKT, but also PKA, PKC-zeta, RPS6KA1 and RPS6KB1. May play a general role in signaling processes and in development (By similarity). Isoform 3 is catalytically inactive.	NONE	NONE
1b56_v	5	2.519	0.5039	-1.00563	3	1	0	0	1	0	Fatty acid-binding protein, epidermal	LIPID-BINDING	FABP5_HUMAN	High specificity for fatty acids. Highest affinity for C18 chain length. Decreasing the chain length or introducing double bonds reduces the affinity. May be involved in keratinocyte differentiation.	NONE	NONE
1dxo_v	6	2.998	0.4996	0.197837	4	1	1	0	0	0	NAD(P)H dehydrogenase [quinone] 1	FLAVOPROTEIN	NQO1_HUMAN	The enzyme apparently serves as a quinone reductase in connection with conjugation reactions of hydroquinons involved in detoxification pathways as well as in biosynthetic processes such as the vitamin K-dependent gamma-carboxylation of glutamate residues	NONE	NONE
1t84_v	5	2.496	0.4991	-1.52878	5	0	0	0	0	0	Wiskott-Aldrich syndrome protein	SIGNALING PROTEIN	WASP_HUMAN	Effector protein for Rho-type GTPases, providing a link with the Arp2/3 complex that regulates the structure and dynamics of the actin cytoskeleton. Important for efficient actin polymerization. Possible regulator of lymphocyte and platelet function.	Defects in WAS are the cause of Wiskott-Aldrich syndrome (WAS) [MIM:301000]; also known as eczema-thrombocytopenia- immunodeficiency syndrome. WAS is an X-linked recessive immunodeficiency characterized by eczema, thrombocytopenia, recurrent infections, and bloody diarrhea. Death usually occurs before age 10.;Defects in WAS are the cause of thrombocytopenia type 1 (THC1) [MIM:313900]. Thrombocyto…	Wiskott-Aldrich syndrome
1iz2_v	6	2.987	0.4979	0.288197	3	1	2	0	0	0	Alpha-1-antitrypsin	PROTEIN BINDING	A1AT_HUMAN	Inhibitor of serine proteases. Its primary target is elastase, but it also has a moderate affinity for plasmin and thrombin. Inhibits trypsin, chymotrypsin and plasminogen activator. The aberrant form inhibits insulin-induced NO synthesis in platelets, de	The major physiological function of AAT is the protection of the lower respiratory tract against proteolytic destruction by human leukocyte elastase (HLE). A hereditary deficiency of AAT, is associated with a 20-30 fold increased risk of developing chronic obstructive pulmonary disease.;Deficiency of the normal inhibitor in individuals homozygous for allele Z or M-Malton can result in the develop…	Psoriasis;Genital tract inflammation;Otitis media;Wound healing;Atopic dermatitis;Dermatitis;Cystitis;Inflammatory bowel disease;Cystic fibrosis;Alpha-1 antitrypsin deficiency;Dermatological disease
2bu5_v	6	2.985	0.4974	-0.248745	5	1	0	0	0	0	[Pyruvate dehydrogenase [lipoamide]] kinase isozyme 2, mitochondrial	TRANSFERASE	PDK2_HUMAN	Inhibits the mitochondrial pyruvate dehydrogenase complex by phosphorylation of the E1 alpha subunit, thus contributing to the regulation of glucose metabolism.	NONE	NONE
1sz7_v	6	2.98	0.4966	-0.141144	5	1	0	0	0	0	Trafficking protein particle complex subunit 3	NONE	O43617	May play a role in vesicular transport from endoplasmic reticulum to Golgi	NONE	NONE
1uhl_v	6	2.964	0.494	-0.107924	5	1	0	0	0	0	Oxysterols receptor LXR-alpha	DNA BINDING PROTEIN	NR1H3_HUMAN	Orphan receptor. Interaction with RXR shifts RXR from its role as a silent DNA-binding partner to an active ligand- binding subunit in mediating retinoid responses through target genes defined by LXRES. LXRES are DR4-type response elements characterized b	NONE	NONE
1upw_v	6	2.959	0.4932	-0.163384	5	0	1	0	0	0	Oxysterols receptor LXR-beta	RECEPTOR	NR1H2_HUMAN	Orphan receptor. Binds preferentially to double-stranded oligonucleotide direct repeats having the consensus half-site sequence 5-AGGTCA-3 and 4-nt spacing (DR-4).	NONE	Lipid metabolism disorder;Atherosclerosis
1r7y_v	6	2.957	0.4928	0.210804	3	0	2	1	0	0	Histo-blood group ABO system transferase	NONE	P16442	Involved in transferase activity, transferring hexosyl groups	NONE	NONE
3fv8_v	6	2.951	0.4918	-0.105242	5	1	0	0	0	0	Mitogen-activated protein kinase 10	NONE	P53779	Involved in MAP kinase activity	NONE	NONE
2bmg_v	6	2.918	0.4863	0.558485	4	0	1	0	0	1	Coagulation factor X	HYDROLASE	FA10_HUMAN	Factor Xa is a vitamin K-dependent glycoprotein that converts prothrombin to thrombin in the presence of factor Va, calcium and phospholipid during blood clotting.	NONE	Thromboembolism
2iw6_v	7	3.4	0.4857	0.889813	5	1	1	0	0	0	Cyclin-A2	CELL CYCLE COMPLEX	CCNA2_HUMAN	Essential for the control of the cell cycle at the G1/S (start) and the G2/M (mitosis) transitions.	NONE	NONE
1nhz_v	8	3.874	0.4842	1.07808	7	1	0	0	0	0	Glucocorticoid receptor	HORMONE RECEPTOR	GCR_HUMAN	Receptor for glucocorticoids (GC). Has a dual mode of action: as a transcription factor that binds to glucocorticoid response elements (GRE) and as a modulator of other transcription factors. Affects inflammatory responses, cellular proliferation and diff	Defects in NR3C1 are a cause of glucocorticoid resistance [MIM:138040]; also known as cortisol resistance. It is a hypertensive, hyperandrogenic disorder characterized by increased serum cortisol concentrations. Inheritance is autosomal dominant.	Alzheimers disease;Immune deficiency;Breast tumor;Major depressive disorder;Glaucoma;Metabolic disorder;Psychotic disorder;HIV infection;Cocaine addiction;Inflammation;Planned abortion;Diabetes mellitus;Weight gain;Endometriosis;Obesity;Insulin dependent diabetes;Cushings disease;Glioma;Endometroid carcinoma;Neurodegenerative disease;Hypertension;Hepatitis C virus infection;Carcinoma;Non-insulin …
2j14_v	6	2.889	0.4815	0.238697	4	0	0	0	1	1	Peroxisome proliferator-activated receptor delta	TRANSCRIPTION	PPARD_HUMAN	Receptor that binds peroxisome proliferators such as hypolipidemic drugs and fatty acids. Once activated by a ligand, the receptor binds to a promoter element in the gene for acyl-CoA oxidase and activates its transcription. It therefore controls the pero	NONE	Hyperlipidemia;Dermatological disease;Lipid metabolism disorder;Diabetes mellitus;Obesity;Metabolic disorder;Non-insulin dependent diabetes
1t4e_v	6	2.887	0.4812	-0.533274	6	0	0	0	0	0	E3 ubiquitin-protein ligase Mdm2	LIGASE	MDM2_HUMAN	Inhibits TP53/p53- and TP73/p73-mediated cell cycle arrest and apoptosis by binding its transcriptional activation domain. Functions as a ubiquitin ligase E3, in the presence of E1 and E2, toward p53 and itself. Permits the nuclear export of p53 and targe	Seems to be amplified in certain tumors (including soft tissue sarcomas, osteosarcomas and gliomas). A higher frequency of splice variants lacking p53 binding domain sequences was found in late-stage and high-grade ovarian and bladder carcinomas. Four of the splice variants show loss of p53 binding.	Leukemia;Cancer;Solid tumor
1xbb_v	6	2.882	0.4804	-0.449645	5	0	1	0	0	0	Tyrosine-protein kinase SYK	TRANSFERASE	KSYK_HUMAN	Positive effector of BCR-stimulated responses. Couples the B-cell antigen receptor (BCR) to the mobilization of calcium ion either through a phosphoinositide 3-kinase-dependent pathway, when not phosphorylated on tyrosines of the linker region, or through	NONE	Systemic lupus erythematosus;Asthma;Rheumatoid arthritis;Allergy;Allergic rhinitis;Inflammation;Thrombocytopenic purpura;Acute myelogenous leukemia;Lymphoma
1w6k_v	7	3.358	0.4796	0.708136	7	0	0	0	0	0	Lanosterol synthase	ISOMERASE	ERG7_HUMAN	Catalyzes the cyclization of (S)-2,3 oxidosqualene to lanosterol, a reaction that forms the sterol nucleus.	NONE	Hyperlipidemia;Hypercholesterolemia;Atherosclerosis
1xap_v	9	4.314	0.4793	1.85462	7	1	0	0	1	0	Retinoic acid receptor beta	TRANSCRIPTION	RARB_HUMAN	This is a receptor for retinoic acid. This metabolite has profound effects on vertebrate development. Retinoic acid is a morphogen and is a powerful teratogen. This receptor controls cell function by directly regulating gene expression.	NONE	Psoriasis;Acne;Cancer
1yvj_v	6	2.876	0.4793	-0.389739	4	1	1	0	0	0	Tyrosine-protein kinase JAK3	TRANSFERASE	JAK3_HUMAN	Tyrosine kinase of the non-receptor type, involved in the interleukin-2 and interleukin-4 signaling pathway. Phosphorylates STAT6, IRS1, IRS2 and PI3K.	Defects in JAK3 are a cause of severe combined immunodeficiency autosomal recessive T-cell-negative/B-cell- positive/NK-cell-negative (T(-)B(+)NK(-)SCID) [MIM:600802]. SCID refers to a genetically and clinically heterogeneous group of rare congenital disorders characterized by impairment of both humoral and cell-mediated immunity, leukopenia, and low or absent antibody levels. Patients with SCID …	Psoriasis;Transplant rejection;Rheumatoid arthritis;Respiratory tract inflammation;Autoimmune disease
1o1v_v	7	3.331	0.4758	0.35491	5	1	1	0	0	0	Gastrotropin	LIPID BINDING PROTEIN	FABP6_HUMAN	Ileal protein which stimulates gastric acid and pepsinogen secretion. Seems to be able to bind to bile salts and bilirubins.	NONE	NONE
1sm2_v	6	2.855	0.4758	-0.558491	4	2	0	0	0	0	Tyrosine-protein kinase ITK/TSK	NONE	Q08881	Involved in protein kinase activity	NONE	NONE
1qpd_v	6	2.851	0.4752	-0.45819	4	1	1	0	0	0	Proto-oncogene tyrosine-protein kinase LCK	TRANSFERASE	LCK_HUMAN	Tyrosine kinase that plays an essential role for the selection and maturation of developing T-cell in the thymus and in mature T-cell function. Is constitutively associated with the cytoplasmic portions of the CD4 and CD8 surface receptors and plays a key	A chromosomal aberration involving LCK is found in leukemias. Translocation t(1;7)(p34;q34) with TCRB.	Psoriasis;Cancer;Rheumatoid arthritis;Cardiac failure;Atherosclerosis;Delayed hypersensitivity;Transplant rejection;Inflammation;Multiple sclerosis;Autoimmune disease
1i7g_v	6	2.842	0.4737	-0.407836	4	2	0	0	0	0	Peroxisome proliferator-activated receptor alpha	TRANSCRIPTION	PPARA_HUMAN	Receptor that binds peroxisome proliferators such as hypolipidemic drugs and fatty acids. Once activated by a ligand, the receptor binds to a promoter element in the gene for acyl-CoA oxidase and activates its transcription. It therefore controls the pero	NONE	Syndrome X;Lipid metabolism disorder;Non-insulin dependent diabetes;Atherosclerosis;Hypertriglyceridemia;Hyperlipidemia;Cardiovascular disease;Congestive heart failure;Diabetes mellitus;Obesity;Inflammation
1sa4_v	7	3.278	0.4683	0.631299	5	0	0	2	0	0	Protein farnesyltransferase/geranylgeranyltransferase type-1 subunit alpha	TRANSFERASE	FNTA_HUMAN	Catalyzes the transfer of a farnesyl or geranyl-geranyl moiety from farnesyl or geranyl-geranyl pyrophosphate to a cysteine at the fourth position from the C-terminus of several proteins having the C-terminal sequence Cys-aliphatic-aliphatic-X. The alpha	NONE	NONE
1fls_v	6	2.806	0.4677	-0.718004	4	1	1	0	0	0	Collagenase 3	HYDROLASE	MMP13_HUMAN	Degrades collagen type I. Does not act on gelatin or casein. Could have a role in tumoral process.	Defects in MMP13 are the cause of spondyloepimetaphyseal dysplasia type 2 (SEMD2) [MIM:602111]; also known as spondyloepimetaphyseal dysplasia type Missouri. SEMDs are a heterogeneous group of skeletal disorders characterized by defective growth and modeling of the spine and long bones. The SEMDs are distinguished from the spondylometaphyseal dysplasias and the spondyloepiphyseal dysplasias by th…	NONE
3bbt_v	6	2.786	0.4644	-0.484795	5	1	0	0	0	0	Receptor tyrosine-protein kinase erbB-4	TRANSFERASE	ERBB4_HUMAN	Specifically binds and is activated by neuregulins, NRG- 2, NRG-3, heparin-binding EGF-like growth factor, betacellulin and NTAK. Interaction with these factors induces cell differentiation. Not activated by EGF, TGF-A, and amphiregulin.	NONE	NONE
1itu_v	8	3.711	0.4639	0.849966	4	2	1	0	1	0	Dipeptidase 1	HYDROLASE	DPEP1_HUMAN	Hydrolyzes a wide range of dipeptides. Implicated in the renal metabolism of glutathione and its conjugates. Converts leukotriene D4 to leukotriene E4; it may play an important role in the regulation of leukotriene activity.	NONE	NONE
1hrk_v	8	3.574	0.4468	0.974099	5	1	2	0	0	0	Ferrochelatase, mitochondrial	NONE	P22830	Coenzyme transport and metabolism	NONE	NONE
1kqu_v	8	3.495	0.4369	0.649875	5	2	0	0	1	0	Phospholipase A2, membrane associated	NONE	P14555	Involved in phospholipase A2 activity	NONE	NONE
1h9u_v	10	4.285	0.4285	1.34765	8	1	0	0	1	0	Retinoic acid receptor RXR-beta	NUCLEAR RECEPTOR	RXRB_HUMAN	Nuclear hormone receptor. Involved in the retinoic acid response pathway. Binds 9-cis retinoic acid (9C-RA).	NONE	NONE
1p62_v	7	2.989	0.427	0.116087	3	3	1	0	0	0	Deoxycytidine kinase	TRANSFERASE	DCK_HUMAN	Required for the phosphorylation of the deoxyribonucleosides deoxycytidine (dC), deoxyguanosine (dG) and deoxyadenosine (dA). It is also an essential enzyme for the phosphorylation of numerous nucleoside analogs widely employed as antiviral and chemothera	NONE	NONE
1g3m_v	7	2.977	0.4253	-0.299662	6	1	0	0	0	0	Estrogen sulfotransferase	TRANSFERASE	ST1E1_HUMAN	May control the level of the estrogen receptor by sulfurylating free estradiol. Maximally sulfates beta-estradiol and estrone at concentrations of 20 nM. Also sulfates dehydroepiandrosterone, pregnenolone, ethinylestradiol, equalenin, diethylstilbesterol	NONE	NONE
1xjd_v	7	2.969	0.4241	-0.193004	4	1	1	1	0	0	Protein kinase C theta type	TRANSFERASE	KPCT_HUMAN	This is a calcium-independent, phospholipid-dependent, serine- and threonine-specific enzyme. Essential for T-cell receptor (TCR)-mediated T-cell activation, but is dispensable during TCR-dependent thymocyte development. Links the TCR signaling complex to;PKC is activated by diacylglycerol which in turn phosphorylates a range of cellular proteins. PKC also serves as the receptor for phorbol ester…	NONE	Inflammation
2o9i_v	7	2.965	0.4235	-0.357672	5	2	0	0	0	0	Nuclear receptor subfamily 1 group I member 2	TRANSCRIPTION	NR1I2_HUMAN	Orphan receptor; its natural ligand is probably pregnane. Binds to a response element in the CYP3A4 and ABCB1/MDR1 genes promoter. Activates its expression in response to a wide variety of endobiotics and xenobiotics.	NONE	NONE
1u59_v	7	2.964	0.4235	-0.177252	4	1	2	0	0	0	Tyrosine-protein kinase ZAP-70	TRANSFERASE	ZAP70_HUMAN	Plays a role in T-cell development and lymphocyte activation. Essential for TCR-mediated IL-2 production. Isoform 1 induces TCR-mediated signal transduction, isoform 2 does not.	Defects in ZAP70 are the cause of selective T-cell defect (STD) [MIM:176947]. STD is an autosomal recessive form of severe combined immunodeficiency characterized by a selective absence of CD8-type T-cells.	Transplant rejection;Immune disorder
3bej_v	7	2.96	0.4228	0.0132755	4	1	1	0	1	0	Bile acid receptor	TRANSCRIPTION REGULATOR	NR1H4_HUMAN	Receptor for bile acids such as chenodeoxycholic acid, lithocholic acid and deoxycholic acid. Represses the transcription of the cholesterol 7-alpha-hydroxylase gene (CYP7A1) and activates the intestinal bile acid-binding protein (IBABP). Activates the tr	NONE	Liver fibrosis;Non-insulin dependent diabetes;Atherosclerosis;Hypertriglyceridemia;Hyperlipidemia;Liver disease;Primary biliary cirrhosis;Non-alcoholic steatohepatitis
1nav_v	7	2.959	0.4227	-0.443695	4	2	1	0	0	0	Thyroid hormone receptor alpha	NONE	P10827	Involved in transcription factor activity	NONE	Used as replacement or supplemental therapy in patients with hypothyroidism of any etiology, except transient hypothyrodism during the recovery phase of subacute thyroiditis.
1r9o_v	7	2.953	0.4219	-0.338355	4	2	0	0	1	0	Cytochrome P450 2C9	OXIDOREDUCTASE	CP2C9_HUMAN	Cytochromes P450 are a group of heme-thiolate monooxygenases. In liver microsomes, this enzyme is involved in an NADPH-dependent electron transport pathway. It oxidizes a variety of structurally unrelated compounds, including steroids, fatty acids, and xe	NONE	NONE
1lv2_v	7	2.94	0.42	-0.46255	5	1	0	0	1	0	Hepatocyte nuclear factor 4-gamma	NONE	Q14541	Involved in transcription factor activity	NONE	NONE
2iko_v	7	2.937	0.4195	-0.220227	5	0	2	0	0	0	Renin	HYDROLASE	RENI_HUMAN	Renin is a highly specific endopeptidase, whose only known function is to generate angiotensin I from angiotensinogen in the plasma, initiating a cascade of reactions that produce an elevation of blood pressure and increased sodium retention by the kidney	Defects in REN are a cause of renal tubular dysgenesis (RTD) [MIM:267430]. RTD is an autosomal recessive severe disorder of renal tubular development characterized by persistent fetal anuria and perinatal death, probably due to pulmonary hypoplasia from early-onset oligohydramnios (the Potter phenotype).	Glaucoma;Renal disease;Cardiac failure;Atherosclerosis;HIV infection;Hypertension;Cardiovascular disease;Ocular hypertension;Renal failure
1hov_v	7	2.92	0.4171	-0.0019195	4	1	2	0	0	0	72 kDa type IV collagenase	HYDROLASE/HYDROLASE INHIBITOR	MMP2_HUMAN	In addition to gelatin and collagens, it cleaves KiSS1 at a Gly-	#NAME?	Defects in MMP2 are the cause of multicentric osteolysis nodulosis and arthropathy (MONA) [MIM:605156]. Inherited osteolyses or vanishing bone syndromes are rare disorders of unknown etiology characterized by destruction and resorption of affected bones. MONA is an autosomal recessive osteolysis with multicentric involvement characterized by carpal and tarsal resorption, crippling arthritic chang…	NONE
1irj_v	7	2.918	0.4168	-0.19423	4	0	3	0	0	0	Protein S100-A9	METAL BINDING PROTEIN	S10A9_HUMAN	Expressed by macrophages in acutely inflammated tissues and in chronic inflammations. Seem to be an inhibitor of protein kinases. Also expressed in epithelial cells constitutively or induced during dermatoses. May interact with components of the intermedi	NONE	NONE
3cbs_v	9	3.737	0.4152	0.497793	6	2	0	0	1	0	Cellular retinoic acid-binding protein 2	NONE	P29373	Involved in retinoid binding	NONE	For topical treatment of cutaneous lesions in patients with AIDS-related Kaposis sarcoma.
1x89_v	7	2.883	0.4119	-0.450652	5	1	0	0	1	0	Neutrophil gelatinase-associated lipocalin	ANTIMICROBIAL PROTEIN	NGAL_HUMAN	Transport of small lipophilic substances (Potential).	NONE	NONE
1rhr_v	8	3.283	0.4104	0.397439	7	0	0	0	1	0	Caspase-3	HYDROLASE	CASP3_HUMAN	Involved in the activation cascade of caspases responsible for apoptosis execution. At the onset of apoptosis it proteolytically cleaves poly(ADP-ribose) polymerase (PARP) at a 216-Asp-	-Gly-217 bond. Cleaves and activates sterol regulatory element bind	NONE	Cancer;Liver disease;Cognitive disorder;Neurodegenerative disease;Cerebrovascular ischemia
1uwj_v	7	2.852	0.4074	-0.472865	5	1	1	0	0	0	B-Raf proto-oncogene serine/threonine-protein kinase	KINASE	BRAF1_HUMAN	Involved in the transduction of mitogenic signals from the cell membrane to the nucleus. May play a role in the postsynaptic responses of hippocampal neuron.	Defects in BRAF are a cause of cardiofaciocutaneous syndrome (CFC syndrome) [MIM:115150]; also known as cardio-facio- cutaneous syndrome. CFC syndrome is characterized by a distinctive facial appearance, heart defects and mental retardation. Heart defects include pulmonic stenosis, atrial septal defects and hypertrophic cardiomyopathy. Some affected individuals present with ectodermal abnormaliti…	Melanoma;Cancer
3e5a_v	7	2.824	0.4035	-0.269901	4	1	2	0	0	0	Serine/threonine-protein kinase 6	NONE	O14965	Involved in protein kinase activity	NONE	NONE
1rw8_v	6	2.385	0.3975	-1.73132	5	1	0	0	0	0	TGF-beta receptor type-1	TRANSFERASE	TGFR1_HUMAN	On ligand binding, forms a receptor complex consisting of two type II and two type I transmembrane serine/threonine kinases. Type II receptors phosphorylate and activate type I receptors which autophosphorylate, then bind and activate SMAD transcriptional	Defects in TGFBR1 are the cause of Loeys-Dietz syndrome type 1A (LDS1A) [MIM:609192]; also known as Furlong syndrome or Loeys-Dietz aortic aneurysm syndrome (LDAS). LDS1 is an aortic aneurysm syndrome with widespread systemic involvement. The disorder is characterized by arterial tortuosity and aneurysms, craniosynostosis, hypertelorism, and bifid uvula or cleft palate. Other findings include exo…	Skin burns;Glomerulonephritis;Wound healing;Renal disease;Scleroderma;Glaucoma;Diabetic complication;Scar tissue;Inflammation;Urinary tract disease;Pulmonary fibrosis;Diabetic nephropathy;Fibrosis;Solid tumor;Angiogenesis disorder;Glioma;Cancer;Atherosclerosis;Glomerular disease;Lung tumor;Nephritis;Immune disorder;Bone marrow transplantation
1n69_v	7	2.77	0.3957	-0.785835	6	0	0	0	1	0	Proactivator polypeptide	NONE	P07602	Involved in enzyme activator activity	NONE	NONE
1svh_v	7	2.752	0.3931	-0.338496	4	1	1	1	0	0	cAMP-dependent protein kinase, alpha-catalytic subunit	NONE	P00517	Involved in protein serine/threonine kinase activity	NONE	NONE
1sd2_v	7	2.732	0.3903	-0.933152	3	1	3	0	0	0	S-methyl-5-thioadenosine phosphorylase	NONE	Q13126	Nucleotide transport and metabolism	NONE	For nutritional supplementation, also for treating dietary shortage or imbalance
1s0z_v	10	3.813	0.3813	1.02704	7	1	2	0	0	0	Vitamin D3 receptor	GENE REGULATION	VDR_HUMAN	Nuclear hormone receptor. Transcription factor that mediates the action of vitamin D3 by controlling the expression of hormone sensitive genes. Plays a central role in calcium homeostasis.	Defects in VDR are the cause of type IIA rickets [MIM:277440]; also known as hypocalcemic vitamin D-resistant rickets (HVDRR). HVDRR is most frequently an autosomal recessive disorder characterized by severe rickets, hypocalcemia and secondary hyperparathyroidism.	Pagets bone disease;Melanoma;Hyperthyroidism;Aging;Skin tumor;Acne;Breast tumor;Neurodegenerative disease;Acute myelogenous leukemia;Hepatocellular carcinoma;Prostate tumor;Pancreas tumor;Alzheimers disease;Multiple sclerosis;Psoriasis;Colon tumor;Cancer;Renal disease;Leukemia;Hyperparathyroidism;Sarcoidosis;Carcinoma;Insulin dependent diabetes;Transplant rejection;Osteoporosis
1s9j_v	9	3.431	0.3812	0.0950432	7	2	0	0	0	0	Dual specificity mitogen-activated protein kinase kinase 1	TRANSFERASE	MP2K1_HUMAN	Catalyzes the concomitant phosphorylation of a threonine and a tyrosine residue in a Thr-Glu-Tyr sequence located in MAP kinases. Activates ERK1 and ERK2 MAP kinases.	Defects in MAP2K1 are a cause of cardiofaciocutaneous syndrome (CFC syndrome) [MIM:115150]; also known as cardio-facio- cutaneous syndrome. CFC syndrome is characterized by a distinctive facial appearance, heart defects and mental retardation. Heart defects include pulmonic stenosis, atrial septal defects and hypertrophic cardiomyopathy. Some affected individuals present with ectodermal abnormali…	Colon tumor;Melanoma;Cancer;Rheumatoid arthritis;Non-small-cell lung cancer;Neurodegenerative disease;Breast tumor;Colorectal tumor;Transplant rejection;Inflammation;Pancreas tumor;Solid tumor
1uym_v	8	3.039	0.3798	0.282774	5	1	1	0	0	1	Heat shock protein HSP 90-beta	NONE	P08238	Posttranslational modification, protein turnover, chaperones	NONE	NONE
2e9v_v	7	2.646	0.3779	-0.913874	4	2	1	0	0	0	Serine/threonine-protein kinase Chk1	TRANSFERASE	CHK1_HUMAN	Required for checkpoint mediated cell cycle arrest in response to DNA damage or the presence of unreplicated DNA. May also negatively regulate cell cycle progression during unperturbed cell cycles. Recognizes the substrate consensus sequence [R-X-X- S/T].	NONE	Cancer;Solid tumor
2p4i_v	9	3.369	0.3743	0.351289	7	1	1	0	0	0	Angiopoietin-1 receptor	TRANSFERASE	TIE2_HUMAN	This protein is a protein tyrosine-kinase transmembrane receptor for angiopoietin 1. It may constitute the earliest mammalian endothelial cell lineage marker. Probably regulates endothelial cell proliferation, differentiation and guides the proper pattern	Defects in TEK are a cause of dominantly inherited venous malformations (VMCM) [MIM:600195]; an error of vascular morphogenesis characterized by dilated, serpiginous channels.	Retinopathy;Ovary tumor;Cancer;Renal cell carcinoma;Breast tumor;Solid tumor
1qvn_v	8	2.991	0.3738	-0.246789	6	0	1	1	0	0	Interleukin-2	CYTOKINE	IL2_HUMAN	Produced by T-cells in response to antigenic or mitogenic stimulation, this protein is required for T-cell proliferation and other activities crucial to regulation of the immune response. Can stimulate B-cells, monocytes, lymphokine- activated killer cell	A chromosomal aberration involving IL2 is found in a form of T-cell acute lymphoblastic leukemia (T-ALL). Translocation t(4;16)(q26;p13) with involves TNFRSF17.	Cancer
2gqg_v	8	2.978	0.3723	-0.0100101	5	1	2	0	0	0	Proto-oncogene tyrosine-protein kinase ABL1	NONE	P00519	Involved in protein kinase activity	NONE	For nutritional supplementation, also for treating dietary shortage or imbalance
1d5j_v	8	2.971	0.3714	-0.105161	4	1	3	0	0	0	Stromelysin-1	HYDROLASE	MMP3_HUMAN	Can degrade fibronectin, laminin, gelatins of type I, III, IV, and V; collagens III, IV, X, and IX, and cartilage proteoglycans. Activates procollagenase.	NONE	NONE
1jqe_v	8	2.961	0.3701	-0.56334	7	0	0	1	0	0	Histamine N-methyltransferase	NONE	P50135	Inactivates histamine by N-methylation. Plays an important role in degrading histamine and in regulating the airway response to histamine	NONE	For treatment of acute malarial attacks in non-immune subjects.
1l9n_v	8	2.956	0.3695	-0.624295	3	4	1	0	0	0	Protein-glutamine gamma-glutamyltransferase E	TRANSFERASE	TGM3_HUMAN	Catalyzes the cross-linking of proteins and the conjugation of polyamines to proteins. It is responsible for the later stages of cell envelope formation in the epidermis and the hair follicle.	NONE	NONE
1hw9_v	8	2.935	0.3669	-0.351057	5	1	1	0	1	0	3-hydroxy-3-methylglutaryl-coenzyme A reductase	OXIDOREDUCTASE	HMDH_HUMAN	This transmembrane glycoprotein is involved in the control of cholesterol biosynthesis. It is the rate-limiting enzyme of sterol biosynthesis.	NONE	Alzheimers disease;Renal disease;Lipid metabolism disorder;Cardiac failure;Hyperlipidemia;Intermittent claudication;Myocardial infarction;Coronary artery disease;Glioma;Hypercholesterolemia;Atherosclerosis;Peripheral arterial occlusive disease;Cardiovascular disease;Congestive heart failure;Angina;Hypertension;Heart disease;Cerebrovascular ischemia;Osteoporosis
2fgi_v	8	2.929	0.3662	-0.523419	6	2	0	0	0	0	Basic fibroblast growth factor receptor 1	TRANSFERASE	FGFR1_HUMAN	Receptor for basic fibroblast growth factor. A shorter form of the receptor could be a receptor for FGF1 (aFGF).	Defects in FGFR1 are a cause of Pfeiffer syndrome (PS) [MIM:101600]; also known as acrocephalosyndactyly type V (ACS5). PS is characterized by craniosynostosis (premature fusion of the skull sutures) with deviation and enlargement of the thumbs and great toes, brachymesophalangy, with phalangeal ankylosis and a varying degree of soft tissue syndactyly.;Defects in FGFR1 are a cause of isolated hyp…	NONE
1fki_v	8	2.903	0.3629	-0.511904	5	3	0	0	0	0	Peptidyl-prolyl cis-trans isomerase FKBP1A	CIS-TRANS ISOMERASE	FKB1A_HUMAN	May play a role in modulation of ryanodine receptor isoform-1 (RYR-1), a component of the calcium release channel of skeletal muscle sarcoplasmic reticulum. There are four molecules of FKBP12 per skeletal muscle RYR. PPIases accelerate the folding of prot	NONE	NONE
1dkf_v	8	2.9	0.3625	-0.515436	5	3	0	0	0	0	Retinoic acid receptor alpha	HORMONE/GROWTH FACTOR RECEPTOR	RARA_HUMAN	This is a receptor for retinoic acid. This metabolite has profound effects on vertebrate development. Retinoic acid is a morphogen and is a powerful teratogen. This receptor controls cell function by directly regulating gene expression.	Chromosomal aberrations involving RARA may be a cause of acute promyelocytic leukemia (APL). Translocation t(11;17)(q32;q21) with ZBTB16/PLZF; translocation t(15;17)(q21;q21) with PML; translocation t(5;17)(q32;q11) with NPM.	Squamous cell carcinoma;Psoriasis;Colon tumor;Cancer;Metabolic disorder;Leukemia;Breast tumor;Skin infection;Neutropenia;Carcinoma;Dermatological disease;Ocular disease;Genital system disease;Lymphoma;Immune disorder
1pic_v	9	2.974	0.3305	-0.0529927	5	1	1	0	2	0	Phosphatidylinositol 3-kinase regulatory subunit alpha	COMPLEX (PHOSPHOTRANSFERASE/RECEPTOR)	P85A_HUMAN	Binds to activated (phosphorylated) protein-Tyr kinases, through its SH2 domain, and acts as an adapter, mediating the association of the p110 catalytic unit to the plasma membrane. Necessary for the insulin-stimulated increase in glucose uptake and glyco	Defects in PIK3R1 are a cause of severe insulin resistance.	NONE
1t46_v	9	2.942	0.3269	-0.339457	5	1	1	2	0	0	Mast/stem cell growth factor receptor	TRANSFERASE ACTIVATOR	KIT_HUMAN	This is the receptor for stem cell factor (mast cell growth factor). It has a tyrosine-protein kinase activity. Binding of the ligands leads to the autophosphorylation of KIT and its association with substrates such as phosphatidylinositol 3-kinase (Pi3K)	Defects in KIT are a cause of piebaldism [MIM:172800]. Piebaldism is an autosomal dominant genetic developmental abnormality of pigmentation characterized by congenital patches of white skin and hair that lack melanocytes.;Defects in KIT are a cause of gastrointestinal stromal tumor (GIST) [MIM:606764].;Defects in KIT have been associated with testicular tumors [MIM:273300]. It includes germ cell…	Pancreas tumor;Ovary tumor;Cancer;Mastocytosis;Gastrointestinal tumor
1x0n_v	9	2.831	0.3146	-0.797818	5	1	2	0	1	0	Growth factor receptor-bound protein 2	PEPTIDE BINDING PROTEIN	GRB2_HUMAN	Adapter protein that provides a critical link between cell surface growth factor receptors and the Ras signaling pathway.;Isoform GRB3-3 does not bind to phosphorylated epidermal growth factor receptor (EGFR) but inhibits EGF-induced transactivation of a RAS-responsive element. Isoform GRB3-3 acts as a dominant negative protein over GRB2 and by suppressing proliferative sign	NONE	Leukemia;Breast tumor;Cancer
1jk7_v	9	2.741	0.3046	-0.990694	6	1	1	0	1	0	Serine/threonine-protein phosphatase PP1-gamma catalytic subunit	NONE	P36873	Signal transduction mechanisms	NONE	NONE
1gmy_v	9	2.638	0.2931	-0.993675	4	2	3	0	0	0	Cathepsin B	COMPLEX (HYDROLASE/INHIBITOR)	CATB_HUMAN	Thiol protease which is believed to participate in intracellular degradation and turnover of proteins. Has also been implicated in tumor invasion and metastasis.	NONE	Myocardial infarction;Arthritis;Inflammation;Cancer
2yxj_v	9	2.569	0.2854	-1.14808	6	1	1	1	0	0	Bcl-2-like protein 1	NONE	Q07817	Potent inhibitor of cell death. Inhibits activation of caspases. Appears to regulate cell death by blocking the voltage-dependent anion channel (VDAC) by binding to it and preventing the release of the caspase activator, CYC1, from the mitochondrial membrane. Also acts as a regulator of G2 checkpoint and progression to cytokinesis during mitosis.	NONE	NONE
1ln3_v	11	2.971	0.2701	-0.608647	9	0	0	1	1	0	Phosphatidylcholine transfer protein	NONE	Q9UKL6	Involved in phosphatidylcholine transmembrane transporter activity	NONE	NONE
3ljr_v	11	2.97	0.27	-0.619849	3	3	3	1	1	0	Glutathione S-transferase theta-2	TRANSFERASE	GSTT2_HUMAN	Conjugation of reduced glutathione to a wide number of exogenous and endogenous hydrophobic electrophiles. Has a sulfatase activity.	NONE	NONE
1njs_v	11	2.959	0.269	-0.464122	3	2	5	0	1	0	Trifunctional purine biosynthetic protein adenosine-3	TRANSFERASE	PUR2_HUMAN	NONE	NONE	Head and neck tumor;Carcinoma;Melanoma;Cancer;Sarcoma;Non-small-cell lung cancer;Breast tumor
1l8j_v	13	3.482	0.2678	0.570276	11	1	0	1	0	0	Endothelial protein C receptor	BLOOD CLOTTING	EPCR_HUMAN	Binds activated protein C. Enhances protein C activation by the thrombin-thrombomodulin complex; plays a role in the protein C pathway controlling blood coagulation.	NONE	NONE
2bxr_v	13	2.909	0.2238	0.11594	5	2	4	1	1	0	Amine oxidase [flavin-containing] A	OXIDOREDUCTASE	AOFA_HUMAN	Catalyzes the oxidative deamination of biogenic and xenobiotic amines and has important functions in the metabolism of neuroactive and vasoactive amines in the central nervous system and peripheral tissues. MAOA preferentially oxidizes biogenic amines suc	Defects in MAOA are the cause of Brunner syndrome [MIM:300615]. Brunner syndrome is a form of X-linked non- dysmorphic mild mental retardation. Male patients are affected by a syndrome of borderline mental retardation and exhibit abnormal behavior, including disturbed regulation of impulsive aggression. Obligate female carriers have normal intelligence and behavior.	Muscle spasm;Cerebral hypoxia;Pain;Major depressive disorder;Epilepsy;Cognitive disorder;Cerebral infarction;Attention deficit hyperactivity disorder;Anxiety disorder;Parkinsons disease;Neuropathic pain;Amnesia;Alzheimers disease;Nicotine dependence;Dementia;Cerebrovascular ischemia;Psychotic disorder

## Sheet: SwissTargetPrediction
Target	Common name,Uniprot ID	ChEMBL ID	Target Class	Known actives (3D/2D)
Cannabinoid receptor 2	CNR2	P34972	CHEMBL253	Family A G protein-coupled receptor
Anandamide amidohydrolase	FAAH	O00519	CHEMBL2243	Enzyme
Vanilloid receptor	TRPV1	Q8NER1	CHEMBL4794	Voltage-gated ion channel
C-X-C chemokine receptor type 3	CXCR3	P49682	CHEMBL4441	Family A G protein-coupled receptor
LXR-alpha	NR1H3	Q13133	CHEMBL2808	Nuclear receptor
Squalene monooxygenase	SQLE	Q14534	CHEMBL3592	Enzyme
Nuclear receptor subfamily 1 group I member 3 (by homology)	NR1I3	Q14994	CHEMBL5503	Nuclear receptor
Monoamine oxidase B	MAOB	P27338	CHEMBL2039	Oxidoreductase
Serotonin 2a (5-HT2a) receptor	HTR2A	P28223	CHEMBL224	Family A G protein-coupled receptor
Androgen Receptor (by homology)	AR	P10275	CHEMBL1871	Nuclear receptor
Cytochrome P450 19A1	CYP19A1	P11511	CHEMBL1978	Cytochrome P450
Estrogen receptor alpha	ESR1	P03372	CHEMBL206	Nuclear receptor
Muscarinic acetylcholine receptor M2	CHRM2	P08172	CHEMBL211	Family A G protein-coupled receptor
Acetylcholinesterase	ACHE	P22303	CHEMBL220	Hydrolase
Norepinephrine transporter	SLC6A2	P23975	CHEMBL222	Electrochemical transporter
Serotonin transporter	SLC6A4	P31645	CHEMBL228	Electrochemical transporter
Cytochrome P450 2C19	CYP2C19	P33261	CHEMBL3622	Cytochrome P450
DNA topoisomerase I	TOP1	P11387	CHEMBL1781	Isomerase
Estrogen receptor beta	ESR2	Q92731	CHEMBL242	Nuclear receptor
Butyrylcholinesterase	BCHE	P06276	CHEMBL1914	Hydrolase
Protein-tyrosine phosphatase 1B	PTPN1	P18031	CHEMBL335	Phosphatase
Monoglyceride lipase	MGLL	Q99685	CHEMBL4191	Enzyme
T-cell protein-tyrosine phosphatase	PTPN2	P17706	CHEMBL3807	Phosphatase
Cytochrome P450 1A2	CYP1A2	P05177	CHEMBL3356	Cytochrome P450
Testis-specific androgen-binding protein	SHBG	P04278	CHEMBL3305	Secreted protein
Cyclooxygenase-1	PTGS1	P23219	CHEMBL221	Oxidoreductase
Adenosine A1 receptor	ADORA1	P30542	CHEMBL226	Family A G protein-coupled receptor
Adenosine A2a receptor	ADORA2A	P29274	CHEMBL251	Family A G protein-coupled receptor
Adenosine A3 receptor	ADORA3	P0DMS8	CHEMBL256	Family A G protein-coupled receptor
UDP-glucuronosyltransferase 2B7	UGT2B7	P16662	CHEMBL4370	Enzyme
Zinc finger protein GLI2	GLI2	P10070	CHEMBL5119	Transcription factor
Zinc finger protein GLI1	GLI1	P08151	CHEMBL5461	Transcription factor
Nuclear receptor ROR-gamma	RORC	P51449	CHEMBL1741186	Nuclear receptor
Sterol regulatory element-binding protein 2	SREBF2	Q12772	CHEMBL1795166	Unclassified protein
Niemann-Pick C1-like protein 1	NPC1L1	Q9UHC9	CHEMBL2027	Other membrane protein
Fatty acid binding protein adipocyte	FABP4	P15090	CHEMBL2083	Fatty acid binding protein family
Peroxisome proliferator-activated receptor gamma	PPARG	P37231	CHEMBL235	Nuclear receptor
Cathepsin D	CTSD	P07339	CHEMBL2581	Protease
Telomerase reverse transcriptase	TERT	O14746	CHEMBL2916	Enzyme
Fatty acid binding protein muscle	FABP3	P05413	CHEMBL3344	Fatty acid binding protein family
Cytochrome P450 17A1	CYP17A1	P05093	CHEMBL3522	Cytochrome P450
Fatty acid binding protein epidermal	FABP5	Q01469	CHEMBL3674	Fatty acid binding protein family
Peroxisome proliferator-activated receptor delta	PPARD	Q03181	CHEMBL3979	Nuclear receptor
HMG-CoA reductase	HMGCR	P04035	CHEMBL402	Oxidoreductase
Fatty acid-binding protein, liver	FABP1	P07148	CHEMBL5421	Fatty acid binding protein family
Cannabinoid receptor 1 (by homology)	CNR1	P21554	CHEMBL218	Family A G protein-coupled receptor
Cytochrome P450 51 (by homology)	CYP51A1	Q16850	CHEMBL3849	Cytochrome P450
Steroid 5-alpha-reductase 1	SRD5A1	P18405	CHEMBL1787	Oxidoreductase
Steroid 5-alpha-reductase 2	SRD5A2	P31213	CHEMBL1856	Oxidoreductase
Mineralocorticoid receptor	NR3C2	P08235	CHEMBL1994	Nuclear receptor
Glucocorticoid receptor	NR3C1	P04150	CHEMBL2034	Nuclear receptor
Progesterone receptor	PGR	P06401	CHEMBL208	Nuclear receptor
Acyl coenzyme A:cholesterol acyltransferase	CES1	P23141	CHEMBL2265	Enzyme
Corticosteroid binding globulin	SERPINA6	P08185	CHEMBL2421	Secreted protein
Sigma opioid receptor	SIGMAR1	Q99720	CHEMBL287	Membrane receptor
Pregnane X receptor	NR1I2	O75469	CHEMBL3401	Nuclear receptor
Estradiol 17-beta-dehydrogenase 3	HSD17B3	P37058	CHEMBL4234	Enzyme
Acyl-CoA desaturase	SCD	O00767	CHEMBL5555	Enzyme
Arachidonate 5-lipoxygenase	ALOX5	P09917	CHEMBL215	Oxidoreductase
Plasma retinol-binding protein	RBP4	P02753	CHEMBL3100	Secreted protein
Protein-tyrosine phosphatase 1C	PTPN6	P29350	CHEMBL3166	Phosphatase
Transient receptor potential cation channel subfamily A member 1	TRPA1	O75762	CHEMBL6007	Voltage-gated ion channel
C-C chemokine receptor type 5	CCR5	P51681	CHEMBL274	Family A G protein-coupled receptor
Lanosterol synthase	LSS	P48449	CHEMBL3593	Enzyme
Squalene synthetase (by homology)	FDFT1	P37268	CHEMBL3338	Enzyme
Prostanoid EP1 receptor (by homology)	PTGER1	P34995	CHEMBL1811	Family A G protein-coupled receptor
Prostanoid EP2 receptor (by homology)	PTGER2	P43116	CHEMBL1881	Family A G protein-coupled receptor
Carboxylesterase 2	CES2	O00748	CHEMBL3180	Enzyme
Prolyl endopeptidase	PREP	P48147	CHEMBL3202	Protease
Free fatty acid receptor 1	FFAR1	O14842	CHEMBL4422	Family A G protein-coupled receptor
Prostaglandin E synthase	PTGES	O14684	CHEMBL5658	Enzyme
Vitamin D receptor	VDR	P11473	CHEMBL1977	Nuclear receptor
Retinoic acid receptor gamma	RARG	P13631	CHEMBL2003	Nuclear receptor
Retinoic acid receptor beta	RARB	P10826	CHEMBL2008	Nuclear receptor
Retinoic acid receptor alpha	RARA	P10276	CHEMBL2055	Nuclear receptor
Sphingosine kinase 2	SPHK2	Q9NRA0	CHEMBL3023	Enzyme
Cytosolic phospholipase A2	PLA2G4A	P47712	CHEMBL3816	Enzyme
Sphingosine kinase 1	SPHK1	Q9NYA1	CHEMBL4394	Enzyme
Nuclear receptor ROR-alpha	RORA	P35398	CHEMBL5868	Nuclear receptor
Protein farnesyltransferase	FNTA FNTB	P49354 P49356	CHEMBL2094108	Enzyme
HERG	KCNH2	Q12809	CHEMBL240	Voltage-gated ion channel
Peregrin	BRPF1	P55201	CHEMBL3132741	Reader
Platelet-derived growth factor receptor beta	PDGFRB	P09619	CHEMBL1913	Kinase
Vascular endothelial growth factor receptor 2	KDR	P35968	CHEMBL279	Kinase
Cyclooxygenase-2	PTGS2	P35354	CHEMBL230	Oxidoreductase
p53-binding protein Mdm-2	MDM2	Q00987	CHEMBL5023	Other nuclear protein
Dual specificity phosphatase Cdc25A	CDC25A	P30304	CHEMBL3775	Phosphatase
Thrombin and coagulation factor X	F10	P00742	CHEMBL244	Protease
C-C chemokine receptor type 3	CCR3	P51677	CHEMBL3473	Family A G protein-coupled receptor
Sphingosine 1-phosphate receptor Edg-3	S1PR3	Q99500	CHEMBL3892	Family A G protein-coupled receptor
Proteasome Macropain subunit MB1	PSMB5	P28074	CHEMBL4662	Protease
Histone deacetylase 6	HDAC6	Q9UBN7	CHEMBL1865	Eraser
Neuronal acetylcholine receptor; alpha4/beta2	CHRNA4 CHRNB2	P43681 P17787	CHEMBL1907589	Ligand-gated ion channel
Myeloperoxidase	MPO	P05164	CHEMBL2439	Enzyme
Histone deacetylase 1	HDAC1	Q13547	CHEMBL325	Eraser
Carnitine O-palmitoyltransferase 1, liver isoform	CPT1A	P50416	CHEMBL1293194	Enzyme
Scavenger receptor class B member 1 (by homology)	SCARB1	Q8WTV0	CHEMBL1914272	Unclassified protein
Quinone reductase 2	NQO2	P16083	CHEMBL3959	Enzyme
Glutaminase kidney isoform, mitochondrial	GLS	O94925	CHEMBL2146302	Enzyme
