# Supplementary material for: Food additive β-caryophyllene mitigates alcoholic steatohepatitis by dual modulation of inflammation and lipid metabolism: a diet-based intervention strategy
Source: Royal Society of Chemistry journal article supplement (doi:10.1039/d5fo01083g), 2025-01-01
Supplement: d5fo01083g3.xlsx [file d5fo01083g3.xlsx]

## Sheet: GeneCards
Gene Symbol	Description	Category	Uniprot ID	Gifts	GC Id	Relevance score	GeneCards Link
SLC17A5	Solute Carrier Family 17 Member 5	Protein Coding	Q9NRA2	58	GC06M073593	102.968	https://www.genecards.org/cgi-bin/carddisp.pl?gene=SLC17A5
TP53	Tumor Protein P53	Protein Coding	P04637	66	GC17M007661	96.0335	https://www.genecards.org/cgi-bin/carddisp.pl?gene=TP53
APOE	Apolipoprotein E	Protein Coding	P02649	63	GC19P123244	92.2178	https://www.genecards.org/cgi-bin/carddisp.pl?gene=APOE
PRKCSH	PRKCSH Beta Subunit Of Glucosidase II	Protein Coding	P14314	56	GC19P011435	91.2441	https://www.genecards.org/cgi-bin/carddisp.pl?gene=PRKCSH
PSEN1	Presenilin 1	Protein Coding	P49768	66	GC14P073136	86.0101	https://www.genecards.org/cgi-bin/carddisp.pl?gene=PSEN1
SQSTM1	Sequestosome 1	Protein Coding	Q13501	62	GC05P179806	84.6359	https://www.genecards.org/cgi-bin/carddisp.pl?gene=SQSTM1
IL6	Interleukin 6	Protein Coding	P05231	64	GC07P022725	81.9022	https://www.genecards.org/cgi-bin/carddisp.pl?gene=IL6
PIK3CA	Phosphatidylinositol-4,5-Bisphosphate 3-Kinase Catalytic Subunit Alpha	Protein Coding	P42336	66	GC03P179148	81.5586	https://www.genecards.org/cgi-bin/carddisp.pl?gene=PIK3CA
GANAB	Glucosidase II Alpha Subunit	Protein Coding	Q14697	58	GC11M128851	80.3761	https://www.genecards.org/cgi-bin/carddisp.pl?gene=GANAB
PNPLA3	Patatin Like Phospholipase Domain Containing 3	Protein Coding	Q9NST1	55	GC22P043923	69.4023	https://www.genecards.org/cgi-bin/carddisp.pl?gene=PNPLA3
SNCA	Synuclein Alpha	Protein Coding	P37840	64	GC04M089724	68.4329	https://www.genecards.org/cgi-bin/carddisp.pl?gene=SNCA
HNF4A	Hepatocyte Nuclear Factor 4 Alpha	Protein Coding	P41235	63	GC20P044355	66.7699	https://www.genecards.org/cgi-bin/carddisp.pl?gene=HNF4A
H19	H19 Imprinted Maternally Expressed Transcript	RNA Gene		36	GC11M001995	65.8249	https://www.genecards.org/cgi-bin/carddisp.pl?gene=H19
MIR21	MicroRNA 21	RNA Gene		33	GC17P123488	58.0962	https://www.genecards.org/cgi-bin/carddisp.pl?gene=MIR21
MIR7-3HG	MIR7-3 Host Gene	RNA Gene	Q8N6C7	35	GC19P122009	55.4608	https://www.genecards.org/cgi-bin/carddisp.pl?gene=MIR7-3HG
NF1	Neurofibromin 1	Protein Coding	P21359	60	GC17P031094	55.2156	https://www.genecards.org/cgi-bin/carddisp.pl?gene=NF1
CFTR	CF Transmembrane Conductance Regulator	Protein Coding	P13569	66	GC07P117287	55.1171	https://www.genecards.org/cgi-bin/carddisp.pl?gene=CFTR
HNF1A	HNF1 Homeobox A	Protein Coding	P20823	59	GC12P120978	53.4528	https://www.genecards.org/cgi-bin/carddisp.pl?gene=HNF1A
CRP	C-Reactive Protein	Protein Coding	P02741	59	GC01M164127	51.7561	https://www.genecards.org/cgi-bin/carddisp.pl?gene=CRP
MALAT1	Metastasis Associated Lung Adenocarcinoma Transcript 1	RNA Gene		33	GC11P094626	50.5074	https://www.genecards.org/cgi-bin/carddisp.pl?gene=MALAT1
BDNF-AS	BDNF Antisense RNA	RNA Gene		31	GC11P027466	48.6107	https://www.genecards.org/cgi-bin/carddisp.pl?gene=BDNF-AS
MIR122	MicroRNA 122	RNA Gene		30	GC18P058451	47.8398	https://www.genecards.org/cgi-bin/carddisp.pl?gene=MIR122
CCND1	Cyclin D1	Protein Coding	P24385	66	GC11P069641	46.6737	https://www.genecards.org/cgi-bin/carddisp.pl?gene=CCND1
ADIPOQ	Adiponectin, C1Q And Collagen Domain Containing	Protein Coding	Q15848	59	GC03P186842	44.9997	https://www.genecards.org/cgi-bin/carddisp.pl?gene=ADIPOQ
BRCA2	BRCA2 DNA Repair Associated	Protein Coding	P51587	60	GC13P032315	44.7541	https://www.genecards.org/cgi-bin/carddisp.pl?gene=BRCA2
GAS5	Growth Arrest Specific 5	RNA Gene		33	GC01M173947	43.9657	https://www.genecards.org/cgi-bin/carddisp.pl?gene=GAS5
BRCA1	BRCA1 DNA Repair Associated	Protein Coding	P38398	63	GC17M043044	43.0775	https://www.genecards.org/cgi-bin/carddisp.pl?gene=BRCA1
DNAJB11	DnaJ Heat Shock Protein Family (Hsp40) Member B11	Protein Coding	Q9UBS4	52	GC03P186567	42.5982	https://www.genecards.org/cgi-bin/carddisp.pl?gene=DNAJB11
NLRP3	NLR Family Pyrin Domain Containing 3	Protein Coding	Q96P20	61	GC01P247496	41.8223	https://www.genecards.org/cgi-bin/carddisp.pl?gene=NLRP3
GGT1	Gamma-Glutamyltransferase 1	Protein Coding	P19440	62	GC22P024583	40.9078	https://www.genecards.org/cgi-bin/carddisp.pl?gene=GGT1
COL2A1	Collagen Type II Alpha 1 Chain	Protein Coding	P02458	63	GC12M047972	40.4259	https://www.genecards.org/cgi-bin/carddisp.pl?gene=COL2A1
CYP2E1	Cytochrome P450 Family 2 Subfamily E Member 1	Protein Coding	P05181	59	GC10P133520	39.6008	https://www.genecards.org/cgi-bin/carddisp.pl?gene=CYP2E1
CDH1	Cadherin 1	Protein Coding	P12830	62	GC16P068737	39.3641	https://www.genecards.org/cgi-bin/carddisp.pl?gene=CDH1
LINC01672	Long Intergenic Non-Protein Coding RNA 1672	RNA Gene		21	GC01P050860	38.8468	https://www.genecards.org/cgi-bin/carddisp.pl?gene=LINC01672
DZIP1L	DAZ Interacting Zinc Finger Protein 1 Like	Protein Coding	Q8IYY4	48	GC03M138061	38.0866	https://www.genecards.org/cgi-bin/carddisp.pl?gene=DZIP1L
COMT	Catechol-O-Methyltransferase	Protein Coding	P21964	64	GC22P019941	37.8299	https://www.genecards.org/cgi-bin/carddisp.pl?gene=COMT
MIR214	MicroRNA 214	RNA Gene		31	GC01M172234	37.3779	https://www.genecards.org/cgi-bin/carddisp.pl?gene=MIR214
PRF1	Perforin 1	Protein Coding	P14222	59	GC10M070597	36.1853	https://www.genecards.org/cgi-bin/carddisp.pl?gene=PRF1
MIRLET7C	MicroRNA Let-7c	RNA Gene		31	GC21P018986	36.0256	https://www.genecards.org/cgi-bin/carddisp.pl?gene=MIRLET7C
IL17A	Interleukin 17A	Protein Coding	Q16552	56	GC06P052186	34.8323	https://www.genecards.org/cgi-bin/carddisp.pl?gene=IL17A
SOD2-OT1	SOD2 Overlapping Transcript 1	RNA Gene		21	GC06M159772	34.8152	https://www.genecards.org/cgi-bin/carddisp.pl?gene=SOD2-OT1
LINC-ROR	Long Intergenic Non-Protein Coding RNA, Regulator Of Reprogramming	RNA Gene		26	GC18M057054	32.864	https://www.genecards.org/cgi-bin/carddisp.pl?gene=LINC-ROR
ALDH2	Aldehyde Dehydrogenase 2 Family Member	Protein Coding	P05091	64	GC12P111766	32.2388	https://www.genecards.org/cgi-bin/carddisp.pl?gene=ALDH2
MIR23A	MicroRNA 23a	RNA Gene		30	GC19M096312	31.3661	https://www.genecards.org/cgi-bin/carddisp.pl?gene=MIR23A
CCR5	C-C Motif Chemokine Receptor 5	Protein Coding	P51681	60	GC03P059720	30.6015	https://www.genecards.org/cgi-bin/carddisp.pl?gene=CCR5
SLC6A3	Solute Carrier Family 6 Member 3	Protein Coding	Q01959	64	GC05M001392	30.5004	https://www.genecards.org/cgi-bin/carddisp.pl?gene=SLC6A3
ADH1C	Alcohol Dehydrogenase 1C (Class I), Gamma Polypeptide	Protein Coding	P00326	54	GC04M099336	30.4555	https://www.genecards.org/cgi-bin/carddisp.pl?gene=ADH1C
LINC02605	Long Intergenic Non-Protein Coding RNA 2605	RNA Gene		22	GC08P078838	30.4274	https://www.genecards.org/cgi-bin/carddisp.pl?gene=LINC02605
CYP1A1	Cytochrome P450 Family 1 Subfamily A Member 1	Protein Coding	P04798	60	GC15M074719	29.6012	https://www.genecards.org/cgi-bin/carddisp.pl?gene=CYP1A1
JUN	Jun Proto-Oncogene, AP-1 Transcription Factor Subunit	Protein Coding	P05412	63	GC01M058780	29.5041	https://www.genecards.org/cgi-bin/carddisp.pl?gene=JUN
HP	Haptoglobin	Protein Coding	P00738	58	GC16P097888	29.4699	https://www.genecards.org/cgi-bin/carddisp.pl?gene=HP
XDH	Xanthine Dehydrogenase	Protein Coding	P47989	60	GC02M031334	28.8227	https://www.genecards.org/cgi-bin/carddisp.pl?gene=XDH
MAOA	Monoamine Oxidase A	Protein Coding	P21397	62	GC0XP043654	28.0752	https://www.genecards.org/cgi-bin/carddisp.pl?gene=MAOA
MT-TP	Mitochondrially Encoded TRNA-Pro (CCN)	RNA Gene		17	GCMTM015957	27.9551	https://www.genecards.org/cgi-bin/carddisp.pl?gene=MT-TP
DNM1L	Dynamin 1 Like	Protein Coding	O00429	61	GC12P032679	27.7369	https://www.genecards.org/cgi-bin/carddisp.pl?gene=DNM1L
MIF	Macrophage Migration Inhibitory Factor	Protein Coding	P14174	60	GC22P023894	27.305	https://www.genecards.org/cgi-bin/carddisp.pl?gene=MIF
MIR216A	MicroRNA 216a	RNA Gene		29	GC02M055988	27.2328	https://www.genecards.org/cgi-bin/carddisp.pl?gene=MIR216A
CD14	CD14 Molecule	Protein Coding	P08571	59	GC05M140631	26.9792	https://www.genecards.org/cgi-bin/carddisp.pl?gene=CD14
CCL5	C-C Motif Chemokine Ligand 5	Protein Coding	P13501	56	GC17M035871	26.8523	https://www.genecards.org/cgi-bin/carddisp.pl?gene=CCL5
TIMP1	TIMP Metallopeptidase Inhibitor 1	Protein Coding	P01033	58	GC0XP058331	26.8239	https://www.genecards.org/cgi-bin/carddisp.pl?gene=TIMP1
ABCB7	ATP Binding Cassette Subfamily B Member 7	Protein Coding	O75027	57	GC0XM075053	26.6129	https://www.genecards.org/cgi-bin/carddisp.pl?gene=ABCB7
TBP	TATA-Box Binding Protein	Protein Coding	P20226	62	GC06P170554	26.5237	https://www.genecards.org/cgi-bin/carddisp.pl?gene=TBP
PALB2	Partner And Localizer Of BRCA2	Protein Coding	Q86YC2	57	GC16M023603	26.4315	https://www.genecards.org/cgi-bin/carddisp.pl?gene=PALB2
ALPP	Alkaline Phosphatase, Placental	Protein Coding	P05187	56	GC02P232378	25.4002	https://www.genecards.org/cgi-bin/carddisp.pl?gene=ALPP
CXCL10	C-X-C Motif Chemokine Ligand 10	Protein Coding	P02778	57	GC04M076021	25.2986	https://www.genecards.org/cgi-bin/carddisp.pl?gene=CXCL10
MIR34C	MicroRNA 34c	RNA Gene		31	GC11P112585	25.0973	https://www.genecards.org/cgi-bin/carddisp.pl?gene=MIR34C
HMGB1	High Mobility Group Box 1	Protein Coding	P09429	62	GC13M030456	24.306	https://www.genecards.org/cgi-bin/carddisp.pl?gene=HMGB1
CEL	Carboxyl Ester Lipase	Protein Coding	P19835	57	GC09P133061	24.2542	https://www.genecards.org/cgi-bin/carddisp.pl?gene=CEL
MAT1A	Methionine Adenosyltransferase 1A	Protein Coding	Q00266	59	GC10M080271	24.1375	https://www.genecards.org/cgi-bin/carddisp.pl?gene=MAT1A
TKT	Transketolase	Protein Coding	P29401	59	GC03M053224	23.6377	https://www.genecards.org/cgi-bin/carddisp.pl?gene=TKT
SLC6A4	Solute Carrier Family 6 Member 4	Protein Coding	P31645	61	GC17M030194	23.4594	https://www.genecards.org/cgi-bin/carddisp.pl?gene=SLC6A4
STIM1	Stromal Interaction Molecule 1	Protein Coding	Q13586	62	GC11P012431	23.2084	https://www.genecards.org/cgi-bin/carddisp.pl?gene=STIM1
TLR5	Toll Like Receptor 5	Protein Coding	O60602	60	GC01M223109	23.0682	https://www.genecards.org/cgi-bin/carddisp.pl?gene=TLR5
SFTA3	Surfactant Associated 3	RNA Gene	P0C7M3	44	GC14M036479	23.0455	https://www.genecards.org/cgi-bin/carddisp.pl?gene=SFTA3
ADH1B	Alcohol Dehydrogenase 1B (Class I), Beta Polypeptide	Protein Coding	P00325	58	GC04M099304	22.7871	https://www.genecards.org/cgi-bin/carddisp.pl?gene=ADH1B
BRIP1	BRCA1 Interacting Helicase 1	Protein Coding	Q9BX63	62	GC17M061679	22.7103	https://www.genecards.org/cgi-bin/carddisp.pl?gene=BRIP1
TM6SF2	Transmembrane 6 Superfamily Member 2	Protein Coding	Q9BZW4	43	GC19M019264	22.5168	https://www.genecards.org/cgi-bin/carddisp.pl?gene=TM6SF2
GHRL	Ghrelin And Obestatin Prepropeptide	Protein Coding	Q9UBU3	55	GC03M010285	22.3402	https://www.genecards.org/cgi-bin/carddisp.pl?gene=GHRL
PGR-AS1	PGR Antisense RNA 1	RNA Gene		20	GC11P101131	22.1969	https://www.genecards.org/cgi-bin/carddisp.pl?gene=PGR-AS1
ATF4	Activating Transcription Factor 4	Protein Coding	P18848	59	GC22P039519	21.6721	https://www.genecards.org/cgi-bin/carddisp.pl?gene=ATF4
XRCC1	X-Ray Repair Cross Complementing 1	Protein Coding	P18887	58	GC19M043543	21.4024	https://www.genecards.org/cgi-bin/carddisp.pl?gene=XRCC1
DSTYK	Dual Serine/Threonine And Tyrosine Protein Kinase	Protein Coding	Q6XUX3	54	GC01M205111	21.2967	https://www.genecards.org/cgi-bin/carddisp.pl?gene=DSTYK
GNAQ	G Protein Subunit Alpha Q	Protein Coding	P50148	62	GC09M077716	20.9083	https://www.genecards.org/cgi-bin/carddisp.pl?gene=GNAQ
MAT2A	Methionine Adenosyltransferase 2A	Protein Coding	P31153	59	GC02P086687	20.6894	https://www.genecards.org/cgi-bin/carddisp.pl?gene=MAT2A
HAVCR2	Hepatitis A Virus Cellular Receptor 2	Protein Coding	Q8TDQ0	59	GC05M157063	20.6006	https://www.genecards.org/cgi-bin/carddisp.pl?gene=HAVCR2
PIK3C2A	Phosphatidylinositol-4-Phosphate 3-Kinase Catalytic Subunit Type 2 Alpha	Protein Coding	O00443	60	GC11M017980	20.1216	https://www.genecards.org/cgi-bin/carddisp.pl?gene=PIK3C2A
CCL3	C-C Motif Chemokine Ligand 3	Protein Coding	P10147	54	GC17M036088	19.8603	https://www.genecards.org/cgi-bin/carddisp.pl?gene=CCL3
AKR1A1	Aldo-Keto Reductase Family 1 Member A1	Protein Coding	P14550	56	GC01P045550	19.7979	https://www.genecards.org/cgi-bin/carddisp.pl?gene=AKR1A1
HSP90AA1	Heat Shock Protein 90 Alpha Family Class A Member 1	Protein Coding	P07900	64	GC14M102080	19.3667	https://www.genecards.org/cgi-bin/carddisp.pl?gene=HSP90AA1
DRD2	Dopamine Receptor D2	Protein Coding	P14416	63	GC11M113409	19.3324	https://www.genecards.org/cgi-bin/carddisp.pl?gene=DRD2
RARB	Retinoic Acid Receptor Beta	Protein Coding	P10826	63	GC03P024689	19.2594	https://www.genecards.org/cgi-bin/carddisp.pl?gene=RARB
MAP3K5	Mitogen-Activated Protein Kinase Kinase Kinase 5	Protein Coding	Q99683	61	GC06M136557	19.1359	https://www.genecards.org/cgi-bin/carddisp.pl?gene=MAP3K5
SPINK1	Serine Peptidase Inhibitor Kazal Type 1	Protein Coding	P00995	55	GC05M147825	18.6614	https://www.genecards.org/cgi-bin/carddisp.pl?gene=SPINK1
CXCL9	C-X-C Motif Chemokine Ligand 9	Protein Coding	Q07325	52	GC04M076001	18.0817	https://www.genecards.org/cgi-bin/carddisp.pl?gene=CXCL9
CHI3L1	Chitinase 3 Like 1	Protein Coding	P36222	58	GC01M203148	18.0607	https://www.genecards.org/cgi-bin/carddisp.pl?gene=CHI3L1
CXCR3	C-X-C Motif Chemokine Receptor 3	Protein Coding	P49682	57	GC0XM071615	17.8307	https://www.genecards.org/cgi-bin/carddisp.pl?gene=CXCR3
MIR511	MicroRNA 511	RNA Gene		25	GC10P017845	17.5095	https://www.genecards.org/cgi-bin/carddisp.pl?gene=MIR511
HTR2A	5-Hydroxytryptamine Receptor 2A	Protein Coding	P28223	60	GC13M046831	17.4945	https://www.genecards.org/cgi-bin/carddisp.pl?gene=HTR2A
WDPCP	WD Repeat Containing Planar Cell Polarity Effector	Protein Coding	O95876	50	GC02M063121	17.3461	https://www.genecards.org/cgi-bin/carddisp.pl?gene=WDPCP
GNAO1	G Protein Subunit Alpha O1	Protein Coding	P09471	59	GC16P097311	16.9666	https://www.genecards.org/cgi-bin/carddisp.pl?gene=GNAO1
GRIN2B	Glutamate Ionotropic Receptor NMDA Type Subunit 2B	Protein Coding	Q13224	65	GC12M013437	16.8523	https://www.genecards.org/cgi-bin/carddisp.pl?gene=GRIN2B
XPA	XPA, DNA Damage Recognition And Repair Factor	Protein Coding	P23025	58	GC09M097654	16.6784	https://www.genecards.org/cgi-bin/carddisp.pl?gene=XPA
BCYRN1	Brain Cytoplasmic RNA 1	RNA Gene		28	GC02P047253	16.5239	https://www.genecards.org/cgi-bin/carddisp.pl?gene=BCYRN1
BRD4	Bromodomain Containing 4	Protein Coding	O60885	60	GC19M096358	16.4937	https://www.genecards.org/cgi-bin/carddisp.pl?gene=BRD4
FGF21	Fibroblast Growth Factor 21	Protein Coding	Q9NSA1	51	GC19P123383	16.4794	https://www.genecards.org/cgi-bin/carddisp.pl?gene=FGF21
MB	Myoglobin	Protein Coding	P02144	58	GC22M035606	16.4355	https://www.genecards.org/cgi-bin/carddisp.pl?gene=MB
MBOAT7	Membrane Bound O-Acyltransferase Domain Containing 7	Protein Coding	Q96N66	52	GC19M054173	16.3301	https://www.genecards.org/cgi-bin/carddisp.pl?gene=MBOAT7
SCD	Stearoyl-CoA Desaturase	Protein Coding	O00767	63	GC10P100347	16.1046	https://www.genecards.org/cgi-bin/carddisp.pl?gene=SCD
ANO1	Anoctamin 1	Protein Coding	Q5XXA6	58	GC11P094922	15.3292	https://www.genecards.org/cgi-bin/carddisp.pl?gene=ANO1
TRA-TGC7-1	TRNA-Ala (Anticodon TGC) 7-1	RNA Gene		15	GC06M096896	15.0368	https://www.genecards.org/cgi-bin/carddisp.pl?gene=TRA-TGC7-1
ADNP	Activity Dependent Neuroprotector Homeobox	Protein Coding	Q9H2P0	56	GC20M050888	14.8762	https://www.genecards.org/cgi-bin/carddisp.pl?gene=ADNP
MIR99B	MicroRNA 99b	RNA Gene		29	GC19P051692	14.7856	https://www.genecards.org/cgi-bin/carddisp.pl?gene=MIR99B
SLC1A2	Solute Carrier Family 1 Member 2	Protein Coding	P43004	63	GC11M035267	14.7834	https://www.genecards.org/cgi-bin/carddisp.pl?gene=SLC1A2
PRSS1	Serine Protease 1	Protein Coding	P07477	57	GC07P159683	14.6811	https://www.genecards.org/cgi-bin/carddisp.pl?gene=PRSS1
PDYN	Prodynorphin	Protein Coding	P01213	58	GC20M001978	14.6592	https://www.genecards.org/cgi-bin/carddisp.pl?gene=PDYN
CCL4	C-C Motif Chemokine Ligand 4	Protein Coding	P13236	53	GC17P036103	14.6521	https://www.genecards.org/cgi-bin/carddisp.pl?gene=CCL4
MIR100	MicroRNA 100	RNA Gene		30	GC11M122152	14.5742	https://www.genecards.org/cgi-bin/carddisp.pl?gene=MIR100
PIGR	Polymeric Immunoglobulin Receptor	Protein Coding	P01833	54	GC01M206928	14.4647	https://www.genecards.org/cgi-bin/carddisp.pl?gene=PIGR
ROBO1	Roundabout Guidance Receptor 1	Protein Coding	Q9Y6N7	58	GC03M078597	13.0796	https://www.genecards.org/cgi-bin/carddisp.pl?gene=ROBO1
ALDH9A1	Aldehyde Dehydrogenase 9 Family Member A1	Protein Coding	P49189	54	GC01M165689	12.86	https://www.genecards.org/cgi-bin/carddisp.pl?gene=ALDH9A1
AKR1B1	Aldo-Keto Reductase Family 1 Member B	Protein Coding	P15121	59	GC07M134442	12.807	https://www.genecards.org/cgi-bin/carddisp.pl?gene=AKR1B1
RAD51D	RAD51 Paralog D	Protein Coding	O75771	53	GC17M035092	12.4663	https://www.genecards.org/cgi-bin/carddisp.pl?gene=RAD51D
TXNIP	Thioredoxin Interacting Protein	Protein Coding	Q9H3M7	52	GC01M145992	12.3905	https://www.genecards.org/cgi-bin/carddisp.pl?gene=TXNIP
GABRB3	Gamma-Aminobutyric Acid Type A Receptor Subunit Beta3	Protein Coding	P28472	61	GC15M026543	11.8603	https://www.genecards.org/cgi-bin/carddisp.pl?gene=GABRB3
AKR1C4	Aldo-Keto Reductase Family 1 Member C4	Protein Coding	P17516	58	GC10P005195	11.7199	https://www.genecards.org/cgi-bin/carddisp.pl?gene=AKR1C4
ACP1	Acid Phosphatase 1	Protein Coding	P24666	55	GC02P000934	11.7037	https://www.genecards.org/cgi-bin/carddisp.pl?gene=ACP1
ARID2	AT-Rich Interaction Domain 2	Protein Coding	Q68CP9	54	GC12P045729	11.6927	https://www.genecards.org/cgi-bin/carddisp.pl?gene=ARID2
TPH1	Tryptophan Hydroxylase 1	Protein Coding	P17752	58	GC11M018040	11.0582	https://www.genecards.org/cgi-bin/carddisp.pl?gene=TPH1
CXCL11	C-X-C Motif Chemokine Ligand 11	Protein Coding	O14625	52	GC04M076033	10.9639	https://www.genecards.org/cgi-bin/carddisp.pl?gene=CXCL11
FKBP5	FKBP Prolyl Isomerase 5	Protein Coding	Q13451	62	GC06M097251	10.9307	https://www.genecards.org/cgi-bin/carddisp.pl?gene=FKBP5
TRC-GCA24-1	TRNA-Cys (GCA) 24-1	RNA Gene		14	GC17M085080	10.8624	https://www.genecards.org/cgi-bin/carddisp.pl?gene=TRC-GCA24-1
GRP	Gastrin Releasing Peptide	Protein Coding	P07492	53	GC18P059220	10.7791	https://www.genecards.org/cgi-bin/carddisp.pl?gene=GRP
GNAI1	G Protein Subunit Alpha I1	Protein Coding	P63096	60	GC07P088666	10.7073	https://www.genecards.org/cgi-bin/carddisp.pl?gene=GNAI1
LAG3	Lymphocyte Activating 3	Protein Coding	P18627	53	GC12P042113	10.5001	https://www.genecards.org/cgi-bin/carddisp.pl?gene=LAG3
MLKL	Mixed Lineage Kinase Domain Like Pseudokinase	Protein Coding	Q8NB16	55	GC16M074854	10.4973	https://www.genecards.org/cgi-bin/carddisp.pl?gene=MLKL
RIPK3	Receptor Interacting Serine/Threonine Kinase 3	Protein Coding	Q9Y572	56	GC14M024336	10.4835	https://www.genecards.org/cgi-bin/carddisp.pl?gene=RIPK3
ADH1A	Alcohol Dehydrogenase 1A (Class I), Alpha Polypeptide	Protein Coding	P07327	55	GC04M099276	10.2713	https://www.genecards.org/cgi-bin/carddisp.pl?gene=ADH1A
GABRB2	Gamma-Aminobutyric Acid Type A Receptor Subunit Beta2	Protein Coding	P47870	60	GC05M161288	10.2134	https://www.genecards.org/cgi-bin/carddisp.pl?gene=GABRB2
HTR2C	5-Hydroxytryptamine Receptor 2C	Protein Coding	P28335	58	GC0XP114584	10.1928	https://www.genecards.org/cgi-bin/carddisp.pl?gene=HTR2C
HTR3A	5-Hydroxytryptamine Receptor 3A	Protein Coding	P46098	58	GC11P113975	9.5905	https://www.genecards.org/cgi-bin/carddisp.pl?gene=HTR3A
RNU6-1	RNA, U6 Small Nuclear 1	RNA Gene		24	GC15M067839	9.58372	https://www.genecards.org/cgi-bin/carddisp.pl?gene=RNU6-1
LOC110806262	Solute Carrier Family 6 Member 4 Gene Promoter	Functional Element		8	GC17P030235	9.33496	https://www.genecards.org/cgi-bin/carddisp.pl?gene=LOC110806262
BRF1	BRF1 RNA Polymerase III Transcription Initiation Factor Subunit	Protein Coding	Q92994	54	GC14M121117	9.33206	https://www.genecards.org/cgi-bin/carddisp.pl?gene=BRF1
TRPV6	Transient Receptor Potential Cation Channel Subfamily V Member 6	Protein Coding	Q9H1D0	59	GC07M142871	9.25319	https://www.genecards.org/cgi-bin/carddisp.pl?gene=TRPV6
GABRA2	Gamma-Aminobutyric Acid Type A Receptor Subunit Alpha2	Protein Coding	P47869	59	GC04M046243	9.11261	https://www.genecards.org/cgi-bin/carddisp.pl?gene=GABRA2
CLDN2	Claudin 2	Protein Coding	P57739	53	GC0XP106900	9.01867	https://www.genecards.org/cgi-bin/carddisp.pl?gene=CLDN2
NECAP2	NECAP Endocytosis Associated 2	Protein Coding	Q9NVZ3	50	GC01P051621	8.97142	https://www.genecards.org/cgi-bin/carddisp.pl?gene=NECAP2
AKR1C1	Aldo-Keto Reductase Family 1 Member C1	Protein Coding	Q04828	56	GC10P004963	8.95168	https://www.genecards.org/cgi-bin/carddisp.pl?gene=AKR1C1
GPAM	Glycerol-3-Phosphate Acyltransferase, Mitochondrial	Protein Coding	Q9HCL2	54	GC10M112148	8.8419	https://www.genecards.org/cgi-bin/carddisp.pl?gene=GPAM
PRSS2	Serine Protease 2	Protein Coding	P07478	55	GC07P159696	8.16749	https://www.genecards.org/cgi-bin/carddisp.pl?gene=PRSS2
ALDH3A1	Aldehyde Dehydrogenase 3 Family Member A1	Protein Coding	P30838	59	GC17M019737	7.52973	https://www.genecards.org/cgi-bin/carddisp.pl?gene=ALDH3A1
SLC7A11	Solute Carrier Family 7 Member 11	Protein Coding	Q9UPY5	56	GC04M138164	7.38707	https://www.genecards.org/cgi-bin/carddisp.pl?gene=SLC7A11
PAX9	Paired Box 9	Protein Coding	P55771	56	GC14P036657	7.11357	https://www.genecards.org/cgi-bin/carddisp.pl?gene=PAX9
ELK1	ETS Transcription Factor ELK1	Protein Coding	P19419	58	GC0XM047635	7.0539	https://www.genecards.org/cgi-bin/carddisp.pl?gene=ELK1
CNTN4	Contactin 4	Protein Coding	Q8IWV2	54	GC03P002117	7.01721	https://www.genecards.org/cgi-bin/carddisp.pl?gene=CNTN4
KLRB1	Killer Cell Lectin Like Receptor B1	Protein Coding	Q12918	50	GC12M030825	6.69428	https://www.genecards.org/cgi-bin/carddisp.pl?gene=KLRB1
RAD51L3-RFFL	RAD51L3-RFFL Readthrough	RNA Gene		18	GC17M035009	6.62655	https://www.genecards.org/cgi-bin/carddisp.pl?gene=RAD51L3-RFFL
AKR7A2	Aldo-Keto Reductase Family 7 Member A2	Protein Coding	O43488	49	GC01M019302	6.55723	https://www.genecards.org/cgi-bin/carddisp.pl?gene=AKR7A2
SRPK2	SRSF Protein Kinase 2	Protein Coding	P78362	55	GC07M105110	6.40356	https://www.genecards.org/cgi-bin/carddisp.pl?gene=SRPK2
ADH7	Alcohol Dehydrogenase 7 (Class IV), Mu Or Sigma Polypeptide	Protein Coding	P40394	54	GC04M099412	6.25701	https://www.genecards.org/cgi-bin/carddisp.pl?gene=ADH7
LUCAT1	Lung Cancer Associated Transcript 1	RNA Gene		24	GC05M091054	6.15492	https://www.genecards.org/cgi-bin/carddisp.pl?gene=LUCAT1
RPS8	Ribosomal Protein S8	Protein Coding	P62241	47	GC01P044775	6.10038	https://www.genecards.org/cgi-bin/carddisp.pl?gene=RPS8
GRPR	Gastrin Releasing Peptide Receptor	Protein Coding	P30550	56	GC0XP016124	6.07434	https://www.genecards.org/cgi-bin/carddisp.pl?gene=GRPR
LINC01587	Long Intergenic Non-Protein Coding RNA 1587	RNA Gene	Q99440	28	GC04P005524	6.00714	https://www.genecards.org/cgi-bin/carddisp.pl?gene=LINC01587
ADH6	Alcohol Dehydrogenase 6 (Class V)	Protein Coding	P28332	51	GC04M099202	5.89465	https://www.genecards.org/cgi-bin/carddisp.pl?gene=ADH6
SLIT2	Slit Guidance Ligand 2	Protein Coding	O94813	59	GC04P025805	5.61543	https://www.genecards.org/cgi-bin/carddisp.pl?gene=SLIT2
USP22	Ubiquitin Specific Peptidase 22	Protein Coding	Q9UPT9	51	GC17M020999	5.4478	https://www.genecards.org/cgi-bin/carddisp.pl?gene=USP22
ZNF827	Zinc Finger Protein 827	Protein Coding	Q17R98	38	GC04M145757	5.44045	https://www.genecards.org/cgi-bin/carddisp.pl?gene=ZNF827
OPRK1	Opioid Receptor Kappa 1	Protein Coding	P41145	53	GC08M053227	5.42406	https://www.genecards.org/cgi-bin/carddisp.pl?gene=OPRK1
PRMT6	Protein Arginine Methyltransferase 6	Protein Coding	Q96LA8	53	GC01P107056	4.5053	https://www.genecards.org/cgi-bin/carddisp.pl?gene=PRMT6
CERS6	Ceramide Synthase 6	Protein Coding	Q6ZMG9	49	GC02P168472	4.44728	https://www.genecards.org/cgi-bin/carddisp.pl?gene=CERS6
FFAR3	Free Fatty Acid Receptor 3	Protein Coding	O14843	47	GC19P124080	4.38342	https://www.genecards.org/cgi-bin/carddisp.pl?gene=FFAR3
FFAR2	Free Fatty Acid Receptor 2	Protein Coding	O15552	54	GC19P122924	4.04969	https://www.genecards.org/cgi-bin/carddisp.pl?gene=FFAR2
ANKK1	Ankyrin Repeat And Kinase Domain Containing 1	Protein Coding	Q8NFD2	48	GC11P113387	4.01797	https://www.genecards.org/cgi-bin/carddisp.pl?gene=ANKK1
MIR3178	MicroRNA 3178	RNA Gene		15	GC16M002531	3.86553	https://www.genecards.org/cgi-bin/carddisp.pl?gene=MIR3178
DPPA4	Developmental Pluripotency Associated 4	Protein Coding	Q7L190	50	GC03M109326	2.96358	https://www.genecards.org/cgi-bin/carddisp.pl?gene=DPPA4
GGT3P	Gamma-Glutamyltransferase 3 Pseudogene	Pseudogene	A6NGU5	24	GC22M018773	2.71407	https://www.genecards.org/cgi-bin/carddisp.pl?gene=GGT3P
MIR153-2	MicroRNA 153-2	RNA Gene		19	GC07M157574	2.38635	https://www.genecards.org/cgi-bin/carddisp.pl?gene=MIR153-2
MORC4	MORC Family CW-Type Zinc Finger 4	Protein Coding	Q8TE76	42	GC0XM106813	2.38115	https://www.genecards.org/cgi-bin/carddisp.pl?gene=MORC4
SARAF	Store-Operated Calcium Entry Associated Regulatory Factor	Protein Coding	Q96BY9	43	GC08M030063	2.30607	https://www.genecards.org/cgi-bin/carddisp.pl?gene=SARAF
LOC126807122	P300/CBP Strongly-Dependent Group 1 Enhancer GRCh37_chr4:100238861-100240060	Functional Element		5	GC04P099317	2.2676	https://www.genecards.org/cgi-bin/carddisp.pl?gene=LOC126807122
LOC111216273	ADH1B Promoter	Functional Element		2	GC04P099321	2.1671	https://www.genecards.org/cgi-bin/carddisp.pl?gene=LOC111216273
MIR4785	MicroRNA 4785	RNA Gene		14	GC02M160408	1.92309	https://www.genecards.org/cgi-bin/carddisp.pl?gene=MIR4785
LOC111216272	ADH1A Promoter	Functional Element		2	GC04P099290	1.80821	https://www.genecards.org/cgi-bin/carddisp.pl?gene=LOC111216272
TESPA1	Thymocyte Expressed, Positive Selection Associated 1	Protein Coding	A2RU30	44	GC12M059474	1.14933	https://www.genecards.org/cgi-bin/carddisp.pl?gene=TESPA1
MIR4519	MicroRNA 4519	RNA Gene		13	GC16M044968	0.792827	https://www.genecards.org/cgi-bin/carddisp.pl?gene=MIR4519
LOC111216291	ADH6 Promoter	Functional Element		2	GC04P099219	0.535616	https://www.genecards.org/cgi-bin/carddisp.pl?gene=LOC111216291
CYP2E1	Cytochrome P450 Family 2 Subfamily E Member 1	Protein Coding	P05181	59	GC10P133520	10.7208	https://www.genecards.org/cgi-bin/carddisp.pl?gene=CYP2E1
TNF	Tumor Necrosis Factor	Protein Coding	P01375	65	GC06P144764	8.62234	https://www.genecards.org/cgi-bin/carddisp.pl?gene=TNF
ALDH2	Aldehyde Dehydrogenase 2 Family Member	Protein Coding	P05091	64	GC12P111766	7.87988	https://www.genecards.org/cgi-bin/carddisp.pl?gene=ALDH2
ADH1B	Alcohol Dehydrogenase 1B (Class I), Beta Polypeptide	Protein Coding	P00325	58	GC04M099304	7.17853	https://www.genecards.org/cgi-bin/carddisp.pl?gene=ADH1B
F2	Coagulation Factor II, Thrombin	Protein Coding	P00734	63	GC11P048054	7.09609	https://www.genecards.org/cgi-bin/carddisp.pl?gene=F2
ADH1C	Alcohol Dehydrogenase 1C (Class I), Gamma Polypeptide	Protein Coding	P00326	54	GC04M099336	6.889	https://www.genecards.org/cgi-bin/carddisp.pl?gene=ADH1C
PNPLA3	Patatin Like Phospholipase Domain Containing 3	Protein Coding	Q9NST1	55	GC22P043923	6.44124	https://www.genecards.org/cgi-bin/carddisp.pl?gene=PNPLA3
IL10	Interleukin 10	Protein Coding	P22301	60	GC01M206767	6.21453	https://www.genecards.org/cgi-bin/carddisp.pl?gene=IL10
SLC17A5	Solute Carrier Family 17 Member 5	Protein Coding	Q9NRA2	58	GC06M073593	6.05476	https://www.genecards.org/cgi-bin/carddisp.pl?gene=SLC17A5
HFE	Homeostatic Iron Regulator	Protein Coding	Q30201	58	GC06P026087	6.04305	https://www.genecards.org/cgi-bin/carddisp.pl?gene=HFE
CD14	CD14 Molecule	Protein Coding	P08571	59	GC05M140631	5.81384	https://www.genecards.org/cgi-bin/carddisp.pl?gene=CD14
ALB	Albumin	Protein Coding	P02768	62	GC04P073397	5.59635	https://www.genecards.org/cgi-bin/carddisp.pl?gene=ALB
CXCL8	C-X-C Motif Chemokine Ligand 8	Protein Coding	P10145	56	GC04P073740	5.5868	https://www.genecards.org/cgi-bin/carddisp.pl?gene=CXCL8
GPT	Glutamic--Pyruvic Transaminase	Protein Coding	P24298	55	GC08P144502	5.39984	https://www.genecards.org/cgi-bin/carddisp.pl?gene=GPT
TGFB1	Transforming Growth Factor Beta 1	Protein Coding	P01137	66	GC19M041301	4.78706	https://www.genecards.org/cgi-bin/carddisp.pl?gene=TGFB1
GGT1	Gamma-Glutamyltransferase 1	Protein Coding	P19440	62	GC22P024583	4.75538	https://www.genecards.org/cgi-bin/carddisp.pl?gene=GGT1
SOD2-OT1	SOD2 Overlapping Transcript 1	RNA Gene		21	GC06M159772	4.66146	https://www.genecards.org/cgi-bin/carddisp.pl?gene=SOD2-OT1
AKR1A1	Aldo-Keto Reductase Family 1 Member A1	Protein Coding	P14550	56	GC01P045550	4.6025	https://www.genecards.org/cgi-bin/carddisp.pl?gene=AKR1A1
GSTP1	Glutathione S-Transferase Pi 1	Protein Coding	P09211	63	GC11P067583	4.41826	https://www.genecards.org/cgi-bin/carddisp.pl?gene=GSTP1
GSTM1	Glutathione S-Transferase Mu 1	Protein Coding	P09488	55	GC01P109687	4.28258	https://www.genecards.org/cgi-bin/carddisp.pl?gene=GSTM1
SOD1	Superoxide Dismutase 1	Protein Coding	P00441	66	GC21P031659	4.20071	https://www.genecards.org/cgi-bin/carddisp.pl?gene=SOD1
SOD2	Superoxide Dismutase 2	Protein Coding	P04179	60	GC06M159669	4.20071	https://www.genecards.org/cgi-bin/carddisp.pl?gene=SOD2
ADIPOQ	Adiponectin, C1Q And Collagen Domain Containing	Protein Coding	Q15848	59	GC03P186842	4.04295	https://www.genecards.org/cgi-bin/carddisp.pl?gene=ADIPOQ
IL6	Interleukin 6	Protein Coding	P05231	64	GC07P022725	3.99845	https://www.genecards.org/cgi-bin/carddisp.pl?gene=IL6
GSTT1	Glutathione S-Transferase Theta 1	Protein Coding	P30711	44	GC22Mi00270	3.91659	https://www.genecards.org/cgi-bin/carddisp.pl?gene=GSTT1
MTR	5-Methyltetrahydrofolate-Homocysteine Methyltransferase	Protein Coding	Q99707	60	GC01P236795	3.76558	https://www.genecards.org/cgi-bin/carddisp.pl?gene=MTR
CTLA4	Cytotoxic T-Lymphocyte Associated Protein 4	Protein Coding	P16410	61	GC02P204076	3.6709	https://www.genecards.org/cgi-bin/carddisp.pl?gene=CTLA4
HAMP	Hepcidin Antimicrobial Peptide	Protein Coding	P81172	56	GC19P122921	3.36602	https://www.genecards.org/cgi-bin/carddisp.pl?gene=HAMP
TF	Transferrin	Protein Coding	P02787	64	GC03P140082	3.15588	https://www.genecards.org/cgi-bin/carddisp.pl?gene=TF
IL4	Interleukin 4	Protein Coding	P05112	59	GC05P132673	3.15335	https://www.genecards.org/cgi-bin/carddisp.pl?gene=IL4
PRMT7	Protein Arginine Methyltransferase 7	Protein Coding	Q9NVM4	56	GC16P097697	3.0826	https://www.genecards.org/cgi-bin/carddisp.pl?gene=PRMT7
YARS1	Tyrosyl-TRNA Synthetase 1	Protein Coding	P54577	56	GC01M032776	3.0826	https://www.genecards.org/cgi-bin/carddisp.pl?gene=YARS1
MALAT1	Metastasis Associated Lung Adenocarcinoma Transcript 1	RNA Gene		33	GC11P094626	3.0826	https://www.genecards.org/cgi-bin/carddisp.pl?gene=MALAT1
LOC126805688	BRD4-Independent Group 4 Enhancer GRCh37_chr1:33251929-33253128	Functional Element		6	GC01P032786	3.0826	https://www.genecards.org/cgi-bin/carddisp.pl?gene=LOC126805688
CCL2	C-C Motif Chemokine Ligand 2	Protein Coding	P13500	62	GC17P034255	3.05551	https://www.genecards.org/cgi-bin/carddisp.pl?gene=CCL2
PPARA	Peroxisome Proliferator Activated Receptor Alpha	Protein Coding	Q07869	58	GC22P046150	2.97866	https://www.genecards.org/cgi-bin/carddisp.pl?gene=PPARA
CD79A	CD79a Molecule	Protein Coding	P11912	60	GC19P041877	2.93005	https://www.genecards.org/cgi-bin/carddisp.pl?gene=CD79A
IL17A	Interleukin 17A	Protein Coding	Q16552	56	GC06P052186	2.90432	https://www.genecards.org/cgi-bin/carddisp.pl?gene=IL17A
MT-TP	Mitochondrially Encoded TRNA-Pro (CCN)	RNA Gene		17	GCMTM015957	2.82245	https://www.genecards.org/cgi-bin/carddisp.pl?gene=MT-TP
GSTM3	Glutathione S-Transferase Mu 3	Protein Coding	P21266	58	GC01M109733	2.79663	https://www.genecards.org/cgi-bin/carddisp.pl?gene=GSTM3
LEP	Leptin	Protein Coding	P41159	59	GC07P128241	2.68413	https://www.genecards.org/cgi-bin/carddisp.pl?gene=LEP
SHBG	Sex Hormone Binding Globulin	Protein Coding	P04278	55	GC17P007613	2.68413	https://www.genecards.org/cgi-bin/carddisp.pl?gene=SHBG
MAT1A	Methionine Adenosyltransferase 1A	Protein Coding	Q00266	59	GC10M080271	2.63237	https://www.genecards.org/cgi-bin/carddisp.pl?gene=MAT1A
KRT19	Keratin 19	Protein Coding	P08727	58	GC17M041523	2.63237	https://www.genecards.org/cgi-bin/carddisp.pl?gene=KRT19
LINC02605	Long Intergenic Non-Protein Coding RNA 2605	RNA Gene		22	GC08P078838	2.63237	https://www.genecards.org/cgi-bin/carddisp.pl?gene=LINC02605
CAT	Catalase	Protein Coding	P04040	64	GC11P034460	2.57676	https://www.genecards.org/cgi-bin/carddisp.pl?gene=CAT
IL1RN	Interleukin 1 Receptor Antagonist	Protein Coding	P18510	63	GC02P146140	2.57676	https://www.genecards.org/cgi-bin/carddisp.pl?gene=IL1RN
IGF1	Insulin Like Growth Factor 1	Protein Coding	P05019	61	GC12M102395	2.51629	https://www.genecards.org/cgi-bin/carddisp.pl?gene=IGF1
SERPINE1	Serpin Family E Member 1	Protein Coding	P05121	64	GC07P101127	2.44941	https://www.genecards.org/cgi-bin/carddisp.pl?gene=SERPINE1
PDE4B	Phosphodiesterase 4B	Protein Coding	Q07343	58	GC01P065792	2.44941	https://www.genecards.org/cgi-bin/carddisp.pl?gene=PDE4B
LINC01672	Long Intergenic Non-Protein Coding RNA 1672	RNA Gene		21	GC01P050860	2.44941	https://www.genecards.org/cgi-bin/carddisp.pl?gene=LINC01672
PTPRC	Protein Tyrosine Phosphatase Receptor Type C	Protein Coding	P08575	65	GC01P198607	2.41199	https://www.genecards.org/cgi-bin/carddisp.pl?gene=PTPRC
TNFRSF1B	TNF Receptor Superfamily Member 1B	Protein Coding	P20333	61	GC01P051309	2.37349	https://www.genecards.org/cgi-bin/carddisp.pl?gene=TNFRSF1B
CRP	C-Reactive Protein	Protein Coding	P02741	59	GC01M164127	2.37349	https://www.genecards.org/cgi-bin/carddisp.pl?gene=CRP
TIMP1	TIMP Metallopeptidase Inhibitor 1	Protein Coding	P01033	58	GC0XP058331	2.37349	https://www.genecards.org/cgi-bin/carddisp.pl?gene=TIMP1
TJP1	Tight Junction Protein 1	Protein Coding	Q07157	58	GC15M029699	2.37349	https://www.genecards.org/cgi-bin/carddisp.pl?gene=TJP1
NAT2	N-Acetyltransferase 2	Protein Coding	P11245	56	GC08P018391	2.37349	https://www.genecards.org/cgi-bin/carddisp.pl?gene=NAT2
ALDH9A1	Aldehyde Dehydrogenase 9 Family Member A1	Protein Coding	P49189	54	GC01M165689	2.35288	https://www.genecards.org/cgi-bin/carddisp.pl?gene=ALDH9A1
IL12B	Interleukin 12B	Protein Coding	P29460	58	GC05M159314	2.30587	https://www.genecards.org/cgi-bin/carddisp.pl?gene=IL12B
HMGB1	High Mobility Group Box 1	Protein Coding	P09429	62	GC13M030456	2.28343	https://www.genecards.org/cgi-bin/carddisp.pl?gene=HMGB1
PLG	Plasminogen	Protein Coding	P00747	62	GC06P160702	2.28343	https://www.genecards.org/cgi-bin/carddisp.pl?gene=PLG
ANXA2	Annexin A2	Protein Coding	P07355	60	GC15M060347	2.28343	https://www.genecards.org/cgi-bin/carddisp.pl?gene=ANXA2
SPP1	Secreted Phosphoprotein 1	Protein Coding	P10451	57	GC04P087975	2.28343	https://www.genecards.org/cgi-bin/carddisp.pl?gene=SPP1
GSTA1	Glutathione S-Transferase Alpha 1	Protein Coding	P08263	54	GC06M052791	2.28343	https://www.genecards.org/cgi-bin/carddisp.pl?gene=GSTA1
MEG3	Maternally Expressed 3	RNA Gene		37	GC14P117888	2.28343	https://www.genecards.org/cgi-bin/carddisp.pl?gene=MEG3
KRT18	Keratin 18	Protein Coding	P05783	63	GC12P052948	2.27101	https://www.genecards.org/cgi-bin/carddisp.pl?gene=KRT18
MTHFR	Methylenetetrahydrofolate Reductase	Protein Coding	P42898	61	GC01M011785	2.1813	https://www.genecards.org/cgi-bin/carddisp.pl?gene=MTHFR
SEPSECS	Sep (O-Phosphoserine) TRNA:Sec (Selenocysteine) TRNA Synthase	Protein Coding	Q9HD40	56	GC04M025121	2.1813	https://www.genecards.org/cgi-bin/carddisp.pl?gene=SEPSECS
PLAT	Plasminogen Activator, Tissue Type	Protein Coding	P00750	62	GC08M042174	2.16607	https://www.genecards.org/cgi-bin/carddisp.pl?gene=PLAT
B2M	Beta-2-Microglobulin	Protein Coding	P61769	63	GC15P044711	2.13269	https://www.genecards.org/cgi-bin/carddisp.pl?gene=B2M
IL2RA	Interleukin 2 Receptor Subunit Alpha	Protein Coding	P01589	63	GC10M006010	2.13269	https://www.genecards.org/cgi-bin/carddisp.pl?gene=IL2RA
ICAM1	Intercellular Adhesion Molecule 1	Protein Coding	P05362	63	GC19P122290	2.11019	https://www.genecards.org/cgi-bin/carddisp.pl?gene=ICAM1
RPS27A	Ribosomal Protein S27a	Protein Coding	P62979	55	GC02P055231	2.08093	https://www.genecards.org/cgi-bin/carddisp.pl?gene=RPS27A
IL17RA	Interleukin 17 Receptor A	Protein Coding	Q96F46	60	GC22P075288	2.02532	https://www.genecards.org/cgi-bin/carddisp.pl?gene=IL17RA
IGHE	Immunoglobulin Heavy Constant Epsilon	Protein Coding	P01854	42	GC14M121124	2.02532	https://www.genecards.org/cgi-bin/carddisp.pl?gene=IGHE
LBP	Lipopolysaccharide Binding Protein	Protein Coding	P18428	56	GC20P038346	1.96485	https://www.genecards.org/cgi-bin/carddisp.pl?gene=LBP
RETN	Resistin	Protein Coding	Q9HD89	55	GC19P007669	1.96485	https://www.genecards.org/cgi-bin/carddisp.pl?gene=RETN
TLR4	Toll Like Receptor 4	Protein Coding	O00206	64	GC09P117704	1.89797	https://www.genecards.org/cgi-bin/carddisp.pl?gene=TLR4
FN1	Fibronectin 1	Protein Coding	P02751	63	GC02M215360	1.89797	https://www.genecards.org/cgi-bin/carddisp.pl?gene=FN1
MMP1	Matrix Metallopeptidase 1	Protein Coding	P03956	63	GC11M129720	1.89797	https://www.genecards.org/cgi-bin/carddisp.pl?gene=MMP1
TFRC	Transferrin Receptor	Protein Coding	P02786	63	GC03M196520	1.89797	https://www.genecards.org/cgi-bin/carddisp.pl?gene=TFRC
F13A1	Coagulation Factor XIII A Chain	Protein Coding	P00488	60	GC06M006144	1.89797	https://www.genecards.org/cgi-bin/carddisp.pl?gene=F13A1
CCL3	C-C Motif Chemokine Ligand 3	Protein Coding	P10147	54	GC17M036088	1.89797	https://www.genecards.org/cgi-bin/carddisp.pl?gene=CCL3
HPX	Hemopexin	Protein Coding	P02790	54	GC11M012777	1.89797	https://www.genecards.org/cgi-bin/carddisp.pl?gene=HPX
HSD17B13	Hydroxysteroid 17-Beta Dehydrogenase 13	Protein Coding	Q7Z5P4	51	GC04M087303	1.89797	https://www.genecards.org/cgi-bin/carddisp.pl?gene=HSD17B13
H19	H19 Imprinted Maternally Expressed Transcript	RNA Gene		36	GC11M001995	1.89797	https://www.genecards.org/cgi-bin/carddisp.pl?gene=H19
HSP90AA1	Heat Shock Protein 90 Alpha Family Class A Member 1	Protein Coding	P07900	64	GC14M102080	1.88274	https://www.genecards.org/cgi-bin/carddisp.pl?gene=HSP90AA1
MMP3	Matrix Metallopeptidase 3	Protein Coding	P08254	63	GC11M102835	1.88274	https://www.genecards.org/cgi-bin/carddisp.pl?gene=MMP3
AKT1	AKT Serine/Threonine Kinase 1	Protein Coding	P31749	66	GC14M104769	1.82205	https://www.genecards.org/cgi-bin/carddisp.pl?gene=AKT1
HMOX1	Heme Oxygenase 1	Protein Coding	P09601	65	GC22P035380	1.82205	https://www.genecards.org/cgi-bin/carddisp.pl?gene=HMOX1
NFE2L2	NFE2 Like BZIP Transcription Factor 2	Protein Coding	Q16236	64	GC02M177227	1.82205	https://www.genecards.org/cgi-bin/carddisp.pl?gene=NFE2L2
AHCY	Adenosylhomocysteinase	Protein Coding	P23526	62	GC20M035863	1.82205	https://www.genecards.org/cgi-bin/carddisp.pl?gene=AHCY
HIF1A	Hypoxia Inducible Factor 1 Subunit Alpha	Protein Coding	Q16665	62	GC14P061695	1.82205	https://www.genecards.org/cgi-bin/carddisp.pl?gene=HIF1A
SIRT1	Sirtuin 1	Protein Coding	Q96EB6	62	GC10P067884	1.82205	https://www.genecards.org/cgi-bin/carddisp.pl?gene=SIRT1
TNFSF11	TNF Superfamily Member 11	Protein Coding	O14788	62	GC13P042562	1.82205	https://www.genecards.org/cgi-bin/carddisp.pl?gene=TNFSF11
DDIT3	DNA Damage Inducible Transcript 3	Protein Coding	P35638	60	GC12M057516	1.82205	https://www.genecards.org/cgi-bin/carddisp.pl?gene=DDIT3
TNFRSF11B	TNF Receptor Superfamily Member 11b	Protein Coding	O00300	60	GC08M118923	1.82205	https://www.genecards.org/cgi-bin/carddisp.pl?gene=TNFRSF11B
GNMT	Glycine N-Methyltransferase	Protein Coding	Q14749	57	GC06P042960	1.82205	https://www.genecards.org/cgi-bin/carddisp.pl?gene=GNMT
KRT7	Keratin 7	Protein Coding	P08729	56	GC12P052232	1.82205	https://www.genecards.org/cgi-bin/carddisp.pl?gene=KRT7
LTA	Lymphotoxin Alpha	Protein Coding	P01374	55	GC06P144762	1.82205	https://www.genecards.org/cgi-bin/carddisp.pl?gene=LTA
BGLAP	Bone Gamma-Carboxyglutamate Protein	Protein Coding	P02818	53	GC01P156242	1.82205	https://www.genecards.org/cgi-bin/carddisp.pl?gene=BGLAP
SIGLEC7	Sialic Acid Binding Ig Like Lectin 7	Protein Coding	Q9Y286	51	GC19P051142	1.82205	https://www.genecards.org/cgi-bin/carddisp.pl?gene=SIGLEC7
BDNF-AS	BDNF Antisense RNA	RNA Gene		31	GC11P027466	1.82205	https://www.genecards.org/cgi-bin/carddisp.pl?gene=BDNF-AS
LEPQTL1	Leptin, Serum Levels Of	Genetic Locus		11	GC02U903086	1.82205	https://www.genecards.org/cgi-bin/carddisp.pl?gene=LEPQTL1
BCHE	Butyrylcholinesterase	Protein Coding	P06276	63	GC03M165772	1.73199	https://www.genecards.org/cgi-bin/carddisp.pl?gene=BCHE
GSR	Glutathione-Disulfide Reductase	Protein Coding	P00390	63	GC08M030678	1.73199	https://www.genecards.org/cgi-bin/carddisp.pl?gene=GSR
ANGPT2	Angiopoietin 2	Protein Coding	O15123	62	GC08M006499	1.73199	https://www.genecards.org/cgi-bin/carddisp.pl?gene=ANGPT2
CD44	CD44 Molecule (IN Blood Group)	Protein Coding	P16070	62	GC11P035139	1.73199	https://www.genecards.org/cgi-bin/carddisp.pl?gene=CD44
SERPINA1	Serpin Family A Member 1	Protein Coding	P01009	62	GC14M094376	1.73199	https://www.genecards.org/cgi-bin/carddisp.pl?gene=SERPINA1
NR1H4	Nuclear Receptor Subfamily 1 Group H Member 4	Protein Coding	Q96RI1	61	GC12P100473	1.73199	https://www.genecards.org/cgi-bin/carddisp.pl?gene=NR1H4
IGFBP3	Insulin Like Growth Factor Binding Protein 3	Protein Coding	P17936	59	GC07M045912	1.73199	https://www.genecards.org/cgi-bin/carddisp.pl?gene=IGFBP3
CCR2	C-C Motif Chemokine Receptor 2	Protein Coding	P41597	58	GC03P059719	1.73199	https://www.genecards.org/cgi-bin/carddisp.pl?gene=CCR2
NR1H2	Nuclear Receptor Subfamily 1 Group H Member 2	Protein Coding	P55055	58	GC19P050329	1.73199	https://www.genecards.org/cgi-bin/carddisp.pl?gene=NR1H2
SERPINA6	Serpin Family A Member 6	Protein Coding	P08185	58	GC14M120897	1.73199	https://www.genecards.org/cgi-bin/carddisp.pl?gene=SERPINA6
PDE4A	Phosphodiesterase 4A	Protein Coding	P27815	57	GC19P010416	1.73199	https://www.genecards.org/cgi-bin/carddisp.pl?gene=PDE4A
IL22	Interleukin 22	Protein Coding	Q9GZX6	55	GC12M068248	1.73199	https://www.genecards.org/cgi-bin/carddisp.pl?gene=IL22
BPI	Bactericidal Permeability Increasing Protein	Protein Coding	P17213	54	GC20P038304	1.73199	https://www.genecards.org/cgi-bin/carddisp.pl?gene=BPI
CCL27	C-C Motif Chemokine Ligand 27	Protein Coding	Q9Y4X3	48	GC09M035382	1.73199	https://www.genecards.org/cgi-bin/carddisp.pl?gene=CCL27
AKT2	AKT Serine/Threonine Kinase 2	Protein Coding	P31751	67	GC19M040230	1.61463	https://www.genecards.org/cgi-bin/carddisp.pl?gene=AKT2
PTPN11	Protein Tyrosine Phosphatase Non-Receptor Type 11	Protein Coding	Q06124	67	GC12P112418	1.61463	https://www.genecards.org/cgi-bin/carddisp.pl?gene=PTPN11
JAK1	Janus Kinase 1	Protein Coding	P23458	66	GC01M064833	1.61463	https://www.genecards.org/cgi-bin/carddisp.pl?gene=JAK1
MMP2	Matrix Metallopeptidase 2	Protein Coding	P08253	66	GC16P097295	1.61463	https://www.genecards.org/cgi-bin/carddisp.pl?gene=MMP2
STAT1	Signal Transducer And Activator Of Transcription 1	Protein Coding	P42224	66	GC02M190908	1.61463	https://www.genecards.org/cgi-bin/carddisp.pl?gene=STAT1
TYK2	Tyrosine Kinase 2	Protein Coding	P29597	66	GC19M010350	1.61463	https://www.genecards.org/cgi-bin/carddisp.pl?gene=TYK2
EIF2AK2	Eukaryotic Translation Initiation Factor 2 Alpha Kinase 2	Protein Coding	P19525	63	GC02M037099	1.61463	https://www.genecards.org/cgi-bin/carddisp.pl?gene=EIF2AK2
HSD11B1	Hydroxysteroid 11-Beta Dehydrogenase 1	Protein Coding	P28845	63	GC01P209686	1.61463	https://www.genecards.org/cgi-bin/carddisp.pl?gene=HSD11B1
DPP4	Dipeptidyl Peptidase 4	Protein Coding	P27487	62	GC02M161992	1.61463	https://www.genecards.org/cgi-bin/carddisp.pl?gene=DPP4
HSPA5	Heat Shock Protein Family A (Hsp70) Member 5	Protein Coding	P11021	62	GC09M125234	1.61463	https://www.genecards.org/cgi-bin/carddisp.pl?gene=HSPA5
PTPN6	Protein Tyrosine Phosphatase Non-Receptor Type 6	Protein Coding	P29350	62	GC12P042126	1.61463	https://www.genecards.org/cgi-bin/carddisp.pl?gene=PTPN6
SQSTM1	Sequestosome 1	Protein Coding	Q13501	62	GC05P179806	1.61463	https://www.genecards.org/cgi-bin/carddisp.pl?gene=SQSTM1
STAT2	Signal Transducer And Activator Of Transcription 2	Protein Coding	P52630	62	GC12M056341	1.61463	https://www.genecards.org/cgi-bin/carddisp.pl?gene=STAT2
CP	Ceruloplasmin	Protein Coding	P00450	61	GC03M149162	1.61463	https://www.genecards.org/cgi-bin/carddisp.pl?gene=CP
HMGCR	3-Hydroxy-3-Methylglutaryl-CoA Reductase	Protein Coding	P04035	61	GC05P075336	1.61463	https://www.genecards.org/cgi-bin/carddisp.pl?gene=HMGCR
RXRA	Retinoid X Receptor Alpha	Protein Coding	P19793	61	GC09P134317	1.61463	https://www.genecards.org/cgi-bin/carddisp.pl?gene=RXRA
ANXA1	Annexin A1	Protein Coding	P04083	60	GC09P073151	1.61463	https://www.genecards.org/cgi-bin/carddisp.pl?gene=ANXA1
LYZ	Lysozyme	Protein Coding	P61626	60	GC12P069348	1.61463	https://www.genecards.org/cgi-bin/carddisp.pl?gene=LYZ
AGER	Advanced Glycosylation End-Product Specific Receptor	Protein Coding	Q15109	59	GC06M032180	1.61463	https://www.genecards.org/cgi-bin/carddisp.pl?gene=AGER
FAP	Fibroblast Activation Protein Alpha	Protein Coding	Q12884	59	GC02M162170	1.61463	https://www.genecards.org/cgi-bin/carddisp.pl?gene=FAP
HAVCR2	Hepatitis A Virus Cellular Receptor 2	Protein Coding	Q8TDQ0	59	GC05M157063	1.61463	https://www.genecards.org/cgi-bin/carddisp.pl?gene=HAVCR2
SOCS1	Suppressor Of Cytokine Signaling 1	Protein Coding	O15524	59	GC16M025937	1.61463	https://www.genecards.org/cgi-bin/carddisp.pl?gene=SOCS1
APOH	Apolipoprotein H	Protein Coding	P02749	58	GC17M066212	1.61463	https://www.genecards.org/cgi-bin/carddisp.pl?gene=APOH
CISH	Cytokine Inducible SH2 Containing Protein	Protein Coding	Q9NSE2	58	GC03M054110	1.61463	https://www.genecards.org/cgi-bin/carddisp.pl?gene=CISH
FZD5	Frizzled Class Receptor 5	Protein Coding	Q13467	58	GC02M207762	1.61463	https://www.genecards.org/cgi-bin/carddisp.pl?gene=FZD5
IRF9	Interferon Regulatory Factor 9	Protein Coding	Q00978	58	GC14P024161	1.61463	https://www.genecards.org/cgi-bin/carddisp.pl?gene=IRF9
LCN2	Lipocalin 2	Protein Coding	P80188	58	GC09P128149	1.61463	https://www.genecards.org/cgi-bin/carddisp.pl?gene=LCN2
BMP6	Bone Morphogenetic Protein 6	Protein Coding	P22004	57	GC06P007726	1.61463	https://www.genecards.org/cgi-bin/carddisp.pl?gene=BMP6
IFNB1	Interferon Beta 1	Protein Coding	P01574	56	GC09M021077	1.61463	https://www.genecards.org/cgi-bin/carddisp.pl?gene=IFNB1
SPHK2	Sphingosine Kinase 2	Protein Coding	Q9NRA0	56	GC19P048619	1.61463	https://www.genecards.org/cgi-bin/carddisp.pl?gene=SPHK2
ACP1	Acid Phosphatase 1	Protein Coding	P24666	55	GC02P000934	1.61463	https://www.genecards.org/cgi-bin/carddisp.pl?gene=ACP1
ACSF3	Acyl-CoA Synthetase Family Member 3	Protein Coding	Q4G176	55	GC16P089088	1.61463	https://www.genecards.org/cgi-bin/carddisp.pl?gene=ACSF3
BHMT	Betaine--Homocysteine S-Methyltransferase	Protein Coding	Q93088	55	GC05P079111	1.61463	https://www.genecards.org/cgi-bin/carddisp.pl?gene=BHMT
S100A10	S100 Calcium Binding Protein A10	Protein Coding	P60903	55	GC01M163844	1.61463	https://www.genecards.org/cgi-bin/carddisp.pl?gene=S100A10
CA3	Carbonic Anhydrase 3	Protein Coding	P07451	54	GC08P085373	1.61463	https://www.genecards.org/cgi-bin/carddisp.pl?gene=CA3
DEPTOR	DEP Domain Containing MTOR Interacting Protein	Protein Coding	Q8TB45	54	GC08P119873	1.61463	https://www.genecards.org/cgi-bin/carddisp.pl?gene=DEPTOR
IL1RL1	Interleukin 1 Receptor Like 1	Protein Coding	Q01638	54	GC02P102294	1.61463	https://www.genecards.org/cgi-bin/carddisp.pl?gene=IL1RL1
LAG3	Lymphocyte Activating 3	Protein Coding	P18627	53	GC12P042113	1.61463	https://www.genecards.org/cgi-bin/carddisp.pl?gene=LAG3
MX1	MX Dynamin Like GTPase 1	Protein Coding	P20591	53	GC21P041420	1.61463	https://www.genecards.org/cgi-bin/carddisp.pl?gene=MX1
NCAN	Neurocan	Protein Coding	O14594	53	GC19P122633	1.61463	https://www.genecards.org/cgi-bin/carddisp.pl?gene=NCAN
ICMT	Isoprenylcysteine Carboxyl Methyltransferase	Protein Coding	O60725	51	GC01M015147	1.61463	https://www.genecards.org/cgi-bin/carddisp.pl?gene=ICMT
IFNA1	Interferon Alpha 1	Protein Coding	P01562	51	GC09P021798	1.61463	https://www.genecards.org/cgi-bin/carddisp.pl?gene=IFNA1
EXOSC6	Exosome Component 6	Protein Coding	Q5RKV6	42	GC16M070246	1.61463	https://www.genecards.org/cgi-bin/carddisp.pl?gene=EXOSC6
GAS5	Growth Arrest Specific 5	RNA Gene		33	GC01M173947	1.61463	https://www.genecards.org/cgi-bin/carddisp.pl?gene=GAS5
MIR155	MicroRNA 155	RNA Gene		31	GC21P025573	1.61463	https://www.genecards.org/cgi-bin/carddisp.pl?gene=MIR155
CRNDE	Colorectal Neoplasia Differentially Expressed	RNA Gene		30	GC16M054969	1.61463	https://www.genecards.org/cgi-bin/carddisp.pl?gene=CRNDE
MIR122	MicroRNA 122	RNA Gene		30	GC18P058451	1.61463	https://www.genecards.org/cgi-bin/carddisp.pl?gene=MIR122
MIR212	MicroRNA 212	RNA Gene		29	GC17M002050	1.61463	https://www.genecards.org/cgi-bin/carddisp.pl?gene=MIR212
LINC01088	Long Intergenic Non-Protein Coding RNA 1088	RNA Gene		25	GC04P079036	1.61463	https://www.genecards.org/cgi-bin/carddisp.pl?gene=LINC01088
CERNA3	Competing Endogenous LncRNA 3 For MiR-645	RNA Gene		21	GC08P056352	1.61463	https://www.genecards.org/cgi-bin/carddisp.pl?gene=CERNA3
HFE-AS1	HFE Antisense RNA 1	RNA Gene		18	GC06M026085	1.61463	https://www.genecards.org/cgi-bin/carddisp.pl?gene=HFE-AS1
LINC02315	Long Intergenic Non-Protein Coding RNA 2315	RNA Gene		13	GC14P048407	1.61463	https://www.genecards.org/cgi-bin/carddisp.pl?gene=LINC02315
TLR2	Toll Like Receptor 2	Protein Coding	O60603	65	GC04P153684	1.3313	https://www.genecards.org/cgi-bin/carddisp.pl?gene=TLR2
GLUD1	Glutamate Dehydrogenase 1	Protein Coding	P00367	63	GC10M087050	1.3313	https://www.genecards.org/cgi-bin/carddisp.pl?gene=GLUD1
THBD	Thrombomodulin	Protein Coding	P07204	59	GC20M023026	1.3313	https://www.genecards.org/cgi-bin/carddisp.pl?gene=THBD
TLR9	Toll Like Receptor 9	Protein Coding	Q9NR96	59	GC03M054152	1.3313	https://www.genecards.org/cgi-bin/carddisp.pl?gene=TLR9
ELN	Elastin	Protein Coding	P15502	56	GC07P074027	1.3313	https://www.genecards.org/cgi-bin/carddisp.pl?gene=ELN
NOX4	NADPH Oxidase 4	Protein Coding	Q9NPH5	55	GC11M089324	1.3313	https://www.genecards.org/cgi-bin/carddisp.pl?gene=NOX4
VSIG4	V-Set And Immunoglobulin Domain Containing 4	Protein Coding	Q9Y279	50	GC0XM066021	1.3313	https://www.genecards.org/cgi-bin/carddisp.pl?gene=VSIG4
SFRP5	Secreted Frizzled Related Protein 5	Protein Coding	Q5T4F7	48	GC10M097766	1.3313	https://www.genecards.org/cgi-bin/carddisp.pl?gene=SFRP5
MIR185	MicroRNA 185	RNA Gene		31	GC22P075390	1.3313	https://www.genecards.org/cgi-bin/carddisp.pl?gene=MIR185
MIR34B	MicroRNA 34b	RNA Gene		30	GC11P112584	1.3313	https://www.genecards.org/cgi-bin/carddisp.pl?gene=MIR34B
MIR29C	MicroRNA 29c	RNA Gene		27	GC01M207835	1.3313	https://www.genecards.org/cgi-bin/carddisp.pl?gene=MIR29C
MIR922	MicroRNA 922	RNA Gene		16	GC03M197674	1.3313	https://www.genecards.org/cgi-bin/carddisp.pl?gene=MIR922
ABCG2	ATP Binding Cassette Subfamily G Member 2 (JR Blood Group)	Protein Coding	Q9UNQ0	63	GC04M088090	1.31617	https://www.genecards.org/cgi-bin/carddisp.pl?gene=ABCG2
GLI3	GLI Family Zinc Finger 3	Protein Coding	P10071	62	GC07M041960	1.31617	https://www.genecards.org/cgi-bin/carddisp.pl?gene=GLI3
GLDC	Glycine Decarboxylase	Protein Coding	P23378	60	GC09M006522	1.31617	https://www.genecards.org/cgi-bin/carddisp.pl?gene=GLDC
KCNMA1	Potassium Calcium-Activated Channel Subfamily M Alpha 1	Protein Coding	Q12791	60	GC10M076869	1.31617	https://www.genecards.org/cgi-bin/carddisp.pl?gene=KCNMA1
CYP2C8	Cytochrome P450 Family 2 Subfamily C Member 8	Protein Coding	P10632	59	GC10M095038	1.31617	https://www.genecards.org/cgi-bin/carddisp.pl?gene=CYP2C8
HNF1A	HNF1 Homeobox A	Protein Coding	P20823	59	GC12P120978	1.31617	https://www.genecards.org/cgi-bin/carddisp.pl?gene=HNF1A
TBL1XR1	TBL1X/Y Related 1	Protein Coding	Q9BZK7	59	GC03M177019	1.31617	https://www.genecards.org/cgi-bin/carddisp.pl?gene=TBL1XR1
TRAF6	TNF Receptor Associated Factor 6	Protein Coding	Q9Y4K3	59	GC11M036467	1.31617	https://www.genecards.org/cgi-bin/carddisp.pl?gene=TRAF6
ACADS	Acyl-CoA Dehydrogenase Short Chain	Protein Coding	P16219	58	GC12P134684	1.31617	https://www.genecards.org/cgi-bin/carddisp.pl?gene=ACADS
HTR3A	5-Hydroxytryptamine Receptor 3A	Protein Coding	P46098	58	GC11P113975	1.31617	https://www.genecards.org/cgi-bin/carddisp.pl?gene=HTR3A
ROBO1	Roundabout Guidance Receptor 1	Protein Coding	Q9Y6N7	58	GC03M078597	1.31617	https://www.genecards.org/cgi-bin/carddisp.pl?gene=ROBO1
TCF12	Transcription Factor 12	Protein Coding	Q99081	58	GC15P056918	1.31617	https://www.genecards.org/cgi-bin/carddisp.pl?gene=TCF12
AOX1	Aldehyde Oxidase 1	Protein Coding	Q06278	56	GC02P200585	1.31617	https://www.genecards.org/cgi-bin/carddisp.pl?gene=AOX1
GRB10	Growth Factor Receptor Bound Protein 10	Protein Coding	Q13322	56	GC07M050590	1.31617	https://www.genecards.org/cgi-bin/carddisp.pl?gene=GRB10
NRF1	Nuclear Respiratory Factor 1	Protein Coding	Q16656	56	GC07P129611	1.31617	https://www.genecards.org/cgi-bin/carddisp.pl?gene=NRF1
P2RX4	Purinergic Receptor P2X 4	Protein Coding	Q99571	56	GC12P134701	1.31617	https://www.genecards.org/cgi-bin/carddisp.pl?gene=P2RX4
SOD3	Superoxide Dismutase 3	Protein Coding	P08294	56	GC04P025931	1.31617	https://www.genecards.org/cgi-bin/carddisp.pl?gene=SOD3
UGCG	UDP-Glucose Ceramide Glucosyltransferase	Protein Coding	Q16739	56	GC09P111896	1.31617	https://www.genecards.org/cgi-bin/carddisp.pl?gene=UGCG
ZBTB16	Zinc Finger And BTB Domain Containing 16	Protein Coding	Q05516	56	GC11P114059	1.31617	https://www.genecards.org/cgi-bin/carddisp.pl?gene=ZBTB16
FBN2	Fibrillin 2	Protein Coding	P35556	55	GC05M128257	1.31617	https://www.genecards.org/cgi-bin/carddisp.pl?gene=FBN2
UBE2D1	Ubiquitin Conjugating Enzyme E2 D1	Protein Coding	P51668	55	GC10P058334	1.31617	https://www.genecards.org/cgi-bin/carddisp.pl?gene=UBE2D1
CYP2C18	Cytochrome P450 Family 2 Subfamily C Member 18	Protein Coding	P33260	54	GC10P112743	1.31617	https://www.genecards.org/cgi-bin/carddisp.pl?gene=CYP2C18
RPLP0	Ribosomal Protein Lateral Stalk Subunit P0	Protein Coding	P05388	54	GC12M120196	1.31617	https://www.genecards.org/cgi-bin/carddisp.pl?gene=RPLP0
COQ5	Coenzyme Q5, Methyltransferase	Protein Coding	Q5HYK3	53	GC12M120503	1.31617	https://www.genecards.org/cgi-bin/carddisp.pl?gene=COQ5
CUX2	Cut Like Homeobox 2	Protein Coding	O14529	53	GC12P111034	1.31617	https://www.genecards.org/cgi-bin/carddisp.pl?gene=CUX2
PDLIM1	PDZ And LIM Domain 1	Protein Coding	O00151	53	GC10M095237	1.31617	https://www.genecards.org/cgi-bin/carddisp.pl?gene=PDLIM1
CHCHD10	Coiled-Coil-Helix-Coiled-Coil-Helix Domain Containing 10	Protein Coding	Q8WYQ3	52	GC22M023765	1.31617	https://www.genecards.org/cgi-bin/carddisp.pl?gene=CHCHD10
DLG5	Discs Large MAGUK Scaffold Protein 5	Protein Coding	Q8TDM6	52	GC10M077790	1.31617	https://www.genecards.org/cgi-bin/carddisp.pl?gene=DLG5
RHOBTB2	Rho Related BTB Domain Containing 2	Protein Coding	Q9BYZ6	52	GC08P024625	1.31617	https://www.genecards.org/cgi-bin/carddisp.pl?gene=RHOBTB2
SPECC1L	Sperm Antigen With Calponin Homology And Coiled-Coil Domains 1 Like	Protein Coding	Q69YQ0	52	GC22P075624	1.31617	https://www.genecards.org/cgi-bin/carddisp.pl?gene=SPECC1L
TCTN3	Tectonic Family Member 3	Protein Coding	Q6NUS6	52	GC10M095663	1.31617	https://www.genecards.org/cgi-bin/carddisp.pl?gene=TCTN3
PSMD9	Proteasome 26S Subunit, Non-ATPase 9	Protein Coding	O00233	51	GC12P134711	1.31617	https://www.genecards.org/cgi-bin/carddisp.pl?gene=PSMD9
SETD1B	SET Domain Containing 1B, Histone Lysine Methyltransferase	Protein Coding	Q9UPS6	51	GC12P134708	1.31617	https://www.genecards.org/cgi-bin/carddisp.pl?gene=SETD1B
ULK4	Unc-51 Like Kinase 4	Protein Coding	Q96C45	51	GC03M041247	1.31617	https://www.genecards.org/cgi-bin/carddisp.pl?gene=ULK4
CCAR2	Cell Cycle And Apoptosis Regulator 2	Protein Coding	Q8N163	50	GC08P022604	1.31617	https://www.genecards.org/cgi-bin/carddisp.pl?gene=CCAR2
DHX15	DEAH-Box Helicase 15	Protein Coding	O43143	50	GC04M024519	1.31617	https://www.genecards.org/cgi-bin/carddisp.pl?gene=DHX15
GADD45G	Growth Arrest And DNA Damage Inducible Gamma	Protein Coding	O95257	50	GC09P089605	1.31617	https://www.genecards.org/cgi-bin/carddisp.pl?gene=GADD45G
JAZF1	JAZF Zinc Finger 1	Protein Coding	Q86VZ6	50	GC07M027830	1.31617	https://www.genecards.org/cgi-bin/carddisp.pl?gene=JAZF1
ADGRA3	Adhesion G Protein-Coupled Receptor A3	Protein Coding	Q8IWK6	49	GC04M022345	1.31617	https://www.genecards.org/cgi-bin/carddisp.pl?gene=ADGRA3
LRFN5	Leucine Rich Repeat And Fibronectin Type III Domain Containing 5	Protein Coding	Q96NI6	49	GC14P048423	1.31617	https://www.genecards.org/cgi-bin/carddisp.pl?gene=LRFN5
ANAPC5	Anaphase Promoting Complex Subunit 5	Protein Coding	Q9UJX4	48	GC12M121308	1.31617	https://www.genecards.org/cgi-bin/carddisp.pl?gene=ANAPC5
GGT5	Gamma-Glutamyltransferase 5	Protein Coding	P36269	48	GC22M024219	1.31617	https://www.genecards.org/cgi-bin/carddisp.pl?gene=GGT5
PDLIM2	PDZ And LIM Domain 2	Protein Coding	Q96JY6	48	GC08P022578	1.31617	https://www.genecards.org/cgi-bin/carddisp.pl?gene=PDLIM2
UBE2H	Ubiquitin Conjugating Enzyme E2 H	Protein Coding	P62256	48	GC07M129830	1.31617	https://www.genecards.org/cgi-bin/carddisp.pl?gene=UBE2H
LINGO2	Leucine Rich Repeat And Ig Domain Containing 2	Protein Coding	Q7L985	47	GC09M029748	1.31617	https://www.genecards.org/cgi-bin/carddisp.pl?gene=LINGO2
MACROD2	Mono-ADP Ribosylhydrolase 2	Protein Coding	A1Z1Q3	47	GC20P013995	1.31617	https://www.genecards.org/cgi-bin/carddisp.pl?gene=MACROD2
UNC119B	Unc-119 Lipid Binding Chaperone B	Protein Coding	A6NIH7	47	GC12P120710	1.31617	https://www.genecards.org/cgi-bin/carddisp.pl?gene=UNC119B
CGNL1	Cingulin Like 1	Protein Coding	Q0VF96	46	GC15P057375	1.31617	https://www.genecards.org/cgi-bin/carddisp.pl?gene=CGNL1
CNTNAP5	Contactin Associated Protein Family Member 5	Protein Coding	Q8WYK1	46	GC02P124025	1.31617	https://www.genecards.org/cgi-bin/carddisp.pl?gene=CNTNAP5
NUDT12	Nudix Hydrolase 12	Protein Coding	Q9BQG2	46	GC05M103548	1.31617	https://www.genecards.org/cgi-bin/carddisp.pl?gene=NUDT12
TNFAIP2	TNF Alpha Induced Protein 2	Protein Coding	Q03169	46	GC14P116954	1.31617	https://www.genecards.org/cgi-bin/carddisp.pl?gene=TNFAIP2
GCN1	GCN1 Activator Of EIF2AK4	Protein Coding	Q92616	45	GC12M120128	1.31617	https://www.genecards.org/cgi-bin/carddisp.pl?gene=GCN1
L3MBTL3	L3MBTL Histone Methyl-Lysine Binding Protein 3	Protein Coding	Q96JM7	45	GC06P130013	1.31617	https://www.genecards.org/cgi-bin/carddisp.pl?gene=L3MBTL3
LSAMP	Limbic System Associated Membrane Protein	Protein Coding	Q13449	45	GC03M115802	1.31617	https://www.genecards.org/cgi-bin/carddisp.pl?gene=LSAMP
SLC38A8	Solute Carrier Family 38 Member 8	Protein Coding	A6NNN8	45	GC16M084009	1.31617	https://www.genecards.org/cgi-bin/carddisp.pl?gene=SLC38A8
ZNF44	Zinc Finger Protein 44	Protein Coding	P15621	45	GC19M012224	1.31617	https://www.genecards.org/cgi-bin/carddisp.pl?gene=ZNF44
CSTF3	Cleavage Stimulation Factor Subunit 3	Protein Coding	Q12996	44	GC11M033077	1.31617	https://www.genecards.org/cgi-bin/carddisp.pl?gene=CSTF3
MLEC	Malectin	Protein Coding	Q14165	44	GC12P120687	1.31617	https://www.genecards.org/cgi-bin/carddisp.pl?gene=MLEC
SWT1	SWT1 RNA Endoribonuclease Homolog	Protein Coding	Q5T5J6	44	GC01P185157	1.31617	https://www.genecards.org/cgi-bin/carddisp.pl?gene=SWT1
MTARC2	Mitochondrial Amidoxime Reducing Component 2	Protein Coding	Q969Z3	43	GC01P220748	1.31617	https://www.genecards.org/cgi-bin/carddisp.pl?gene=MTARC2
NUP43	Nucleoporin 43	Protein Coding	Q8NFH3	43	GC06M149724	1.31617	https://www.genecards.org/cgi-bin/carddisp.pl?gene=NUP43
PIWIL3	Piwi Like RNA-Mediated Gene Silencing 3	Protein Coding	Q7Z3Z3	43	GC22M079047	1.31617	https://www.genecards.org/cgi-bin/carddisp.pl?gene=PIWIL3
SAMD3	Sterile Alpha Motif Domain Containing 3	Protein Coding	Q8N6K7	43	GC06M130144	1.31617	https://www.genecards.org/cgi-bin/carddisp.pl?gene=SAMD3
BIN3	Bridging Integrator 3	Protein Coding	Q9NQY0	42	GC08M022620	1.31617	https://www.genecards.org/cgi-bin/carddisp.pl?gene=BIN3
C12orf43	Chromosome 12 Open Reading Frame 43	Protein Coding	Q96C57	42	GC12M121000	1.31617	https://www.genecards.org/cgi-bin/carddisp.pl?gene=C12orf43
COMMD9	COMM Domain Containing 9	Protein Coding	Q9P000	41	GC11M036293	1.31617	https://www.genecards.org/cgi-bin/carddisp.pl?gene=COMMD9
DIRAS2	DIRAS Family GTPase 2	Protein Coding	Q96HU8	41	GC09M090609	1.31617	https://www.genecards.org/cgi-bin/carddisp.pl?gene=DIRAS2
EXOC3L4	Exocyst Complex Component 3 Like 4	Protein Coding	Q17RC7	41	GC14P116953	1.31617	https://www.genecards.org/cgi-bin/carddisp.pl?gene=EXOC3L4
SPPL3	Signal Peptide Peptidase Like 3	Protein Coding	Q8TCT6	41	GC12M123803	1.31617	https://www.genecards.org/cgi-bin/carddisp.pl?gene=SPPL3
TBC1D12	TBC1 Domain Family Member 12	Protein Coding	O60347	41	GC10P094402	1.31617	https://www.genecards.org/cgi-bin/carddisp.pl?gene=TBC1D12
TMEM200A	Transmembrane Protein 200A	Protein Coding	Q86VY9	41	GC06P130365	1.31617	https://www.genecards.org/cgi-bin/carddisp.pl?gene=TMEM200A
ZNF777	Zinc Finger Protein 777	Protein Coding	Q9ULD5	41	GC07M149431	1.31617	https://www.genecards.org/cgi-bin/carddisp.pl?gene=ZNF777
IQUB	IQ Motif And Ubiquitin Domain Containing	Protein Coding	Q8NA54	40	GC07M123451	1.31617	https://www.genecards.org/cgi-bin/carddisp.pl?gene=IQUB
ZNF280D	Zinc Finger Protein 280D	Protein Coding	Q6N043	40	GC15M056630	1.31617	https://www.genecards.org/cgi-bin/carddisp.pl?gene=ZNF280D
LRRC75B	Leucine Rich Repeat Containing 75B	Protein Coding	Q2VPJ9	39	GC22M024585	1.31617	https://www.genecards.org/cgi-bin/carddisp.pl?gene=LRRC75B
PRR5L	Proline Rich 5 Like	Protein Coding	Q6MZQ0	39	GC11P036401	1.31617	https://www.genecards.org/cgi-bin/carddisp.pl?gene=PRR5L
TTC13	Tetratricopeptide Repeat Domain 13	Protein Coding	Q8NBP0	39	GC01M230906	1.31617	https://www.genecards.org/cgi-bin/carddisp.pl?gene=TTC13
TCP11L1	T-Complex 11 Like 1	Protein Coding	Q9NUJ3	38	GC11P033047	1.31617	https://www.genecards.org/cgi-bin/carddisp.pl?gene=TCP11L1
ZNF827	Zinc Finger Protein 827	Protein Coding	Q17R98	38	GC04M145757	1.31617	https://www.genecards.org/cgi-bin/carddisp.pl?gene=ZNF827
ACSM6	Acyl-CoA Synthetase Medium Chain Family Member 6	Protein Coding	Q6P461	37	GC10P095194	1.31617	https://www.genecards.org/cgi-bin/carddisp.pl?gene=ACSM6
C8orf58	Chromosome 8 Open Reading Frame 58	Protein Coding	Q8NAV2	35	GC08P022599	1.31617	https://www.genecards.org/cgi-bin/carddisp.pl?gene=C8orf58
C1orf115	Chromosome 1 Open Reading Frame 115	Protein Coding	Q9H7X2	34	GC01P220689	1.31617	https://www.genecards.org/cgi-bin/carddisp.pl?gene=C1orf115
PXT1	Peroxisomal Testis Enriched Protein 1	Protein Coding	Q8NFP0	33	GC06M036390	1.31617	https://www.genecards.org/cgi-bin/carddisp.pl?gene=PXT1
HNF1A-AS1	HNF1A Antisense RNA 1	RNA Gene		28	GC12M123804	1.31617	https://www.genecards.org/cgi-bin/carddisp.pl?gene=HNF1A-AS1
ADORA2A-AS1	ADORA2A Antisense RNA 1	RNA Gene	P86434	26	GC22M079503	1.31617	https://www.genecards.org/cgi-bin/carddisp.pl?gene=ADORA2A-AS1
LINC01405	Long Intergenic Non-Protein Coding RNA 1405	RNA Gene		24	GC12P110982	1.31617	https://www.genecards.org/cgi-bin/carddisp.pl?gene=LINC01405
TUSC7	Tumor Suppressor Candidate 7	RNA Gene		24	GC03P116647	1.31617	https://www.genecards.org/cgi-bin/carddisp.pl?gene=TUSC7
LINC00926	Long Intergenic Non-Protein Coding RNA 926	RNA Gene		22	GC15P166519	1.31617	https://www.genecards.org/cgi-bin/carddisp.pl?gene=LINC00926
DLG5-AS1	DLG5 Antisense RNA 1	RNA Gene		20	GC10P112484	1.31617	https://www.genecards.org/cgi-bin/carddisp.pl?gene=DLG5-AS1
NIHCOLE	NcRNA Involved In NHEJ Oncogenic Ligation Efficiency	RNA Gene		20	GC05P104116	1.31617	https://www.genecards.org/cgi-bin/carddisp.pl?gene=NIHCOLE
LINC01208	Long Intergenic Non-Protein Coding RNA 1208	RNA Gene		19	GC03M176415	1.31617	https://www.genecards.org/cgi-bin/carddisp.pl?gene=LINC01208
LINC00578	Long Intergenic Non-Protein Coding RNA 578	RNA Gene		17	GC03P177441	1.31617	https://www.genecards.org/cgi-bin/carddisp.pl?gene=LINC00578
PKN2-AS1	PKN2 Antisense RNA 1	RNA Gene		16	GC01M087620	1.31617	https://www.genecards.org/cgi-bin/carddisp.pl?gene=PKN2-AS1
POM121L9P	POM121 Transmembrane Nucleoporin Like 9, Pseudogene	Pseudogene		16	GC22P024251	1.31617	https://www.genecards.org/cgi-bin/carddisp.pl?gene=POM121L9P
LINC01740	Long Intergenic Non-Protein Coding RNA 1740	RNA Gene		14	GC01P212548	1.31617	https://www.genecards.org/cgi-bin/carddisp.pl?gene=LINC01740
LINC02199	Long Intergenic Non-Protein Coding RNA 2199	RNA Gene		14	GC05P008842	1.31617	https://www.genecards.org/cgi-bin/carddisp.pl?gene=LINC02199
LINC02473	Long Intergenic Non-Protein Coding RNA 2473	RNA Gene		14	GC04P025922	1.31617	https://www.genecards.org/cgi-bin/carddisp.pl?gene=LINC02473
LINC02987	Long Intergenic Non-Protein Coding RNA 2987	RNA Gene		14	GC19P124649	1.31617	https://www.genecards.org/cgi-bin/carddisp.pl?gene=LINC02987
LINC03062	Long Intergenic Non-Protein Coding RNA 3062	RNA Gene		14	GC09P101974	1.31617	https://www.genecards.org/cgi-bin/carddisp.pl?gene=LINC03062
LINC01148	Long Intergenic Non-Protein Coding RNA 1148	RNA Gene		13	GC14P086991	1.31617	https://www.genecards.org/cgi-bin/carddisp.pl?gene=LINC01148
LINC02771	Long Intergenic Non-Protein Coding RNA 2771	RNA Gene		13	GC01M212473	1.31617	https://www.genecards.org/cgi-bin/carddisp.pl?gene=LINC02771
LOC101929237	Uncharacterized LOC101929237	RNA Gene		13	GC08P022877	1.31617	https://www.genecards.org/cgi-bin/carddisp.pl?gene=LOC101929237
LRFN5-DT	LRFN5 Divergent Transcript	RNA Gene		13	GC14M041583	1.31617	https://www.genecards.org/cgi-bin/carddisp.pl?gene=LRFN5-DT
MIR4290HG	MIR4290 Host Gene	RNA Gene		13	GC09M111234	1.31617	https://www.genecards.org/cgi-bin/carddisp.pl?gene=MIR4290HG
BIN3-IT1	BIN3 Intronic Transcript 1	RNA Gene		12	GC08M022640	1.31617	https://www.genecards.org/cgi-bin/carddisp.pl?gene=BIN3-IT1
ENSG00000248235	Novel Protein	Protein Coding		12	GC08P022589	1.31617	https://www.genecards.org/cgi-bin/carddisp.pl?gene=ENSG00000248235
LINC01884	Long Intergenic Non-Protein Coding RNA 1884	RNA Gene		12	GC02P022508	1.31617	https://www.genecards.org/cgi-bin/carddisp.pl?gene=LINC01884
LINC02141	Long Intergenic Non-Protein Coding RNA 2141	RNA Gene		12	GC16P097477	1.31617	https://www.genecards.org/cgi-bin/carddisp.pl?gene=LINC02141
LINC02296	Long Intergenic Non-Protein Coding RNA 2296	RNA Gene		12	GC14M086316	1.31617	https://www.genecards.org/cgi-bin/carddisp.pl?gene=LINC02296
BCRP1	BCR Pseudogene 1	Pseudogene		11	GC22M079508	1.31617	https://www.genecards.org/cgi-bin/carddisp.pl?gene=BCRP1
LINC02726	Long Intergenic Non-Protein Coding RNA 2726	RNA Gene		11	GC11P023731	1.31617	https://www.genecards.org/cgi-bin/carddisp.pl?gene=LINC02726
LINC03036	Long Intergenic Non-Protein Coding RNA 3036	RNA Gene		11	GC10M118848	1.31617	https://www.genecards.org/cgi-bin/carddisp.pl?gene=LINC03036
RNU6-844P	RNA, U6 Small Nuclear 844, Pseudogene	Pseudogene		11	GC15M057405	1.31617	https://www.genecards.org/cgi-bin/carddisp.pl?gene=RNU6-844P
ATP5MGP3	ATP Synthase Membrane Subunit G Pseudogene 3	Pseudogene		10	GC04M024657	1.31617	https://www.genecards.org/cgi-bin/carddisp.pl?gene=ATP5MGP3
ENSG00000253200	Novel Transcript, Antisense To KIAA1967	RNA Gene		10	GC08M022613	1.31617	https://www.genecards.org/cgi-bin/carddisp.pl?gene=ENSG00000253200
ENSG00000255946	Novel Transcript	RNA Gene		10	GC12M123801	1.31617	https://www.genecards.org/cgi-bin/carddisp.pl?gene=ENSG00000255946
ENSG00000256569	Novel Transcript, Antisense To UNC119B	RNA Gene		10	GC12M120721	1.31617	https://www.genecards.org/cgi-bin/carddisp.pl?gene=ENSG00000256569
ENSG00000285253	Novel Protein	Protein Coding		10	GC15M152622	1.31617	https://www.genecards.org/cgi-bin/carddisp.pl?gene=ENSG00000285253
PRDX1P1	Peroxiredoxin 1 Pseudogene 1	Pseudogene		10	GC09M012972	1.31617	https://www.genecards.org/cgi-bin/carddisp.pl?gene=PRDX1P1
RNU6-710P	RNA, U6 Small Nuclear 710, Pseudogene	Pseudogene		10	GC09M111996	1.31617	https://www.genecards.org/cgi-bin/carddisp.pl?gene=RNU6-710P
ENSG00000204049	Novel Transcript, Antisense To DLG5	RNA Gene		9	GC10P077866	1.31617	https://www.genecards.org/cgi-bin/carddisp.pl?gene=ENSG00000204049
ENSG00000227678	Novel Transcript, Antisense To L3MBTL3	RNA Gene		9	GC06M130133	1.31617	https://www.genecards.org/cgi-bin/carddisp.pl?gene=ENSG00000227678
ENSG00000230947	Novel Transcript	RNA Gene		9	GC22P024598	1.31617	https://www.genecards.org/cgi-bin/carddisp.pl?gene=ENSG00000230947
ENSG00000272849	Novel Transcript	RNA Gene		9	GC12P134709	1.31617	https://www.genecards.org/cgi-bin/carddisp.pl?gene=ENSG00000272849
APOOP5	Apolipoprotein O Pseudogene 5	Pseudogene		8	GC16M059754	1.31617	https://www.genecards.org/cgi-bin/carddisp.pl?gene=APOOP5
ENSG00000255186	Novel Transcript	RNA Gene		8	GC11P036408	1.31617	https://www.genecards.org/cgi-bin/carddisp.pl?gene=ENSG00000255186
ENSG00000286070	Novel Protein	Protein Coding		8	GC22P076546	1.31617	https://www.genecards.org/cgi-bin/carddisp.pl?gene=ENSG00000286070
NPM1P12	Nucleophosmin 1 Pseudogene 12	Pseudogene		8	GC07P149333	1.31617	https://www.genecards.org/cgi-bin/carddisp.pl?gene=NPM1P12
RN7SKP27	RN7SK Pseudogene 27	Pseudogene		8	GC02P022861	1.31617	https://www.genecards.org/cgi-bin/carddisp.pl?gene=RN7SKP27
RPL21P45	Ribosomal Protein L21 Pseudogene 45	Pseudogene		8	GC04P038686	1.31617	https://www.genecards.org/cgi-bin/carddisp.pl?gene=RPL21P45
RPS3AP39	RPS3A Pseudogene 39	Pseudogene		8	GC11M003549	1.31617	https://www.genecards.org/cgi-bin/carddisp.pl?gene=RPS3AP39
RWDD4P2	RWD Domain Containing 4 Pseudogene 2	Pseudogene		8	GC07M039852	1.31617	https://www.genecards.org/cgi-bin/carddisp.pl?gene=RWDD4P2
SNRPCP5	Small Nuclear Ribonucleoprotein Polypeptide C Pseudogene 5	Pseudogene		8	GC11P003531	1.31617	https://www.genecards.org/cgi-bin/carddisp.pl?gene=SNRPCP5
MAN1A2P1	Mannosidase Alpha Class 1A Member 2 Pseudogene 1	Pseudogene		7	GC19M028790	1.31617	https://www.genecards.org/cgi-bin/carddisp.pl?gene=MAN1A2P1
MTND5P15	MT-ND5 Pseudogene 15	Pseudogene		7	GC03M177010	1.31617	https://www.genecards.org/cgi-bin/carddisp.pl?gene=MTND5P15
RN7SL496P	RNA, 7SL, Cytoplasmic 496, Pseudogene	Pseudogene		7	GC07P041118	1.31617	https://www.genecards.org/cgi-bin/carddisp.pl?gene=RN7SL496P
RPS10P29	Ribosomal Protein S10 Pseudogene 29	Pseudogene		7	GC22M081056	1.31617	https://www.genecards.org/cgi-bin/carddisp.pl?gene=RPS10P29
THAP12P4	THAP Domain Containing 12 Pseudogene 4	Pseudogene		7	GC11P023478	1.31617	https://www.genecards.org/cgi-bin/carddisp.pl?gene=THAP12P4
lnc-GGT5-3		RNA Gene		7	GC22M079996	1.31617	https://www.genecards.org/cgi-bin/carddisp.pl?gene=lnc-GGT5-3
ENSG00000215464	40S Ribosomal Protein S10 (RPS10) Pseudogene	Pseudogene		6	GC22M079596	1.31617	https://www.genecards.org/cgi-bin/carddisp.pl?gene=ENSG00000215464
ENSG00000289436	Novel Transcript	RNA Gene		6	GC14P041604	1.31617	https://www.genecards.org/cgi-bin/carddisp.pl?gene=ENSG00000289436
HSALNG0020226-143		RNA Gene		6	GC14P041209	1.31617	https://www.genecards.org/cgi-bin/carddisp.pl?gene=HSALNG0020226-143
MTCYBP37	MT-CYB Pseudogene 37	Pseudogene		6	GC05P008621	1.31617	https://www.genecards.org/cgi-bin/carddisp.pl?gene=MTCYBP37
NONHSAG045678.2-003		RNA Gene		6	GC22P075612	1.31617	https://www.genecards.org/cgi-bin/carddisp.pl?gene=NONHSAG045678.2-003
lnc-C5orf30-10		RNA Gene		6	GC05P103511	1.31617	https://www.genecards.org/cgi-bin/carddisp.pl?gene=lnc-C5orf30-10
lnc-CTAGE5-10		RNA Gene		6	GC14P048424	1.31617	https://www.genecards.org/cgi-bin/carddisp.pl?gene=lnc-CTAGE5-10
lnc-EXOC3L4-1		RNA Gene		6	GC14P117163	1.31617	https://www.genecards.org/cgi-bin/carddisp.pl?gene=lnc-EXOC3L4-1
CM034962-327		RNA Gene		5	GC12M123908	1.31617	https://www.genecards.org/cgi-bin/carddisp.pl?gene=CM034962-327
CM034964-085		RNA Gene		5	GC14M041585	1.31617	https://www.genecards.org/cgi-bin/carddisp.pl?gene=CM034964-085
CM034964-278		RNA Gene		5	GC14P117023	1.31617	https://www.genecards.org/cgi-bin/carddisp.pl?gene=CM034964-278
HSALNG0010747		RNA Gene		5	GC01M220706	1.31617	https://www.genecards.org/cgi-bin/carddisp.pl?gene=HSALNG0010747
HSALNG0020226-144		RNA Gene		5	GC14P048421	1.31617	https://www.genecards.org/cgi-bin/carddisp.pl?gene=HSALNG0020226-144
HSALNG0053445		RNA Gene		5	GC06M130121	1.31617	https://www.genecards.org/cgi-bin/carddisp.pl?gene=HSALNG0053445
HSALNG0100844		RNA Gene		5	GC14P048425	1.31617	https://www.genecards.org/cgi-bin/carddisp.pl?gene=HSALNG0100844
HSALNG0103961		RNA Gene		5	GC14P117088	1.31617	https://www.genecards.org/cgi-bin/carddisp.pl?gene=HSALNG0103961
HSALNG0113091		RNA Gene		5	GC16P084021	1.31617	https://www.genecards.org/cgi-bin/carddisp.pl?gene=HSALNG0113091
HSALNG0134488		RNA Gene		5	GC22P076651	1.31617	https://www.genecards.org/cgi-bin/carddisp.pl?gene=HSALNG0134488
LOC105379107	Uncharacterized LOC105379107	RNA Gene		5	GC05P103670	1.31617	https://www.genecards.org/cgi-bin/carddisp.pl?gene=LOC105379107
RF00017-6688		RNA Gene		5	GC07P137958	1.31617	https://www.genecards.org/cgi-bin/carddisp.pl?gene=RF00017-6688
RF00017-6689		RNA Gene		5	GC07P137959	1.31617	https://www.genecards.org/cgi-bin/carddisp.pl?gene=RF00017-6689
lnc-EGR3-4		RNA Gene		5	GC08M022636	1.31617	https://www.genecards.org/cgi-bin/carddisp.pl?gene=lnc-EGR3-4
lnc-RPS24-7		RNA Gene		5	GC10P113651	1.31617	https://www.genecards.org/cgi-bin/carddisp.pl?gene=lnc-RPS24-7
lnc-SNRPD3-1		RNA Gene		5	GC22P024603	1.31617	https://www.genecards.org/cgi-bin/carddisp.pl?gene=lnc-SNRPD3-1
lnc-SORBS1-2		RNA Gene		5	GC10M095238	1.31617	https://www.genecards.org/cgi-bin/carddisp.pl?gene=lnc-SORBS1-2
lnc-UGCG-4		RNA Gene		5	GC09P111969	1.31617	https://www.genecards.org/cgi-bin/carddisp.pl?gene=lnc-UGCG-4
CM034956-254		RNA Gene		4	GC06M130135	1.31617	https://www.genecards.org/cgi-bin/carddisp.pl?gene=CM034956-254
HSALNG0061327		RNA Gene		4	GC07P129835	1.31617	https://www.genecards.org/cgi-bin/carddisp.pl?gene=HSALNG0061327
HSALNG0106171		RNA Gene		4	GC15P166518	1.31617	https://www.genecards.org/cgi-bin/carddisp.pl?gene=HSALNG0106171
HSALNG0106172		RNA Gene		4	GC15M152749	1.31617	https://www.genecards.org/cgi-bin/carddisp.pl?gene=HSALNG0106172
LOC101929347	Uncharacterized LOC101929347	RNA Gene		4	GC10P112483	1.31617	https://www.genecards.org/cgi-bin/carddisp.pl?gene=LOC101929347
RF00017-4846		RNA Gene		4	GC05P103712	1.31617	https://www.genecards.org/cgi-bin/carddisp.pl?gene=RF00017-4846
RF00017-6962		RNA Gene		4	GC08P024587	1.31617	https://www.genecards.org/cgi-bin/carddisp.pl?gene=RF00017-6962
RF00017-713		RNA Gene		4	GC10P115926	1.31617	https://www.genecards.org/cgi-bin/carddisp.pl?gene=RF00017-713
RF00017-7798		RNA Gene		4	GC09P101975	1.31617	https://www.genecards.org/cgi-bin/carddisp.pl?gene=RF00017-7798
lnc-C12orf43-3		RNA Gene		4	GC12M123805	1.31617	https://www.genecards.org/cgi-bin/carddisp.pl?gene=lnc-C12orf43-3
lnc-MTR-1		RNA Gene		4	GC01P236908	1.31617	https://www.genecards.org/cgi-bin/carddisp.pl?gene=lnc-MTR-1
lnc-POP5-3		RNA Gene		4	GC12M124077	1.31617	https://www.genecards.org/cgi-bin/carddisp.pl?gene=lnc-POP5-3
lnc-SPECC1L-1		RNA Gene		4	GC22P075616	1.31617	https://www.genecards.org/cgi-bin/carddisp.pl?gene=lnc-SPECC1L-1
lnc-ZC3HC1-3		RNA Gene		4	GC07M129834	1.31617	https://www.genecards.org/cgi-bin/carddisp.pl?gene=lnc-ZC3HC1-3
piR-36756-025		RNA Gene		4	GC11M036416	1.31617	https://www.genecards.org/cgi-bin/carddisp.pl?gene=piR-36756-025
piR-45396		RNA Gene		4	GC12M124101	1.31617	https://www.genecards.org/cgi-bin/carddisp.pl?gene=piR-45396
piR-52471-009		RNA Gene		4	GC08M022639	1.31617	https://www.genecards.org/cgi-bin/carddisp.pl?gene=piR-52471-009
piR-61945-052		RNA Gene		4	GC10P115920	1.31617	https://www.genecards.org/cgi-bin/carddisp.pl?gene=piR-61945-052
HSALNG0030853		RNA Gene		3	GC03P176848	1.31617	https://www.genecards.org/cgi-bin/carddisp.pl?gene=HSALNG0030853
HSALNG0030856		RNA Gene		3	GC03M176941	1.31617	https://www.genecards.org/cgi-bin/carddisp.pl?gene=HSALNG0030856
HSALNG0033846		RNA Gene		3	GC04M037774	1.31617	https://www.genecards.org/cgi-bin/carddisp.pl?gene=HSALNG0033846
HSALNG0072623		RNA Gene		3	GC09P089783	1.31617	https://www.genecards.org/cgi-bin/carddisp.pl?gene=HSALNG0072623
lnc-GPR65-8		RNA Gene		3	GC14P087094	1.31617	https://www.genecards.org/cgi-bin/carddisp.pl?gene=lnc-GPR65-8
piR-50443-349		RNA Gene		3	GC04M024634	1.31617	https://www.genecards.org/cgi-bin/carddisp.pl?gene=piR-50443-349
piR-55157-005		RNA Gene		3	GC22P080460	1.31617	https://www.genecards.org/cgi-bin/carddisp.pl?gene=piR-55157-005
LOC105373218	Uncharacterized LOC105373218	RNA Gene		2	GC01P236912	1.31617	https://www.genecards.org/cgi-bin/carddisp.pl?gene=LOC105373218
LOC124903018	Uncharacterized LOC124903018	RNA Gene		2	GC12P111189	1.31617	https://www.genecards.org/cgi-bin/carddisp.pl?gene=LOC124903018
BCL2	BCL2 Apoptosis Regulator	Protein Coding	P10415	64	GC18M063123	1.19805	https://www.genecards.org/cgi-bin/carddisp.pl?gene=BCL2
AFP	Alpha Fetoprotein	Protein Coding	P02771	60	GC04P073431	1.19805	https://www.genecards.org/cgi-bin/carddisp.pl?gene=AFP
CCND1	Cyclin D1	Protein Coding	P24385	66	GC11P069641	1.08069	https://www.genecards.org/cgi-bin/carddisp.pl?gene=CCND1
MIR7-3HG	MIR7-3 Host Gene	RNA Gene	Q8N6C7	35	GC19P122009	1.06014	https://www.genecards.org/cgi-bin/carddisp.pl?gene=MIR7-3HG
KRT8	Keratin 8	Protein Coding	P05787	60	GC12M052897	0.939715	https://www.genecards.org/cgi-bin/carddisp.pl?gene=KRT8
IL1B	Interleukin 1 Beta	Protein Coding	P01584	60	GC02M112829	0.801392	https://www.genecards.org/cgi-bin/carddisp.pl?gene=IL1B
MYC	MYC Proto-Oncogene, BHLH Transcription Factor	Protein Coding	P01106	66	GC08P127735	0.797356	https://www.genecards.org/cgi-bin/carddisp.pl?gene=MYC
ALK	ALK Receptor Tyrosine Kinase	Protein Coding	Q9UM73	64	GC02M029190	0.797356	https://www.genecards.org/cgi-bin/carddisp.pl?gene=ALK
CD19	CD19 Molecule	Protein Coding	P15391	64	GC16P096580	0.797356	https://www.genecards.org/cgi-bin/carddisp.pl?gene=CD19
CD4	CD4 Molecule	Protein Coding	P01730	63	GC12P006786	0.797356	https://www.genecards.org/cgi-bin/carddisp.pl?gene=CD4
MME	Membrane Metalloendopeptidase	Protein Coding	P08473	63	GC03P155024	0.797356	https://www.genecards.org/cgi-bin/carddisp.pl?gene=MME
NCAM1	Neural Cell Adhesion Molecule 1	Protein Coding	P13591	61	GC11P112961	0.797356	https://www.genecards.org/cgi-bin/carddisp.pl?gene=NCAM1
BCL6	BCL6 Transcription Repressor	Protein Coding	P41182	59	GC03M187721	0.797356	https://www.genecards.org/cgi-bin/carddisp.pl?gene=BCL6
CD38	CD38 Molecule	Protein Coding	P28907	59	GC04P025740	0.797356	https://www.genecards.org/cgi-bin/carddisp.pl?gene=CD38
PAX5	Paired Box 5	Protein Coding	Q02548	59	GC09M037064	0.797356	https://www.genecards.org/cgi-bin/carddisp.pl?gene=PAX5
CD79B	CD79b Molecule	Protein Coding	P40259	58	GC17M063928	0.797356	https://www.genecards.org/cgi-bin/carddisp.pl?gene=CD79B
IRF4	Interferon Regulatory Factor 4	Protein Coding	Q15306	58	GC06P000391	0.797356	https://www.genecards.org/cgi-bin/carddisp.pl?gene=IRF4
PRDM1	PR/SET Domain 1	Protein Coding	O75626	58	GC06P145634	0.797356	https://www.genecards.org/cgi-bin/carddisp.pl?gene=PRDM1
CD2	CD2 Molecule	Protein Coding	P06729	57	GC01P116754	0.797356	https://www.genecards.org/cgi-bin/carddisp.pl?gene=CD2
SDC1	Syndecan 1	Protein Coding	P18827	56	GC02M020200	0.797356	https://www.genecards.org/cgi-bin/carddisp.pl?gene=SDC1
TNFRSF8	TNF Receptor Superfamily Member 8	Protein Coding	P28908	56	GC01P012063	0.797356	https://www.genecards.org/cgi-bin/carddisp.pl?gene=TNFRSF8
CD5	CD5 Molecule	Protein Coding	P06127	55	GC11P093434	0.797356	https://www.genecards.org/cgi-bin/carddisp.pl?gene=CD5
PDLIM7	PDZ And LIM Domain 7	Protein Coding	Q9NR12	54	GC05M177483	0.797356	https://www.genecards.org/cgi-bin/carddisp.pl?gene=PDLIM7
SPN	Sialophorin	Protein Coding	P16150	54	GC16P029662	0.797356	https://www.genecards.org/cgi-bin/carddisp.pl?gene=SPN
FUT4	Fucosyltransferase 4	Protein Coding	P22083	52	GC11P096335	0.797356	https://www.genecards.org/cgi-bin/carddisp.pl?gene=FUT4
VIL1	Villin 1	Protein Coding	P09327	51	GC02P218419	0.797356	https://www.genecards.org/cgi-bin/carddisp.pl?gene=VIL1
POU2AF1	POU Class 2 Homeobox Associating Factor 1	Protein Coding	Q16633	49	GC11M111352	0.797356	https://www.genecards.org/cgi-bin/carddisp.pl?gene=POU2AF1
LOC102723407	Immunoglobulin Heavy Variable 4-38-2-Like	Protein Coding		17	GC14P8B0041	0.797356	https://www.genecards.org/cgi-bin/carddisp.pl?gene=LOC102723407
NAFLD1	Fatty Liver Disease 1, Susceptiblity To	Genetic Locus		5	GC22U901005	0.797356	https://www.genecards.org/cgi-bin/carddisp.pl?gene=NAFLD1
NAFLD2	Fatty Liver Disease, Nonalcoholic, Susceptibility To, 2	Genetic Locus		4	GC11U901533	0.797356	https://www.genecards.org/cgi-bin/carddisp.pl?gene=NAFLD2
STAT3	Signal Transducer And Activator Of Transcription 3	Protein Coding	P40763	67	GC17M042313	0.694026	https://www.genecards.org/cgi-bin/carddisp.pl?gene=STAT3
CHI3L1	Chitinase 3 Like 1	Protein Coding	P36222	58	GC01M203148	0.694026	https://www.genecards.org/cgi-bin/carddisp.pl?gene=CHI3L1
CTRC	Chymotrypsin C	Protein Coding	Q99895	58	GC01P015438	0.694026	https://www.genecards.org/cgi-bin/carddisp.pl?gene=CTRC
PRL	Prolactin	Protein Coding	P01236	56	GC06M022287	0.694026	https://www.genecards.org/cgi-bin/carddisp.pl?gene=PRL
HK3	Hexokinase 3	Protein Coding	P52790	52	GC05M179484	0.694026	https://www.genecards.org/cgi-bin/carddisp.pl?gene=HK3
ASGR2	Asialoglycoprotein Receptor 2	Protein Coding	P07307	51	GC17M007101	0.694026	https://www.genecards.org/cgi-bin/carddisp.pl?gene=ASGR2
NAGK	N-Acetylglucosamine Kinase	Protein Coding	Q9UJ70	51	GC02P071064	0.694026	https://www.genecards.org/cgi-bin/carddisp.pl?gene=NAGK
CFTR	CF Transmembrane Conductance Regulator	Protein Coding	P13569	66	GC07P117287	0.633556	https://www.genecards.org/cgi-bin/carddisp.pl?gene=CFTR
TFR2	Transferrin Receptor 2	Protein Coding	Q9UP52	58	GC07M100620	0.633556	https://www.genecards.org/cgi-bin/carddisp.pl?gene=TFR2
SPINK1	Serine Peptidase Inhibitor Kazal Type 1	Protein Coding	P00995	55	GC05M147825	0.633556	https://www.genecards.org/cgi-bin/carddisp.pl?gene=SPINK1
PTEN	Phosphatase And Tensin Homolog	Protein Coding	P60484	65	GC10P112611	0.56667	https://www.genecards.org/cgi-bin/carddisp.pl?gene=PTEN
FAS	Fas Cell Surface Death Receptor	Protein Coding	P25445	64	GC10P112626	0.56667	https://www.genecards.org/cgi-bin/carddisp.pl?gene=FAS
NFKBIA	NFKB Inhibitor Alpha	Protein Coding	P25963	64	GC14M035401	0.56667	https://www.genecards.org/cgi-bin/carddisp.pl?gene=NFKBIA
IL6R	Interleukin 6 Receptor	Protein Coding	P08887	63	GC01P154405	0.56667	https://www.genecards.org/cgi-bin/carddisp.pl?gene=IL6R
VDR	Vitamin D Receptor	Protein Coding	P11473	62	GC12M047841	0.56667	https://www.genecards.org/cgi-bin/carddisp.pl?gene=VDR
CCR5	C-C Motif Chemokine Receptor 5	Protein Coding	P51681	60	GC03P059720	0.56667	https://www.genecards.org/cgi-bin/carddisp.pl?gene=CCR5
ABCB7	ATP Binding Cassette Subfamily B Member 7	Protein Coding	O75027	57	GC0XM075053	0.56667	https://www.genecards.org/cgi-bin/carddisp.pl?gene=ABCB7
CCL5	C-C Motif Chemokine Ligand 5	Protein Coding	P13501	56	GC17M035871	0.56667	https://www.genecards.org/cgi-bin/carddisp.pl?gene=CCL5
ADH7	Alcohol Dehydrogenase 7 (Class IV), Mu Or Sigma Polypeptide	Protein Coding	P40394	54	GC04M099412	0.56667	https://www.genecards.org/cgi-bin/carddisp.pl?gene=ADH7
FGF21	Fibroblast Growth Factor 21	Protein Coding	Q9NSA1	51	GC19P123383	0.56667	https://www.genecards.org/cgi-bin/carddisp.pl?gene=FGF21
PEMT	Phosphatidylethanolamine N-Methyltransferase	Protein Coding	Q9UBM1	51	GC17M084430	0.56667	https://www.genecards.org/cgi-bin/carddisp.pl?gene=PEMT
MPO	Myeloperoxidase	Protein Coding	P05164	66	GC17M058269	0.49075	https://www.genecards.org/cgi-bin/carddisp.pl?gene=MPO
NFKB1	Nuclear Factor Kappa B Subunit 1	Protein Coding	P19838	66	GC04P102501	0.49075	https://www.genecards.org/cgi-bin/carddisp.pl?gene=NFKB1
PPARG	Peroxisome Proliferator Activated Receptor Gamma	Protein Coding	P37231	66	GC03P012287	0.49075	https://www.genecards.org/cgi-bin/carddisp.pl?gene=PPARG
HK1	Hexokinase 1	Protein Coding	P19367	63	GC10P069269	0.49075	https://www.genecards.org/cgi-bin/carddisp.pl?gene=HK1
IFNG	Interferon Gamma	Protein Coding	P01579	63	GC12M068154	0.49075	https://www.genecards.org/cgi-bin/carddisp.pl?gene=IFNG
JUN	Jun Proto-Oncogene, AP-1 Transcription Factor Subunit	Protein Coding	P05412	63	GC01M058780	0.49075	https://www.genecards.org/cgi-bin/carddisp.pl?gene=JUN
GCK	Glucokinase	Protein Coding	P35557	62	GC07M045433	0.49075	https://www.genecards.org/cgi-bin/carddisp.pl?gene=GCK
CYCS	Cytochrome C, Somatic	Protein Coding	P99999	61	GC07M025118	0.49075	https://www.genecards.org/cgi-bin/carddisp.pl?gene=CYCS
XDH	Xanthine Dehydrogenase	Protein Coding	P47989	60	GC02M031334	0.49075	https://www.genecards.org/cgi-bin/carddisp.pl?gene=XDH
AKR1B1	Aldo-Keto Reductase Family 1 Member B	Protein Coding	P15121	59	GC07M134442	0.49075	https://www.genecards.org/cgi-bin/carddisp.pl?gene=AKR1B1
CXCL12	C-X-C Motif Chemokine Ligand 12	Protein Coding	P48061	59	GC10M044370	0.49075	https://www.genecards.org/cgi-bin/carddisp.pl?gene=CXCL12
F5	Coagulation Factor V	Protein Coding	P12259	59	GC01M169511	0.49075	https://www.genecards.org/cgi-bin/carddisp.pl?gene=F5
ISG15	ISG15 Ubiquitin Like Modifier	Protein Coding	P05161	59	GC01P001001	0.49075	https://www.genecards.org/cgi-bin/carddisp.pl?gene=ISG15
BID	BH3 Interacting Domain Death Agonist	Protein Coding	P55957	58	GC22M017734	0.49075	https://www.genecards.org/cgi-bin/carddisp.pl?gene=BID
PRSS1	Serine Protease 1	Protein Coding	P07477	57	GC07P159683	0.49075	https://www.genecards.org/cgi-bin/carddisp.pl?gene=PRSS1
TCN1	Transcobalamin 1	Protein Coding	P20061	54	GC11M128746	0.49075	https://www.genecards.org/cgi-bin/carddisp.pl?gene=TCN1
MBOAT7	Membrane Bound O-Acyltransferase Domain Containing 7	Protein Coding	Q96N66	52	GC19M054173	0.49075	https://www.genecards.org/cgi-bin/carddisp.pl?gene=MBOAT7
TM6SF2	Transmembrane 6 Superfamily Member 2	Protein Coding	Q9BZW4	43	GC19M019264	0.49075	https://www.genecards.org/cgi-bin/carddisp.pl?gene=TM6SF2
MIR21	MicroRNA 21	RNA Gene		33	GC17P123488	0.49075	https://www.genecards.org/cgi-bin/carddisp.pl?gene=MIR21
CHKB-CPT1B	CHKB-CPT1B Readthrough (NMD Candidate)	RNA Gene		26	GC22M050568	0.49075	https://www.genecards.org/cgi-bin/carddisp.pl?gene=CHKB-CPT1B
PGR-AS1	PGR Antisense RNA 1	RNA Gene		20	GC11P101131	0.49075	https://www.genecards.org/cgi-bin/carddisp.pl?gene=PGR-AS1
TRE-TTC3-1	TRNA-Glu (Anticodon TTC) 3-1	RNA Gene		18	GC01P051673	0.49075	https://www.genecards.org/cgi-bin/carddisp.pl?gene=TRE-TTC3-1
TRA-TGC7-1	TRNA-Ala (Anticodon TGC) 7-1	RNA Gene		15	GC06M096896	0.49075	https://www.genecards.org/cgi-bin/carddisp.pl?gene=TRA-TGC7-1
EGFR	Epidermal Growth Factor Receptor	Protein Coding	P00533	68	GC07P055019	0.400696	https://www.genecards.org/cgi-bin/carddisp.pl?gene=EGFR
BAX	BCL2 Associated X, Apoptosis Regulator	Protein Coding	Q07812	64	GC19P048954	0.400696	https://www.genecards.org/cgi-bin/carddisp.pl?gene=BAX
MMP13	Matrix Metallopeptidase 13	Protein Coding	P45452	63	GC11M102942	0.400696	https://www.genecards.org/cgi-bin/carddisp.pl?gene=MMP13
PCNA	Proliferating Cell Nuclear Antigen	Protein Coding	P12004	63	GC20M005114	0.400696	https://www.genecards.org/cgi-bin/carddisp.pl?gene=PCNA
ALOX5	Arachidonate 5-Lipoxygenase	Protein Coding	P09917	62	GC10P045374	0.400696	https://www.genecards.org/cgi-bin/carddisp.pl?gene=ALOX5
BCL2L1	BCL2 Like 1	Protein Coding	Q07817	62	GC20M031664	0.400696	https://www.genecards.org/cgi-bin/carddisp.pl?gene=BCL2L1
CASP3	Caspase 3	Protein Coding	P42574	62	GC04M184627	0.400696	https://www.genecards.org/cgi-bin/carddisp.pl?gene=CASP3
PRKN	Parkin RBR E3 Ubiquitin Protein Ligase	Protein Coding	O60260	62	GC06M161348	0.400696	https://www.genecards.org/cgi-bin/carddisp.pl?gene=PRKN
CYP3A4	Cytochrome P450 Family 3 Subfamily A Member 4	Protein Coding	P08684	61	GC07M105725	0.400696	https://www.genecards.org/cgi-bin/carddisp.pl?gene=CYP3A4
TGM2	Transglutaminase 2	Protein Coding	P21980	60	GC20M038127	0.400696	https://www.genecards.org/cgi-bin/carddisp.pl?gene=TGM2
CNR1	Cannabinoid Receptor 1	Protein Coding	P21554	59	GC06M088139	0.400696	https://www.genecards.org/cgi-bin/carddisp.pl?gene=CNR1
CYP2B6	Cytochrome P450 Family 2 Subfamily B Member 6	Protein Coding	P20813	59	GC19P040991	0.400696	https://www.genecards.org/cgi-bin/carddisp.pl?gene=CYP2B6
FADD	Fas Associated Via Death Domain	Protein Coding	Q13158	59	GC11P070203	0.400696	https://www.genecards.org/cgi-bin/carddisp.pl?gene=FADD
IL2	Interleukin 2	Protein Coding	P60568	59	GC04M122451	0.400696	https://www.genecards.org/cgi-bin/carddisp.pl?gene=IL2
OGDH	Oxoglutarate Dehydrogenase	Protein Coding	Q02218	59	GC07P044606	0.400696	https://www.genecards.org/cgi-bin/carddisp.pl?gene=OGDH
RELB	RELB Proto-Oncogene, NF-KB Subunit	Protein Coding	Q01201	59	GC19P123248	0.400696	https://www.genecards.org/cgi-bin/carddisp.pl?gene=RELB
XBP1	X-Box Binding Protein 1	Protein Coding	P17861	59	GC22M028794	0.400696	https://www.genecards.org/cgi-bin/carddisp.pl?gene=XBP1
AVP	Arginine Vasopressin	Protein Coding	P01185	58	GC20M003082	0.400696	https://www.genecards.org/cgi-bin/carddisp.pl?gene=AVP
CRAT	Carnitine O-Acetyltransferase	Protein Coding	P43155	58	GC09M129094	0.400696	https://www.genecards.org/cgi-bin/carddisp.pl?gene=CRAT
IL1A	Interleukin 1 Alpha	Protein Coding	P01583	58	GC02M112773	0.400696	https://www.genecards.org/cgi-bin/carddisp.pl?gene=IL1A
ST3GAL3	ST3 Beta-Galactoside Alpha-2,3-Sialyltransferase 3	Protein Coding	Q11203	58	GC01P043705	0.400696	https://www.genecards.org/cgi-bin/carddisp.pl?gene=ST3GAL3
ST6GAL1	ST6 Beta-Galactoside Alpha-2,6-Sialyltransferase 1	Protein Coding	P15907	58	GC03P186930	0.400696	https://www.genecards.org/cgi-bin/carddisp.pl?gene=ST6GAL1
UQCRC2	Ubiquinol-Cytochrome C Reductase Core Protein 2	Protein Coding	P22695	58	GC16P096351	0.400696	https://www.genecards.org/cgi-bin/carddisp.pl?gene=UQCRC2
UROD	Uroporphyrinogen Decarboxylase	Protein Coding	P06132	58	GC01P055469	0.400696	https://www.genecards.org/cgi-bin/carddisp.pl?gene=UROD
ADIPOR1	Adiponectin Receptor 1	Protein Coding	Q96A54	57	GC01M202940	0.400696	https://www.genecards.org/cgi-bin/carddisp.pl?gene=ADIPOR1
SELE	Selectin E	Protein Coding	P16581	57	GC01M169722	0.400696	https://www.genecards.org/cgi-bin/carddisp.pl?gene=SELE
AKR1C1	Aldo-Keto Reductase Family 1 Member C1	Protein Coding	Q04828	56	GC10P004963	0.400696	https://www.genecards.org/cgi-bin/carddisp.pl?gene=AKR1C1
ESRRG	Estrogen Related Receptor Gamma	Protein Coding	P62508	56	GC01M216503	0.400696	https://www.genecards.org/cgi-bin/carddisp.pl?gene=ESRRG
HJV	Hemojuvelin BMP Co-Receptor	Protein Coding	Q6ZVN8	56	GC01M163502	0.400696	https://www.genecards.org/cgi-bin/carddisp.pl?gene=HJV
ADH1A	Alcohol Dehydrogenase 1A (Class I), Alpha Polypeptide	Protein Coding	P07327	55	GC04M099276	0.400696	https://www.genecards.org/cgi-bin/carddisp.pl?gene=ADH1A
FABP2	Fatty Acid Binding Protein 2	Protein Coding	P12104	54	GC04M119317	0.400696	https://www.genecards.org/cgi-bin/carddisp.pl?gene=FABP2
STING1	Stimulator Of Interferon Response CGAMP Interactor 1	Protein Coding	Q86WV6	54	GC05M139495	0.400696	https://www.genecards.org/cgi-bin/carddisp.pl?gene=STING1
COL14A1	Collagen Type XIV Alpha 1 Chain	Protein Coding	Q05707	53	GC08P120109	0.400696	https://www.genecards.org/cgi-bin/carddisp.pl?gene=COL14A1
GOLM1	Golgi Membrane Protein 1	Protein Coding	Q8NBJ4	53	GC09M086026	0.400696	https://www.genecards.org/cgi-bin/carddisp.pl?gene=GOLM1
AKR7A2	Aldo-Keto Reductase Family 7 Member A2	Protein Coding	O43488	49	GC01M019302	0.400696	https://www.genecards.org/cgi-bin/carddisp.pl?gene=AKR7A2
CERS6	Ceramide Synthase 6	Protein Coding	Q6ZMG9	49	GC02P168472	0.400696	https://www.genecards.org/cgi-bin/carddisp.pl?gene=CERS6
SMAD5-AS1	SMAD5 Antisense RNA 1	RNA Gene	Q9Y6J3	31	GC05M136129	0.400696	https://www.genecards.org/cgi-bin/carddisp.pl?gene=SMAD5-AS1
HULC	Hepatocellular Carcinoma Up-Regulated Long Non-Coding RNA	RNA Gene		29	GC06P008486	0.400696	https://www.genecards.org/cgi-bin/carddisp.pl?gene=HULC
MIR215	MicroRNA 215	RNA Gene		28	GC01M220117	0.400696	https://www.genecards.org/cgi-bin/carddisp.pl?gene=MIR215
TMX2-CTNND1	TMX2-CTNND1 Readthrough (NMD Candidate)	RNA Gene		25	GC11P057712	0.400696	https://www.genecards.org/cgi-bin/carddisp.pl?gene=TMX2-CTNND1
ABL1	ABL Proto-Oncogene 1, Non-Receptor Tyrosine Kinase	Protein Coding	P00519	66	GC09P130713	0.283335	https://www.genecards.org/cgi-bin/carddisp.pl?gene=ABL1
CTNNB1	Catenin Beta 1	Protein Coding	P35222	66	GC03P041194	0.283335	https://www.genecards.org/cgi-bin/carddisp.pl?gene=CTNNB1
MMP9	Matrix Metallopeptidase 9	Protein Coding	P14780	66	GC20P046008	0.283335	https://www.genecards.org/cgi-bin/carddisp.pl?gene=MMP9
SMAD3	SMAD Family Member 3	Protein Coding	P84022	66	GC15P067063	0.283335	https://www.genecards.org/cgi-bin/carddisp.pl?gene=SMAD3
TP53	Tumor Protein P53	Protein Coding	P04637	66	GC17M007661	0.283335	https://www.genecards.org/cgi-bin/carddisp.pl?gene=TP53
UCHL1	Ubiquitin C-Terminal Hydrolase L1	Protein Coding	P09936	66	GC04P041256	0.283335	https://www.genecards.org/cgi-bin/carddisp.pl?gene=UCHL1
CASP8	Caspase 8	Protein Coding	Q14790	65	GC02P201233	0.283335	https://www.genecards.org/cgi-bin/carddisp.pl?gene=CASP8
ACE	Angiotensin I Converting Enzyme	Protein Coding	P12821	64	GC17P063477	0.283335	https://www.genecards.org/cgi-bin/carddisp.pl?gene=ACE
CA2	Carbonic Anhydrase 2	Protein Coding	P00918	64	GC08P085463	0.283335	https://www.genecards.org/cgi-bin/carddisp.pl?gene=CA2
CDKN2A	Cyclin Dependent Kinase Inhibitor 2A	Protein Coding	Q8N726	64	GC09M021967	0.283335	https://www.genecards.org/cgi-bin/carddisp.pl?gene=CDKN2A
DDR2	Discoidin Domain Receptor Tyrosine Kinase 2	Protein Coding	Q16832	64	GC01P167752	0.283335	https://www.genecards.org/cgi-bin/carddisp.pl?gene=DDR2
FOXO1	Forkhead Box O1	Protein Coding	Q12778	64	GC13M040555	0.283335	https://www.genecards.org/cgi-bin/carddisp.pl?gene=FOXO1
MAPK14	Mitogen-Activated Protein Kinase 14	Protein Coding	Q16539	64	GC06P144902	0.283335	https://www.genecards.org/cgi-bin/carddisp.pl?gene=MAPK14
PPP2CA	Protein Phosphatase 2 Catalytic Subunit Alpha	Protein Coding	P67775	64	GC05M134194	0.283335	https://www.genecards.org/cgi-bin/carddisp.pl?gene=PPP2CA
SMARCA4	SWI/SNF Related, Matrix Associated, Actin Dependent Regulator Of Chromatin, Subfamily A, Member 4	Protein Coding	P51532	64	GC19P122306	0.283335	https://www.genecards.org/cgi-bin/carddisp.pl?gene=SMARCA4
CD36	CD36 Molecule (CD36 Blood Group)	Protein Coding	P16671	63	GC07P080369	0.283335	https://www.genecards.org/cgi-bin/carddisp.pl?gene=CD36
CD40	CD40 Molecule	Protein Coding	P25942	63	GC20P046118	0.283335	https://www.genecards.org/cgi-bin/carddisp.pl?gene=CD40
CD40LG	CD40 Ligand	Protein Coding	P29965	63	GC0XP136649	0.283335	https://www.genecards.org/cgi-bin/carddisp.pl?gene=CD40LG
HNF4A	Hepatocyte Nuclear Factor 4 Alpha	Protein Coding	P41235	63	GC20P044355	0.283335	https://www.genecards.org/cgi-bin/carddisp.pl?gene=HNF4A
ITGB2	Integrin Subunit Beta 2	Protein Coding	P05107	63	GC21M044885	0.283335	https://www.genecards.org/cgi-bin/carddisp.pl?gene=ITGB2
SERPINC1	Serpin Family C Member 1	Protein Coding	P01008	63	GC01M175000	0.283335	https://www.genecards.org/cgi-bin/carddisp.pl?gene=SERPINC1
ACACA	Acetyl-CoA Carboxylase Alpha	Protein Coding	Q13085	62	GC17M037084	0.283335	https://www.genecards.org/cgi-bin/carddisp.pl?gene=ACACA
CDH1	Cadherin 1	Protein Coding	P12830	62	GC16P068737	0.283335	https://www.genecards.org/cgi-bin/carddisp.pl?gene=CDH1
CDKN1B	Cyclin Dependent Kinase Inhibitor 1B	Protein Coding	P46527	62	GC12P043095	0.283335	https://www.genecards.org/cgi-bin/carddisp.pl?gene=CDKN1B
CES1	Carboxylesterase 1	Protein Coding	P23141	62	GC16M055836	0.283335	https://www.genecards.org/cgi-bin/carddisp.pl?gene=CES1
FASN	Fatty Acid Synthase	Protein Coding	P49327	62	GC17M082078	0.283335	https://www.genecards.org/cgi-bin/carddisp.pl?gene=FASN
MAPK8	Mitogen-Activated Protein Kinase 8	Protein Coding	P45983	62	GC10P048306	0.283335	https://www.genecards.org/cgi-bin/carddisp.pl?gene=MAPK8
MLH1	MutL Homolog 1	Protein Coding	P40692	62	GC03P036993	0.283335	https://www.genecards.org/cgi-bin/carddisp.pl?gene=MLH1
NOS2	Nitric Oxide Synthase 2	Protein Coding	P35228	62	GC17M027756	0.283335	https://www.genecards.org/cgi-bin/carddisp.pl?gene=NOS2
PMS2	PMS1 Homolog 2, Mismatch Repair System Component	Protein Coding	P54278	62	GC07M005973	0.283335	https://www.genecards.org/cgi-bin/carddisp.pl?gene=PMS2
TBP	TATA-Box Binding Protein	Protein Coding	P20226	62	GC06P170554	0.283335	https://www.genecards.org/cgi-bin/carddisp.pl?gene=TBP
ZEB1	Zinc Finger E-Box Binding Homeobox 1	Protein Coding	P37275	62	GC10P031318	0.283335	https://www.genecards.org/cgi-bin/carddisp.pl?gene=ZEB1
ATP7B	ATPase Copper Transporting Beta	Protein Coding	P35670	61	GC13M051930	0.283335	https://www.genecards.org/cgi-bin/carddisp.pl?gene=ATP7B
EPCAM	Epithelial Cell Adhesion Molecule	Protein Coding	P16422	61	GC02P047345	0.283335	https://www.genecards.org/cgi-bin/carddisp.pl?gene=EPCAM
FAAH	Fatty Acid Amide Hydrolase	Protein Coding	O00519	61	GC01P046394	0.283335	https://www.genecards.org/cgi-bin/carddisp.pl?gene=FAAH
GFAP	Glial Fibrillary Acidic Protein	Protein Coding	P14136	61	GC17M085348	0.283335	https://www.genecards.org/cgi-bin/carddisp.pl?gene=GFAP
PGM1	Phosphoglucomutase 1	Protein Coding	P36871	61	GC01P063593	0.283335	https://www.genecards.org/cgi-bin/carddisp.pl?gene=PGM1
SLC11A2	Solute Carrier Family 11 Member 2	Protein Coding	P49281	61	GC12M050952	0.283335	https://www.genecards.org/cgi-bin/carddisp.pl?gene=SLC11A2
VEGFA	Vascular Endothelial Growth Factor A	Protein Coding	P15692	61	GC06P043770	0.283335	https://www.genecards.org/cgi-bin/carddisp.pl?gene=VEGFA
C1S	Complement C1s	Protein Coding	P09871	60	GC12P042133	0.283335	https://www.genecards.org/cgi-bin/carddisp.pl?gene=C1S
C5	Complement C5	Protein Coding	P01031	60	GC09M120933	0.283335	https://www.genecards.org/cgi-bin/carddisp.pl?gene=C5
CASP2	Caspase 2	Protein Coding	P42575	60	GC07P159710	0.283335	https://www.genecards.org/cgi-bin/carddisp.pl?gene=CASP2
COL4A1	Collagen Type IV Alpha 1 Chain	Protein Coding	P02462	60	GC13M110148	0.283335	https://www.genecards.org/cgi-bin/carddisp.pl?gene=COL4A1
FOXO3	Forkhead Box O3	Protein Coding	O43524	60	GC06P108559	0.283335	https://www.genecards.org/cgi-bin/carddisp.pl?gene=FOXO3
ITGAL	Integrin Subunit Alpha L	Protein Coding	P20701	60	GC16P030472	0.283335	https://www.genecards.org/cgi-bin/carddisp.pl?gene=ITGAL
KL	Klotho	Protein Coding	Q9UEF7	60	GC13P033016	0.283335	https://www.genecards.org/cgi-bin/carddisp.pl?gene=KL
LPIN1	Lipin 1	Protein Coding	Q14693	60	GC02P011677	0.283335	https://www.genecards.org/cgi-bin/carddisp.pl?gene=LPIN1
LRP6	LDL Receptor Related Protein 6	Protein Coding	O75581	60	GC12M030861	0.283335	https://www.genecards.org/cgi-bin/carddisp.pl?gene=LRP6
MSH2	MutS Homolog 2	Protein Coding	P43246	60	GC02P047403	0.283335	https://www.genecards.org/cgi-bin/carddisp.pl?gene=MSH2
NCF2	Neutrophil Cytosolic Factor 2	Protein Coding	P19878	60	GC01M186050	0.283335	https://www.genecards.org/cgi-bin/carddisp.pl?gene=NCF2
SIRT3	Sirtuin 3	Protein Coding	Q9NTG7	60	GC11M000215	0.283335	https://www.genecards.org/cgi-bin/carddisp.pl?gene=SIRT3
SLC16A1	Solute Carrier Family 16 Member 1	Protein Coding	P53985	60	GC01M113114	0.283335	https://www.genecards.org/cgi-bin/carddisp.pl?gene=SLC16A1
TPO	Thyroid Peroxidase	Protein Coding	P07202	60	GC02P001374	0.283335	https://www.genecards.org/cgi-bin/carddisp.pl?gene=TPO
YAP1	Yes1 Associated Transcriptional Regulator	Protein Coding	P46937	60	GC11P102110	0.283335	https://www.genecards.org/cgi-bin/carddisp.pl?gene=YAP1
APOB	Apolipoprotein B	Protein Coding	P04114	59	GC02M020956	0.283335	https://www.genecards.org/cgi-bin/carddisp.pl?gene=APOB
CEBPA	CCAAT Enhancer Binding Protein Alpha	Protein Coding	P49715	59	GC19M033299	0.283335	https://www.genecards.org/cgi-bin/carddisp.pl?gene=CEBPA
COL4A2	Collagen Type IV Alpha 2 Chain	Protein Coding	P08572	59	GC13P110305	0.283335	https://www.genecards.org/cgi-bin/carddisp.pl?gene=COL4A2
COL4A3	Collagen Type IV Alpha 3 Chain	Protein Coding	Q01955	59	GC02P227164	0.283335	https://www.genecards.org/cgi-bin/carddisp.pl?gene=COL4A3
FGF23	Fibroblast Growth Factor 23	Protein Coding	Q9GZV9	59	GC12M004368	0.283335	https://www.genecards.org/cgi-bin/carddisp.pl?gene=FGF23
FTL	Ferritin Light Chain	Protein Coding	P02792	59	GC19P048965	0.283335	https://www.genecards.org/cgi-bin/carddisp.pl?gene=FTL
MAT2A	Methionine Adenosyltransferase 2A	Protein Coding	P31153	59	GC02P086687	0.283335	https://www.genecards.org/cgi-bin/carddisp.pl?gene=MAT2A
MBL2	Mannose Binding Lectin 2	Protein Coding	P11226	59	GC10M052760	0.283335	https://www.genecards.org/cgi-bin/carddisp.pl?gene=MBL2
PML	PML Nuclear Body Scaffold	Protein Coding	P29590	59	GC15P073994	0.283335	https://www.genecards.org/cgi-bin/carddisp.pl?gene=PML
PROM1	Prominin 1	Protein Coding	O43490	59	GC04M015965	0.283335	https://www.genecards.org/cgi-bin/carddisp.pl?gene=PROM1
PTGER4	Prostaglandin E Receptor 4	Protein Coding	P35408	59	GC05P040679	0.283335	https://www.genecards.org/cgi-bin/carddisp.pl?gene=PTGER4
SP1	Sp1 Transcription Factor	Protein Coding	P08047	59	GC12P053380	0.283335	https://www.genecards.org/cgi-bin/carddisp.pl?gene=SP1
AKR1C4	Aldo-Keto Reductase Family 1 Member C4	Protein Coding	P17516	58	GC10P005195	0.283335	https://www.genecards.org/cgi-bin/carddisp.pl?gene=AKR1C4
ARRB2	Arrestin Beta 2	Protein Coding	P32121	58	GC17P121777	0.283335	https://www.genecards.org/cgi-bin/carddisp.pl?gene=ARRB2
BCL2L11	BCL2 Like 11	Protein Coding	O43521	58	GC02P111119	0.283335	https://www.genecards.org/cgi-bin/carddisp.pl?gene=BCL2L11
BTD	Biotinidase	Protein Coding	P43251	58	GC03P022930	0.283335	https://www.genecards.org/cgi-bin/carddisp.pl?gene=BTD
CD274	CD274 Molecule	Protein Coding	Q9NZQ7	58	GC09P005450	0.283335	https://www.genecards.org/cgi-bin/carddisp.pl?gene=CD274
CD34	CD34 Molecule	Protein Coding	P28906	58	GC01M207880	0.283335	https://www.genecards.org/cgi-bin/carddisp.pl?gene=CD34
CYP2A6	Cytochrome P450 Family 2 Subfamily A Member 6	Protein Coding	P11509	58	GC19M040843	0.283335	https://www.genecards.org/cgi-bin/carddisp.pl?gene=CYP2A6
EGR1	Early Growth Response 1	Protein Coding	P18146	58	GC05P138465	0.283335	https://www.genecards.org/cgi-bin/carddisp.pl?gene=EGR1
ELK1	ETS Transcription Factor ELK1	Protein Coding	P19419	58	GC0XM047635	0.283335	https://www.genecards.org/cgi-bin/carddisp.pl?gene=ELK1
GOT1	Glutamic-Oxaloacetic Transaminase 1	Protein Coding	P17174	58	GC10M099396	0.283335	https://www.genecards.org/cgi-bin/carddisp.pl?gene=GOT1
HP	Haptoglobin	Protein Coding	P00738	58	GC16P097888	0.283335	https://www.genecards.org/cgi-bin/carddisp.pl?gene=HP
IL5	Interleukin 5	Protein Coding	P05113	58	GC05M132541	0.283335	https://www.genecards.org/cgi-bin/carddisp.pl?gene=IL5
IREB2	Iron Responsive Element Binding Protein 2	Protein Coding	P48200	58	GC15P078437	0.283335	https://www.genecards.org/cgi-bin/carddisp.pl?gene=IREB2
IRF3	Interferon Regulatory Factor 3	Protein Coding	Q14653	58	GC19M049659	0.283335	https://www.genecards.org/cgi-bin/carddisp.pl?gene=IRF3
LGALS3	Galectin 3	Protein Coding	P17931	58	GC14P055124	0.283335	https://www.genecards.org/cgi-bin/carddisp.pl?gene=LGALS3
SAG	S-Antigen Visual Arrestin	Protein Coding	P10523	58	GC02P233663	0.283335	https://www.genecards.org/cgi-bin/carddisp.pl?gene=SAG
SHC1	SHC Adaptor Protein 1	Protein Coding	P29353	58	GC01M154962	0.283335	https://www.genecards.org/cgi-bin/carddisp.pl?gene=SHC1
ADH4	Alcohol Dehydrogenase 4 (Class II), Pi Polypeptide	Protein Coding	P08319	57	GC04M099123	0.283335	https://www.genecards.org/cgi-bin/carddisp.pl?gene=ADH4
ADH5	Alcohol Dehydrogenase 5 (Class III), Chi Polypeptide	Protein Coding	P11766	57	GC04M099070	0.283335	https://www.genecards.org/cgi-bin/carddisp.pl?gene=ADH5
BAD	BCL2 Associated Agonist Of Cell Death	Protein Coding	Q92934	57	GC11M128946	0.283335	https://www.genecards.org/cgi-bin/carddisp.pl?gene=BAD
BAK1	BCL2 Antagonist/Killer 1	Protein Coding	Q16611	57	GC06M033572	0.283335	https://www.genecards.org/cgi-bin/carddisp.pl?gene=BAK1
COL4A5	Collagen Type IV Alpha 5 Chain	Protein Coding	P29400	57	GC0XP108439	0.283335	https://www.genecards.org/cgi-bin/carddisp.pl?gene=COL4A5
DLK1	Delta Like Non-Canonical Notch Ligand 1	Protein Coding	P80370	57	GC14P117036	0.283335	https://www.genecards.org/cgi-bin/carddisp.pl?gene=DLK1
IL13	Interleukin 13	Protein Coding	P35225	57	GC05P132656	0.283335	https://www.genecards.org/cgi-bin/carddisp.pl?gene=IL13
SALL4	Spalt Like Transcription Factor 4	Protein Coding	Q9UJQ4	57	GC20M051784	0.283335	https://www.genecards.org/cgi-bin/carddisp.pl?gene=SALL4
ACO1	Aconitase 1	Protein Coding	P21399	56	GC09P032374	0.283335	https://www.genecards.org/cgi-bin/carddisp.pl?gene=ACO1
ALPP	Alkaline Phosphatase, Placental	Protein Coding	P05187	56	GC02P232378	0.283335	https://www.genecards.org/cgi-bin/carddisp.pl?gene=ALPP
COL4A4	Collagen Type IV Alpha 4 Chain	Protein Coding	P53420	56	GC02M226973	0.283335	https://www.genecards.org/cgi-bin/carddisp.pl?gene=COL4A4
CTSG	Cathepsin G	Protein Coding	P08311	56	GC14M024573	0.283335	https://www.genecards.org/cgi-bin/carddisp.pl?gene=CTSG
FGF19	Fibroblast Growth Factor 19	Protein Coding	O95750	56	GC11M129189	0.283335	https://www.genecards.org/cgi-bin/carddisp.pl?gene=FGF19
GAS6	Growth Arrest Specific 6	Protein Coding	Q14393	56	GC13M113820	0.283335	https://www.genecards.org/cgi-bin/carddisp.pl?gene=GAS6
SOCS3	Suppressor Of Cytokine Signaling 3	Protein Coding	O14543	56	GC17M078356	0.283335	https://www.genecards.org/cgi-bin/carddisp.pl?gene=SOCS3
SOST	Sclerostin	Protein Coding	Q9BQB4	56	GC17M043753	0.283335	https://www.genecards.org/cgi-bin/carddisp.pl?gene=SOST
BCL2L2	BCL2 Like 2	Protein Coding	Q92843	55	GC14P048540	0.283335	https://www.genecards.org/cgi-bin/carddisp.pl?gene=BCL2L2
COL4A6	Collagen Type IV Alpha 6 Chain	Protein Coding	Q14031	55	GC0XM108155	0.283335	https://www.genecards.org/cgi-bin/carddisp.pl?gene=COL4A6
DGAT2	Diacylglycerol O-Acyltransferase 2	Protein Coding	Q96PD7	55	GC11P075759	0.283335	https://www.genecards.org/cgi-bin/carddisp.pl?gene=DGAT2
LIMK2	LIM Domain Kinase 2	Protein Coding	P53671	55	GC22P031212	0.283335	https://www.genecards.org/cgi-bin/carddisp.pl?gene=LIMK2
PSMC1	Proteasome 26S Subunit, ATPase 1	Protein Coding	P62191	55	GC14P090256	0.283335	https://www.genecards.org/cgi-bin/carddisp.pl?gene=PSMC1
SLC25A10	Solute Carrier Family 25 Member 10	Protein Coding	Q9UBX3	55	GC17P081712	0.283335	https://www.genecards.org/cgi-bin/carddisp.pl?gene=SLC25A10
ALCAM	Activated Leukocyte Cell Adhesion Molecule	Protein Coding	Q13740	54	GC03P105366	0.283335	https://www.genecards.org/cgi-bin/carddisp.pl?gene=ALCAM
ASGR1	Asialoglycoprotein Receptor 1	Protein Coding	P07306	54	GC17M007173	0.283335	https://www.genecards.org/cgi-bin/carddisp.pl?gene=ASGR1
CEACAM3	CEA Cell Adhesion Molecule 3	Protein Coding	P40198	54	GC19P041796	0.283335	https://www.genecards.org/cgi-bin/carddisp.pl?gene=CEACAM3
CIDEC	Cell Death Inducing DFFA Like Effector C	Protein Coding	Q96AQ7	54	GC03M009866	0.283335	https://www.genecards.org/cgi-bin/carddisp.pl?gene=CIDEC
ERP44	Endoplasmic Reticulum Protein 44	Protein Coding	Q9BS26	54	GC09M099979	0.283335	https://www.genecards.org/cgi-bin/carddisp.pl?gene=ERP44
KRT20	Keratin 20	Protein Coding	P35900	54	GC17M040875	0.283335	https://www.genecards.org/cgi-bin/carddisp.pl?gene=KRT20
PIAS3	Protein Inhibitor Of Activated STAT 3	Protein Coding	Q9Y6X2	54	GC01M145848	0.283335	https://www.genecards.org/cgi-bin/carddisp.pl?gene=PIAS3
RREB1	Ras Responsive Element Binding Protein 1	Protein Coding	Q92766	54	GC06P007107	0.283335	https://www.genecards.org/cgi-bin/carddisp.pl?gene=RREB1
SLC25A11	Solute Carrier Family 25 Member 11	Protein Coding	Q02978	54	GC17M004937	0.283335	https://www.genecards.org/cgi-bin/carddisp.pl?gene=SLC25A11
SLC7A1	Solute Carrier Family 7 Member 1	Protein Coding	P30825	54	GC13M029509	0.283335	https://www.genecards.org/cgi-bin/carddisp.pl?gene=SLC7A1
SLPI	Secretory Leukocyte Peptidase Inhibitor	Protein Coding	P03973	54	GC20M045252	0.283335	https://www.genecards.org/cgi-bin/carddisp.pl?gene=SLPI
FSTL1	Follistatin Like 1	Protein Coding	Q12841	53	GC03M120392	0.283335	https://www.genecards.org/cgi-bin/carddisp.pl?gene=FSTL1
ORM1	Orosomucoid 1	Protein Coding	P02763	53	GC09P114323	0.283335	https://www.genecards.org/cgi-bin/carddisp.pl?gene=ORM1
PDIA4	Protein Disulfide Isomerase Family A Member 4	Protein Coding	P13667	53	GC07M149003	0.283335	https://www.genecards.org/cgi-bin/carddisp.pl?gene=PDIA4
SLC25A21	Solute Carrier Family 25 Member 21	Protein Coding	Q9BQT8	53	GC14M036677	0.283335	https://www.genecards.org/cgi-bin/carddisp.pl?gene=SLC25A21
TRA2B	Transformer 2 Beta Homolog	Protein Coding	P62995	53	GC03M185914	0.283335	https://www.genecards.org/cgi-bin/carddisp.pl?gene=TRA2B
CCR9	C-C Motif Chemokine Receptor 9	Protein Coding	P51686	52	GC03P059706	0.283335	https://www.genecards.org/cgi-bin/carddisp.pl?gene=CCR9
CXCL2	C-X-C Motif Chemokine Ligand 2	Protein Coding	P19875	52	GC04M074097	0.283335	https://www.genecards.org/cgi-bin/carddisp.pl?gene=CXCL2
IL1RAPL2	Interleukin 1 Receptor Accessory Protein Like 2	Protein Coding	Q9NP60	52	GC0XP104566	0.283335	https://www.genecards.org/cgi-bin/carddisp.pl?gene=IL1RAPL2
NEDD8	NEDD8 Ubiquitin Like Modifier	Protein Coding	Q15843	52	GC14M024216	0.283335	https://www.genecards.org/cgi-bin/carddisp.pl?gene=NEDD8
PDIA2	Protein Disulfide Isomerase Family A Member 2	Protein Coding	Q13087	52	GC16P095736	0.283335	https://www.genecards.org/cgi-bin/carddisp.pl?gene=PDIA2
PPIG	Peptidylprolyl Isomerase G	Protein Coding	Q13427	52	GC02P169584	0.283335	https://www.genecards.org/cgi-bin/carddisp.pl?gene=PPIG
C1QTNF3	C1q And TNF Related 3	Protein Coding	Q9BXJ4	51	GC05M034017	0.283335	https://www.genecards.org/cgi-bin/carddisp.pl?gene=C1QTNF3
LGALS9	Galectin 9	Protein Coding	O00182	51	GC17P027629	0.283335	https://www.genecards.org/cgi-bin/carddisp.pl?gene=LGALS9
IL32	Interleukin 32	Protein Coding	P24001	50	GC16P095843	0.283335	https://www.genecards.org/cgi-bin/carddisp.pl?gene=IL32
MAGEA4	MAGE Family Member A4	Protein Coding	P43358	50	GC0XP151912	0.283335	https://www.genecards.org/cgi-bin/carddisp.pl?gene=MAGEA4
MFAP4	Microfibril Associated Protein 4	Protein Coding	P55083	50	GC17M019383	0.283335	https://www.genecards.org/cgi-bin/carddisp.pl?gene=MFAP4
TMX2	Thioredoxin Related Transmembrane Protein 2	Protein Coding	Q9Y320	50	GC11P058836	0.283335	https://www.genecards.org/cgi-bin/carddisp.pl?gene=TMX2
TMX3	Thioredoxin Related Transmembrane Protein 3	Protein Coding	Q96JJ7	50	GC18M068673	0.283335	https://www.genecards.org/cgi-bin/carddisp.pl?gene=TMX3
IFNL3	Interferon Lambda 3	Protein Coding	Q8IZI9	49	GC19M039243	0.283335	https://www.genecards.org/cgi-bin/carddisp.pl?gene=IFNL3
CGAS	Cyclic GMP-AMP Synthase	Protein Coding	Q8N884	48	GC06M097672	0.283335	https://www.genecards.org/cgi-bin/carddisp.pl?gene=CGAS
CXCL14	C-X-C Motif Chemokine Ligand 14	Protein Coding	O95715	48	GC05M135617	0.283335	https://www.genecards.org/cgi-bin/carddisp.pl?gene=CXCL14
PDIA6	Protein Disulfide Isomerase Family A Member 6	Protein Coding	Q15084	48	GC02M010784	0.283335	https://www.genecards.org/cgi-bin/carddisp.pl?gene=PDIA6
TXNDC5	Thioredoxin Domain Containing 5	Protein Coding	Q8NBS9	48	GC06M007893	0.283335	https://www.genecards.org/cgi-bin/carddisp.pl?gene=TXNDC5
AGR3	Anterior Gradient 3, Protein Disulphide Isomerase Family Member	Protein Coding	Q8TD06	47	GC07M016854	0.283335	https://www.genecards.org/cgi-bin/carddisp.pl?gene=AGR3
ERP29	Endoplasmic Reticulum Protein 29	Protein Coding	P30040	47	GC12P112013	0.283335	https://www.genecards.org/cgi-bin/carddisp.pl?gene=ERP29
GNG2	G Protein Subunit Gamma 2	Protein Coding	P59768	47	GC14P051826	0.283335	https://www.genecards.org/cgi-bin/carddisp.pl?gene=GNG2
TMX4	Thioredoxin Related Transmembrane Protein 4	Protein Coding	Q9H1E5	47	GC20M007977	0.283335	https://www.genecards.org/cgi-bin/carddisp.pl?gene=TMX4
CYP20A1	Cytochrome P450 Family 20 Subfamily A Member 1	Protein Coding	Q6UW02	45	GC02P203238	0.283335	https://www.genecards.org/cgi-bin/carddisp.pl?gene=CYP20A1
DNAJC10	DnaJ Heat Shock Protein Family (Hsp40) Member C10	Protein Coding	Q8IXB1	45	GC02P182716	0.283335	https://www.genecards.org/cgi-bin/carddisp.pl?gene=DNAJC10
PDIA5	Protein Disulfide Isomerase Family A Member 5	Protein Coding	Q14554	45	GC03P123067	0.283335	https://www.genecards.org/cgi-bin/carddisp.pl?gene=PDIA5
SLU7	SLU7 Homolog, Splicing Factor	Protein Coding	O95391	45	GC05M160401	0.283335	https://www.genecards.org/cgi-bin/carddisp.pl?gene=SLU7
TMX1	Thioredoxin Related Transmembrane Protein 1	Protein Coding	Q9H3N1	45	GC14P051240	0.283335	https://www.genecards.org/cgi-bin/carddisp.pl?gene=TMX1
KRT23	Keratin 23	Protein Coding	Q9C075	44	GC17M040922	0.283335	https://www.genecards.org/cgi-bin/carddisp.pl?gene=KRT23
PLIN5	Perilipin 5	Protein Coding	Q00G26	44	GC19M004522	0.283335	https://www.genecards.org/cgi-bin/carddisp.pl?gene=PLIN5
RASGRF2	Ras Protein Specific Guanine Nucleotide Releasing Factor 2	Protein Coding	O14827	44	GC05P080960	0.283335	https://www.genecards.org/cgi-bin/carddisp.pl?gene=RASGRF2
SRPRB	SRP Receptor Subunit Beta	Protein Coding	Q9Y5M8	44	GC03P133784	0.283335	https://www.genecards.org/cgi-bin/carddisp.pl?gene=SRPRB
TXNDC12	Thioredoxin Domain Containing 12	Protein Coding	O95881	44	GC01M052020	0.283335	https://www.genecards.org/cgi-bin/carddisp.pl?gene=TXNDC12
ERP27	Endoplasmic Reticulum Protein 27	Protein Coding	Q96DN0	43	GC12M014914	0.283335	https://www.genecards.org/cgi-bin/carddisp.pl?gene=ERP27
PDILT	Protein Disulfide Isomerase Like, Testis Expressed	Protein Coding	Q8N807	42	GC16M026275	0.283335	https://www.genecards.org/cgi-bin/carddisp.pl?gene=PDILT
GGT2P	Gamma-Glutamyltransferase 2, Pseudogene	Pseudogene	P36268	40	GC22M079639	0.283335	https://www.genecards.org/cgi-bin/carddisp.pl?gene=GGT2P
MAIP1	Matrix AAA Peptidase Interacting Protein 1	Protein Coding	Q8WWC4	40	GC02P199956	0.283335	https://www.genecards.org/cgi-bin/carddisp.pl?gene=MAIP1
CACUL1	CDK2 Associated Cullin Domain 1	Protein Coding	Q86Y37	39	GC10M118674	0.283335	https://www.genecards.org/cgi-bin/carddisp.pl?gene=CACUL1
OFCC1	Orofacial Cleft 1 Candidate 1 (Pseudogene)	RNA Gene	Q8IZS5	38	GC06M009596	0.283335	https://www.genecards.org/cgi-bin/carddisp.pl?gene=OFCC1
IGHA1	Immunoglobulin Heavy Constant Alpha 1	Protein Coding	P01876	36	GC14M121127	0.283335	https://www.genecards.org/cgi-bin/carddisp.pl?gene=IGHA1
PVT1	Pvt1 Oncogene	RNA Gene		35	GC08P128175	0.283335	https://www.genecards.org/cgi-bin/carddisp.pl?gene=PVT1
TUG1	Taurine Up-Regulated 1	Protein Coding	A0A6I8PU40	34	GC22P030969	0.283335	https://www.genecards.org/cgi-bin/carddisp.pl?gene=TUG1
DELEC1	Deleted In Esophageal Cancer 1	RNA Gene	Q9P2X7	33	GC09P126513	0.283335	https://www.genecards.org/cgi-bin/carddisp.pl?gene=DELEC1
RMRP	RNA Component Of Mitochondrial RNA Processing Endoribonuclease	RNA Gene		33	GC09M035655	0.283335	https://www.genecards.org/cgi-bin/carddisp.pl?gene=RMRP
MIR34A	MicroRNA 34a	RNA Gene		32	GC01M015281	0.283335	https://www.genecards.org/cgi-bin/carddisp.pl?gene=MIR34A
UCA1	Urothelial Cancer Associated 1	RNA Gene		32	GC19P131723	0.283335	https://www.genecards.org/cgi-bin/carddisp.pl?gene=UCA1
MIR125A	MicroRNA 125a	RNA Gene		31	GC19P123545	0.283335	https://www.genecards.org/cgi-bin/carddisp.pl?gene=MIR125A
MIR133B	MicroRNA 133b	RNA Gene		31	GC06P052148	0.283335	https://www.genecards.org/cgi-bin/carddisp.pl?gene=MIR133B
MIR211	MicroRNA 211	RNA Gene		31	GC15M031065	0.283335	https://www.genecards.org/cgi-bin/carddisp.pl?gene=MIR211
MIR214	MicroRNA 214	RNA Gene		31	GC01M172234	0.283335	https://www.genecards.org/cgi-bin/carddisp.pl?gene=MIR214
MIR34C	MicroRNA 34c	RNA Gene		31	GC11P112585	0.283335	https://www.genecards.org/cgi-bin/carddisp.pl?gene=MIR34C
MIRLET7C	MicroRNA Let-7c	RNA Gene		31	GC21P018986	0.283335	https://www.genecards.org/cgi-bin/carddisp.pl?gene=MIRLET7C
SNHG7	Small Nucleolar RNA Host Gene 7	RNA Gene		31	GC09M138861	0.283335	https://www.genecards.org/cgi-bin/carddisp.pl?gene=SNHG7
MIR223	MicroRNA 223	RNA Gene		30	GC0XP066018	0.283335	https://www.genecards.org/cgi-bin/carddisp.pl?gene=MIR223
MIR27B	MicroRNA 27b	RNA Gene		30	GC09P102158	0.283335	https://www.genecards.org/cgi-bin/carddisp.pl?gene=MIR27B
SNHG1	Small Nucleolar RNA Host Gene 1	RNA Gene		30	GC11M128866	0.283335	https://www.genecards.org/cgi-bin/carddisp.pl?gene=SNHG1
LINC00173	Long Intergenic Non-Protein Coding RNA 173	RNA Gene	Q6ZV60	29	GC12P116533	0.283335	https://www.genecards.org/cgi-bin/carddisp.pl?gene=LINC00173
MIR148A	MicroRNA 148a	RNA Gene		29	GC07M025950	0.283335	https://www.genecards.org/cgi-bin/carddisp.pl?gene=MIR148A
MIR199B	MicroRNA 199b	RNA Gene		29	GC09M128244	0.283335	https://www.genecards.org/cgi-bin/carddisp.pl?gene=MIR199B
MIR208B	MicroRNA 208b	RNA Gene		29	GC14M023417	0.283335	https://www.genecards.org/cgi-bin/carddisp.pl?gene=MIR208B
MIR216A	MicroRNA 216a	RNA Gene		29	GC02M055988	0.283335	https://www.genecards.org/cgi-bin/carddisp.pl?gene=MIR216A
RMST	Rhabdomyosarcoma 2 Associated Transcript	RNA Gene		29	GC12P097431	0.283335	https://www.genecards.org/cgi-bin/carddisp.pl?gene=RMST
BCYRN1	Brain Cytoplasmic RNA 1	RNA Gene		28	GC02P047253	0.283335	https://www.genecards.org/cgi-bin/carddisp.pl?gene=BCYRN1
LINC01587	Long Intergenic Non-Protein Coding RNA 1587	RNA Gene	Q99440	28	GC04P005524	0.283335	https://www.genecards.org/cgi-bin/carddisp.pl?gene=LINC01587
MIR369	MicroRNA 369	RNA Gene		28	GC14P117904	0.283335	https://www.genecards.org/cgi-bin/carddisp.pl?gene=MIR369
MIR381	MicroRNA 381	RNA Gene		28	GC14P117912	0.283335	https://www.genecards.org/cgi-bin/carddisp.pl?gene=MIR381
MIR539	MicroRNA 539	RNA Gene		28	GC14P117927	0.283335	https://www.genecards.org/cgi-bin/carddisp.pl?gene=MIR539
MIR708	MicroRNA 708	RNA Gene		28	GC11M079402	0.283335	https://www.genecards.org/cgi-bin/carddisp.pl?gene=MIR708
CLRN1-AS1	CLRN1 Antisense RNA 1	RNA Gene		26	GC03P150852	0.283335	https://www.genecards.org/cgi-bin/carddisp.pl?gene=CLRN1-AS1
MIR494	MicroRNA 494	RNA Gene		26	GC14P117924	0.283335	https://www.genecards.org/cgi-bin/carddisp.pl?gene=MIR494
COL18A1-AS1	COL18A1 Antisense RNA 1	RNA Gene		24	GC21M045419	0.283335	https://www.genecards.org/cgi-bin/carddisp.pl?gene=COL18A1-AS1
MIR545	MicroRNA 545	RNA Gene		24	GC0XM074287	0.283335	https://www.genecards.org/cgi-bin/carddisp.pl?gene=MIR545
MIR570	MicroRNA 570	RNA Gene		24	GC03P199255	0.283335	https://www.genecards.org/cgi-bin/carddisp.pl?gene=MIR570
MIR660	MicroRNA 660	RNA Gene		24	GC0XP050013	0.283335	https://www.genecards.org/cgi-bin/carddisp.pl?gene=MIR660
ZNF503-AS2	ZNF503 Antisense RNA 2	RNA Gene	A6NEH8	24	GC10P075401	0.283335	https://www.genecards.org/cgi-bin/carddisp.pl?gene=ZNF503-AS2
APOC4-APOC2	APOC4-APOC2 Readthrough (NMD Candidate)	RNA Gene		22	GC19P044942	0.283335	https://www.genecards.org/cgi-bin/carddisp.pl?gene=APOC4-APOC2
MIR3120	MicroRNA 3120	RNA Gene		22	GC01P172138	0.283335	https://www.genecards.org/cgi-bin/carddisp.pl?gene=MIR3120
MIR487A	MicroRNA 487a	RNA Gene		22	GC14P117920	0.283335	https://www.genecards.org/cgi-bin/carddisp.pl?gene=MIR487A
MSC-AS1	MSC Antisense RNA 1	RNA Gene		22	GC08P071828	0.283335	https://www.genecards.org/cgi-bin/carddisp.pl?gene=MSC-AS1
ROCR	Regulator Of Chondrogenesis RNA	RNA Gene		22	GC17M087858	0.283335	https://www.genecards.org/cgi-bin/carddisp.pl?gene=ROCR
FAM225A	Family With Sequence Similarity 225 Member A	RNA Gene		21	GC09P126487	0.283335	https://www.genecards.org/cgi-bin/carddisp.pl?gene=FAM225A
FAS-AS1	FAS Antisense RNA 1	RNA Gene		21	GC10M088991	0.283335	https://www.genecards.org/cgi-bin/carddisp.pl?gene=FAS-AS1
SNORD44	Small Nucleolar RNA, C/D Box 44	RNA Gene		21	GC01M174982	0.283335	https://www.genecards.org/cgi-bin/carddisp.pl?gene=SNORD44
LINC00685	Long Intergenic Non-Protein Coding RNA 685	RNA Gene		20	GC0XP000319	0.283335	https://www.genecards.org/cgi-bin/carddisp.pl?gene=LINC00685
VTRNA1-1	Vault RNA 1-1	RNA Gene		20	GC05P155316	0.283335	https://www.genecards.org/cgi-bin/carddisp.pl?gene=VTRNA1-1
FAM225B	Family With Sequence Similarity 225 Member B	RNA Gene		18	GC09M113103	0.283335	https://www.genecards.org/cgi-bin/carddisp.pl?gene=FAM225B
MIR222HG	MiR222/221 Cluster Host Gene	RNA Gene		18	GC0XM045745	0.283335	https://www.genecards.org/cgi-bin/carddisp.pl?gene=MIR222HG
MIR943	MicroRNA 943	RNA Gene		18	GC04M005288	0.283335	https://www.genecards.org/cgi-bin/carddisp.pl?gene=MIR943
EIF3J-DT	EIF3J Divergent Transcript	RNA Gene		17	GC15M044949	0.283335	https://www.genecards.org/cgi-bin/carddisp.pl?gene=EIF3J-DT
LINC00051	Long Intergenic Non-Protein Coding RNA 51	RNA Gene		17	GC08P142198	0.283335	https://www.genecards.org/cgi-bin/carddisp.pl?gene=LINC00051
MIR522	MicroRNA 522	RNA Gene		16	GC19P053751	0.283335	https://www.genecards.org/cgi-bin/carddisp.pl?gene=MIR522
MIR520F	MicroRNA 520f	RNA Gene		15	GC19P053682	0.283335	https://www.genecards.org/cgi-bin/carddisp.pl?gene=MIR520F
FAM224B	Family With Sequence Similarity 224 Member B	RNA Gene		14	GC0YM017552	0.283335	https://www.genecards.org/cgi-bin/carddisp.pl?gene=FAM224B
TRC-GCA24-1	TRNA-Cys (GCA) 24-1	RNA Gene		14	GC17M085080	0.283335	https://www.genecards.org/cgi-bin/carddisp.pl?gene=TRC-GCA24-1
CDR1-AS	CDR1 Antisense RNA	RNA Gene		13	GC0XU902169	0.283335	https://www.genecards.org/cgi-bin/carddisp.pl?gene=CDR1-AS
MSBP1	Minisatellite Binding Protein 1	Protein Coding		10	GC00U990213	0.283335	https://www.genecards.org/cgi-bin/carddisp.pl?gene=MSBP1
LOC110806262	Solute Carrier Family 6 Member 4 Gene Promoter	Functional Element		8	GC17P030235	0.283335	https://www.genecards.org/cgi-bin/carddisp.pl?gene=LOC110806262
MIR122	MicroRNA 122	RNA Gene		30	GC18P058451	17.0698	https://www.genecards.org/cgi-bin/carddisp.pl?gene=MIR122
MIR34A	MicroRNA 34a	RNA Gene		32	GC01M015281	17.0246	https://www.genecards.org/cgi-bin/carddisp.pl?gene=MIR34A
LIVAR	Liver Cell Viability Associated LncRNA	RNA Gene		17	GC18M070336	16.6842	https://www.genecards.org/cgi-bin/carddisp.pl?gene=LIVAR
MIR21	MicroRNA 21	RNA Gene		33	GC17P123488	16.5126	https://www.genecards.org/cgi-bin/carddisp.pl?gene=MIR21
MSR1	Macrophage Scavenger Receptor 1	Protein Coding	P21757	58	GC08M016107	15.5494	https://www.genecards.org/cgi-bin/carddisp.pl?gene=MSR1
MIR17	MicroRNA 17	RNA Gene		28	GC13P091350	14.6384	https://www.genecards.org/cgi-bin/carddisp.pl?gene=MIR17
MIR132	MicroRNA 132	RNA Gene		31	GC17M002049	14.5171	https://www.genecards.org/cgi-bin/carddisp.pl?gene=MIR132
MIR378A	MicroRNA 378a	RNA Gene		31	GC05P149732	14.5171	https://www.genecards.org/cgi-bin/carddisp.pl?gene=MIR378A
MIR107	MicroRNA 107	RNA Gene		29	GC10M089604	14.5171	https://www.genecards.org/cgi-bin/carddisp.pl?gene=MIR107
MIR33A	MicroRNA 33a	RNA Gene		28	GC22P041900	14.5171	https://www.genecards.org/cgi-bin/carddisp.pl?gene=MIR33A
MIR29C	MicroRNA 29c	RNA Gene		27	GC01M207835	14.5171	https://www.genecards.org/cgi-bin/carddisp.pl?gene=MIR29C
MIR140	MicroRNA 140	RNA Gene		33	GC16P097800	14.2242	https://www.genecards.org/cgi-bin/carddisp.pl?gene=MIR140
MIR27A	MicroRNA 27a	RNA Gene		32	GC19M096311	14.2242	https://www.genecards.org/cgi-bin/carddisp.pl?gene=MIR27A
MIR10B	MicroRNA 10b	RNA Gene		31	GC02P176150	14.2242	https://www.genecards.org/cgi-bin/carddisp.pl?gene=MIR10B
MIR126	MicroRNA 126	RNA Gene		31	GC09P136670	14.2242	https://www.genecards.org/cgi-bin/carddisp.pl?gene=MIR126
MIR130A	MicroRNA 130a	RNA Gene		31	GC11P057641	14.2242	https://www.genecards.org/cgi-bin/carddisp.pl?gene=MIR130A
MIR200C	MicroRNA 200c	RNA Gene		31	GC12P042128	14.2242	https://www.genecards.org/cgi-bin/carddisp.pl?gene=MIR200C
MIR22	MicroRNA 22	RNA Gene		31	GC17M001713	14.2242	https://www.genecards.org/cgi-bin/carddisp.pl?gene=MIR22
MIR200B	MicroRNA 200b	RNA Gene		30	GC01P001167	14.2242	https://www.genecards.org/cgi-bin/carddisp.pl?gene=MIR200B
MIR26A1	MicroRNA 26a-1	RNA Gene		30	GC03P037969	14.2242	https://www.genecards.org/cgi-bin/carddisp.pl?gene=MIR26A1
MIR27B	MicroRNA 27b	RNA Gene		30	GC09P102158	14.2242	https://www.genecards.org/cgi-bin/carddisp.pl?gene=MIR27B
MIR429	MicroRNA 429	RNA Gene		30	GC01P050634	14.2242	https://www.genecards.org/cgi-bin/carddisp.pl?gene=MIR429
MIR154	MicroRNA 154	RNA Gene		29	GC14P117895	14.2242	https://www.genecards.org/cgi-bin/carddisp.pl?gene=MIR154
MIR16-1	MicroRNA 16-1	RNA Gene		29	GC13M050048	14.2242	https://www.genecards.org/cgi-bin/carddisp.pl?gene=MIR16-1
MIR200A	MicroRNA 200a	RNA Gene		29	GC01P050633	14.2242	https://www.genecards.org/cgi-bin/carddisp.pl?gene=MIR200A
MIR203A	MicroRNA 203a	RNA Gene		29	GC14P116969	14.2242	https://www.genecards.org/cgi-bin/carddisp.pl?gene=MIR203A
MIR31	MicroRNA 31	RNA Gene		29	GC09M022191	14.2242	https://www.genecards.org/cgi-bin/carddisp.pl?gene=MIR31
MIR151A	MicroRNA 151a	RNA Gene		28	GC08M140954	14.2242	https://www.genecards.org/cgi-bin/carddisp.pl?gene=MIR151A
MIR187	MicroRNA 187	RNA Gene		28	GC18M035904	14.2242	https://www.genecards.org/cgi-bin/carddisp.pl?gene=MIR187
MIR30A	MicroRNA 30a	RNA Gene		28	GC06M071403	14.2242	https://www.genecards.org/cgi-bin/carddisp.pl?gene=MIR30A
MIR183	MicroRNA 183	RNA Gene		27	GC07M129887	14.2242	https://www.genecards.org/cgi-bin/carddisp.pl?gene=MIR183
MIR30D	MicroRNA 30d	RNA Gene		27	GC08M134804	14.2242	https://www.genecards.org/cgi-bin/carddisp.pl?gene=MIR30D
MIR95	MicroRNA 95	RNA Gene		27	GC04M008018	14.2242	https://www.genecards.org/cgi-bin/carddisp.pl?gene=MIR95
MIR451A	MicroRNA 451a	RNA Gene		26	GC17M028861	14.2242	https://www.genecards.org/cgi-bin/carddisp.pl?gene=MIR451A
LNCARSR	LncRNA Regulator Of Akt Signaling Associated With HCC And RCC	RNA Gene		20	GC09M079507	14.2242	https://www.genecards.org/cgi-bin/carddisp.pl?gene=LNCARSR
ADIPOQ	Adiponectin, C1Q And Collagen Domain Containing	Protein Coding	Q15848	59	GC03P186842	9.72251	https://www.genecards.org/cgi-bin/carddisp.pl?gene=ADIPOQ
INS	Insulin	Protein Coding	P01308	60	GC11M002159	8.86952	https://www.genecards.org/cgi-bin/carddisp.pl?gene=INS
GPT	Glutamic--Pyruvic Transaminase	Protein Coding	P24298	55	GC08P144502	6.9167	https://www.genecards.org/cgi-bin/carddisp.pl?gene=GPT
MIR7-3HG	MIR7-3 Host Gene	RNA Gene	Q8N6C7	35	GC19P122009	6.85692	https://www.genecards.org/cgi-bin/carddisp.pl?gene=MIR7-3HG
TNF	Tumor Necrosis Factor	Protein Coding	P01375	65	GC06P144764	6.67999	https://www.genecards.org/cgi-bin/carddisp.pl?gene=TNF
SLC17A5	Solute Carrier Family 17 Member 5	Protein Coding	Q9NRA2	58	GC06M073593	6.44863	https://www.genecards.org/cgi-bin/carddisp.pl?gene=SLC17A5
MT-TP	Mitochondrially Encoded TRNA-Pro (CCN)	RNA Gene		17	GCMTM015957	6.02622	https://www.genecards.org/cgi-bin/carddisp.pl?gene=MT-TP
SOD2-OT1	SOD2 Overlapping Transcript 1	RNA Gene		21	GC06M159772	5.44031	https://www.genecards.org/cgi-bin/carddisp.pl?gene=SOD2-OT1
FAS-AS1	FAS Antisense RNA 1	RNA Gene		21	GC10M088991	5.25251	https://www.genecards.org/cgi-bin/carddisp.pl?gene=FAS-AS1
PNPLA3	Patatin Like Phospholipase Domain Containing 3	Protein Coding	Q9NST1	55	GC22P043923	5.08888	https://www.genecards.org/cgi-bin/carddisp.pl?gene=PNPLA3
LINC01672	Long Intergenic Non-Protein Coding RNA 1672	RNA Gene		21	GC01P050860	4.91104	https://www.genecards.org/cgi-bin/carddisp.pl?gene=LINC01672
BCL2	BCL2 Apoptosis Regulator	Protein Coding	P10415	64	GC18M063123	4.45984	https://www.genecards.org/cgi-bin/carddisp.pl?gene=BCL2
PTX3	Pentraxin 3	Protein Coding	P26022	56	GC03P157436	4.40057	https://www.genecards.org/cgi-bin/carddisp.pl?gene=PTX3
PPARA	Peroxisome Proliferator Activated Receptor Alpha	Protein Coding	Q07869	58	GC22P046150	4.22466	https://www.genecards.org/cgi-bin/carddisp.pl?gene=PPARA
CYP2E1	Cytochrome P450 Family 2 Subfamily E Member 1	Protein Coding	P05181	59	GC10P133520	4.16716	https://www.genecards.org/cgi-bin/carddisp.pl?gene=CYP2E1
CERNA3	Competing Endogenous LncRNA 3 For MiR-645	RNA Gene		21	GC08P056352	4.1249	https://www.genecards.org/cgi-bin/carddisp.pl?gene=CERNA3
MASP1	MBL Associated Serine Protease 1	Protein Coding	P48740	61	GC03M187216	4.10764	https://www.genecards.org/cgi-bin/carddisp.pl?gene=MASP1
MASP2	MBL Associated Serine Protease 2	Protein Coding	O00187	59	GC01M015332	4.10764	https://www.genecards.org/cgi-bin/carddisp.pl?gene=MASP2
MAT2A	Methionine Adenosyltransferase 2A	Protein Coding	P31153	59	GC02P086687	4.10764	https://www.genecards.org/cgi-bin/carddisp.pl?gene=MAT2A
SERPING1	Serpin Family G Member 1	Protein Coding	P05155	59	GC11P057597	4.10764	https://www.genecards.org/cgi-bin/carddisp.pl?gene=SERPING1
THBD	Thrombomodulin	Protein Coding	P07204	59	GC20M023026	4.10764	https://www.genecards.org/cgi-bin/carddisp.pl?gene=THBD
VTN	Vitronectin	Protein Coding	P04004	57	GC17M084696	4.10764	https://www.genecards.org/cgi-bin/carddisp.pl?gene=VTN
PIGA	Phosphatidylinositol Glycan Anchor Biosynthesis Class A	Protein Coding	P37287	56	GC0XM015319	4.10764	https://www.genecards.org/cgi-bin/carddisp.pl?gene=PIGA
PRMT7	Protein Arginine Methyltransferase 7	Protein Coding	Q9NVM4	56	GC16P097697	4.10764	https://www.genecards.org/cgi-bin/carddisp.pl?gene=PRMT7
YARS1	Tyrosyl-TRNA Synthetase 1	Protein Coding	P54577	56	GC01M032776	4.10764	https://www.genecards.org/cgi-bin/carddisp.pl?gene=YARS1
OFD1	OFD1 Centriole And Centriolar Satellite Protein	Protein Coding	O75665	55	GC0XP013714	4.10764	https://www.genecards.org/cgi-bin/carddisp.pl?gene=OFD1
SPAG1	Sperm Associated Antigen 1	Protein Coding	Q07617	52	GC08P100157	4.10764	https://www.genecards.org/cgi-bin/carddisp.pl?gene=SPAG1
HYDIN	HYDIN Axonemal Central Pair Apparatus Protein	Protein Coding	Q4G0P3	51	GC16M073559	4.10764	https://www.genecards.org/cgi-bin/carddisp.pl?gene=HYDIN
NME8	NME/NM23 Family Member 8	Protein Coding	Q8N427	51	GC07P037889	4.10764	https://www.genecards.org/cgi-bin/carddisp.pl?gene=NME8
RSPH1	Radial Spoke Head Component 1	Protein Coding	Q8WYR4	50	GC21M042472	4.10764	https://www.genecards.org/cgi-bin/carddisp.pl?gene=RSPH1
VSIG4	V-Set And Immunoglobulin Domain Containing 4	Protein Coding	Q9Y279	50	GC0XM066021	4.10764	https://www.genecards.org/cgi-bin/carddisp.pl?gene=VSIG4
ZMYND10	Zinc Finger MYND-Type Containing 10	Protein Coding	O75800	50	GC03M054101	4.10764	https://www.genecards.org/cgi-bin/carddisp.pl?gene=ZMYND10
RSPH4A	Radial Spoke Head Component 4A	Protein Coding	Q5TD94	49	GC06P116616	4.10764	https://www.genecards.org/cgi-bin/carddisp.pl?gene=RSPH4A
DNAAF11	Dynein Axonemal Assembly Factor 11	Protein Coding	Q86X45	48	GC08M136367	4.10764	https://www.genecards.org/cgi-bin/carddisp.pl?gene=DNAAF11
RSPH9	Radial Spoke Head Component 9	Protein Coding	Q9H1X1	48	GC06P144972	4.10764	https://www.genecards.org/cgi-bin/carddisp.pl?gene=RSPH9
MALAT1	Metastasis Associated Lung Adenocarcinoma Transcript 1	RNA Gene		33	GC11P094626	4.10764	https://www.genecards.org/cgi-bin/carddisp.pl?gene=MALAT1
ADIPOQ-AS1	ADIPOQ Antisense RNA 1	RNA Gene		20	GC03M186851	4.10764	https://www.genecards.org/cgi-bin/carddisp.pl?gene=ADIPOQ-AS1
LOC126805688	BRD4-Independent Group 4 Enhancer GRCh37_chr1:33251929-33253128	Functional Element		6	GC01P032786	4.10764	https://www.genecards.org/cgi-bin/carddisp.pl?gene=LOC126805688
LOC106660625	Adiponectin Enhancer Region	Functional Element		5	GC03P187736	4.10764	https://www.genecards.org/cgi-bin/carddisp.pl?gene=LOC106660625
PGR-AS1	PGR Antisense RNA 1	RNA Gene		20	GC11P101131	4.05932	https://www.genecards.org/cgi-bin/carddisp.pl?gene=PGR-AS1
MTTP	Microsomal Triglyceride Transfer Protein	Protein Coding	P55157	57	GC04P099563	3.93482	https://www.genecards.org/cgi-bin/carddisp.pl?gene=MTTP
IL6	Interleukin 6	Protein Coding	P05231	64	GC07P022725	3.68081	https://www.genecards.org/cgi-bin/carddisp.pl?gene=IL6
ACER3	Alkaline Ceramidase 3	Protein Coding	Q9NUN7	50	GC11P076860	3.5656	https://www.genecards.org/cgi-bin/carddisp.pl?gene=ACER3
PPARG	Peroxisome Proliferator Activated Receptor Gamma	Protein Coding	P37231	66	GC03P012287	3.42546	https://www.genecards.org/cgi-bin/carddisp.pl?gene=PPARG
LEPR	Leptin Receptor	Protein Coding	P48357	63	GC01P065444	3.28375	https://www.genecards.org/cgi-bin/carddisp.pl?gene=LEPR
HSD17B13	Hydroxysteroid 17-Beta Dehydrogenase 13	Protein Coding	Q7Z5P4	51	GC04M087303	3.28375	https://www.genecards.org/cgi-bin/carddisp.pl?gene=HSD17B13
MYC	MYC Proto-Oncogene, BHLH Transcription Factor	Protein Coding	P01106	66	GC08P127735	3.25596	https://www.genecards.org/cgi-bin/carddisp.pl?gene=MYC
KRT18	Keratin 18	Protein Coding	P05783	63	GC12P052948	3.22167	https://www.genecards.org/cgi-bin/carddisp.pl?gene=KRT18
PON1	Paraoxonase 1	Protein Coding	P27169	60	GC07M095297	3.17414	https://www.genecards.org/cgi-bin/carddisp.pl?gene=PON1
TGM2	Transglutaminase 2	Protein Coding	P21980	60	GC20M038127	3.12388	https://www.genecards.org/cgi-bin/carddisp.pl?gene=TGM2
GGT1	Gamma-Glutamyltransferase 1	Protein Coding	P19440	62	GC22P024583	3.07037	https://www.genecards.org/cgi-bin/carddisp.pl?gene=GGT1
HFE	Homeostatic Iron Regulator	Protein Coding	Q30201	58	GC06P026087	3.07037	https://www.genecards.org/cgi-bin/carddisp.pl?gene=HFE
SOD2	Superoxide Dismutase 2	Protein Coding	P04179	60	GC06M159669	2.95036	https://www.genecards.org/cgi-bin/carddisp.pl?gene=SOD2
CXCL8	C-X-C Motif Chemokine Ligand 8	Protein Coding	P10145	56	GC04P073740	2.89377	https://www.genecards.org/cgi-bin/carddisp.pl?gene=CXCL8
PTPRC	Protein Tyrosine Phosphatase Receptor Type C	Protein Coding	P08575	65	GC01P198607	2.8417	https://www.genecards.org/cgi-bin/carddisp.pl?gene=PTPRC
ALK	ALK Receptor Tyrosine Kinase	Protein Coding	Q9UM73	64	GC02M029190	2.8417	https://www.genecards.org/cgi-bin/carddisp.pl?gene=ALK
CD19	CD19 Molecule	Protein Coding	P15391	64	GC16P096580	2.8417	https://www.genecards.org/cgi-bin/carddisp.pl?gene=CD19
CD4	CD4 Molecule	Protein Coding	P01730	63	GC12P006786	2.8417	https://www.genecards.org/cgi-bin/carddisp.pl?gene=CD4
MME	Membrane Metalloendopeptidase	Protein Coding	P08473	63	GC03P155024	2.8417	https://www.genecards.org/cgi-bin/carddisp.pl?gene=MME
NCAM1	Neural Cell Adhesion Molecule 1	Protein Coding	P13591	61	GC11P112961	2.8417	https://www.genecards.org/cgi-bin/carddisp.pl?gene=NCAM1
CD79A	CD79a Molecule	Protein Coding	P11912	60	GC19P041877	2.8417	https://www.genecards.org/cgi-bin/carddisp.pl?gene=CD79A
BCL6	BCL6 Transcription Repressor	Protein Coding	P41182	59	GC03M187721	2.8417	https://www.genecards.org/cgi-bin/carddisp.pl?gene=BCL6
CD38	CD38 Molecule	Protein Coding	P28907	59	GC04P025740	2.8417	https://www.genecards.org/cgi-bin/carddisp.pl?gene=CD38
PAX5	Paired Box 5	Protein Coding	Q02548	59	GC09M037064	2.8417	https://www.genecards.org/cgi-bin/carddisp.pl?gene=PAX5
IRF4	Interferon Regulatory Factor 4	Protein Coding	Q15306	58	GC06P000391	2.8417	https://www.genecards.org/cgi-bin/carddisp.pl?gene=IRF4
PRDM1	PR/SET Domain 1	Protein Coding	O75626	58	GC06P145634	2.8417	https://www.genecards.org/cgi-bin/carddisp.pl?gene=PRDM1
SDC1	Syndecan 1	Protein Coding	P18827	56	GC02M020200	2.8417	https://www.genecards.org/cgi-bin/carddisp.pl?gene=SDC1
TNFRSF8	TNF Receptor Superfamily Member 8	Protein Coding	P28908	56	GC01P012063	2.8417	https://www.genecards.org/cgi-bin/carddisp.pl?gene=TNFRSF8
CD5	CD5 Molecule	Protein Coding	P06127	55	GC11P093434	2.8417	https://www.genecards.org/cgi-bin/carddisp.pl?gene=CD5
PDLIM7	PDZ And LIM Domain 7	Protein Coding	Q9NR12	54	GC05M177483	2.8417	https://www.genecards.org/cgi-bin/carddisp.pl?gene=PDLIM7
POU2AF1	POU Class 2 Homeobox Associating Factor 1	Protein Coding	Q16633	49	GC11M111352	2.8417	https://www.genecards.org/cgi-bin/carddisp.pl?gene=POU2AF1
LOC102723407	Immunoglobulin Heavy Variable 4-38-2-Like	Protein Coding		17	GC14P8B0041	2.8417	https://www.genecards.org/cgi-bin/carddisp.pl?gene=LOC102723407
LGALS3	Galectin 3	Protein Coding	P17931	58	GC14P055124	2.80272	https://www.genecards.org/cgi-bin/carddisp.pl?gene=LGALS3
ALB	Albumin	Protein Coding	P02768	62	GC04P073397	2.77244	https://www.genecards.org/cgi-bin/carddisp.pl?gene=ALB
PTEN	Phosphatase And Tensin Homolog	Protein Coding	P60484	65	GC10P112611	2.70961	https://www.genecards.org/cgi-bin/carddisp.pl?gene=PTEN
TF	Transferrin	Protein Coding	P02787	64	GC03P140082	2.70961	https://www.genecards.org/cgi-bin/carddisp.pl?gene=TF
NR1H4	Nuclear Receptor Subfamily 1 Group H Member 4	Protein Coding	Q96RI1	61	GC12P100473	2.59167	https://www.genecards.org/cgi-bin/carddisp.pl?gene=NR1H4
RARRES2	Retinoic Acid Receptor Responder 2	Protein Coding	Q99969	52	GC07M150333	2.52915	https://www.genecards.org/cgi-bin/carddisp.pl?gene=RARRES2
LINC-ROR	Long Intergenic Non-Protein Coding RNA, Regulator Of Reprogramming	RNA Gene		26	GC18M057054	2.52915	https://www.genecards.org/cgi-bin/carddisp.pl?gene=LINC-ROR
ICAM1	Intercellular Adhesion Molecule 1	Protein Coding	P05362	63	GC19P122290	2.47951	https://www.genecards.org/cgi-bin/carddisp.pl?gene=ICAM1
MMP9	Matrix Metallopeptidase 9	Protein Coding	P14780	66	GC20P046008	2.46	https://www.genecards.org/cgi-bin/carddisp.pl?gene=MMP9
HGF	Hepatocyte Growth Factor	Protein Coding	P14210	65	GC07M081699	2.46	https://www.genecards.org/cgi-bin/carddisp.pl?gene=HGF
APOE	Apolipoprotein E	Protein Coding	P02649	63	GC19P123244	2.46	https://www.genecards.org/cgi-bin/carddisp.pl?gene=APOE
CCL2	C-C Motif Chemokine Ligand 2	Protein Coding	P13500	62	GC17P034255	2.38151	https://www.genecards.org/cgi-bin/carddisp.pl?gene=CCL2
PEMT	Phosphatidylethanolamine N-Methyltransferase	Protein Coding	Q9UBM1	51	GC17M084430	2.38151	https://www.genecards.org/cgi-bin/carddisp.pl?gene=PEMT
LINC02605	Long Intergenic Non-Protein Coding RNA 2605	RNA Gene		22	GC08P078838	2.38151	https://www.genecards.org/cgi-bin/carddisp.pl?gene=LINC02605
H19	H19 Imprinted Maternally Expressed Transcript	RNA Gene		36	GC11M001995	2.29676	https://www.genecards.org/cgi-bin/carddisp.pl?gene=H19
CD36	CD36 Molecule (CD36 Blood Group)	Protein Coding	P16671	63	GC07P080369	2.28841	https://www.genecards.org/cgi-bin/carddisp.pl?gene=CD36
GSTP1	Glutathione S-Transferase Pi 1	Protein Coding	P09211	63	GC11P067583	2.28841	https://www.genecards.org/cgi-bin/carddisp.pl?gene=GSTP1
SLC25A13	Solute Carrier Family 25 Member 13	Protein Coding	Q9UJS0	58	GC07M096120	2.28841	https://www.genecards.org/cgi-bin/carddisp.pl?gene=SLC25A13
SNTA1	Syntrophin Alpha 1	Protein Coding	Q13424	58	GC20M033407	2.28841	https://www.genecards.org/cgi-bin/carddisp.pl?gene=SNTA1
RUNX3	RUNX Family Transcription Factor 3	Protein Coding	Q13761	56	GC01M024899	2.28841	https://www.genecards.org/cgi-bin/carddisp.pl?gene=RUNX3
AREG	Amphiregulin	Protein Coding	P15514	55	GC04P074445	2.28841	https://www.genecards.org/cgi-bin/carddisp.pl?gene=AREG
HCCAT5	Hepatocellular Carcinoma Associated Transcript 5	RNA Gene		25	GC16P073092	2.28841	https://www.genecards.org/cgi-bin/carddisp.pl?gene=HCCAT5
GHRL	Ghrelin And Obestatin Prepropeptide	Protein Coding	Q9UBU3	55	GC03M010285	2.25155	https://www.genecards.org/cgi-bin/carddisp.pl?gene=GHRL
TGFB1	Transforming Growth Factor Beta 1	Protein Coding	P01137	66	GC19M041301	2.20401	https://www.genecards.org/cgi-bin/carddisp.pl?gene=TGFB1
SQSTM1	Sequestosome 1	Protein Coding	Q13501	62	GC05P179806	2.20401	https://www.genecards.org/cgi-bin/carddisp.pl?gene=SQSTM1
IL1RN	Interleukin 1 Receptor Antagonist	Protein Coding	P18510	63	GC02P146140	2.16707	https://www.genecards.org/cgi-bin/carddisp.pl?gene=IL1RN
BMP8B	Bone Morphogenetic Protein 8b	Protein Coding	P34820	50	GC01M039757	2.16707	https://www.genecards.org/cgi-bin/carddisp.pl?gene=BMP8B
TMX2-CTNND1	TMX2-CTNND1 Readthrough (NMD Candidate)	RNA Gene		25	GC11P057712	2.04275	https://www.genecards.org/cgi-bin/carddisp.pl?gene=TMX2-CTNND1
FGF21	Fibroblast Growth Factor 21	Protein Coding	Q9NSA1	51	GC19P123383	1.98023	https://www.genecards.org/cgi-bin/carddisp.pl?gene=FGF21
MEG3	Maternally Expressed 3	RNA Gene		37	GC14P117888	1.98023	https://www.genecards.org/cgi-bin/carddisp.pl?gene=MEG3
MIR192	MicroRNA 192	RNA Gene		31	GC11M064891	1.98023	https://www.genecards.org/cgi-bin/carddisp.pl?gene=MIR192
TM6SF2	Transmembrane 6 Superfamily Member 2	Protein Coding	Q9BZW4	43	GC19M019264	1.95853	https://www.genecards.org/cgi-bin/carddisp.pl?gene=TM6SF2
TP53	Tumor Protein P53	Protein Coding	P04637	66	GC17M007661	1.91108	https://www.genecards.org/cgi-bin/carddisp.pl?gene=TP53
EIF2AK2	Eukaryotic Translation Initiation Factor 2 Alpha Kinase 2	Protein Coding	P19525	63	GC02M037099	1.91108	https://www.genecards.org/cgi-bin/carddisp.pl?gene=EIF2AK2
HNF4A	Hepatocyte Nuclear Factor 4 Alpha	Protein Coding	P41235	63	GC20P044355	1.91108	https://www.genecards.org/cgi-bin/carddisp.pl?gene=HNF4A
SIRT1	Sirtuin 1	Protein Coding	Q96EB6	62	GC10P067884	1.91108	https://www.genecards.org/cgi-bin/carddisp.pl?gene=SIRT1
IGF1	Insulin Like Growth Factor 1	Protein Coding	P05019	61	GC12M102395	1.91108	https://www.genecards.org/cgi-bin/carddisp.pl?gene=IGF1
LCN2	Lipocalin 2	Protein Coding	P80188	58	GC09P128149	1.91108	https://www.genecards.org/cgi-bin/carddisp.pl?gene=LCN2
PLIN2	Perilipin 2	Protein Coding	Q99541	55	GC09M019278	1.91108	https://www.genecards.org/cgi-bin/carddisp.pl?gene=PLIN2
RPS27A	Ribosomal Protein S27a	Protein Coding	P62979	55	GC02P055231	1.91108	https://www.genecards.org/cgi-bin/carddisp.pl?gene=RPS27A
SMURF1	SMAD Specific E3 Ubiquitin Protein Ligase 1	Protein Coding	Q9HCE7	55	GC07M099027	1.91108	https://www.genecards.org/cgi-bin/carddisp.pl?gene=SMURF1
TMBIM1	Transmembrane BAX Inhibitor Motif Containing 1	Protein Coding	Q969X1	41	GC02M218274	1.91108	https://www.genecards.org/cgi-bin/carddisp.pl?gene=TMBIM1
CHKB-CPT1B	CHKB-CPT1B Readthrough (NMD Candidate)	RNA Gene		26	GC22M050568	1.91108	https://www.genecards.org/cgi-bin/carddisp.pl?gene=CHKB-CPT1B
ENPP1	Ectonucleotide Pyrophosphatase/Phosphodiesterase 1	Protein Coding	P22413	63	GC06P131808	1.87414	https://www.genecards.org/cgi-bin/carddisp.pl?gene=ENPP1
INSR	Insulin Receptor	Protein Coding	P06213	67	GC19M007112	1.83259	https://www.genecards.org/cgi-bin/carddisp.pl?gene=INSR
SMAD3	SMAD Family Member 3	Protein Coding	P84022	66	GC15P067063	1.83259	https://www.genecards.org/cgi-bin/carddisp.pl?gene=SMAD3
IFNG	Interferon Gamma	Protein Coding	P01579	63	GC12M068154	1.83259	https://www.genecards.org/cgi-bin/carddisp.pl?gene=IFNG
IFNAR1	Interferon Alpha And Beta Receptor Subunit 1	Protein Coding	P17181	62	GC21P033324	1.83259	https://www.genecards.org/cgi-bin/carddisp.pl?gene=IFNAR1
MAPK8	Mitogen-Activated Protein Kinase 8	Protein Coding	P45983	62	GC10P048306	1.83259	https://www.genecards.org/cgi-bin/carddisp.pl?gene=MAPK8
IRF1	Interferon Regulatory Factor 1	Protein Coding	P10914	60	GC05M132440	1.83259	https://www.genecards.org/cgi-bin/carddisp.pl?gene=IRF1
CXCL10	C-X-C Motif Chemokine Ligand 10	Protein Coding	P02778	57	GC04M076021	1.83259	https://www.genecards.org/cgi-bin/carddisp.pl?gene=CXCL10
RIPK3	Receptor Interacting Serine/Threonine Kinase 3	Protein Coding	Q9Y572	56	GC14M024336	1.83259	https://www.genecards.org/cgi-bin/carddisp.pl?gene=RIPK3
CCR9	C-C Motif Chemokine Receptor 9	Protein Coding	P51686	52	GC03P059706	1.83259	https://www.genecards.org/cgi-bin/carddisp.pl?gene=CCR9
GSDMD	Gasdermin D	Protein Coding	P57764	51	GC08P143553	1.83259	https://www.genecards.org/cgi-bin/carddisp.pl?gene=GSDMD
IFNA1	Interferon Alpha 1	Protein Coding	P01562	51	GC09P021798	1.83259	https://www.genecards.org/cgi-bin/carddisp.pl?gene=IFNA1
TRE-TTC3-1	TRNA-Glu (Anticodon TTC) 3-1	RNA Gene		18	GC01P051673	1.83259	https://www.genecards.org/cgi-bin/carddisp.pl?gene=TRE-TTC3-1
TRC-GCA24-1	TRNA-Cys (GCA) 24-1	RNA Gene		14	GC17M085080	1.83259	https://www.genecards.org/cgi-bin/carddisp.pl?gene=TRC-GCA24-1
GCKR	Glucokinase Regulator	Protein Coding	Q14397	53	GC02P027496	1.74409	https://www.genecards.org/cgi-bin/carddisp.pl?gene=GCKR
MIR552	MicroRNA 552	RNA Gene		24	GC01M034669	1.74409	https://www.genecards.org/cgi-bin/carddisp.pl?gene=MIR552
CAT	Catalase	Protein Coding	P04040	64	GC11P034460	1.73948	https://www.genecards.org/cgi-bin/carddisp.pl?gene=CAT
TNFRSF1A	TNF Receptor Superfamily Member 1A	Protein Coding	P19438	63	GC12M006328	1.73948	https://www.genecards.org/cgi-bin/carddisp.pl?gene=TNFRSF1A
CD44	CD44 Molecule (IN Blood Group)	Protein Coding	P16070	62	GC11P035139	1.73948	https://www.genecards.org/cgi-bin/carddisp.pl?gene=CD44
HIF1A	Hypoxia Inducible Factor 1 Subunit Alpha	Protein Coding	Q16665	62	GC14P061695	1.73948	https://www.genecards.org/cgi-bin/carddisp.pl?gene=HIF1A
IRS1	Insulin Receptor Substrate 1	Protein Coding	P35568	61	GC02M226731	1.73948	https://www.genecards.org/cgi-bin/carddisp.pl?gene=IRS1
DDIT3	DNA Damage Inducible Transcript 3	Protein Coding	P35638	60	GC12M057516	1.73948	https://www.genecards.org/cgi-bin/carddisp.pl?gene=DDIT3
SLC2A4	Solute Carrier Family 2 Member 4	Protein Coding	P14672	60	GC17P121899	1.73948	https://www.genecards.org/cgi-bin/carddisp.pl?gene=SLC2A4
AGER	Advanced Glycosylation End-Product Specific Receptor	Protein Coding	Q15109	59	GC06M032180	1.73948	https://www.genecards.org/cgi-bin/carddisp.pl?gene=AGER
CCN2	Cellular Communication Network Factor 2	Protein Coding	P29279	59	GC06M131948	1.73948	https://www.genecards.org/cgi-bin/carddisp.pl?gene=CCN2
UCP2	Uncoupling Protein 2	Protein Coding	P55851	59	GC11M073974	1.73948	https://www.genecards.org/cgi-bin/carddisp.pl?gene=UCP2
XBP1	X-Box Binding Protein 1	Protein Coding	P17861	59	GC22M028794	1.73948	https://www.genecards.org/cgi-bin/carddisp.pl?gene=XBP1
SPHK1	Sphingosine Kinase 1	Protein Coding	Q9NYA1	58	GC17P076376	1.73948	https://www.genecards.org/cgi-bin/carddisp.pl?gene=SPHK1
ARRB1	Arrestin Beta 1	Protein Coding	P49407	57	GC11M129349	1.73948	https://www.genecards.org/cgi-bin/carddisp.pl?gene=ARRB1
AKR1A1	Aldo-Keto Reductase Family 1 Member A1	Protein Coding	P14550	56	GC01P045550	1.73948	https://www.genecards.org/cgi-bin/carddisp.pl?gene=AKR1A1
ALPP	Alkaline Phosphatase, Placental	Protein Coding	P05187	56	GC02P232378	1.73948	https://www.genecards.org/cgi-bin/carddisp.pl?gene=ALPP
NOX4	NADPH Oxidase 4	Protein Coding	Q9NPH5	55	GC11M089324	1.73948	https://www.genecards.org/cgi-bin/carddisp.pl?gene=NOX4
CIDEC	Cell Death Inducing DFFA Like Effector C	Protein Coding	Q96AQ7	54	GC03M009866	1.73948	https://www.genecards.org/cgi-bin/carddisp.pl?gene=CIDEC
LPA	Lipoprotein(A)	Protein Coding	P08519	54	GC06M160531	1.73948	https://www.genecards.org/cgi-bin/carddisp.pl?gene=LPA
MORF4L1	Mortality Factor 4 Like 1	Protein Coding	Q9UBU8	52	GC15P078810	1.73948	https://www.genecards.org/cgi-bin/carddisp.pl?gene=MORF4L1
CYGB	Cytoglobin	Protein Coding	Q8WWM9	51	GC17M076527	1.73948	https://www.genecards.org/cgi-bin/carddisp.pl?gene=CYGB
ZBTB17	Zinc Finger And BTB Domain Containing 17	Protein Coding	Q13105	51	GC01M015943	1.73948	https://www.genecards.org/cgi-bin/carddisp.pl?gene=ZBTB17
SFRP5	Secreted Frizzled Related Protein 5	Protein Coding	Q5T4F7	48	GC10M097766	1.73948	https://www.genecards.org/cgi-bin/carddisp.pl?gene=SFRP5
VMP1	Vacuole Membrane Protein 1	Protein Coding	Q96GC9	48	GC17P059707	1.73948	https://www.genecards.org/cgi-bin/carddisp.pl?gene=VMP1
TERC	Telomerase RNA Component	RNA Gene		39	GC03M169765	1.73948	https://www.genecards.org/cgi-bin/carddisp.pl?gene=TERC
MIR582	MicroRNA 582	RNA Gene		29	GC05M059703	1.73948	https://www.genecards.org/cgi-bin/carddisp.pl?gene=MIR582
MIR33B	MicroRNA 33b	RNA Gene		28	GC17M017813	1.73948	https://www.genecards.org/cgi-bin/carddisp.pl?gene=MIR33B
LEPQTL1	Leptin, Serum Levels Of	Genetic Locus		11	GC02U903086	1.73948	https://www.genecards.org/cgi-bin/carddisp.pl?gene=LEPQTL1
MTOR	Mechanistic Target Of Rapamycin Kinase	Protein Coding	P42345	68	GC01M011106	1.61815	https://www.genecards.org/cgi-bin/carddisp.pl?gene=MTOR
PTPN11	Protein Tyrosine Phosphatase Non-Receptor Type 11	Protein Coding	Q06124	67	GC12P112418	1.61815	https://www.genecards.org/cgi-bin/carddisp.pl?gene=PTPN11
CXCR4	C-X-C Motif Chemokine Receptor 4	Protein Coding	P61073	66	GC02M136114	1.61815	https://www.genecards.org/cgi-bin/carddisp.pl?gene=CXCR4
SOD1	Superoxide Dismutase 1	Protein Coding	P00441	66	GC21P031659	1.61815	https://www.genecards.org/cgi-bin/carddisp.pl?gene=SOD1
TLR2	Toll Like Receptor 2	Protein Coding	O60603	65	GC04P153684	1.61815	https://www.genecards.org/cgi-bin/carddisp.pl?gene=TLR2
BAX	BCL2 Associated X, Apoptosis Regulator	Protein Coding	Q07812	64	GC19P048954	1.61815	https://www.genecards.org/cgi-bin/carddisp.pl?gene=BAX
FAS	Fas Cell Surface Death Receptor	Protein Coding	P25445	64	GC10P112626	1.61815	https://www.genecards.org/cgi-bin/carddisp.pl?gene=FAS
SERPINE1	Serpin Family E Member 1	Protein Coding	P05121	64	GC07P101127	1.61815	https://www.genecards.org/cgi-bin/carddisp.pl?gene=SERPINE1
TLR4	Toll Like Receptor 4	Protein Coding	O00206	64	GC09P117704	1.61815	https://www.genecards.org/cgi-bin/carddisp.pl?gene=TLR4
CPT2	Carnitine Palmitoyltransferase 2	Protein Coding	P23786	63	GC01P053196	1.61815	https://www.genecards.org/cgi-bin/carddisp.pl?gene=CPT2
PTPN1	Protein Tyrosine Phosphatase Non-Receptor Type 1	Protein Coding	P18031	63	GC20P050510	1.61815	https://www.genecards.org/cgi-bin/carddisp.pl?gene=PTPN1
ACACA	Acetyl-CoA Carboxylase Alpha	Protein Coding	Q13085	62	GC17M037084	1.61815	https://www.genecards.org/cgi-bin/carddisp.pl?gene=ACACA
GLS	Glutaminase	Protein Coding	O94925	62	GC02P190880	1.61815	https://www.genecards.org/cgi-bin/carddisp.pl?gene=GLS
FLNA	Filamin A	Protein Coding	P21333	61	GC0XM154348	1.61815	https://www.genecards.org/cgi-bin/carddisp.pl?gene=FLNA
SCARB1	Scavenger Receptor Class B Member 1	Protein Coding	Q8WTV0	60	GC12M124776	1.61815	https://www.genecards.org/cgi-bin/carddisp.pl?gene=SCARB1
SLC5A2	Solute Carrier Family 5 Member 2	Protein Coding	P31639	60	GC16P096791	1.61815	https://www.genecards.org/cgi-bin/carddisp.pl?gene=SLC5A2
XDH	Xanthine Dehydrogenase	Protein Coding	P47989	60	GC02M031334	1.61815	https://www.genecards.org/cgi-bin/carddisp.pl?gene=XDH
ACACB	Acetyl-CoA Carboxylase Beta	Protein Coding	O00763	59	GC12P109116	1.61815	https://www.genecards.org/cgi-bin/carddisp.pl?gene=ACACB
THBS1	Thrombospondin 1	Protein Coding	P07996	59	GC15P039581	1.61815	https://www.genecards.org/cgi-bin/carddisp.pl?gene=THBS1
TLR9	Toll Like Receptor 9	Protein Coding	Q9NR96	59	GC03M054152	1.61815	https://www.genecards.org/cgi-bin/carddisp.pl?gene=TLR9
CSF1	Colony Stimulating Factor 1	Protein Coding	P09603	58	GC01P109911	1.61815	https://www.genecards.org/cgi-bin/carddisp.pl?gene=CSF1
GOT1	Glutamic-Oxaloacetic Transaminase 1	Protein Coding	P17174	58	GC10M099396	1.61815	https://www.genecards.org/cgi-bin/carddisp.pl?gene=GOT1
MST1	Macrophage Stimulating 1	Protein Coding	P26927	58	GC03M049683	1.61815	https://www.genecards.org/cgi-bin/carddisp.pl?gene=MST1
MUTYH	MutY DNA Glycosylase	Protein Coding	Q9UIF7	58	GC01M045329	1.61815	https://www.genecards.org/cgi-bin/carddisp.pl?gene=MUTYH
SHC1	SHC Adaptor Protein 1	Protein Coding	P29353	58	GC01M154962	1.61815	https://www.genecards.org/cgi-bin/carddisp.pl?gene=SHC1
TFR2	Transferrin Receptor 2	Protein Coding	Q9UP52	58	GC07M100620	1.61815	https://www.genecards.org/cgi-bin/carddisp.pl?gene=TFR2
CPB2	Carboxypeptidase B2	Protein Coding	Q96IY4	57	GC13M046053	1.61815	https://www.genecards.org/cgi-bin/carddisp.pl?gene=CPB2
GNMT	Glycine N-Methyltransferase	Protein Coding	Q14749	57	GC06P042960	1.61815	https://www.genecards.org/cgi-bin/carddisp.pl?gene=GNMT
IL18	Interleukin 18	Protein Coding	Q14116	57	GC11M112143	1.61815	https://www.genecards.org/cgi-bin/carddisp.pl?gene=IL18
CCR1	C-C Motif Chemokine Receptor 1	Protein Coding	P32246	56	GC03M046218	1.61815	https://www.genecards.org/cgi-bin/carddisp.pl?gene=CCR1
LBP	Lipopolysaccharide Binding Protein	Protein Coding	P18428	56	GC20P038346	1.61815	https://www.genecards.org/cgi-bin/carddisp.pl?gene=LBP
S100A9	S100 Calcium Binding Protein A9	Protein Coding	P06702	56	GC01P153357	1.61815	https://www.genecards.org/cgi-bin/carddisp.pl?gene=S100A9
ADH1A	Alcohol Dehydrogenase 1A (Class I), Alpha Polypeptide	Protein Coding	P07327	55	GC04M099276	1.61815	https://www.genecards.org/cgi-bin/carddisp.pl?gene=ADH1A
ATP5F1E	ATP Synthase F1 Subunit Epsilon	Protein Coding	P56381	54	GC20M059026	1.61815	https://www.genecards.org/cgi-bin/carddisp.pl?gene=ATP5F1E
CDKN3	Cyclin Dependent Kinase Inhibitor 3	Protein Coding	Q16667	54	GC14P054401	1.61815	https://www.genecards.org/cgi-bin/carddisp.pl?gene=CDKN3
CSF3	Colony Stimulating Factor 3	Protein Coding	P09919	54	GC17P040015	1.61815	https://www.genecards.org/cgi-bin/carddisp.pl?gene=CSF3
CXCR5	C-X-C Motif Chemokine Receptor 5	Protein Coding	P32302	54	GC11P122789	1.61815	https://www.genecards.org/cgi-bin/carddisp.pl?gene=CXCR5
PYCARD	PYD And CARD Domain Containing	Protein Coding	Q9ULZ3	54	GC16M031201	1.61815	https://www.genecards.org/cgi-bin/carddisp.pl?gene=PYCARD
CCL4	C-C Motif Chemokine Ligand 4	Protein Coding	P13236	53	GC17P036103	1.61815	https://www.genecards.org/cgi-bin/carddisp.pl?gene=CCL4
CCN1	Cellular Communication Network Factor 1	Protein Coding	O00622	53	GC01P085585	1.61815	https://www.genecards.org/cgi-bin/carddisp.pl?gene=CCN1
CMKLR1	Chemerin Chemokine-Like Receptor 1	Protein Coding	Q99788	53	GC12M108288	1.61815	https://www.genecards.org/cgi-bin/carddisp.pl?gene=CMKLR1
ADAMTSL2	ADAMTS Like 2	Protein Coding	Q86TH1	52	GC09P144185	1.61815	https://www.genecards.org/cgi-bin/carddisp.pl?gene=ADAMTSL2
CCN6	Cellular Communication Network Factor 6	Protein Coding	O95389	52	GC06P145894	1.61815	https://www.genecards.org/cgi-bin/carddisp.pl?gene=CCN6
CYP2J2	Cytochrome P450 Family 2 Subfamily J Member 2	Protein Coding	P51589	52	GC01M059893	1.61815	https://www.genecards.org/cgi-bin/carddisp.pl?gene=CYP2J2
ELOVL6	ELOVL Fatty Acid Elongase 6	Protein Coding	Q9H5J4	52	GC04M110045	1.61815	https://www.genecards.org/cgi-bin/carddisp.pl?gene=ELOVL6
LTB	Lymphotoxin Beta	Protein Coding	Q06643	52	GC06M097108	1.61815	https://www.genecards.org/cgi-bin/carddisp.pl?gene=LTB
CCRL2	C-C Motif Chemokine Receptor Like 2	Protein Coding	O00421	51	GC03P046407	1.61815	https://www.genecards.org/cgi-bin/carddisp.pl?gene=CCRL2
SLC38A1	Solute Carrier Family 38 Member 1	Protein Coding	Q9H2H9	51	GC12M046183	1.61815	https://www.genecards.org/cgi-bin/carddisp.pl?gene=SLC38A1
WWTR1	WW Domain Containing Transcription Regulator 1	Protein Coding	Q9GZV5	51	GC03M149517	1.61815	https://www.genecards.org/cgi-bin/carddisp.pl?gene=WWTR1
LPCAT3	Lysophosphatidylcholine Acyltransferase 3	Protein Coding	Q6P1A2	50	GC12M006976	1.61815	https://www.genecards.org/cgi-bin/carddisp.pl?gene=LPCAT3
SFTA3	Surfactant Associated 3	RNA Gene	P0C7M3	44	GC14M036479	1.61815	https://www.genecards.org/cgi-bin/carddisp.pl?gene=SFTA3
TLCD1	TLC Domain Containing 1	Protein Coding	Q96CP7	41	GC17M028724	1.61815	https://www.genecards.org/cgi-bin/carddisp.pl?gene=TLCD1
TLCD2	TLC Domain Containing 2	Protein Coding	A6NGC4	36	GC17M001702	1.61815	https://www.genecards.org/cgi-bin/carddisp.pl?gene=TLCD2
MIR432	MicroRNA 432	RNA Gene		28	GC14P116899	1.61815	https://www.genecards.org/cgi-bin/carddisp.pl?gene=MIR432
SKAP1-AS2	SKAP1 Antisense RNA 2	RNA Gene		21	GC17P123283	1.61815	https://www.genecards.org/cgi-bin/carddisp.pl?gene=SKAP1-AS2
PLA2G4A	Phospholipase A2 Group IVA	Protein Coding	P47712	61	GC01P186798	1.45116	https://www.genecards.org/cgi-bin/carddisp.pl?gene=PLA2G4A
CYP26B1	Cytochrome P450 Family 26 Subfamily B Member 1	Protein Coding	Q9NR63	56	GC02M072129	1.45116	https://www.genecards.org/cgi-bin/carddisp.pl?gene=CYP26B1
DYSF	Dysferlin	Protein Coding	O75923	56	GC02P071453	1.45116	https://www.genecards.org/cgi-bin/carddisp.pl?gene=DYSF
NDUFA13	NADH:Ubiquinone Oxidoreductase Subunit A13	Protein Coding	Q9P0J0	56	GC19P019515	1.45116	https://www.genecards.org/cgi-bin/carddisp.pl?gene=NDUFA13
NDRG2	NDRG Family Member 2	Protein Coding	Q9UN36	50	GC14M021016	1.45116	https://www.genecards.org/cgi-bin/carddisp.pl?gene=NDRG2
GATAD2A	GATA Zinc Finger Domain Containing 2A	Protein Coding	Q86YP4	48	GC19P122634	1.45116	https://www.genecards.org/cgi-bin/carddisp.pl?gene=GATAD2A
MAU2	MAU2 Sister Chromatid Cohesion Factor	Protein Coding	Q9Y6X3	48	GC19P019320	1.45116	https://www.genecards.org/cgi-bin/carddisp.pl?gene=MAU2
PARVB	Parvin Beta	Protein Coding	Q9HBI1	48	GC22P043999	1.45116	https://www.genecards.org/cgi-bin/carddisp.pl?gene=PARVB
SUGP1	SURP And G-Patch Domain Containing 1	Protein Coding	Q8IWZ8	47	GC19M019276	1.45116	https://www.genecards.org/cgi-bin/carddisp.pl?gene=SUGP1
SAMM50	SAMM50 Sorting And Assembly Machinery Component	Protein Coding	Q9Y512	45	GC22P043955	1.45116	https://www.genecards.org/cgi-bin/carddisp.pl?gene=SAMM50
LEPROT	Leptin Receptor Overlapping Transcript	Protein Coding	O15243	44	GC01P065420	1.45116	https://www.genecards.org/cgi-bin/carddisp.pl?gene=LEPROT
ARHGEF40	Rho Guanine Nucleotide Exchange Factor 40	Protein Coding	Q8TER5	41	GC14P047787	1.45116	https://www.genecards.org/cgi-bin/carddisp.pl?gene=ARHGEF40
C1orf94	Chromosome 1 Open Reading Frame 94	Protein Coding	Q6P1W5	40	GC01P034166	1.45116	https://www.genecards.org/cgi-bin/carddisp.pl?gene=C1orf94
LINC01036	Long Intergenic Non-Protein Coding RNA 1036	RNA Gene		14	GC01P187071	1.45116	https://www.genecards.org/cgi-bin/carddisp.pl?gene=LINC01036
LINC01037	Long Intergenic Non-Protein Coding RNA 1037	RNA Gene		14	GC01P187413	1.45116	https://www.genecards.org/cgi-bin/carddisp.pl?gene=LINC01037
RPS20P10	Ribosomal Protein S20 Pseudogene 10	Pseudogene		8	GC02M071984	1.45116	https://www.genecards.org/cgi-bin/carddisp.pl?gene=RPS20P10
lnc-ARHGEF40-2		RNA Gene		6	GC14P047793	1.45116	https://www.genecards.org/cgi-bin/carddisp.pl?gene=lnc-ARHGEF40-2
lnc-TM6SF2-1		RNA Gene		6	GC19M096548	1.45116	https://www.genecards.org/cgi-bin/carddisp.pl?gene=lnc-TM6SF2-1
HSALNG0009116		RNA Gene		5	GC01P187072	1.45116	https://www.genecards.org/cgi-bin/carddisp.pl?gene=HSALNG0009116
HSALNG0015894		RNA Gene		5	GC02M071828	1.45116	https://www.genecards.org/cgi-bin/carddisp.pl?gene=HSALNG0015894
HSALNG0099859		RNA Gene		5	GC14M021069	1.45116	https://www.genecards.org/cgi-bin/carddisp.pl?gene=HSALNG0099859
HSALNG0015893		RNA Gene		4	GC02M071789	1.45116	https://www.genecards.org/cgi-bin/carddisp.pl?gene=HSALNG0015893
HSALNG0124715		RNA Gene		4	GC19P124212	1.45116	https://www.genecards.org/cgi-bin/carddisp.pl?gene=HSALNG0124715
lnc-SMIM12-1		RNA Gene		4	GC01M034319	1.45116	https://www.genecards.org/cgi-bin/carddisp.pl?gene=lnc-SMIM12-1
piR-45035-016		RNA Gene		4	GC01M187365	1.45116	https://www.genecards.org/cgi-bin/carddisp.pl?gene=piR-45035-016
HSALNG0135821		RNA Gene		3	GC22M079831	1.45116	https://www.genecards.org/cgi-bin/carddisp.pl?gene=HSALNG0135821
piR-37045		RNA Gene		3	GC22P076242	1.45116	https://www.genecards.org/cgi-bin/carddisp.pl?gene=piR-37045
MIF	Macrophage Migration Inhibitory Factor	Protein Coding	P14174	60	GC22P023894	1.32522	https://www.genecards.org/cgi-bin/carddisp.pl?gene=MIF
PEPD	Peptidase D	Protein Coding	P12955	58	GC19M033386	1.32522	https://www.genecards.org/cgi-bin/carddisp.pl?gene=PEPD
WTAP	WT1 Associated Protein	Protein Coding	Q15007	51	GC06P159725	1.32522	https://www.genecards.org/cgi-bin/carddisp.pl?gene=WTAP
PSG1	Pregnancy Specific Beta-1-Glycoprotein 1	Protein Coding	P11464	48	GC19M042866	1.32522	https://www.genecards.org/cgi-bin/carddisp.pl?gene=PSG1
MIR29A	MicroRNA 29a	RNA Gene		31	GC07M130876	1.32522	https://www.genecards.org/cgi-bin/carddisp.pl?gene=MIR29A
CCND1	Cyclin D1	Protein Coding	P24385	66	GC11P069641	1.15429	https://www.genecards.org/cgi-bin/carddisp.pl?gene=CCND1
F2	Coagulation Factor II, Thrombin	Protein Coding	P00734	63	GC11P048054	1.15429	https://www.genecards.org/cgi-bin/carddisp.pl?gene=F2
CD79B	CD79b Molecule	Protein Coding	P40259	58	GC17M063928	1.15429	https://www.genecards.org/cgi-bin/carddisp.pl?gene=CD79B
CD2	CD2 Molecule	Protein Coding	P06729	57	GC01P116754	1.15429	https://www.genecards.org/cgi-bin/carddisp.pl?gene=CD2
SPN	Sialophorin	Protein Coding	P16150	54	GC16P029662	1.15429	https://www.genecards.org/cgi-bin/carddisp.pl?gene=SPN
FUT4	Fucosyltransferase 4	Protein Coding	P22083	52	GC11P096335	1.15429	https://www.genecards.org/cgi-bin/carddisp.pl?gene=FUT4
VIL1	Villin 1	Protein Coding	P09327	51	GC02P218419	1.15429	https://www.genecards.org/cgi-bin/carddisp.pl?gene=VIL1
NAFLD1	Fatty Liver Disease 1, Susceptiblity To	Genetic Locus		5	GC22U901005	1.15429	https://www.genecards.org/cgi-bin/carddisp.pl?gene=NAFLD1
NAFLD2	Fatty Liver Disease, Nonalcoholic, Susceptibility To, 2	Genetic Locus		4	GC11U901533	1.15429	https://www.genecards.org/cgi-bin/carddisp.pl?gene=NAFLD2
APOB	Apolipoprotein B	Protein Coding	P04114	59	GC02M020956	0.775021	https://www.genecards.org/cgi-bin/carddisp.pl?gene=APOB
LEP	Leptin	Protein Coding	P41159	59	GC07P128241	0.775021	https://www.genecards.org/cgi-bin/carddisp.pl?gene=LEP
APOA1	Apolipoprotein A1	Protein Coding	P02647	63	GC11M116835	0.655013	https://www.genecards.org/cgi-bin/carddisp.pl?gene=APOA1
SPP1	Secreted Phosphoprotein 1	Protein Coding	P10451	57	GC04P087975	0.655013	https://www.genecards.org/cgi-bin/carddisp.pl?gene=SPP1
MIR146B	MicroRNA 146b	RNA Gene		31	GC10P102436	0.655013	https://www.genecards.org/cgi-bin/carddisp.pl?gene=MIR146B
MDM2	MDM2 Proto-Oncogene	Protein Coding	Q00987	67	GC12P068808	0.585861	https://www.genecards.org/cgi-bin/carddisp.pl?gene=MDM2
NFE2L2	NFE2 Like BZIP Transcription Factor 2	Protein Coding	Q16236	64	GC02M177227	0.585861	https://www.genecards.org/cgi-bin/carddisp.pl?gene=NFE2L2
FAM215A	Family With Sequence Similarity 215 Member A	RNA Gene	Q9Y5M1	32	GC17P043917	0.585861	https://www.genecards.org/cgi-bin/carddisp.pl?gene=FAM215A
SMAD5-AS1	SMAD5 Antisense RNA 1	RNA Gene	Q9Y6J3	31	GC05M136129	0.585861	https://www.genecards.org/cgi-bin/carddisp.pl?gene=SMAD5-AS1
TRA-TGC7-1	TRNA-Ala (Anticodon TGC) 7-1	RNA Gene		15	GC06M096896	0.585861	https://www.genecards.org/cgi-bin/carddisp.pl?gene=TRA-TGC7-1
CYP17A1	Cytochrome P450 Family 17 Subfamily A Member 1	Protein Coding	P05093	62	GC10M102830	0.507371	https://www.genecards.org/cgi-bin/carddisp.pl?gene=CYP17A1
NOS2	Nitric Oxide Synthase 2	Protein Coding	P35228	62	GC17M027756	0.507371	https://www.genecards.org/cgi-bin/carddisp.pl?gene=NOS2
SREBF1	Sterol Regulatory Element Binding Transcription Factor 1	Protein Coding	P36956	62	GC17M017810	0.507371	https://www.genecards.org/cgi-bin/carddisp.pl?gene=SREBF1
LIPA	Lipase A, Lysosomal Acid Type	Protein Coding	P38571	61	GC10M089213	0.507371	https://www.genecards.org/cgi-bin/carddisp.pl?gene=LIPA
CRP	C-Reactive Protein	Protein Coding	P02741	59	GC01M164127	0.507371	https://www.genecards.org/cgi-bin/carddisp.pl?gene=CRP
GCLC	Glutamate-Cysteine Ligase Catalytic Subunit	Protein Coding	P48506	59	GC06M053497	0.507371	https://www.genecards.org/cgi-bin/carddisp.pl?gene=GCLC
ADIPOR1	Adiponectin Receptor 1	Protein Coding	Q96A54	57	GC01M202940	0.507371	https://www.genecards.org/cgi-bin/carddisp.pl?gene=ADIPOR1
FGF19	Fibroblast Growth Factor 19	Protein Coding	O95750	56	GC11M129189	0.507371	https://www.genecards.org/cgi-bin/carddisp.pl?gene=FGF19
RETN	Resistin	Protein Coding	Q9HD89	55	GC19P007669	0.507371	https://www.genecards.org/cgi-bin/carddisp.pl?gene=RETN
ADIPOR2	Adiponectin Receptor 2	Protein Coding	Q86V24	54	GC12P001670	0.507371	https://www.genecards.org/cgi-bin/carddisp.pl?gene=ADIPOR2
SLU7	SLU7 Homolog, Splicing Factor	Protein Coding	O95391	45	GC05M160401	0.507371	https://www.genecards.org/cgi-bin/carddisp.pl?gene=SLU7
BDNF-AS	BDNF Antisense RNA	RNA Gene		31	GC11P027466	0.507371	https://www.genecards.org/cgi-bin/carddisp.pl?gene=BDNF-AS
HULC	Hepatocellular Carcinoma Up-Regulated Long Non-Coding RNA	RNA Gene		29	GC06P008486	0.507371	https://www.genecards.org/cgi-bin/carddisp.pl?gene=HULC
MIR181D	MicroRNA 181d	RNA Gene		28	GC19P013874	0.507371	https://www.genecards.org/cgi-bin/carddisp.pl?gene=MIR181D
ERBB2	Erb-B2 Receptor Tyrosine Kinase 2	Protein Coding	P04626	68	GC17P039687	0.414266	https://www.genecards.org/cgi-bin/carddisp.pl?gene=ERBB2
KRAS	KRAS Proto-Oncogene, GTPase	Protein Coding	P01116	66	GC12M031027	0.414266	https://www.genecards.org/cgi-bin/carddisp.pl?gene=KRAS
AR	Androgen Receptor	Protein Coding	P10275	64	GC0XP067544	0.414266	https://www.genecards.org/cgi-bin/carddisp.pl?gene=AR
EGF	Epidermal Growth Factor	Protein Coding	P01133	64	GC04P109912	0.414266	https://www.genecards.org/cgi-bin/carddisp.pl?gene=EGF
ABCA1	ATP Binding Cassette Subfamily A Member 1	Protein Coding	O95477	62	GC09M104781	0.414266	https://www.genecards.org/cgi-bin/carddisp.pl?gene=ABCA1
CASP3	Caspase 3	Protein Coding	P42574	62	GC04M184627	0.414266	https://www.genecards.org/cgi-bin/carddisp.pl?gene=CASP3
CPS1	Carbamoyl-Phosphate Synthase 1	Protein Coding	P31327	62	GC02P210477	0.414266	https://www.genecards.org/cgi-bin/carddisp.pl?gene=CPS1
DPP4	Dipeptidyl Peptidase 4	Protein Coding	P27487	62	GC02M161992	0.414266	https://www.genecards.org/cgi-bin/carddisp.pl?gene=DPP4
FASN	Fatty Acid Synthase	Protein Coding	P49327	62	GC17M082078	0.414266	https://www.genecards.org/cgi-bin/carddisp.pl?gene=FASN
ATP7B	ATPase Copper Transporting Beta	Protein Coding	P35670	61	GC13M051930	0.414266	https://www.genecards.org/cgi-bin/carddisp.pl?gene=ATP7B
MAP3K5	Mitogen-Activated Protein Kinase Kinase Kinase 5	Protein Coding	Q99683	61	GC06M136557	0.414266	https://www.genecards.org/cgi-bin/carddisp.pl?gene=MAP3K5
FTO	FTO Alpha-Ketoglutarate Dependent Dioxygenase	Protein Coding	Q9C0B1	59	GC16P097259	0.414266	https://www.genecards.org/cgi-bin/carddisp.pl?gene=FTO
HSPA1A	Heat Shock Protein Family A (Hsp70) Member 1A	Protein Coding	P0DMV8	59	GC06P144781	0.414266	https://www.genecards.org/cgi-bin/carddisp.pl?gene=HSPA1A
PHB1	Prohibitin 1	Protein Coding	P35232	59	GC17M085589	0.414266	https://www.genecards.org/cgi-bin/carddisp.pl?gene=PHB1
SP1	Sp1 Transcription Factor	Protein Coding	P08047	59	GC12P053380	0.414266	https://www.genecards.org/cgi-bin/carddisp.pl?gene=SP1
NR1H2	Nuclear Receptor Subfamily 1 Group H Member 2	Protein Coding	P55055	58	GC19P050329	0.414266	https://www.genecards.org/cgi-bin/carddisp.pl?gene=NR1H2
STAR	Steroidogenic Acute Regulatory Protein	Protein Coding	P49675	58	GC08M038333	0.414266	https://www.genecards.org/cgi-bin/carddisp.pl?gene=STAR
TIMP1	TIMP Metallopeptidase Inhibitor 1	Protein Coding	P01033	58	GC0XP058331	0.414266	https://www.genecards.org/cgi-bin/carddisp.pl?gene=TIMP1
ABCB7	ATP Binding Cassette Subfamily B Member 7	Protein Coding	O75027	57	GC0XM075053	0.414266	https://www.genecards.org/cgi-bin/carddisp.pl?gene=ABCB7
CCL5	C-C Motif Chemokine Ligand 5	Protein Coding	P13501	56	GC17M035871	0.414266	https://www.genecards.org/cgi-bin/carddisp.pl?gene=CCL5
CHIT1	Chitinase 1	Protein Coding	Q13231	56	GC01M203213	0.414266	https://www.genecards.org/cgi-bin/carddisp.pl?gene=CHIT1
GDF15	Growth Differentiation Factor 15	Protein Coding	Q99988	56	GC19P122626	0.414266	https://www.genecards.org/cgi-bin/carddisp.pl?gene=GDF15
KRT7	Keratin 7	Protein Coding	P08729	56	GC12P052232	0.414266	https://www.genecards.org/cgi-bin/carddisp.pl?gene=KRT7
MMP10	Matrix Metallopeptidase 10	Protein Coding	P09238	56	GC11M102770	0.414266	https://www.genecards.org/cgi-bin/carddisp.pl?gene=MMP10
MMP11	Matrix Metallopeptidase 11	Protein Coding	P24347	56	GC22P023768	0.414266	https://www.genecards.org/cgi-bin/carddisp.pl?gene=MMP11
GCG	Glucagon	Protein Coding	P01275	55	GC02M162142	0.414266	https://www.genecards.org/cgi-bin/carddisp.pl?gene=GCG
TIMP2	TIMP Metallopeptidase Inhibitor 2	Protein Coding	P16035	54	GC17M078852	0.414266	https://www.genecards.org/cgi-bin/carddisp.pl?gene=TIMP2
BBC3	BCL2 Binding Component 3	Protein Coding	Q96PG8	53	GC19M047220	0.414266	https://www.genecards.org/cgi-bin/carddisp.pl?gene=BBC3
NDUFB3	NADH:Ubiquinone Oxidoreductase Subunit B3	Protein Coding	O43676	53	GC02P201071	0.414266	https://www.genecards.org/cgi-bin/carddisp.pl?gene=NDUFB3
MBOAT7	Membrane Bound O-Acyltransferase Domain Containing 7	Protein Coding	Q96N66	52	GC19M054173	0.414266	https://www.genecards.org/cgi-bin/carddisp.pl?gene=MBOAT7
SERPINA12	Serpin Family A Member 12	Protein Coding	Q8IW75	52	GC14M094487	0.414266	https://www.genecards.org/cgi-bin/carddisp.pl?gene=SERPINA12
HILPDA	Hypoxia Inducible Lipid Droplet Associated	Protein Coding	Q9Y5L2	44	GC07P137034	0.414266	https://www.genecards.org/cgi-bin/carddisp.pl?gene=HILPDA
TSC22D4	TSC22 Domain Family Member 4	Protein Coding	Q9Y3Q8	41	GC07M100463	0.414266	https://www.genecards.org/cgi-bin/carddisp.pl?gene=TSC22D4
PVT1	Pvt1 Oncogene	RNA Gene		35	GC08P128175	0.414266	https://www.genecards.org/cgi-bin/carddisp.pl?gene=PVT1
GAS5	Growth Arrest Specific 5	RNA Gene		33	GC01M173947	0.414266	https://www.genecards.org/cgi-bin/carddisp.pl?gene=GAS5
MIR182	MicroRNA 182	RNA Gene		31	GC07M129770	0.414266	https://www.genecards.org/cgi-bin/carddisp.pl?gene=MIR182
MIR214	MicroRNA 214	RNA Gene		31	GC01M172234	0.414266	https://www.genecards.org/cgi-bin/carddisp.pl?gene=MIR214
MIR320A	MicroRNA 320a	RNA Gene		31	GC08M022339	0.414266	https://www.genecards.org/cgi-bin/carddisp.pl?gene=MIR320A
MIR379	MicroRNA 379	RNA Gene		26	GC14P117910	0.414266	https://www.genecards.org/cgi-bin/carddisp.pl?gene=MIR379
VTRNA1-1	Vault RNA 1-1	RNA Gene		20	GC05P155316	0.414266	https://www.genecards.org/cgi-bin/carddisp.pl?gene=VTRNA1-1
CTSD	Cathepsin D	Protein Coding	P07339	66	GC11M001752	0.292931	https://www.genecards.org/cgi-bin/carddisp.pl?gene=CTSD
DNMT1	DNA Methyltransferase 1	Protein Coding	P26358	66	GC19M010133	0.292931	https://www.genecards.org/cgi-bin/carddisp.pl?gene=DNMT1
MMP2	Matrix Metallopeptidase 2	Protein Coding	P08253	66	GC16P097295	0.292931	https://www.genecards.org/cgi-bin/carddisp.pl?gene=MMP2
HMOX1	Heme Oxygenase 1	Protein Coding	P09601	65	GC22P035380	0.292931	https://www.genecards.org/cgi-bin/carddisp.pl?gene=HMOX1
ACE	Angiotensin I Converting Enzyme	Protein Coding	P12821	64	GC17P063477	0.292931	https://www.genecards.org/cgi-bin/carddisp.pl?gene=ACE
DNMT3A	DNA Methyltransferase 3 Alpha	Protein Coding	Q9Y6K1	64	GC02M025228	0.292931	https://www.genecards.org/cgi-bin/carddisp.pl?gene=DNMT3A
EPAS1	Endothelial PAS Domain Protein 1	Protein Coding	Q99814	64	GC02P046293	0.292931	https://www.genecards.org/cgi-bin/carddisp.pl?gene=EPAS1
MERTK	MER Proto-Oncogene, Tyrosine Kinase	Protein Coding	Q12866	64	GC02P111898	0.292931	https://www.genecards.org/cgi-bin/carddisp.pl?gene=MERTK
PPP2CA	Protein Phosphatase 2 Catalytic Subunit Alpha	Protein Coding	P67775	64	GC05M134194	0.292931	https://www.genecards.org/cgi-bin/carddisp.pl?gene=PPP2CA
PRKCA	Protein Kinase C Alpha	Protein Coding	P17252	64	GC17P066302	0.292931	https://www.genecards.org/cgi-bin/carddisp.pl?gene=PRKCA
SHH	Sonic Hedgehog Signaling Molecule	Protein Coding	Q15465	64	GC07M155799	0.292931	https://www.genecards.org/cgi-bin/carddisp.pl?gene=SHH
SMARCA4	SWI/SNF Related, Matrix Associated, Actin Dependent Regulator Of Chromatin, Subfamily A, Member 4	Protein Coding	P51532	64	GC19P122306	0.292931	https://www.genecards.org/cgi-bin/carddisp.pl?gene=SMARCA4
VIM	Vimentin	Protein Coding	P08670	64	GC10P017227	0.292931	https://www.genecards.org/cgi-bin/carddisp.pl?gene=VIM
CREB1	CAMP Responsive Element Binding Protein 1	Protein Coding	P16220	63	GC02P207529	0.292931	https://www.genecards.org/cgi-bin/carddisp.pl?gene=CREB1
GSR	Glutathione-Disulfide Reductase	Protein Coding	P00390	63	GC08M030678	0.292931	https://www.genecards.org/cgi-bin/carddisp.pl?gene=GSR
JUN	Jun Proto-Oncogene, AP-1 Transcription Factor Subunit	Protein Coding	P05412	63	GC01M058780	0.292931	https://www.genecards.org/cgi-bin/carddisp.pl?gene=JUN
LPL	Lipoprotein Lipase	Protein Coding	P06858	63	GC08P019901	0.292931	https://www.genecards.org/cgi-bin/carddisp.pl?gene=LPL
MMP13	Matrix Metallopeptidase 13	Protein Coding	P45452	63	GC11M102942	0.292931	https://www.genecards.org/cgi-bin/carddisp.pl?gene=MMP13
PCSK9	Proprotein Convertase Subtilisin/Kexin Type 9	Protein Coding	Q8NBP7	63	GC01P055039	0.292931	https://www.genecards.org/cgi-bin/carddisp.pl?gene=PCSK9
PRKDC	Protein Kinase, DNA-Activated, Catalytic Subunit	Protein Coding	P78527	63	GC08M047773	0.292931	https://www.genecards.org/cgi-bin/carddisp.pl?gene=PRKDC
RIPK1	Receptor Interacting Serine/Threonine Kinase 1	Protein Coding	Q13546	63	GC06P007000	0.292931	https://www.genecards.org/cgi-bin/carddisp.pl?gene=RIPK1
BMP4	Bone Morphogenetic Protein 4	Protein Coding	P12644	62	GC14M053949	0.292931	https://www.genecards.org/cgi-bin/carddisp.pl?gene=BMP4
CASP7	Caspase 7	Protein Coding	P55210	62	GC10P113679	0.292931	https://www.genecards.org/cgi-bin/carddisp.pl?gene=CASP7
CES1	Carboxylesterase 1	Protein Coding	P23141	62	GC16M055836	0.292931	https://www.genecards.org/cgi-bin/carddisp.pl?gene=CES1
HMGB1	High Mobility Group Box 1	Protein Coding	P09429	62	GC13M030456	0.292931	https://www.genecards.org/cgi-bin/carddisp.pl?gene=HMGB1
MYD88	MYD88 Innate Immune Signal Transduction Adaptor	Protein Coding	Q99836	62	GC03P038324	0.292931	https://www.genecards.org/cgi-bin/carddisp.pl?gene=MYD88
PRKCQ	Protein Kinase C Theta	Protein Coding	Q04759	62	GC10M006978	0.292931	https://www.genecards.org/cgi-bin/carddisp.pl?gene=PRKCQ
PTGS2	Prostaglandin-Endoperoxide Synthase 2	Protein Coding	P35354	62	GC01M186671	0.292931	https://www.genecards.org/cgi-bin/carddisp.pl?gene=PTGS2
TBP	TATA-Box Binding Protein	Protein Coding	P20226	62	GC06P170554	0.292931	https://www.genecards.org/cgi-bin/carddisp.pl?gene=TBP
USP7	Ubiquitin Specific Peptidase 7	Protein Coding	Q93009	62	GC16M008892	0.292931	https://www.genecards.org/cgi-bin/carddisp.pl?gene=USP7
VCP	Valosin Containing Protein	Protein Coding	P55072	62	GC09M035298	0.292931	https://www.genecards.org/cgi-bin/carddisp.pl?gene=VCP
ADRB1	Adrenoceptor Beta 1	Protein Coding	P08588	61	GC10P115236	0.292931	https://www.genecards.org/cgi-bin/carddisp.pl?gene=ADRB1
CYP3A4	Cytochrome P450 Family 3 Subfamily A Member 4	Protein Coding	P08684	61	GC07M105725	0.292931	https://www.genecards.org/cgi-bin/carddisp.pl?gene=CYP3A4
DICER1	Dicer 1, Ribonuclease III	Protein Coding	Q9UPY3	61	GC14M095086	0.292931	https://www.genecards.org/cgi-bin/carddisp.pl?gene=DICER1
KEAP1	Kelch Like ECH Associated Protein 1	Protein Coding	Q14145	61	GC19M010486	0.292931	https://www.genecards.org/cgi-bin/carddisp.pl?gene=KEAP1
MTHFR	Methylenetetrahydrofolate Reductase	Protein Coding	P42898	61	GC01M011785	0.292931	https://www.genecards.org/cgi-bin/carddisp.pl?gene=MTHFR
ABCB4	ATP Binding Cassette Subfamily B Member 4	Protein Coding	P21439	60	GC07M087365	0.292931	https://www.genecards.org/cgi-bin/carddisp.pl?gene=ABCB4
ACTA2	Actin Alpha 2, Smooth Muscle	Protein Coding	P62736	60	GC10M088935	0.292931	https://www.genecards.org/cgi-bin/carddisp.pl?gene=ACTA2
CLU	Clusterin	Protein Coding	P10909	60	GC08M027596	0.292931	https://www.genecards.org/cgi-bin/carddisp.pl?gene=CLU
DGAT1	Diacylglycerol O-Acyltransferase 1	Protein Coding	O75907	60	GC08M146799	0.292931	https://www.genecards.org/cgi-bin/carddisp.pl?gene=DGAT1
GLP1R	Glucagon Like Peptide 1 Receptor	Protein Coding	P43220	60	GC06P039048	0.292931	https://www.genecards.org/cgi-bin/carddisp.pl?gene=GLP1R
GRK2	G Protein-Coupled Receptor Kinase 2	Protein Coding	P25098	60	GC11P067266	0.292931	https://www.genecards.org/cgi-bin/carddisp.pl?gene=GRK2
IL1B	Interleukin 1 Beta	Protein Coding	P01584	60	GC02M112829	0.292931	https://www.genecards.org/cgi-bin/carddisp.pl?gene=IL1B
KRT8	Keratin 8	Protein Coding	P05787	60	GC12M052897	0.292931	https://www.genecards.org/cgi-bin/carddisp.pl?gene=KRT8
LPIN1	Lipin 1	Protein Coding	Q14693	60	GC02P011677	0.292931	https://www.genecards.org/cgi-bin/carddisp.pl?gene=LPIN1
MAPK9	Mitogen-Activated Protein Kinase 9	Protein Coding	P45984	60	GC05M180318	0.292931	https://www.genecards.org/cgi-bin/carddisp.pl?gene=MAPK9
NAMPT	Nicotinamide Phosphoribosyltransferase	Protein Coding	P43490	60	GC07M106248	0.292931	https://www.genecards.org/cgi-bin/carddisp.pl?gene=NAMPT
PIN1	Peptidylprolyl Cis/Trans Isomerase, NIMA-Interacting 1	Protein Coding	Q13526	60	GC19P009835	0.292931	https://www.genecards.org/cgi-bin/carddisp.pl?gene=PIN1
ABCB11	ATP Binding Cassette Subfamily B Member 11	Protein Coding	O95342	59	GC02M168922	0.292931	https://www.genecards.org/cgi-bin/carddisp.pl?gene=ABCB11
ATF4	Activating Transcription Factor 4	Protein Coding	P18848	59	GC22P039519	0.292931	https://www.genecards.org/cgi-bin/carddisp.pl?gene=ATF4
BIRC5	Baculoviral IAP Repeat Containing 5	Protein Coding	O15392	59	GC17P078214	0.292931	https://www.genecards.org/cgi-bin/carddisp.pl?gene=BIRC5
CASP4	Caspase 4	Protein Coding	P49662	59	GC11M104942	0.292931	https://www.genecards.org/cgi-bin/carddisp.pl?gene=CASP4
CEBPA	CCAAT Enhancer Binding Protein Alpha	Protein Coding	P49715	59	GC19M033299	0.292931	https://www.genecards.org/cgi-bin/carddisp.pl?gene=CEBPA
FAP	Fibroblast Activation Protein Alpha	Protein Coding	Q12884	59	GC02M162170	0.292931	https://www.genecards.org/cgi-bin/carddisp.pl?gene=FAP
IRS2	Insulin Receptor Substrate 2	Protein Coding	Q9Y4H2	59	GC13M109752	0.292931	https://www.genecards.org/cgi-bin/carddisp.pl?gene=IRS2
LOXL2	Lysyl Oxidase Like 2	Protein Coding	Q9Y4K0	59	GC08M023296	0.292931	https://www.genecards.org/cgi-bin/carddisp.pl?gene=LOXL2
VCAM1	Vascular Cell Adhesion Molecule 1	Protein Coding	P19320	59	GC01P100719	0.292931	https://www.genecards.org/cgi-bin/carddisp.pl?gene=VCAM1
AHSG	Alpha 2-HS Glycoprotein	Protein Coding	P02765	58	GC03P186658	0.292931	https://www.genecards.org/cgi-bin/carddisp.pl?gene=AHSG
APOC3	Apolipoprotein C3	Protein Coding	P02656	58	GC11P116829	0.292931	https://www.genecards.org/cgi-bin/carddisp.pl?gene=APOC3
AVP	Arginine Vasopressin	Protein Coding	P01185	58	GC20M003082	0.292931	https://www.genecards.org/cgi-bin/carddisp.pl?gene=AVP
CEBPB	CCAAT Enhancer Binding Protein Beta	Protein Coding	P17676	58	GC20P050190	0.292931	https://www.genecards.org/cgi-bin/carddisp.pl?gene=CEBPB
CHI3L1	Chitinase 3 Like 1	Protein Coding	P36222	58	GC01M203148	0.292931	https://www.genecards.org/cgi-bin/carddisp.pl?gene=CHI3L1
ELK1	ETS Transcription Factor ELK1	Protein Coding	P19419	58	GC0XM047635	0.292931	https://www.genecards.org/cgi-bin/carddisp.pl?gene=ELK1
HBB	Hemoglobin Subunit Beta	Protein Coding	P68871	58	GC11M012709	0.292931	https://www.genecards.org/cgi-bin/carddisp.pl?gene=HBB
INHBA	Inhibin Subunit Beta A	Protein Coding	P08476	58	GC07M041670	0.292931	https://www.genecards.org/cgi-bin/carddisp.pl?gene=INHBA
KRT19	Keratin 19	Protein Coding	P08727	58	GC17M041523	0.292931	https://www.genecards.org/cgi-bin/carddisp.pl?gene=KRT19
RBP4	Retinol Binding Protein 4	Protein Coding	P02753	58	GC10M093591	0.292931	https://www.genecards.org/cgi-bin/carddisp.pl?gene=RBP4
RDH5	Retinol Dehydrogenase 5	Protein Coding	Q92781	58	GC12P055720	0.292931	https://www.genecards.org/cgi-bin/carddisp.pl?gene=RDH5
TLR6	Toll Like Receptor 6	Protein Coding	Q9Y2C9	58	GC04M038828	0.292931	https://www.genecards.org/cgi-bin/carddisp.pl?gene=TLR6
ULK1	Unc-51 Like Autophagy Activating Kinase 1	Protein Coding	O75385	58	GC12P131894	0.292931	https://www.genecards.org/cgi-bin/carddisp.pl?gene=ULK1
BMP6	Bone Morphogenetic Protein 6	Protein Coding	P22004	57	GC06P007726	0.292931	https://www.genecards.org/cgi-bin/carddisp.pl?gene=BMP6
CD163	CD163 Molecule	Protein Coding	Q86VB7	57	GC12M030732	0.292931	https://www.genecards.org/cgi-bin/carddisp.pl?gene=CD163
CFLAR	CASP8 And FADD Like Apoptosis Regulator	Protein Coding	O15519	57	GC02P203926	0.292931	https://www.genecards.org/cgi-bin/carddisp.pl?gene=CFLAR
CLCN2	Chloride Voltage-Gated Channel 2	Protein Coding	P51788	57	GC03M184346	0.292931	https://www.genecards.org/cgi-bin/carddisp.pl?gene=CLCN2
CLOCK	Clock Circadian Regulator	Protein Coding	O15516	57	GC04M055427	0.292931	https://www.genecards.org/cgi-bin/carddisp.pl?gene=CLOCK
CXCR3	C-X-C Motif Chemokine Receptor 3	Protein Coding	P49682	57	GC0XM071615	0.292931	https://www.genecards.org/cgi-bin/carddisp.pl?gene=CXCR3
DROSHA	Drosha Ribonuclease III	Protein Coding	Q9NRR4	57	GC05M031401	0.292931	https://www.genecards.org/cgi-bin/carddisp.pl?gene=DROSHA
GPNMB	Glycoprotein Nmb	Protein Coding	Q14956	57	GC07P024232	0.292931	https://www.genecards.org/cgi-bin/carddisp.pl?gene=GPNMB
HMMR	Hyaluronan Mediated Motility Receptor	Protein Coding	O75330	57	GC05P163469	0.292931	https://www.genecards.org/cgi-bin/carddisp.pl?gene=HMMR
ITGA8	Integrin Subunit Alpha 8	Protein Coding	P53708	57	GC10M015513	0.292931	https://www.genecards.org/cgi-bin/carddisp.pl?gene=ITGA8
NR1I3	Nuclear Receptor Subfamily 1 Group I Member 3	Protein Coding	Q14994	57	GC01M161229	0.292931	https://www.genecards.org/cgi-bin/carddisp.pl?gene=NR1I3
PDE4A	Phosphodiesterase 4A	Protein Coding	P27815	57	GC19P010416	0.292931	https://www.genecards.org/cgi-bin/carddisp.pl?gene=PDE4A
SELE	Selectin E	Protein Coding	P16581	57	GC01M169722	0.292931	https://www.genecards.org/cgi-bin/carddisp.pl?gene=SELE
TUBA8	Tubulin Alpha 8	Protein Coding	Q9NY65	57	GC22P018110	0.292931	https://www.genecards.org/cgi-bin/carddisp.pl?gene=TUBA8
ABCG1	ATP Binding Cassette Subfamily G Member 1	Protein Coding	P45844	56	GC21P042199	0.292931	https://www.genecards.org/cgi-bin/carddisp.pl?gene=ABCG1
COX6B1	Cytochrome C Oxidase Subunit 6B1	Protein Coding	P14854	56	GC19P122929	0.292931	https://www.genecards.org/cgi-bin/carddisp.pl?gene=COX6B1
DGCR8	DGCR8 Microprocessor Complex Subunit	Protein Coding	Q8WYQ5	56	GC22P020080	0.292931	https://www.genecards.org/cgi-bin/carddisp.pl?gene=DGCR8
GREM1	Gremlin 1, DAN Family BMP Antagonist	Protein Coding	O60565	56	GC15P165907	0.292931	https://www.genecards.org/cgi-bin/carddisp.pl?gene=GREM1
LITAF	Lipopolysaccharide Induced TNF Factor	Protein Coding	Q99732	56	GC16M011547	0.292931	https://www.genecards.org/cgi-bin/carddisp.pl?gene=LITAF
NNMT	Nicotinamide N-Methyltransferase	Protein Coding	P40261	56	GC11P114257	0.292931	https://www.genecards.org/cgi-bin/carddisp.pl?gene=NNMT
NR1I2	Nuclear Receptor Subfamily 1 Group I Member 2	Protein Coding	O75469	56	GC03P119780	0.292931	https://www.genecards.org/cgi-bin/carddisp.pl?gene=NR1I2
OSM	Oncostatin M	Protein Coding	P13725	56	GC22M030262	0.292931	https://www.genecards.org/cgi-bin/carddisp.pl?gene=OSM
PER2	Period Circadian Regulator 2	Protein Coding	O15055	56	GC02M238244	0.292931	https://www.genecards.org/cgi-bin/carddisp.pl?gene=PER2
PRDX5	Peroxiredoxin 5	Protein Coding	P30044	56	GC11P094484	0.292931	https://www.genecards.org/cgi-bin/carddisp.pl?gene=PRDX5
SIRT5	Sirtuin 5	Protein Coding	Q9NXA8	56	GC06P013574	0.292931	https://www.genecards.org/cgi-bin/carddisp.pl?gene=SIRT5
SLC7A11	Solute Carrier Family 7 Member 11	Protein Coding	Q9UPY5	56	GC04M138164	0.292931	https://www.genecards.org/cgi-bin/carddisp.pl?gene=SLC7A11
TAOK1	TAO Kinase 1	Protein Coding	Q7L7X3	56	GC17P122522	0.292931	https://www.genecards.org/cgi-bin/carddisp.pl?gene=TAOK1
TRIM21	Tripartite Motif Containing 21	Protein Coding	P19474	56	GC11M004384	0.292931	https://www.genecards.org/cgi-bin/carddisp.pl?gene=TRIM21
CCK	Cholecystokinin	Protein Coding	P06307	55	GC03M042274	0.292931	https://www.genecards.org/cgi-bin/carddisp.pl?gene=CCK
GDF11	Growth Differentiation Factor 11	Protein Coding	O95390	55	GC12P055743	0.292931	https://www.genecards.org/cgi-bin/carddisp.pl?gene=GDF11
GSTM1	Glutathione S-Transferase Mu 1	Protein Coding	P09488	55	GC01P109687	0.292931	https://www.genecards.org/cgi-bin/carddisp.pl?gene=GSTM1
HBA1	Hemoglobin Subunit Alpha 1	Protein Coding	P69905	55	GC16P095730	0.292931	https://www.genecards.org/cgi-bin/carddisp.pl?gene=HBA1
POSTN	Periostin	Protein Coding	Q15063	55	GC13M037562	0.292931	https://www.genecards.org/cgi-bin/carddisp.pl?gene=POSTN
PRPF8	Pre-MRNA Processing Factor 8	Protein Coding	Q6P2Q9	55	GC17M001650	0.292931	https://www.genecards.org/cgi-bin/carddisp.pl?gene=PRPF8
SLC10A1	Solute Carrier Family 10 Member 1	Protein Coding	Q14973	55	GC14M069775	0.292931	https://www.genecards.org/cgi-bin/carddisp.pl?gene=SLC10A1
SUFU	SUFU Negative Regulator Of Hedgehog Signaling	Protein Coding	Q9UMX1	55	GC10P113124	0.292931	https://www.genecards.org/cgi-bin/carddisp.pl?gene=SUFU
UBE2D1	Ubiquitin Conjugating Enzyme E2 D1	Protein Coding	P51668	55	GC10P058334	0.292931	https://www.genecards.org/cgi-bin/carddisp.pl?gene=UBE2D1
ADH1C	Alcohol Dehydrogenase 1C (Class I), Gamma Polypeptide	Protein Coding	P00326	54	GC04M099336	0.292931	https://www.genecards.org/cgi-bin/carddisp.pl?gene=ADH1C
ATG3	Autophagy Related 3	Protein Coding	Q9NT62	54	GC03M112532	0.292931	https://www.genecards.org/cgi-bin/carddisp.pl?gene=ATG3
CCL3	C-C Motif Chemokine Ligand 3	Protein Coding	P10147	54	GC17M036088	0.292931	https://www.genecards.org/cgi-bin/carddisp.pl?gene=CCL3
IL11	Interleukin 11	Protein Coding	P20809	54	GC19M055364	0.292931	https://www.genecards.org/cgi-bin/carddisp.pl?gene=IL11
MPC1	Mitochondrial Pyruvate Carrier 1	Protein Coding	Q9Y5U8	54	GC06M166364	0.292931	https://www.genecards.org/cgi-bin/carddisp.pl?gene=MPC1
NFE2L1	NFE2 Like BZIP Transcription Factor 1	Protein Coding	Q14494	54	GC17P123278	0.292931	https://www.genecards.org/cgi-bin/carddisp.pl?gene=NFE2L1
RHBDF2	Rhomboid 5 Homolog 2	Protein Coding	Q6PJF5	54	GC17M076470	0.292931	https://www.genecards.org/cgi-bin/carddisp.pl?gene=RHBDF2
RREB1	Ras Responsive Element Binding Protein 1	Protein Coding	Q92766	54	GC06P007107	0.292931	https://www.genecards.org/cgi-bin/carddisp.pl?gene=RREB1
SH2B1	SH2B Adaptor Protein 1	Protein Coding	Q9NRF2	54	GC16P096578	0.292931	https://www.genecards.org/cgi-bin/carddisp.pl?gene=SH2B1
SLC44A1	Solute Carrier Family 44 Member 1	Protein Coding	Q8WWI5	54	GC09P105244	0.292931	https://www.genecards.org/cgi-bin/carddisp.pl?gene=SLC44A1
ORM1	Orosomucoid 1	Protein Coding	P02763	53	GC09P114323	0.292931	https://www.genecards.org/cgi-bin/carddisp.pl?gene=ORM1
TNFRSF12A	TNF Receptor Superfamily Member 12A	Protein Coding	Q9NP84	53	GC16P003018	0.292931	https://www.genecards.org/cgi-bin/carddisp.pl?gene=TNFRSF12A
TRA2B	Transformer 2 Beta Homolog	Protein Coding	P62995	53	GC03M185914	0.292931	https://www.genecards.org/cgi-bin/carddisp.pl?gene=TRA2B
ALMS1	ALMS1 Centrosome And Basal Body Associated Protein	Protein Coding	Q8TCU4	52	GC02P073385	0.292931	https://www.genecards.org/cgi-bin/carddisp.pl?gene=ALMS1
ESM1	Endothelial Cell Specific Molecule 1	Protein Coding	Q9NQ30	52	GC05M054977	0.292931	https://www.genecards.org/cgi-bin/carddisp.pl?gene=ESM1
FAT1	FAT Atypical Cadherin 1	Protein Coding	Q14517	52	GC04M186587	0.292931	https://www.genecards.org/cgi-bin/carddisp.pl?gene=FAT1
GPBAR1	G Protein-Coupled Bile Acid Receptor 1	Protein Coding	Q8TDU6	52	GC02P218259	0.292931	https://www.genecards.org/cgi-bin/carddisp.pl?gene=GPBAR1
MRTFA	Myocardin Related Transcription Factor A	Protein Coding	Q969V6	52	GC22M080180	0.292931	https://www.genecards.org/cgi-bin/carddisp.pl?gene=MRTFA
PPIG	Peptidylprolyl Isomerase G	Protein Coding	Q13427	52	GC02P169584	0.292931	https://www.genecards.org/cgi-bin/carddisp.pl?gene=PPIG
SERPINB3	Serpin Family B Member 3	Protein Coding	P29508	52	GC18M063655	0.292931	https://www.genecards.org/cgi-bin/carddisp.pl?gene=SERPINB3
CIDEA	Cell Death Inducing DFFA Like Effector A	Protein Coding	O60543	51	GC18P012254	0.292931	https://www.genecards.org/cgi-bin/carddisp.pl?gene=CIDEA
INSIG1	Insulin Induced Gene 1	Protein Coding	O15503	51	GC07P155297	0.292931	https://www.genecards.org/cgi-bin/carddisp.pl?gene=INSIG1
POLR2D	RNA Polymerase II Subunit D	Protein Coding	O15514	51	GC02M128629	0.292931	https://www.genecards.org/cgi-bin/carddisp.pl?gene=POLR2D
SLC23A2	Solute Carrier Family 23 Member 2	Protein Coding	Q9UGH3	51	GC20M004852	0.292931	https://www.genecards.org/cgi-bin/carddisp.pl?gene=SLC23A2
JAZF1	JAZF Zinc Finger 1	Protein Coding	Q86VZ6	50	GC07M027830	0.292931	https://www.genecards.org/cgi-bin/carddisp.pl?gene=JAZF1
SH3BP5	SH3 Domain Binding Protein 5	Protein Coding	O60239	50	GC03M026815	0.292931	https://www.genecards.org/cgi-bin/carddisp.pl?gene=SH3BP5
SLC23A1	Solute Carrier Family 23 Member 1	Protein Coding	Q9UHI7	50	GC05M139367	0.292931	https://www.genecards.org/cgi-bin/carddisp.pl?gene=SLC23A1
TP53BP2	Tumor Protein P53 Binding Protein 2	Protein Coding	Q13625	50	GC01M223779	0.292931	https://www.genecards.org/cgi-bin/carddisp.pl?gene=TP53BP2
CRELD2	Cysteine Rich With EGF Like Domains 2	Protein Coding	Q6UXH1	49	GC22P049918	0.292931	https://www.genecards.org/cgi-bin/carddisp.pl?gene=CRELD2
IFNL3	Interferon Lambda 3	Protein Coding	Q8IZI9	49	GC19M039243	0.292931	https://www.genecards.org/cgi-bin/carddisp.pl?gene=IFNL3
SLC17A9	Solute Carrier Family 17 Member 9	Protein Coding	Q9BYT1	49	GC20P062952	0.292931	https://www.genecards.org/cgi-bin/carddisp.pl?gene=SLC17A9
SUCNR1	Succinate Receptor 1	Protein Coding	Q9BXA5	49	GC03P151873	0.292931	https://www.genecards.org/cgi-bin/carddisp.pl?gene=SUCNR1
ZNF638	Zinc Finger Protein 638	Protein Coding	Q14966	49	GC02P071276	0.292931	https://www.genecards.org/cgi-bin/carddisp.pl?gene=ZNF638
IL27	Interleukin 27	Protein Coding	Q8NEV9	48	GC16M044690	0.292931	https://www.genecards.org/cgi-bin/carddisp.pl?gene=IL27
MPC2	Mitochondrial Pyruvate Carrier 2	Protein Coding	O95563	48	GC01M167916	0.292931	https://www.genecards.org/cgi-bin/carddisp.pl?gene=MPC2
PSME2	Proteasome Activator Subunit 2	Protein Coding	Q9UL46	48	GC14M024143	0.292931	https://www.genecards.org/cgi-bin/carddisp.pl?gene=PSME2
TRIM31	Tripartite Motif Containing 31	Protein Coding	Q9BZY9	48	GC06M097007	0.292931	https://www.genecards.org/cgi-bin/carddisp.pl?gene=TRIM31
DERL1	Derlin 1	Protein Coding	Q9BUN8	47	GC08M123013	0.292931	https://www.genecards.org/cgi-bin/carddisp.pl?gene=DERL1
FNDC5	Fibronectin Type III Domain Containing 5	Protein Coding	Q8NAU1	47	GC01M034014	0.292931	https://www.genecards.org/cgi-bin/carddisp.pl?gene=FNDC5
IRX3	Iroquois Homeobox 3	Protein Coding	P78415	47	GC16M054283	0.292931	https://www.genecards.org/cgi-bin/carddisp.pl?gene=IRX3
DNAJC15	DnaJ Heat Shock Protein Family (Hsp40) Member C15	Protein Coding	Q9Y5T4	46	GC13P043023	0.292931	https://www.genecards.org/cgi-bin/carddisp.pl?gene=DNAJC15
MTARC1	Mitochondrial Amidoxime Reducing Component 1	Protein Coding	Q5VT66	46	GC01P220788	0.292931	https://www.genecards.org/cgi-bin/carddisp.pl?gene=MTARC1
ARRDC3	Arrestin Domain Containing 3	Protein Coding	Q96B67	45	GC05M091368	0.292931	https://www.genecards.org/cgi-bin/carddisp.pl?gene=ARRDC3
MXD3	MAX Dimerization Protein 3	Protein Coding	Q9BW11	43	GC05M179591	0.292931	https://www.genecards.org/cgi-bin/carddisp.pl?gene=MXD3
PSD3	Pleckstrin And Sec7 Domain Containing 3	Protein Coding	Q9NYI0	43	GC08M018527	0.292931	https://www.genecards.org/cgi-bin/carddisp.pl?gene=PSD3
XPO4	Exportin 4	Protein Coding	Q9C0E2	43	GC13M020777	0.292931	https://www.genecards.org/cgi-bin/carddisp.pl?gene=XPO4
CIDEB	Cell Death Inducing DFFA Like Effector B	Protein Coding	Q9UHD4	42	GC14M024305	0.292931	https://www.genecards.org/cgi-bin/carddisp.pl?gene=CIDEB
ZNF267	Zinc Finger Protein 267	Protein Coding	Q14586	39	GC16P096821	0.292931	https://www.genecards.org/cgi-bin/carddisp.pl?gene=ZNF267
OFCC1	Orofacial Cleft 1 Candidate 1 (Pseudogene)	RNA Gene	Q8IZS5	38	GC06M009596	0.292931	https://www.genecards.org/cgi-bin/carddisp.pl?gene=OFCC1
MIR22HG	MIR22 Host Gene	RNA Gene	Q0VDD5	35	GC17M083871	0.292931	https://www.genecards.org/cgi-bin/carddisp.pl?gene=MIR22HG
NEAT1	Nuclear Paraspeckle Assembly Transcript 1	RNA Gene		34	GC11P094620	0.292931	https://www.genecards.org/cgi-bin/carddisp.pl?gene=NEAT1
TUG1	Taurine Up-Regulated 1	Protein Coding	A0A6I8PU40	34	GC22P030969	0.292931	https://www.genecards.org/cgi-bin/carddisp.pl?gene=TUG1
DANCR	Differentiation Antagonizing Non-Protein Coding RNA	RNA Gene	P0C864	32	GC04P052712	0.292931	https://www.genecards.org/cgi-bin/carddisp.pl?gene=DANCR
DLEU2	Deleted In Lymphocytic Leukemia 2	RNA Gene		31	GC13M049913	0.292931	https://www.genecards.org/cgi-bin/carddisp.pl?gene=DLEU2
HOTTIP	HOXA Distal Transcript Antisense RNA	RNA Gene		31	GC07P027198	0.292931	https://www.genecards.org/cgi-bin/carddisp.pl?gene=HOTTIP
MIR133B	MicroRNA 133b	RNA Gene		31	GC06P052148	0.292931	https://www.genecards.org/cgi-bin/carddisp.pl?gene=MIR133B
MIR185	MicroRNA 185	RNA Gene		31	GC22P075390	0.292931	https://www.genecards.org/cgi-bin/carddisp.pl?gene=MIR185
HOXA11-AS	HOXA11 Antisense RNA	RNA Gene		30	GC07P027184	0.292931	https://www.genecards.org/cgi-bin/carddisp.pl?gene=HOXA11-AS
MIR34B	MicroRNA 34b	RNA Gene		30	GC11P112584	0.292931	https://www.genecards.org/cgi-bin/carddisp.pl?gene=MIR34B
SNHG1	Small Nucleolar RNA Host Gene 1	RNA Gene		30	GC11M128866	0.292931	https://www.genecards.org/cgi-bin/carddisp.pl?gene=SNHG1
EGOT	Eosinophil Granule Ontogeny Transcript	RNA Gene		29	GC03M004740	0.292931	https://www.genecards.org/cgi-bin/carddisp.pl?gene=EGOT
MIR193A	MicroRNA 193a	RNA Gene		29	GC17P031559	0.292931	https://www.genecards.org/cgi-bin/carddisp.pl?gene=MIR193A
MIR199B	MicroRNA 199b	RNA Gene		29	GC09M128244	0.292931	https://www.genecards.org/cgi-bin/carddisp.pl?gene=MIR199B
MIR20A	MicroRNA 20a	RNA Gene		29	GC13P091699	0.292931	https://www.genecards.org/cgi-bin/carddisp.pl?gene=MIR20A
MIR216A	MicroRNA 216a	RNA Gene		29	GC02M055988	0.292931	https://www.genecards.org/cgi-bin/carddisp.pl?gene=MIR216A
MIR221	MicroRNA 221	RNA Gene		29	GC0XM045746	0.292931	https://www.genecards.org/cgi-bin/carddisp.pl?gene=MIR221
MIR222	MicroRNA 222	RNA Gene		29	GC0XM045747	0.292931	https://www.genecards.org/cgi-bin/carddisp.pl?gene=MIR222
MIR301A	MicroRNA 301a	RNA Gene		29	GC17M059151	0.292931	https://www.genecards.org/cgi-bin/carddisp.pl?gene=MIR301A
MIR302A	MicroRNA 302a	RNA Gene		29	GC04M112936	0.292931	https://www.genecards.org/cgi-bin/carddisp.pl?gene=MIR302A
MIR373	MicroRNA 373	RNA Gene		29	GC19P123654	0.292931	https://www.genecards.org/cgi-bin/carddisp.pl?gene=MIR373
RNU4ATAC	RNA, U4atac Small Nuclear	RNA Gene		29	GC02P146255	0.292931	https://www.genecards.org/cgi-bin/carddisp.pl?gene=RNU4ATAC
BCYRN1	Brain Cytoplasmic RNA 1	RNA Gene		28	GC02P047253	0.292931	https://www.genecards.org/cgi-bin/carddisp.pl?gene=BCYRN1
HNF1A-AS1	HNF1A Antisense RNA 1	RNA Gene		28	GC12M123804	0.292931	https://www.genecards.org/cgi-bin/carddisp.pl?gene=HNF1A-AS1
MIR18A	MicroRNA 18a	RNA Gene		28	GC13P091701	0.292931	https://www.genecards.org/cgi-bin/carddisp.pl?gene=MIR18A
MIR215	MicroRNA 215	RNA Gene		28	GC01M220117	0.292931	https://www.genecards.org/cgi-bin/carddisp.pl?gene=MIR215
MIR340	MicroRNA 340	RNA Gene		28	GC05M180015	0.292931	https://www.genecards.org/cgi-bin/carddisp.pl?gene=MIR340
MIR381	MicroRNA 381	RNA Gene		28	GC14P117912	0.292931	https://www.genecards.org/cgi-bin/carddisp.pl?gene=MIR381
SNHG16	Small Nucleolar RNA Host Gene 16	RNA Gene		28	GC17P123913	0.292931	https://www.genecards.org/cgi-bin/carddisp.pl?gene=SNHG16
MIR144	MicroRNA 144	RNA Gene		27	GC17M084703	0.292931	https://www.genecards.org/cgi-bin/carddisp.pl?gene=MIR144
MIR659	MicroRNA 659	RNA Gene		27	GC22M080154	0.292931	https://www.genecards.org/cgi-bin/carddisp.pl?gene=MIR659
MIR873	MicroRNA 873	RNA Gene		27	GC09M028888	0.292931	https://www.genecards.org/cgi-bin/carddisp.pl?gene=MIR873
OIP5-AS1	OIP5 Antisense RNA 1	RNA Gene		27	GC15P166116	0.292931	https://www.genecards.org/cgi-bin/carddisp.pl?gene=OIP5-AS1
SNHG6	Small Nucleolar RNA Host Gene 6	RNA Gene		27	GC08M066921	0.292931	https://www.genecards.org/cgi-bin/carddisp.pl?gene=SNHG6
CASC15	Cancer Susceptibility 15	RNA Gene		26	GC06P021686	0.292931	https://www.genecards.org/cgi-bin/carddisp.pl?gene=CASC15
LINC00324	Long Intergenic Non-Protein Coding RNA 324	RNA Gene		26	GC17M084190	0.292931	https://www.genecards.org/cgi-bin/carddisp.pl?gene=LINC00324
MIR494	MicroRNA 494	RNA Gene		26	GC14P117924	0.292931	https://www.genecards.org/cgi-bin/carddisp.pl?gene=MIR494
MIR511	MicroRNA 511	RNA Gene		25	GC10P017845	0.292931	https://www.genecards.org/cgi-bin/carddisp.pl?gene=MIR511
MIR942	MicroRNA 942	RNA Gene		25	GC01P117094	0.292931	https://www.genecards.org/cgi-bin/carddisp.pl?gene=MIR942
SNORD24	Small Nucleolar RNA, C/D Box 24	RNA Gene		25	GC09P133349	0.292931	https://www.genecards.org/cgi-bin/carddisp.pl?gene=SNORD24
MIR320E	MicroRNA 320e	RNA Gene		24	GC19M097086	0.292931	https://www.genecards.org/cgi-bin/carddisp.pl?gene=MIR320E
MIR517A	MicroRNA 517a	RNA Gene		24	GC19P053712	0.292931	https://www.genecards.org/cgi-bin/carddisp.pl?gene=MIR517A
MPC1L	Mitochondrial Pyruvate Carrier 1 Like	Protein Coding	P0DKB6	24	GC0XP040623	0.292931	https://www.genecards.org/cgi-bin/carddisp.pl?gene=MPC1L
APOC4-APOC2	APOC4-APOC2 Readthrough (NMD Candidate)	RNA Gene		22	GC19P044942	0.292931	https://www.genecards.org/cgi-bin/carddisp.pl?gene=APOC4-APOC2
PWAR1	Prader Willi/Angelman Region RNA 1	RNA Gene		22	GC15P025135	0.292931	https://www.genecards.org/cgi-bin/carddisp.pl?gene=PWAR1
SLC2A1-DT	SLC2A1 Divergent Transcript	RNA Gene		22	GC01P055197	0.292931	https://www.genecards.org/cgi-bin/carddisp.pl?gene=SLC2A1-DT
VLDLR-AS1	VLDLR Antisense RNA 1	RNA Gene		22	GC09M002386	0.292931	https://www.genecards.org/cgi-bin/carddisp.pl?gene=VLDLR-AS1
EMSLR	E2F1 MRNA Stabilizing LncRNA	RNA Gene		21	GC07P107551	0.292931	https://www.genecards.org/cgi-bin/carddisp.pl?gene=EMSLR
FIRRE	Firre Intergenic Repeating RNA Element	RNA Gene		21	GC0XM131691	0.292931	https://www.genecards.org/cgi-bin/carddisp.pl?gene=FIRRE
LOC654780	Splicing Factor Proline/Glutamine-Rich	RNA Gene		21	GC16M084193	0.292931	https://www.genecards.org/cgi-bin/carddisp.pl?gene=LOC654780
SLX1A-SULT1A3	SLX1A-SULT1A3 Readthrough (NMD Candidate)	RNA Gene		21	GC16P096698	0.292931	https://www.genecards.org/cgi-bin/carddisp.pl?gene=SLX1A-SULT1A3
TSPOAP1-AS1	TSPOAP1, SUPT4H1 And RNF43 Antisense RNA 1	RNA Gene		20	GC17P123467	0.292931	https://www.genecards.org/cgi-bin/carddisp.pl?gene=TSPOAP1-AS1
DDX11-AS1	DDX11 Antisense RNA 1	RNA Gene		19	GC12M032179	0.292931	https://www.genecards.org/cgi-bin/carddisp.pl?gene=DDX11-AS1
LINC00907	Long Intergenic Non-Protein Coding RNA 907	RNA Gene		19	GC18P042159	0.292931	https://www.genecards.org/cgi-bin/carddisp.pl?gene=LINC00907
MIR365B	MicroRNA 365b	RNA Gene		17	GC17P122597	0.292931	https://www.genecards.org/cgi-bin/carddisp.pl?gene=MIR365B
MIR5004	MicroRNA 5004	RNA Gene		17	GC06P033438	0.292931	https://www.genecards.org/cgi-bin/carddisp.pl?gene=MIR5004
MIR922	MicroRNA 922	RNA Gene		16	GC03M197674	0.292931	https://www.genecards.org/cgi-bin/carddisp.pl?gene=MIR922
PCBP2-OT1	PCBP2 Overlapping Transcript 1	RNA Gene		16	GC12P053464	0.292931	https://www.genecards.org/cgi-bin/carddisp.pl?gene=PCBP2-OT1
LINC01093	Long Intergenic Non-Protein Coding RNA 1093	RNA Gene		15	GC04M184893	0.292931	https://www.genecards.org/cgi-bin/carddisp.pl?gene=LINC01093
MIR378E	MicroRNA 378e	RNA Gene		15	GC05P170028	0.292931	https://www.genecards.org/cgi-bin/carddisp.pl?gene=MIR378E
MIR520F	MicroRNA 520f	RNA Gene		15	GC19P053682	0.292931	https://www.genecards.org/cgi-bin/carddisp.pl?gene=MIR520F
MIR4668	MicroRNA 4668	RNA Gene		14	GC09P111932	0.292931	https://www.genecards.org/cgi-bin/carddisp.pl?gene=MIR4668
DINOL	Damage Induced Long Noncoding RNA	RNA Gene		12	GC06M098115	0.292931	https://www.genecards.org/cgi-bin/carddisp.pl?gene=DINOL
ENSG00000249001	Novel Transcript	RNA Gene		11	GC04M087568	0.292931	https://www.genecards.org/cgi-bin/carddisp.pl?gene=ENSG00000249001
MIR6881	MicroRNA 6881	RNA Gene		9	GC15M074411	0.292931	https://www.genecards.org/cgi-bin/carddisp.pl?gene=MIR6881

## Sheet: OMIM
Gene Map Search - 'alcohol-asscoiated liver disease '
Downloaded:	September 13, 2024
Copyright (c) 1966-2024 Johns Hopkins University OMIM, data are provided for research purposes only.
Cytogenetic location	Genomic coordinates (From NCBI/GRCh38)	Gene/Locus	Gene/Locus name	Gene/Locus MIM number	Approved Symbol	Entrez Gene ID	Ensembl Gene ID	Comments	Phenotype	Phenotype MIM number	Inheritance	Pheno map key	Mouse Gene (from MGI)
1p36	1:1-27600000	AD7CNTP	Alzheimer disease neuronal thread protein	607413
1p36	1:1-27600000	IBD7	Inflammatory bowel disease 7	605225	IBD7	57042		associated with rs6426833	{Inflammatory bowel disease 7}	605225		2
1p36.31	1:6467122-6520092	PLEKHG5, KIAA0720, HMNR4, CMTRIC	Pleckstrin homology domain- and RhoGEF domain-containing protein G5	611101	PLEKHG5	57449	ENSG00000171680,ENST00000377728;;;ENST00000377728		Charcot-Marie-Tooth disease, recessive intermediate C	615376	AR	3	Plekhg5
1p36.31	1:6467122-6520092	PLEKHG5, KIAA0720, HMNR4, CMTRIC	Pleckstrin homology domain- and RhoGEF domain-containing protein G5	611101	PLEKHG5	57449	ENSG00000171680,ENST00000377728;;;ENST00000377728		Neuronopathy, distal hereditary motor, autosomal recessive 4	611067	AR	3	Plekhg5
1p36.23	1:7961711-7985505	DJ1, PARK7	Oncogene DJ-1	602533	PARK7	11315	ENSG00000116288,ENST00000338639;;;ENST00000338639		Parkinson disease 7, autosomal recessive early-onset	606324	AR	3	Park7
1p36.22	1:10210570-10381603	KIF1B, CMT2A, CMT2A1, NBLST1	Kinesin family member 1B	605995	KIF1B	23095	ENSG00000054523,ENST00000676179;;;ENST00000676179		{Neuroblastoma, susceptibility to, 1}	256700	AD, SMu	3	Kif1b
1p36.22	1:10210570-10381603	KIF1B, CMT2A, CMT2A1, NBLST1	Kinesin family member 1B	605995	KIF1B	23095	ENSG00000054523,ENST00000676179;;;ENST00000676179		Charcot-Marie-Tooth disease, type 2A1	118210	AD	3	Kif1b
1p36.22	1:11785723-11805964	MTHFR	Methylenetetrahydrofolate reductase	607093	MTHFR	4524	ENSG00000177000,ENST00000376590;;;ENST00000376590		{Neural tube defects, susceptibility to}	601634	AR	3	Mthfr
1p36.22	1:11785723-11805964	MTHFR	Methylenetetrahydrofolate reductase	607093	MTHFR	4524	ENSG00000177000,ENST00000376590;;;ENST00000376590		{Schizophrenia, susceptibility to}	181500	AD	3	Mthfr
1p36.22	1:11785723-11805964	MTHFR	Methylenetetrahydrofolate reductase	607093	MTHFR	4524	ENSG00000177000,ENST00000376590;;;ENST00000376590		{Thromboembolism, susceptibility to}	188050	AD	3	Mthfr
1p36.22	1:11785723-11805964	MTHFR	Methylenetetrahydrofolate reductase	607093	MTHFR	4524	ENSG00000177000,ENST00000376590;;;ENST00000376590		{Vascular disease, susceptibility to}			3	Mthfr
1p36.22	1:11785723-11805964	MTHFR	Methylenetetrahydrofolate reductase	607093	MTHFR	4524	ENSG00000177000,ENST00000376590;;;ENST00000376590		Homocystinuria due to MTHFR deficiency	236250	AR	3	Mthfr
1p36.22	1:11980444-12013508	MFN2, KIAA0214, CMT2A2A, HMSN6A, CMT2A2B, MSL	Mitofusin 2	608507	MFN2	9927	ENSG00000116688,ENST00000235329;;;ENST00000235329		Charcot-Marie-Tooth disease, axonal, type 2A2A	609260	AD	3	Mfn2
1p36.22	1:11980444-12013508	MFN2, KIAA0214, CMT2A2A, HMSN6A, CMT2A2B, MSL	Mitofusin 2	608507	MFN2	9927	ENSG00000116688,ENST00000235329;;;ENST00000235329		Charcot-Marie-Tooth disease, axonal, type 2A2B	617087	AR	3	Mfn2
1p36.22	1:11980444-12013508	MFN2, KIAA0214, CMT2A2A, HMSN6A, CMT2A2B, MSL	Mitofusin 2	608507	MFN2	9927	ENSG00000116688,ENST00000235329;;;ENST00000235329		Hereditary motor and sensory neuropathy VIA	601152	AD	3	Mfn2
1p36.22	1:11980444-12013508	MFN2, KIAA0214, CMT2A2A, HMSN6A, CMT2A2B, MSL	Mitofusin 2	608507	MFN2	9927	ENSG00000116688,ENST00000235329;;;ENST00000235329		Lipomatosis, multiple symmetric, with or without peripheral neuropathy	151800	AR	3	Mfn2
1p36.21	1:12500001-15900000	GBD2	Gallbladder disease 2	609918	GBD2	100048905		between D1S1597 and D1S47	Gallbladder disease 2	609918		2
1p36.12	1:20633458-20651511	PINK1, PARK6	PTEN-induced putative kinase 1	608309	PINK1	65018	ENSG00000158828,ENST00000321556;;;ENST00000321556		Parkinson disease 6, early onset	605909	AR	3	Pink1
1p36.12	1:21217250-21345504	ECE1	Endothelin converting enzyme 1	600423	ECE1	1889	ENSG00000117298,ENST00000374893;;;ENST00000374893	mutation identified in 1 HCAD patient	?Hirschsprung disease, cardiac defects, and autonomic dysfunction	613870	AD	3	Ece1
1p36.12	1:21217250-21345504	ECE1	Endothelin converting enzyme 1	600423	ECE1	1889	ENSG00000117298,ENST00000374893;;;ENST00000374893	mutation identified in 1 HCAD patient	{Hypertension, essential, susceptibility to}	145500	Mu	3	Ece1
1p36.12	1:21508984-21578410	ALPL, HOPS, TNSALP, HPPA, HPPO, HPPI, HPPC	Alkaline phosphatase, liver/bone/kidney	171760	ALPL	249	ENSG00000162551,ENST00000374840;;;ENST00000374840		Hypophosphatasia, adult	146300	AD, AR	3	Alpl
1p36.12	1:21508984-21578410	ALPL, HOPS, TNSALP, HPPA, HPPO, HPPI, HPPC	Alkaline phosphatase, liver/bone/kidney	171760	ALPL	249	ENSG00000162551,ENST00000374840;;;ENST00000374840		Hypophosphatasia, childhood	241510	AR	3	Alpl
1p36.12	1:21508984-21578410	ALPL, HOPS, TNSALP, HPPA, HPPO, HPPI, HPPC	Alkaline phosphatase, liver/bone/kidney	171760	ALPL	249	ENSG00000162551,ENST00000374840;;;ENST00000374840		Hypophosphatasia, infantile	241500	AR	3	Alpl
1p36.12	1:21508984-21578410	ALPL, HOPS, TNSALP, HPPA, HPPO, HPPI, HPPC	Alkaline phosphatase, liver/bone/kidney	171760	ALPL	249	ENSG00000162551,ENST00000374840;;;ENST00000374840		Odontohypophosphatasia	146300	AD, AR	3	Alpl
1p36.11	1:25272486-25330445	RHD, HDFNRH	Rhesus system D polypeptide	111680	RHD	6007	ENSG00000187010,ENST00000328664;;;ENST00000328664		[Blood group, RH system]	111690		3	Rhd
1p36.11	1:25272486-25330445	RHD, HDFNRH	Rhesus system D polypeptide	111680	RHD	6007	ENSG00000187010,ENST00000328664;;;ENST00000328664		{Hemolytic disease of fetus and newborn, RH-induced}	619462	IC	3	Rhd
1p36.11	1:25362249-25430203	RHCE, RHNA	Rhesus system C and E polypeptides	111700	RHCE	6006	ENSG00000188672,ENST00000294413;;;ENST00000294413		Rh-null disease, amorph type	617970	AR	3	Rhd
1p35.1	1:32775239-32817358	YARS1, YARS, CMTDIC, TYRRS, YTS, YRS, IMNEPD2	Tyrosyl-tRNA synthetase 1	603623	YARS1	8565	ENSG00000134684,ENST00000373477;;;ENST00000373477		Charcot-Marie-Tooth disease, dominant intermediate C	608323	AD	3	Yars1
1p35.1	1:32775239-32817358	YARS1, YARS, CMTDIC, TYRRS, YTS, YRS, IMNEPD2	Tyrosyl-tRNA synthetase 1	603623	YARS1	8565	ENSG00000134684,ENST00000373477;;;ENST00000373477		Infantile-onset multisystem neurologic, endocrine, and pancreatic disease 2	619418	AR	3	Yars1
1p34.3	1:34300001-39600000	GBD3	Gallbladder disease 3	609919	GBD3	100048906		new D2S255	Gallbladder disease 3	609919		2
1p34.1	1:44404783-44651724	RNF220, HLD23	RING finger protein 220	616136	RNF220	55182	ENSG00000187147,ENST00000361799;;;ENST00000361799		Leukodystrophy, hypomyelinating, 23, with ataxia, deafness, liver dysfunction, and dilated cardiomyopathy	619688	AR	3	Rnf220
1p32	1:50200001-60800000	PARK10, AAOPD	Parkinson disease 10	606852	PARK10	170534		max lod at D1S2652; ?associated with CDCP2	{Parkinson disease 10}	606852		2
1p31	1:60800001-84400000	PAOD1	Peripheral arterial occlusive disease 1	606787	PAOD1	171513			Peripheral arterial occlusive disease 1	606787		2
1p31.3	1:63322567-63325128	FOXD3, AIS1, VAMAS2	Forkhead box D3	611539	FOXD3	27022	ENSG00000187140,ENST00000371116;;;ENST00000371116		{Autoimmune disease, susceptibility to, 1}	607836	AD	3	Foxd3
1p31.3	1:65264749-65415871	DNAJC6, DJC6, KIAA0473, PARK19	DNAJ heat shock protein family (Hsp40) member C6	608375	DNAJC6	9829	ENSG00000116675,ENST00000371069;;;ENST00000371069		Parkinson disease 19a, juvenile-onset	615528	AR	3	Dnajc6
1p31.3	1:65264749-65415871	DNAJC6, DJC6, KIAA0473, PARK19	DNAJ heat shock protein family (Hsp40) member C6	608375	DNAJC6	9829	ENSG00000116675,ENST00000371069;;;ENST00000371069		Parkinson disease 19b, early-onset	615528	AR	3	Dnajc6
1p31.3	1:67138637-67265903	IL23R, IBD17	Interleukin 23 receptor	607562	IL23R	149233	ENSG00000162594,ENST00000347310;;;ENST00000347310		{Inflammatory bowel disease 17, protection against}	612261		3	Il23r
1p31.3	1:67138637-67265903	IL23R, IBD17	Interleukin 23 receptor	607562	IL23R	149233	ENSG00000162594,ENST00000347310;;;ENST00000347310		{Psoriasis, protection against}	605606		3	Il23r
1p31.1	1:74235387-74544428	TNNI3K, CCDD	TNNI3-interacting kinase	613932	TNNI3K	51086	ENSG00000116783,ENST00000326637;;;ENST00000326637		Cardiac conduction disease with or without dilated cardiomyopathy	616117	AD	3	Tnni3k
1p22.1	1:93992834-94121148	ABCA4, ABCR, STGD1, FFM, RP19, CORD3, ARMD2	ATP-binding transporter, retina-specific	601691	ABCA4	24	ENSG00000198691,ENST00000370225;;;ENST00000370225		{Macular degeneration, age-related, 2}	153800	AD	3	Abca4
1p22.1	1:93992834-94121148	ABCA4, ABCR, STGD1, FFM, RP19, CORD3, ARMD2	ATP-binding transporter, retina-specific	601691	ABCA4	24	ENSG00000198691,ENST00000370225;;;ENST00000370225		Cone-rod dystrophy 3	604116	AR	3	Abca4
1p22.1	1:93992834-94121148	ABCA4, ABCR, STGD1, FFM, RP19, CORD3, ARMD2	ATP-binding transporter, retina-specific	601691	ABCA4	24	ENSG00000198691,ENST00000370225;;;ENST00000370225		Fundus flavimaculatus	248200	AR	3	Abca4
1p22.1	1:93992834-94121148	ABCA4, ABCR, STGD1, FFM, RP19, CORD3, ARMD2	ATP-binding transporter, retina-specific	601691	ABCA4	24	ENSG00000198691,ENST00000370225;;;ENST00000370225		Retinal dystrophy, early-onset severe	248200	AR	3	Abca4
1p22.1	1:93992834-94121148	ABCA4, ABCR, STGD1, FFM, RP19, CORD3, ARMD2	ATP-binding transporter, retina-specific	601691	ABCA4	24	ENSG00000198691,ENST00000370225;;;ENST00000370225		Retinitis pigmentosa 19	601718	AR	3	Abca4
1p22.1	1:93992834-94121148	ABCA4, ABCR, STGD1, FFM, RP19, CORD3, ARMD2	ATP-binding transporter, retina-specific	601691	ABCA4	24	ENSG00000198691,ENST00000370225;;;ENST00000370225		Stargardt disease 1	248200	AR	3	Abca4
1p21.2	1:99849258-99924023	AGL, GDE	Amylo-1,6-glucosidase, 4-alpha-glucanotransferase (glycogen debranching enzyme)	610860	AGL	178	ENSG00000162688,ENST00000361915;;;ENST00000361915		Glycogen storage disease IIIa	232400	AR	3	Agl
1p21.2	1:99849258-99924023	AGL, GDE	Amylo-1,6-glucosidase, 4-alpha-glucanotransferase (glycogen debranching enzyme)	610860	AGL	178	ENSG00000162688,ENST00000361915;;;ENST00000361915		Glycogen storage disease IIIb	232400	AR	3	Agl
1p21.2	1:100186919-100249834	DBT, BCATE2, MSUD2	Dihydrolipoamide branched chain transacylase (E2 component of branched chain keto acid dehydrogenase complex)	248610	DBT	1629	ENSG00000137992,ENST00000370132;;;ENST00000370132	pseudogene on 3q24	Maple syrup urine disease, type II	620699	AR	3	Dbt
1p13.1	1:116373244-116404774	ATP1A1, CMT2DD, HOMGSMR2	ATPase, Na+K+ transporting, alpha-1 polypeptide	182310	ATP1A1	476	ENSG00000163399,ENST00000295598;;;ENST00000295598		Charcot-Marie-Tooth disease, axonal, type 2DD	618036	AD	3	Atp1a1
1p13.1	1:116373244-116404774	ATP1A1, CMT2DD, HOMGSMR2	ATPase, Na+K+ transporting, alpha-1 polypeptide	182310	ATP1A1	476	ENSG00000163399,ENST00000295598;;;ENST00000295598		Hypomagnesemia, seizures, and impaired intellectual development 2	618314	AD	3	Atp1a1
1q21	1:143200001-155100000	AD13	Alzheimer disease-13	611152	AD13	100188837		max lod D1S498	{Alzheimer disease-13}	611152		2
1q21.1	1:143200001-147500000	NBLST6	Neuroblastoma, susceptibility to, 6	613017	NBLST6	100306939		?contiguous gene deletion or duplication disease	{Neuroblastoma, susceptibility to, 6}	613017		2
1q21.2	1:149390621-149471833	NOTCH2NLC, NIID, ETM6, OPDM3	NOTCH2 N-terminal-like protein C	618025	NOTCH2NLC	100996717	ENSG00000286219,ENST00000650865;;;ENST00000650865		Neuronal intranuclear inclusion disease	603472	AD	3
1q21.2	1:149390621-149471833	NOTCH2NLC, NIID, ETM6, OPDM3	NOTCH2 N-terminal-like protein C	618025	NOTCH2NLC	100996717	ENSG00000286219,ENST00000650865;;;ENST00000650865		Oculopharyngodistal myopathy 3	619473	AD	3
1q21.2	1:149390621-149471833	NOTCH2NLC, NIID, ETM6, OPDM3	NOTCH2 N-terminal-like protein C	618025	NOTCH2NLC	100996717	ENSG00000286219,ENST00000650865;;;ENST00000650865		Tremor, hereditary essential, 6	618866	AD	3
1q21.2	1:150508109-150513789	ECM1, URBWD	Extracellular matrix protein-1	602201	ECM1	1893	ENSG00000143369,ENST00000369047;;;ENST00000369047		Urbach-Wiethe disease	247100	AR	3	Ecm1
1q21.3	1:151281522-151292176	ZNF687, KIAA1441, PDB6	Zinc finger protein 687	610568	ZNF687	57592	ENSG00000143373,ENST00000336715;;;ENST00000336715	fused with AML1 in t(1;21)	Paget disease of bone 6	616833	AD	3	Zfp687
1q22	1:155185824-155192915	MUC1, PUM, ADTKD2	Mucin 1, cell surface associated	158340	MUC1	4582	ENSG00000185499,ENST00000368392	5cM proximal to SPTA1	Tubulointerstitial kidney disease, autosomal dominant, 2	174000	AD	3	Muc1
1q22	1:155234452-155244627	GBA	Glucosidase, acid beta	606463	GBA1	2629	ENSG00000177628,ENST00000368373;;;ENST00000368373	pseudogene GBAP ~16kb 3' to GBA	{Lewy body dementia, susceptibility to}	127750	AD	3	Gba1
1q22	1:155234452-155244627	GBA	Glucosidase, acid beta	606463	GBA1	2629	ENSG00000177628,ENST00000368373;;;ENST00000368373	pseudogene GBAP ~16kb 3' to GBA	{Parkinson disease, late-onset, susceptibility to}	168600	AD, Mu	3	Gba1
1q22	1:155234452-155244627	GBA	Glucosidase, acid beta	606463	GBA1	2629	ENSG00000177628,ENST00000368373;;;ENST00000368373	pseudogene GBAP ~16kb 3' to GBA	Gaucher disease, perinatal lethal	608013	AR	3	Gba1
1q22	1:155234452-155244627	GBA	Glucosidase, acid beta	606463	GBA1	2629	ENSG00000177628,ENST00000368373;;;ENST00000368373	pseudogene GBAP ~16kb 3' to GBA	Gaucher disease, type I	230800	AR	3	Gba1
1q22	1:155234452-155244627	GBA	Glucosidase, acid beta	606463	GBA1	2629	ENSG00000177628,ENST00000368373;;;ENST00000368373	pseudogene GBAP ~16kb 3' to GBA	Gaucher disease, type II	230900	AR	3	Gba1
1q22	1:155234452-155244627	GBA	Glucosidase, acid beta	606463	GBA1	2629	ENSG00000177628,ENST00000368373;;;ENST00000368373	pseudogene GBAP ~16kb 3' to GBA	Gaucher disease, type III	231000	AR	3	Gba1
1q22	1:155234452-155244627	GBA	Glucosidase, acid beta	606463	GBA1	2629	ENSG00000177628,ENST00000368373;;;ENST00000368373	pseudogene GBAP ~16kb 3' to GBA	Gaucher disease, type IIIC	231005	AR	3	Gba1
1q22	1:155289293-155308654	PKLR, PK1	Pyruvate kinase, liver and RBC type	609712	PKLR	5313	ENSG00000143627,ENST00000342741;;;ENST00000342741		Adenosine triphosphate, elevated, of erythrocytes	102900	AD	3	Pklr
1q22	1:155289293-155308654	PKLR, PK1	Pyruvate kinase, liver and RBC type	609712	PKLR	5313	ENSG00000143627,ENST00000342741;;;ENST00000342741		Pyruvate kinase deficiency	266200	AR	3	Pklr
1q22	1:156082573-156140081	LMNA, LMN1, EMD2, FPLD2, CMD1A, HGPS	Lamin A/C	150330	LMNA	4000	ENSG00000160789,ENST00000368300;;;ENST00000368300		Cardiomyopathy, dilated, 1A	115200	AD	3	Lmna
1q22	1:156082573-156140081	LMNA, LMN1, EMD2, FPLD2, CMD1A, HGPS	Lamin A/C	150330	LMNA	4000	ENSG00000160789,ENST00000368300;;;ENST00000368300		Charcot-Marie-Tooth disease, type 2B1	605588	AR	3	Lmna
1q22	1:156082573-156140081	LMNA, LMN1, EMD2, FPLD2, CMD1A, HGPS	Lamin A/C	150330	LMNA	4000	ENSG00000160789,ENST00000368300;;;ENST00000368300		Emery-Dreifuss muscular dystrophy 2, autosomal dominant	181350	AD	3	Lmna
1q22	1:156082573-156140081	LMNA, LMN1, EMD2, FPLD2, CMD1A, HGPS	Lamin A/C	150330	LMNA	4000	ENSG00000160789,ENST00000368300;;;ENST00000368300		Emery-Dreifuss muscular dystrophy 3, autosomal recessive	616516	AR	3	Lmna
1q22	1:156082573-156140081	LMNA, LMN1, EMD2, FPLD2, CMD1A, HGPS	Lamin A/C	150330	LMNA	4000	ENSG00000160789,ENST00000368300;;;ENST00000368300		Heart-hand syndrome, Slovenian type	610140	AD	3	Lmna
1q22	1:156082573-156140081	LMNA, LMN1, EMD2, FPLD2, CMD1A, HGPS	Lamin A/C	150330	LMNA	4000	ENSG00000160789,ENST00000368300;;;ENST00000368300		Hutchinson-Gilford progeria	176670	AD	3	Lmna
1q22	1:156082573-156140081	LMNA, LMN1, EMD2, FPLD2, CMD1A, HGPS	Lamin A/C	150330	LMNA	4000	ENSG00000160789,ENST00000368300;;;ENST00000368300		Lipodystrophy, familial partial, type 2	151660	AD	3	Lmna
1q22	1:156082573-156140081	LMNA, LMN1, EMD2, FPLD2, CMD1A, HGPS	Lamin A/C	150330	LMNA	4000	ENSG00000160789,ENST00000368300;;;ENST00000368300		Malouf syndrome	212112	AD	3	Lmna
1q22	1:156082573-156140081	LMNA, LMN1, EMD2, FPLD2, CMD1A, HGPS	Lamin A/C	150330	LMNA	4000	ENSG00000160789,ENST00000368300;;;ENST00000368300		Mandibuloacral dysplasia	248370	AR	3	Lmna
1q22	1:156082573-156140081	LMNA, LMN1, EMD2, FPLD2, CMD1A, HGPS	Lamin A/C	150330	LMNA	4000	ENSG00000160789,ENST00000368300;;;ENST00000368300		Muscular dystrophy, congenital	613205	AD	3	Lmna
1q22	1:156082573-156140081	LMNA, LMN1, EMD2, FPLD2, CMD1A, HGPS	Lamin A/C	150330	LMNA	4000	ENSG00000160789,ENST00000368300;;;ENST00000368300		Restrictive dermopathy 2	619793	AD	3	Lmna
1q23.2	1:159171615-159203313	CADM3, IGSF4B, TSLL1, NECL1, SYNCAM3, CMT2FF	Cell adhesion molecule 3	609743	CADM3	57863	ENSG00000162706,ENST00000368125;;;ENST00000368125		Charcot-Marie-Tooth disease, axonal, type 2FF	619519	AD	3	Cadm3
1q23.2	1:160288594-160343250	COPA, AILJK	Coatomer protein complex, subunit alpha	601924	COPA	1314	ENSG00000122218,ENST00000241704;;;ENST00000241704		{Autoimmune interstitial lung, joint, and kidney disease}	616414	AD	3	Copa
1q23.3	1:161303600-161309968	MPZ, CMT1B, CMTDID, DSS, CHN2	Myelin protein zero	159440	MPZ	4359	ENSG00000158887,ENST00000533357;;;ENST00000533357		Charcot-Marie-Tooth disease, dominant intermediate D	607791	AD	3	Mpz
1q23.3	1:161303600-161309968	MPZ, CMT1B, CMTDID, DSS, CHN2	Myelin protein zero	159440	MPZ	4359	ENSG00000158887,ENST00000533357;;;ENST00000533357		Charcot-Marie-Tooth disease, type 1B	118200	AD	3	Mpz
1q23.3	1:161303600-161309968	MPZ, CMT1B, CMTDID, DSS, CHN2	Myelin protein zero	159440	MPZ	4359	ENSG00000158887,ENST00000533357;;;ENST00000533357		Charcot-Marie-Tooth disease, type 2I	607677	AD	3	Mpz
1q23.3	1:161303600-161309968	MPZ, CMT1B, CMTDID, DSS, CHN2	Myelin protein zero	159440	MPZ	4359	ENSG00000158887,ENST00000533357;;;ENST00000533357		Charcot-Marie-Tooth disease, type 2J	607736	AD	3	Mpz
1q23.3	1:161303600-161309968	MPZ, CMT1B, CMTDID, DSS, CHN2	Myelin protein zero	159440	MPZ	4359	ENSG00000158887,ENST00000533357;;;ENST00000533357		Dejerine-Sottas disease	145900	AD, AR	3	Mpz
1q23.3	1:161303600-161309968	MPZ, CMT1B, CMTDID, DSS, CHN2	Myelin protein zero	159440	MPZ	4359	ENSG00000158887,ENST00000533357;;;ENST00000533357		Hypomyelinating neuropathy, congenital, 2	618184	AD	3	Mpz
1q23.3	1:161303600-161309968	MPZ, CMT1B, CMTDID, DSS, CHN2	Myelin protein zero	159440	MPZ	4359	ENSG00000158887,ENST00000533357;;;ENST00000533357		Roussy-Levy syndrome	180800	AD	3	Mpz
1q24.3	1:171248494-171285978	FMO1	Flavin-containing monooxygenase 1, fetal liver	136130	FMO1	2326	ENSG00000010932,ENST00000617670;;;ENST00000617670					Fmo1
1q24.3	1:171314183-171342084	FMO4	Flavin-containing monooxygenase 2, adult liver	136131	FMO4	2329	ENSG00000076258,ENST00000367749;;;ENST00000367749					Fmo4
1q25	1:173000001-185800000	AD14	Alzheimer disease 14	611154	AD14	100188754		max lod at D1S218	{Alzheimer disease-14}	611154		2
1q25.3	1:183555562-183601849	NCF2	Neutrophil cytosolic factor-2, 65kD	608515	NCF2	4688	ENSG00000116701,ENST00000367535;;;ENST00000367535		Chronic granulomatous disease 2, autosomal recessive	233710	AR	3	Ncf2
1q31	1:185800001-198700000	CELIAC7	Celiac disease, susceptibility to, 7	612005	CELIAC7	100301522		associated with rs2816316	{Celiac disease, susceptibility to, 7}	612005		2
1q32.1	1:198700001-207100000	IBD23	Inflammatory bowel disease 23	612381	IBD23	100240733		associated with rs3024505	{Inflammatory bowel disease 23}	612381		2
1q32	1:198700001-214400000	PARK16	Parkinson disease 16	613164	PARK16	100359403		associated with rs823128	{Parkinson disease 16}	613164		2
1q32.1	1:200891531-200915742	INAVA, C1orf106, IBD29	Innate immunity activator	618051	INAVA	55765	ENSG00000163362,ENST00000413687;;;ENST00000413687		{Inflammatory bowel disease 29}	618077	AD	3	Inava
1q32.1	1:204154819-204166337	REN, RTD, ADTKD4	Renin	179820	REN	5972	ENSG00000143839,ENST00000272190;;;ENST00000272190	~24cM distal to AT3	[Hyperproreninemia]			3	Ren1,Ren2
1q32.1	1:204154819-204166337	REN, RTD, ADTKD4	Renin	179820	REN	5972	ENSG00000143839,ENST00000272190;;;ENST00000272190	~24cM distal to AT3	Renal tubular dysgenesis	267430	AR	3	Ren1,Ren2
1q32.1	1:204154819-204166337	REN, RTD, ADTKD4	Renin	179820	REN	5972	ENSG00000143839,ENST00000272190;;;ENST00000272190	~24cM distal to AT3	Tubulointerstitial kidney disease, autosomal dominant, 4	613092	AD	3	Ren1,Ren2
1q32.1	1:206767602-206772494	IL10, CSIF, GVHDS	Interleukin-10	124092	IL10	3586	ENSG00000136634,ENST00000423557;;;ENST00000423557		{Graft-versus-host disease, protection against}	614395		3	Il10
1q32.1	1:206767602-206772494	IL10, CSIF, GVHDS	Interleukin-10	124092	IL10	3586	ENSG00000136634,ENST00000423557;;;ENST00000423557		{HIV-1, susceptibility to}	609423		3	Il10
1q32.1	1:206767602-206772494	IL10, CSIF, GVHDS	Interleukin-10	124092	IL10	3586	ENSG00000136634,ENST00000423557;;;ENST00000423557		{Rheumatoid arthritis, progression of}	180300		3	Il10
1q41	1:214400001-223900000	RMD1	Rippling muscle disease 1	600332	RMD1	6022			Rippling muscle disease-1	600332	AD	2
1q41	1:223109404-223143248	TLR5, TIL3, SLEB1, MELIOS	Toll-like receptor-5	603031	TLR5	7100	ENSG00000187554,ENST00000642603;;;ENST00000642603		{Legionnaire disease, susceptibility to}	608556		3	Tlr5
1q41	1:223109404-223143248	TLR5, TIL3, SLEB1, MELIOS	Toll-like receptor-5	603031	TLR5	7100	ENSG00000187554,ENST00000642603;;;ENST00000642603		{Melioidosis, susceptibility to}	615557	AD	3	Tlr5
1q41	1:223109404-223143248	TLR5, TIL3, SLEB1, MELIOS	Toll-like receptor-5	603031	TLR5	7100	ENSG00000187554,ENST00000642603;;;ENST00000642603		{Systemic lupus erythematosus, resistance to}	601744		3	Tlr5
1q41	1:223109404-223143248	TLR5, TIL3, SLEB1, MELIOS	Toll-like receptor-5	603031	TLR5	7100	ENSG00000187554,ENST00000642603;;;ENST00000642603		{Systemic lupus erythematosus, susceptibility to, 1}	601744		3	Tlr5
1q42.13	1:226870616-226903668	PSEN2, AD4, STM2, CMD1V	Presenilin 2	600759	PSEN2	5664	ENSG00000143801,ENST00000366783;;;ENST00000366783		Alzheimer disease-4	606889	AD	3	Psen2
1q42.13	1:226870616-226903668	PSEN2, AD4, STM2, CMD1V	Presenilin 2	600759	PSEN2	5664	ENSG00000143801,ENST00000366783;;;ENST00000366783		Cardiomyopathy, dilated, 1V	613697	AD	3	Psen2
2p25.1	2:9488486-9555830	ADAM17, TACE, NISBD1	ADAM metallopeptidase domain 17	603639	ADAM17	6868	ENSG00000151694,ENST00000310823;;;ENST00000310823	mutation identified in 1 NISBD1 family	?Inflammatory skin and bowel disease, neonatal, 1	614328	AR	3	Adam17
2p24.3	2:14778909-15561334	NBAS, NAG, SOPH, ILFS2	NBAS subunit of NRZ tethering complex	608025	NBAS	51594	ENSG00000151779,ENST00000281513;;;ENST00000281513		Infantile liver failure syndrome 2	616483	AR	3	Nbas
2p24.3	2:14778909-15561334	NBAS, NAG, SOPH, ILFS2	NBAS subunit of NRZ tethering complex	608025	NBAS	51594	ENSG00000151779,ENST00000281513;;;ENST00000281513		Short stature, optic nerve atrophy, and Pelger-Huet anomaly	614800	AR	3	Nbas
2p24.1	2:21001429-21044073	APOB, FLDB, LDLCQ4, FCHL2	Apolipoprotein B (including Ag(x) antigen)	107730	APOB	338	ENSG00000084674,ENST00000233242;;;ENST00000233242	1 gene for liver apo-B100 and gut apo-B48; Ag linked	Hypercholesterolemia, familial, 2	144010	AD	3	Apob
2p24.1	2:21001429-21044073	APOB, FLDB, LDLCQ4, FCHL2	Apolipoprotein B (including Ag(x) antigen)	107730	APOB	338	ENSG00000084674,ENST00000233242;;;ENST00000233242	1 gene for liver apo-B100 and gut apo-B48; Ag linked	Hypobetalipoproteinemia	615558	AR	3	Apob
2p23.3	2:26190635-26244632	HADHA, MTPA	Hydroxyacyl-Coenzyme A dehydrogenase/3-ketoacyl-Coenzyme A thiolase/ enoyl-Coenzyme A hydratase (trifunctional protein), alpha subunit	600890	HADHA	3030	ENSG00000084754,ENST00000380649;;;ENST00000380649		Fatty liver, acute, of pregnancy	609016	AR	3	Hadha
2p23.3	2:26190635-26244632	HADHA, MTPA	Hydroxyacyl-Coenzyme A dehydrogenase/3-ketoacyl-Coenzyme A thiolase/ enoyl-Coenzyme A hydratase (trifunctional protein), alpha subunit	600890	HADHA	3030	ENSG00000084754,ENST00000380649;;;ENST00000380649		HELLP syndrome, maternal, of pregnancy	609016	AR	3	Hadha
2p23.3	2:26190635-26244632	HADHA, MTPA	Hydroxyacyl-Coenzyme A dehydrogenase/3-ketoacyl-Coenzyme A thiolase/ enoyl-Coenzyme A hydratase (trifunctional protein), alpha subunit	600890	HADHA	3030	ENSG00000084754,ENST00000380649;;;ENST00000380649		LCHAD deficiency	609016	AR	3	Hadha
2p23.3	2:26190635-26244632	HADHA, MTPA	Hydroxyacyl-Coenzyme A dehydrogenase/3-ketoacyl-Coenzyme A thiolase/ enoyl-Coenzyme A hydratase (trifunctional protein), alpha subunit	600890	HADHA	3030	ENSG00000084754,ENST00000380649;;;ENST00000380649		Mitochondrial trifunctional protein deficiency 1	609015	AR	3	Hadha
2p23.3	2:27309492-27323097	MPV17, MTDPS6, CMT2EE	Mitochondrial inner membrane protein MPV17	137960	MPV17	4358	ENSG00000115204,ENST00000380044;;;ENST00000380044		Charcot-Marie-Tooth disease, axonal, type 2EE	618400	AR	3	Mpv17
2p23.3	2:27309492-27323097	MPV17, MTDPS6, CMT2EE	Mitochondrial inner membrane protein MPV17	137960	MPV17	4358	ENSG00000115204,ENST00000380044;;;ENST00000380044		Mitochondrial DNA depletion syndrome 6 (hepatocerebral type)	256810	AR	3	Mpv17
2p21	2:43838971-43882988	ABCG8, GBD4, STSL1	ATP-binding cassette, subfamily G, member 8	605460	ABCG8	64241	ENSG00000143921,ENST00000272286;;;ENST00000272286		{Gallbladder disease 4}	611465		3	Abcg8
2p21	2:43838971-43882988	ABCG8, GBD4, STSL1	ATP-binding cassette, subfamily G, member 8	605460	ABCG8	64241	ENSG00000143921,ENST00000272286;;;ENST00000272286		Sitosterolemia 1	210250	AR	3	Abcg8
2p13	2:68400001-74800000	PARK3	Parkinson disease 3	602404	PARK3	5072			{Parkinson disease 3}	602404		2
2p13.1	2:74529405-74533556	HTRA2, OMI, PARK13, PRSS25, MGCA8	HTRA serine peptidase 2	606441	HTRA2	27429	ENSG00000115317,ENST00000258080;;;ENST00000258080		{Parkinson disease 13}	610297		3	Htra2
2p13.1	2:74529405-74533556	HTRA2, OMI, PARK13, PRSS25, MGCA8	HTRA serine peptidase 2	606441	HTRA2	27429	ENSG00000115317,ENST00000258080;;;ENST00000258080		3-methylglutaconic aciduria, type VIII	617248	AR	3	Htra2
2p11.2	2:88122982-88128062	FABP1	Fatty acid-binding protein, liver	134650	FABP1	2168	ENSG00000163586,ENST00000295834;;;ENST00000295834					Fabp1
2q11-q12	2:93900001-108700000	CELIAC8	Celiac disease, susceptibility to, 8	612006	CELIAC8	100188870		associated with rs917997 and rs13015714	{Celiac disease, susceptibility to, 8}	612006		2
2q	2:93900001-242193529	COPD	Pulmonary disease, chronic obstructive, severe early-onset	606963	COPD	260431		?SERPINE2	Pulmonary disease, chronic obstructive, severe early-onset	606963		2
2q11.2	2:97713576-97756364	ZAP70, SRK, ADMIO2, IMD48	Zeta-chain associated protein kinase, 70kD (syk-related tyrosine kinase)	176947	ZAP70	7535	ENSG00000115085,ENST00000264972;;;ENST00000264972		Autoimmune disease, multisystem, infantile-onset, 2	617006	AR	3	Zap70
2q11.2	2:97713576-97756364	ZAP70, SRK, ADMIO2, IMD48	Zeta-chain associated protein kinase, 70kD (syk-related tyrosine kinase)	176947	ZAP70	7535	ENSG00000115085,ENST00000264972;;;ENST00000264972		Immunodeficiency 48	269840	AR	3	Zap70
2q14-q21	2:112200001-136100000	LCO	Liver cancer oncogene	165320
2q14.1	2:112911165-112918882	IL37, IL1F7, FIL1Z, IL1H4, IL1RP1, IBD31	Interleukin 37	605510	IL37	27178	ENSG00000125571,ENST00000263326;;;ENST00000263326	mutation identified in 1 IBD31 patient	?Inflammatory bowel disease (infantile ulcerative colitis) 31	619398	AR	3
2q21.1-q22	2:129100001-147900000	CHDS2	Coronary heart disease, susceptibility to, 2	608316	CHDS2	387584			{Coronary heart disease, susceptibility to, 2}	608316		2
2q31.1	2:176116778-176119937	HOXD10, HOX4D	Homeobox D10	142984	HOXD10	3236	ENSG00000128710,ENST00000249501;;;ENST00000249501		Charcot-Marie-Tooth disease, foot deformity of	192950	AD	3	Hoxd10
2q31.1	2:176116778-176119937	HOXD10, HOX4D	Homeobox D10	142984	HOXD10	3236	ENSG00000128710,ENST00000249501;;;ENST00000249501		Vertical talus, congenital	192950	AD	3	Hoxd10
2q31.2	2:177623244-178108339	PDE11A, PDE11A1, PDE11A2, PDE11A3, PPNAD2	Phosphodiesterase 11A	604961	PDE11A	50940	ENSG00000128655,ENST00000286063;;;ENST00000286063		Pigmented nodular adrenocortical disease, primary, 2	610475	AD	3	Pde11a
2q33.1-q33.2	2:202376327-202567749	BMPR2, PPH1, POVD1	Bone morphogenetic receptor, type II	600799	BMPR2	659	ENSG00000204217,ENST00000374580;;;ENST00000374580		Pulmonary hypertension, familial primary, 1, with or without HHT	178600	AD	3	Bmpr2
2q33.1-q33.2	2:202376327-202567749	BMPR2, PPH1, POVD1	Bone morphogenetic receptor, type II	600799	BMPR2	659	ENSG00000204217,ENST00000374580;;;ENST00000374580		Pulmonary hypertension, primary, fenfluramine or dexfenfluramine-associated	178600	AD	3	Bmpr2
2q33.1-q33.2	2:202376327-202567749	BMPR2, PPH1, POVD1	Bone morphogenetic receptor, type II	600799	BMPR2	659	ENSG00000204217,ENST00000374580;;;ENST00000374580		Pulmonary venoocclusive disease 1	265450	AD	3	Bmpr2
2q33.2	2:203867771-203873965	CTLA4, IDDM12, CELIAC3, ALPS5	Cytotoxic T-lymphocyte-associated serine esterase-4	123890	CTLA4	1493	ENSG00000163599,ENST00000648405;;;ENST00000648405		{Celiac disease, susceptibility to, 3}	609755		3	Ctla4
2q33.2	2:203867771-203873965	CTLA4, IDDM12, CELIAC3, ALPS5	Cytotoxic T-lymphocyte-associated serine esterase-4	123890	CTLA4	1493	ENSG00000163599,ENST00000648405;;;ENST00000648405		{Diabetes mellitus, insulin-dependent, 12}	601388		3	Ctla4
2q33.2	2:203867771-203873965	CTLA4, IDDM12, CELIAC3, ALPS5	Cytotoxic T-lymphocyte-associated serine esterase-4	123890	CTLA4	1493	ENSG00000163599,ENST00000648405;;;ENST00000648405		{Hashimoto thyroiditis}	140300	AD	3	Ctla4
2q33.2	2:203867771-203873965	CTLA4, IDDM12, CELIAC3, ALPS5	Cytotoxic T-lymphocyte-associated serine esterase-4	123890	CTLA4	1493	ENSG00000163599,ENST00000648405;;;ENST00000648405		{Systemic lupus erythematosus, susceptibility to}	152700	AD	3	Ctla4
2q33.2	2:203867771-203873965	CTLA4, IDDM12, CELIAC3, ALPS5	Cytotoxic T-lymphocyte-associated serine esterase-4	123890	CTLA4	1493	ENSG00000163599,ENST00000648405;;;ENST00000648405		Immune dysregulation with autoimmunity, immunodeficiency, and lymphoproliferation	616100	AD	3	Ctla4
2q36.1	2:222566899-222656092	FARSB, FARSLB, RILDBC1	Phenylalanine-tRNA synthetase-like, beta subunit	609690	FARSB	10056	ENSG00000116120,ENST00000281828;;;ENST00000281828		Rajab interstitial lung disease with brain calcifications 1	613658	AR	3	Farsb
2q36.3	2:226731312-226799820	IRS1	Insulin receptor substrate-1	147545	IRS1	3667	ENSG00000169047,ENST00000305123;;;ENST00000305123		{Coronary artery disease, susceptibility to}			3	Irs1
2q36.3	2:226731312-226799820	IRS1	Insulin receptor substrate-1	147545	IRS1	3667	ENSG00000169047,ENST00000305123;;;ENST00000305123		{Type 2 diabetes mellitus, susceptibility to}	125853	AD	3	Irs1
2q36.3	2:227683763-227718028	SLC19A3, THMD2, BBGD	Solute carrier family 19 (folate transporter), member 3	606152	SLC19A3	80704	ENSG00000135917,ENST00000644224;;;ENST00000644224		Thiamine metabolism dysfunction syndrome 2 (biotin/thiamine-responsive basal ganglia disease type)	607483	AR	3	Slc19a3
2q37.1	2:230165186-230225636	SP110, IFI41, IFI75, VODI	SP110 nuclear body protein (interferon-induced protein 41, 30kD; interferon-induced protein 75, 52kD)	604457	SP110	3431	ENSG00000135899,ENST00000258381;;;ENST00000258381		{Mycobacterium tuberculosis, susceptibility to}	607948		3	Sp110,Sp110-ps1,Sp110-ps2
2q37.1	2:230165186-230225636	SP110, IFI41, IFI75, VODI	SP110 nuclear body protein (interferon-induced protein 41, 30kD; interferon-induced protein 75, 52kD)	604457	SP110	3431	ENSG00000135899,ENST00000258381;;;ENST00000258381		Hepatic venoocclusive disease with immunodeficiency	235550	AR	3	Sp110,Sp110-ps1,Sp110-ps2
2q37.1	2:232697331-232860605	GIGYF2, KIAA0642, PARK11	GRB10-interacting GYF protein 2	612003	GIGYF2	26058	ENSG00000204120,ENST00000373563;;;ENST00000373563		{Parkinson disease 11}	607688		3	Gigyf2
2q37.1	2:233251673-233295669	ATG16L1, APG16L, IBD10	Autophagy related 16 like 1	610767	ATG16L1	55054	ENSG00000085978,ENST00000392017;;;ENST00000392017		{Inflammatory bowel disease (Crohn disease) 10}	611081		3	Atg16l1
2q37.1	2:233307816-233347055	SAG, RP47, RP96	S-antigen; retina and pineal gland (arrestin)	181031	SAG	6295	ENSG00000130561,ENST00000409110;;;ENST00000409110		Oguchi disease-1	258100	AR	3	Sag
2q37.1	2:233307816-233347055	SAG, RP47, RP96	S-antigen; retina and pineal gland (arrestin)	181031	SAG	6295	ENSG00000130561,ENST00000409110;;;ENST00000409110		Retinitis pigmentosa 47, autosomal recessive	613758	AR	3	Sag
2q37.1	2:233307816-233347055	SAG, RP47, RP96	S-antigen; retina and pineal gland (arrestin)	181031	SAG	6295	ENSG00000130561,ENST00000409110;;;ENST00000409110		Retinitis pigmentosa 96, autosomal dominant	620228	AD	3	Sag
2q37.3	2:240868824-240880500	AGXT, SPAT	Alanine-glyoxylate aminotransferase, liver-specific peroxisomal	604285	AGXT	189	ENSG00000172482,ENST00000307503;;;ENST00000307503		Hyperoxaluria, primary, type 1	259900	AR	3	Agxt
2q37.3	2:241849884-241858894	PDCD1, SLEB2	Programmed cell death 1	600244	PDCD1	5133	ENSG00000188389,ENST00000334409;;;ENST00000334409		{Multiple sclerosis, disease progression, modifier of}	126200	Mu	3	Pdcd1
2q37.3	2:241849884-241858894	PDCD1, SLEB2	Programmed cell death 1	600244	PDCD1	5133	ENSG00000188389,ENST00000334409;;;ENST00000334409		{Systemic lupus erythematosus, susceptibility to, 2}	605218		3	Pdcd1
3p26	3:1-8100000	IBD9	Inflammatory bowel disease 9	608448	IBD9	317669			{Inflammatory bowel disease 9}	608448		2
3p26-p24.2	3:1-26300000	MYMY1, MYMY	Moyamoya disease	252350	MYMY1	50960		max lod at D3S3050	Moyamoya disease	252350	AR	2
3p25.3	3:8733802-8746758	CAV3, LQT9, MPDT, RMD2	Caveolin-3	601253	CAV3	859	ENSG00000182533,ENST00000343849;;;ENST00000343849	within 7-10kb of OXTR	Cardiomyopathy, familial hypertrophic	192600	AD, DD	3	Cav3
3p25.3	3:8733802-8746758	CAV3, LQT9, MPDT, RMD2	Caveolin-3	601253	CAV3	859	ENSG00000182533,ENST00000343849;;;ENST00000343849	within 7-10kb of OXTR	Creatine phosphokinase, elevated serum	123320	AD	3	Cav3
3p25.3	3:8733802-8746758	CAV3, LQT9, MPDT, RMD2	Caveolin-3	601253	CAV3	859	ENSG00000182533,ENST00000343849;;;ENST00000343849	within 7-10kb of OXTR	Long QT syndrome 9	611818	AD	3	Cav3
3p25.3	3:8733802-8746758	CAV3, LQT9, MPDT, RMD2	Caveolin-3	601253	CAV3	859	ENSG00000182533,ENST00000343849;;;ENST00000343849	within 7-10kb of OXTR	Myopathy, distal, Tateyama type	614321	AD	3	Cav3
3p25.3	3:8733802-8746758	CAV3, LQT9, MPDT, RMD2	Caveolin-3	601253	CAV3	859	ENSG00000182533,ENST00000343849;;;ENST00000343849	within 7-10kb of OXTR	Rippling muscle disease 2	606072	AD	3	Cav3
3p22.2	3:39263494-39292966	CX3CR1, GPR13, V28	Chemokine (C-X3-C) receptor 1 (G protein-coupled receptor-13)	601470	CX3CR1	1524	ENSG00000168329,ENST00000399220;;;ENST00000399220		{Coronary artery disease, resistance to}	607339		3	Cx3cr1
3p22.2	3:39263494-39292966	CX3CR1, GPR13, V28	Chemokine (C-X3-C) receptor 1 (G protein-coupled receptor-13)	601470	CX3CR1	1524	ENSG00000168329,ENST00000399220;;;ENST00000399220		{Macular degeneration, age-related, 12}	613784		3	Cx3cr1
3p22.2	3:39263494-39292966	CX3CR1, GPR13, V28	Chemokine (C-X3-C) receptor 1 (G protein-coupled receptor-13)	601470	CX3CR1	1524	ENSG00000168329,ENST00000399220;;;ENST00000399220		{Rapid progression to AIDS from HIV1 infection}	609423		3	Cx3cr1
3p21	3:43600001-54400000	CELIAC9	Celiac disease, susceptibility to, 9	612007	CELIAC9	100188871		associated with rs6441961	{Celiac disease, susceptibility to, 9}	612007		2
3p21	3:43600001-54400000	HSCR6	Hirschsprung disease, susceptibility to, 6	606874	HSCR6	246321			{Hirschsprung disease, susceptibility to, 6}	606874		2
3p21.3	3:43600001-50600000	IBD12	Inflammatory bowel disease 12	612241	IBD12	100188952			{Inflammatory bowel disease 12}	612241		2
3p21.31	3:46354111-46360940	CCR2, CMKBR2, PCLUD	Chemokine (C-C) receptor 2	601267	CCR2	729230	ENSG00000121807,ENST00000445132;;;ENST00000445132		{HIV infection, susceptibility/resistance to}	609423		3	Ccr2
3p21.31	3:46354111-46360940	CCR2, CMKBR2, PCLUD	Chemokine (C-C) receptor 2	601267	CCR2	729230	ENSG00000121807,ENST00000445132;;;ENST00000445132		Polycystic lung disease	219600	AR	3	Ccr2
3p12.2	3:81489703-81761645	GBE1, GSD4, APBD	Glycogen branching enzyme	607839	GBE1	2632	ENSG00000114480,ENST00000429644;;;ENST00000429644		Glycogen storage disease IV	232500	AR	3	Gbe1
3p12.2	3:81489703-81761645	GBE1, GSD4, APBD	Glycogen branching enzyme	607839	GBE1	2632	ENSG00000114480,ENST00000429644;;;ENST00000429644		Polyglucosan body disease, adult form	263570	AR	3	Gbe1
3q13	3:103100001-122200000	CHDS5	Coronary heart disease, susceptibility to, 5	608901					{Coronary heart disease, susceptibility to, 5}	608901		2
3q13.11	3:105655461-105869449	CBLB, ADMIO3	CAS-BR-M murine ecotropic retroviral transforming sequence B	604491	CBLB	868	ENSG00000114423,ENST00000394030;;;ENST00000394030		Autoimmune disease, multisystem, infantile-onset, 3	620430	AR	3	Cblb
3q13.33	3:119468963-119494708	POGLUT1, CLP46, KTELC1, RUMI, C3orf9, DDD4, LGMDR21	Protein O-glucosyltransferase 1	615618	POGLUT1	56983	ENSG00000163389,ENST00000295588;;;ENST00000295588		Dowling-Degos disease 4	615696	AD	3	Poglut1
3q13.33	3:119468963-119494708	POGLUT1, CLP46, KTELC1, RUMI, C3orf9, DDD4, LGMDR21	Protein O-glucosyltransferase 1	615618	POGLUT1	56983	ENSG00000163389,ENST00000295588;;;ENST00000295588		Muscular dystrophy, limb-girdle, autosomal recessive 21	617232	AR	3	Poglut1
3q21.3	3:128051641-128071683	SEC61A1, SEC61, ADTKD5, CVID15	SEC61 translocon, alpha-1 subunit	609213	SEC61A1	29927	ENSG00000058262,ENST00000243253;;;ENST00000243253	mutation identified in 1 SCN11 patient	?Neutropenia, severe congenital, 11, autosomal dominant	620674	AD	3	Sec61a1
3q21.3	3:128051641-128071683	SEC61A1, SEC61, ADTKD5, CVID15	SEC61 translocon, alpha-1 subunit	609213	SEC61A1	29927	ENSG00000058262,ENST00000243253;;;ENST00000243253	mutation identified in 1 SCN11 patient	Immunodeficiency, common variable, 15	620670	AD	3	Sec61a1
3q21.3	3:128051641-128071683	SEC61A1, SEC61, ADTKD5, CVID15	SEC61 translocon, alpha-1 subunit	609213	SEC61A1	29927	ENSG00000058262,ENST00000243253;;;ENST00000243253	mutation identified in 1 SCN11 patient	Tubulointerstitial kidney disease, autosomal dominant, 5	617056	AD	3	Sec61a1
3q21.3	3:128726183-128814798	RAB7, CMT2B, PSN	Ras-associated protein RAB7	602298	RAB7A	7879	ENSG00000075785,ENST00000265062;;;ENST00000265062		Charcot-Marie-Tooth disease, type 2B	600882	AD	3	Rab7
3q22-q24	3:129500001-149200000	AD15	Alzheimer disease 15	604154				max lod at D3S1579	{Alzheimer disease-15}	604154		2
3q22	3:129500001-139000000	PARK21	Parkinson disease 21	616361	PARK21	108353827		conflicting mapping on 20pter-p12	Parkinson disease 21	616361	AD	2
3q22.1	3:130850595-131016712	ATP2C1, BCPM, HHD	ATPase, Ca(2+)-sequestering	604384	ATP2C1	27032	ENSG00000017260,ENST00000510168;;;ENST00000510168		Hailey-Hailey disease	169600	AD	3	Atp2c1
3q22.3	3:138061990-138115608	DZIP1L, DZIP2, PKD5	DAZ-interacting zinc finger protein 1-like	617570	DZIP1L	199221	ENSG00000158163,ENST00000327532;;;ENST00000327532		Polycystic kidney disease 5	617610	AR	3	Dzip1l
3q24	3:148991540-149031775	GYG1, GSD15	Glycogenin 1	603942	GYG1	2992	ENSG00000163754,ENST00000345003;;;ENST00000345003	mutation identified in 1 GSD15 patient	?Glycogen storage disease XV	613507	AR	3	Gyg1
3q24	3:148991540-149031775	GYG1, GSD15	Glycogenin 1	603942	GYG1	2992	ENSG00000163754,ENST00000345003;;;ENST00000345003	mutation identified in 1 GSD15 patient	Polyglucosan body myopathy 2	616199	AR	3	Gyg1
3q25-q26	3:149200001-183000000	CELIAC10	Celiac disease, susceptibility to, 10	612008	CELIAC10	100188872		associated with rs17810546	{Celiac disease, susceptibility to, 10}	612008		2
3q25.2	3:155024202-155183729	MME, CD10, CALLA, NEP, CMT2T, SCA43	Membrane metallo-endopeptidase (common acute lymphocytic leukemia antigen)	120520	MME	4311	ENSG00000196549,ENST00000360490;;;ENST00000360490	mutation identified in 1 SCA43 family	?Spinocerebellar ataxia 43	617018	AD	3	Mme
3q25.2	3:155024202-155183729	MME, CD10, CALLA, NEP, CMT2T, SCA43	Membrane metallo-endopeptidase (common acute lymphocytic leukemia antigen)	120520	MME	4311	ENSG00000196549,ENST00000360490;;;ENST00000360490	mutation identified in 1 SCA43 family	Charcot-Marie-Tooth disease, axonal, type 2T	617017	AD, AR	3	Mme
3q26.33	3:179396088-179527798	GNB4, CMTD1F	Guanine nucleotide-binding protein, beta-4	610863	GNB4	59345	ENSG00000114450,ENST00000232564;;;ENST00000232564		Charcot-Marie-Tooth disease, dominant intermediate F	615185	AD	3	Gnb4
3q27.1	3:184314606-184335358	EIF4G1, EIF4G, PARK18	Eukaryotic translation initiation factor 4 gamma, 1	600495	EIF4G1	1981	ENSG00000114867,ENST00000346169;;;ENST00000346169	amplified in squamous cell lung cancer	{Parkinson disease 18}	614251	AD	3	Eif4g1
3q27.3	3:186570720-186585793	DNAJB11, HEDJ, DJ9, ABBP2, PKD6	DNAJ/HSP40 homolog, subfamily B, member 11	611341	DNAJB11	51726	ENSG00000090520,ENST00000265028;;;ENST00000265028		Polycystic kidney disease 6 with or without polycystic liver disease	618061	AD	3	Dnajb11
3q28	3:188200001-192600000	CELIAC11	Celiac disease, susceptibility to, 11	612009	CELIAC11	100188873		associated with rs1464510	{Celiac disease, susceptibility to, 11}	612009		2
4p16.3	4:3074681-3243960	HTT, HD, IT15, LOMARS	Huntingtin	613004	HTT	3064	ENSG00000197386,ENST00000355072;;;ENST00000355072	distal to D4S10	Huntington disease	143100	AD	3	Htt
4p16.3	4:3074681-3243960	HTT, HD, IT15, LOMARS	Huntingtin	613004	HTT	3064	ENSG00000197386,ENST00000355072;;;ENST00000355072	distal to D4S10	Lopes-Maciel-Rodan syndrome	617435	AR	3	Htt
4p15.3	4:11300001-21300000	HDL3, HLN2	Huntington disease-like 3	604802	HDL3	53369			Huntington disease-like 3	604802	AR	2
4p15.32	4:15968228-16084023	PROM1, PROML1, AC133, RP41, CORD12, CD133, MCDR2, STGD4	Prominin 1	604365	PROM1	8842	ENSG00000007062,ENST00000447510;;;ENST00000447510		Cone-rod dystrophy 12	612657	AD, AR	3	Prom1
4p15.32	4:15968228-16084023	PROM1, PROML1, AC133, RP41, CORD12, CD133, MCDR2, STGD4	Prominin 1	604365	PROM1	8842	ENSG00000007062,ENST00000447510;;;ENST00000447510		Macular dystrophy, retinal, 2	608051	AD	3	Prom1
4p15.32	4:15968228-16084023	PROM1, PROML1, AC133, RP41, CORD12, CD133, MCDR2, STGD4	Prominin 1	604365	PROM1	8842	ENSG00000007062,ENST00000447510;;;ENST00000447510		Retinitis pigmentosa 41	612095	AR	3	Prom1
4p15.32	4:15968228-16084023	PROM1, PROML1, AC133, RP41, CORD12, CD133, MCDR2, STGD4	Prominin 1	604365	PROM1	8842	ENSG00000007062,ENST00000447510;;;ENST00000447510		Stargardt disease 4	603786	AD	3	Prom1
4p13	4:41256928-41268455	UCHL1, PARK5, SPG79, NDGOA, SPG79A	Ubiquitin C-terminal esterase L1	191342	UCHL1	7345	ENSG00000154277,ENST00000284440;;;ENST00000284440	mutation identified in 1 PARK5 family	{?Parkinson disease 5, susceptibility to}	613643	AD	3	Uchl1
4p13	4:41256928-41268455	UCHL1, PARK5, SPG79, NDGOA, SPG79A	Ubiquitin C-terminal esterase L1	191342	UCHL1	7345	ENSG00000154277,ENST00000284440;;;ENST00000284440	mutation identified in 1 PARK5 family	Spastic paraplegia 79A, autosomal dominant	620221	AD	3	Uchl1
4p13	4:41256928-41268455	UCHL1, PARK5, SPG79, NDGOA, SPG79A	Ubiquitin C-terminal esterase L1	191342	UCHL1	7345	ENSG00000154277,ENST00000284440;;;ENST00000284440	mutation identified in 1 PARK5 family	Spastic paraplegia 79B, autosomal recessive	615491	AR	3	Uchl1
4p13	4:41744082-41748725	PHOX2B, NBPHOX, PMX2B, NBLST2, CCHS	Paired mesoderm homeobox 2B	603851	PHOX2B	8929	ENSG00000109132,ENST00000226382;;;ENST00000226382		{Neuroblastoma, susceptibility to, 2}	613013		3	Phox2b
4p13	4:41744082-41748725	PHOX2B, NBPHOX, PMX2B, NBLST2, CCHS	Paired mesoderm homeobox 2B	603851	PHOX2B	8929	ENSG00000109132,ENST00000226382;;;ENST00000226382		Central hypoventilation syndrome, congenital, 1, with or without Hirschsprung disease	209880	AD	3	Phox2b
4p13	4:41744082-41748725	PHOX2B, NBPHOX, PMX2B, NBLST2, CCHS	Paired mesoderm homeobox 2B	603851	PHOX2B	8929	ENSG00000109132,ENST00000226382;;;ENST00000226382		Neuroblastoma with Hirschsprung disease	613013		3	Phox2b
4q13-q21	4:58500001-87100000	AIS4, VAMAS5	Autoimmune disease, susceptibility to, 4	609400	AIS4	619405		between D4S392 and D4S3042	{Autoimmune disease, susceptibility to, 4}	609400		2
4q22.1	4:87303794-87322882	HSD17B13, SCDR9, FLDP	17-beta-hydroxysteroid dehydrogenase XIII	612127	HSD17B13	345275	ENSG00000170509,ENST00000328546;;;ENST00000328546		{Fatty liver disease, protection from}	620116	AD	3	Hsd17b13
4q22.1	4:88007635-88077777	PKD2	Polycystin-2	173910	PKD2	5311	ENSG00000118762,ENST00000237596;;;ENST00000237596		Polycystic kidney disease 2	613095	AD	3	Pkd2
4q22.1	4:88257620-88284561	PPM1K, PP2CM, PTMP, MSUDMV	Protein phosphatase, PP2C domain-containing, 1K	611065	PPM1K	152926	ENSG00000163644,ENST00000608933;;;ENST00000608933		Maple syrup urine disease, mild variant	615135	AR	3	Ppm1k
4q22.1	4:89724099-89838304	SNCA, NACP, PARK1, PARK4	Synuclein, alpha (non A4 component of amyloid precursor)	163890	SNCA	6622	ENSG00000145335,ENST00000394991;;;ENST00000394991		Dementia, Lewy body	127750	AD	3	Snca
4q22.1	4:89724099-89838304	SNCA, NACP, PARK1, PARK4	Synuclein, alpha (non A4 component of amyloid precursor)	163890	SNCA	6622	ENSG00000145335,ENST00000394991;;;ENST00000394991		Parkinson disease 1	168601	AD	3	Snca
4q22.1	4:89724099-89838304	SNCA, NACP, PARK1, PARK4	Synuclein, alpha (non A4 component of amyloid precursor)	163890	SNCA	6622	ENSG00000145335,ENST00000394991;;;ENST00000394991		Parkinson disease 4	605543	AD	3	Snca
4q23	4:99336497-99352746	ADH1C, ADH3	Alcohol dehydrogenase IC (class I), gamma polypeptide	103730	ADH1C	126	ENSG00000248144,ENST00000515683;;;ENST00000515683		{Alcohol dependence, protection against}	103780	Mu	3	Adh1
4q23	4:99336497-99352746	ADH1C, ADH3	Alcohol dehydrogenase IC (class I), gamma polypeptide	103730	ADH1C	126	ENSG00000248144,ENST00000515683;;;ENST00000515683		{Parkinson disease, susceptibility to}	168600	AD, Mu	3	Adh1
4q27	4:119900001-122800000	CELIAC6, AIS5	Celiac disease, susceptibility to, 6	611598	CELIAC6	100188846			{Autoimmune disease, susceptibility to, 5}	611598		2
4q27	4:119900001-122800000	CELIAC6, AIS5	Celiac disease, susceptibility to, 6	611598	CELIAC6	100188846			{Celiac disease, susceptibility to, 6}	611598		2
4q31.3-q32.3	4:150200001-169200000	HSCR9	Hirschsprung disease, susceptibility to, 9	611644	HSCR9	100188850		between D4S3049 and D4S1566	{Hirschsprung disease, susceptibility to, 9}	611644		2
4q31.3	4:153152163-153339317	TRIM2, KIAA0517, CMT2R	Tripartite motif-containing protein 2	614141	TRIM2	23321	ENSG00000109654,ENST00000338700;;;ENST00000338700		Charcot-Marie-Tooth disease, type 2R	615490	AR	3	Trim2
5p13.2	5:37812677-37840041	GDNF, HSCR3	Glial cell line derived neurotrophic factor	600837	GDNF	2668	ENSG00000168621,ENST00000326524;;;ENST00000326524		{Hirschsprung disease, susceptibility to, 3}	613711	AD	3	Gdnf
5p13.1	5:38400001-42500000	IBD18	Inflammatory bowel disease 18	612262	IBD18	100190931		associated with rs1373692	{Inflammatory bowel disease 18}	612262		2
5q13.3	5:74640023-74721288	HEXB	Hexosaminidase B, beta polypeptide	606873	HEXB	3074	ENSG00000049860,ENST00000261416;;;ENST00000261416		Sandhoff disease, infantile, juvenile, and adult forms	268800	AR	3	Hexb
5q13.3	5:77086715-77428256	PDE8B, PPNAD3, ADSD	Phosphodiesterase 8B	603390	PDE8B	8622	ENSG00000113231,ENST00000264917;;;ENST00000264917		Pigmented nodular adrenocortical disease, primary, 3	614190		3	Pde8b
5q13.3	5:77086715-77428256	PDE8B, PPNAD3, ADSD	Phosphodiesterase 8B	603390	PDE8B	8622	ENSG00000113231,ENST00000264917;;;ENST00000264917		Striatal degeneration, autosomal dominant	609161	AD	3	Pde8b
5q22.2	5:112707498-112846239	APC, GS, FPC, BTPS2, DESMD	APC regulator of WNT signaling pathway	611731	APC	324	ENSG00000134982,ENST00000257430;;;ENST00000257430	150kb distal to MCC	Adenoma, periampullary, somatic	175100		3	Apc
5q22.2	5:112707498-112846239	APC, GS, FPC, BTPS2, DESMD	APC regulator of WNT signaling pathway	611731	APC	324	ENSG00000134982,ENST00000257430;;;ENST00000257430	150kb distal to MCC	Adenomatous polyposis coli	175100	AD	3	Apc
5q22.2	5:112707498-112846239	APC, GS, FPC, BTPS2, DESMD	APC regulator of WNT signaling pathway	611731	APC	324	ENSG00000134982,ENST00000257430;;;ENST00000257430	150kb distal to MCC	Brain tumor-polyposis syndrome 2	175100	AD	3	Apc
5q22.2	5:112707498-112846239	APC, GS, FPC, BTPS2, DESMD	APC regulator of WNT signaling pathway	611731	APC	324	ENSG00000134982,ENST00000257430;;;ENST00000257430	150kb distal to MCC	Colorectal cancer, somatic	114500		3	Apc
5q22.2	5:112707498-112846239	APC, GS, FPC, BTPS2, DESMD	APC regulator of WNT signaling pathway	611731	APC	324	ENSG00000134982,ENST00000257430;;;ENST00000257430	150kb distal to MCC	Desmoid disease, hereditary	135290	AD	3	Apc
5q22.2	5:112707498-112846239	APC, GS, FPC, BTPS2, DESMD	APC regulator of WNT signaling pathway	611731	APC	324	ENSG00000134982,ENST00000257430;;;ENST00000257430	150kb distal to MCC	Gardner syndrome	175100	AD	3	Apc
5q22.2	5:112707498-112846239	APC, GS, FPC, BTPS2, DESMD	APC regulator of WNT signaling pathway	611731	APC	324	ENSG00000134982,ENST00000257430;;;ENST00000257430	150kb distal to MCC	Gastric adenocarcinoma and proximal polyposis of the stomach	619182	AD	3	Apc
5q22.2	5:112707498-112846239	APC, GS, FPC, BTPS2, DESMD	APC regulator of WNT signaling pathway	611731	APC	324	ENSG00000134982,ENST00000257430;;;ENST00000257430	150kb distal to MCC	Gastric cancer, somatic	613659		3	Apc
5q22.2	5:112707498-112846239	APC, GS, FPC, BTPS2, DESMD	APC regulator of WNT signaling pathway	611731	APC	324	ENSG00000134982,ENST00000257430;;;ENST00000257430	150kb distal to MCC	Hepatoblastoma, somatic	114550		3	Apc
5q31-q33	5:131200001-160500000	AITD2	Autoimmune thyroid disease, susceptibility to, 2	608174	AITD2	387579			{Autoimmune thyroid disease, susceptibility to, 2}	608174		2
5q31-q33	5:131200001-160500000	CELIAC2	Celiac disease, susceptibility to, 2	609754	CELIAC2	317782			{Celiac disease, susceptibility to, 2}	609754		2
5q31	5:131200001-145100000	IBD5	Inflammatory bowel disease 5	606348	IBD5	50941			{Inflammatory bowel disease 5}	606348		2
5q31	5:131200001-145100000	PDB4	Paget disease of bone 4	606263	PDB4	94003			Paget disease of bone 4	606263	AD	2
5q31.1	5:132873668-132875046	LEAP2	Liver-expressed antimicrobial peptide 2	611373	LEAP2	116842	ENSG00000164406,ENST00000296877;;;ENST00000296877					Leap2
5q31.1	5:134601149-134632828	SAR1B, CMRD, SARA2, ANDD	Sar1a, S. cerevisiae, homolog 2	607690	SAR1B	51128	ENSG00000152700,ENST00000402673;;;ENST00000402673		Chylomicron retention disease	246700	AR	3	Sar1b
5q31.3	5:140673905-140691370	HARS1, HARS, USH3B, CMT2W	Histidyl-tRNA synthetase 1	142810	HARS1	3035	ENSG00000170445,ENST00000504156;;;ENST00000504156		Charcot-Marie-Tooth disease, axonal, type 2W	616625	AD	3	Hars1
5q31.3	5:140673905-140691370	HARS1, HARS, USH3B, CMT2W	Histidyl-tRNA synthetase 1	142810	HARS1	3035	ENSG00000170445,ENST00000504156;;;ENST00000504156		Usher syndrome type 3B	614504	AR	3	Hars1
5q32	5:146113034-146182650	LARS1, LARS, LFIS, ILFS1	Leucyl-tRNA synthetase 1	151350	LARS1	51520	ENSG00000133706,ENST00000394434;;;ENST00000394434	mutation identified in 1 family	?Infantile liver failure syndrome 1	615438	AR	3	Lars1
5q32	5:148982150-149063062	SH3TC2, KIAA1985, MNMN	SH3 domain and tetratricopeptide repeat domain 2	608206	SH3TC2	79628	ENSG00000169247,ENST00000515425;;;ENST00000515425		Charcot-Marie-Tooth disease, type 4C	601596	AR	3	Sh3tc2
5q32	5:148982150-149063062	SH3TC2, KIAA1985, MNMN	SH3 domain and tetratricopeptide repeat domain 2	608206	SH3TC2	79628	ENSG00000169247,ENST00000515425;;;ENST00000515425		Mononeuropathy of the median nerve, mild	613353	AD	3	Sh3tc2
5q33.1	5:150846521-150902402	IRGM, LRG47, IFI1, IBD19	Immunity-related GTPase family, M	608212	IRGM	345611	ENSG00000237693,ENST00000522154;;;ENST00000522154		{Inflammatory bowel disease (Crohn disease) 19}	612278		3	Igtp,Irgm1,Irgm2
5q33.1	5:150846521-150902402	IRGM, LRG47, IFI1, IBD19	Immunity-related GTPase family, M	608212	IRGM	345611	ENSG00000237693,ENST00000522154;;;ENST00000522154		{Mycobacterium tuberculosis, protection against}	607948		3	Igtp,Irgm1,Irgm2
5q35.3	5:179806393-179838078	SQSTM1, P62, PDB3, FTDALS3, NADGP, DMRV	Sequestosome 1	601530	SQSTM1	8878	ENSG00000161011,ENST00000389805;;;ENST00000389805		Frontotemporal dementia and/or amyotrophic lateral sclerosis 3	616437	AD	3	Sqstm1
5q35.3	5:179806393-179838078	SQSTM1, P62, PDB3, FTDALS3, NADGP, DMRV	Sequestosome 1	601530	SQSTM1	8878	ENSG00000161011,ENST00000389805;;;ENST00000389805		Myopathy, distal, with rimmed vacuoles	617158	AD	3	Sqstm1
5q35.3	5:179806393-179838078	SQSTM1, P62, PDB3, FTDALS3, NADGP, DMRV	Sequestosome 1	601530	SQSTM1	8878	ENSG00000161011,ENST00000389805;;;ENST00000389805		Neurodegeneration with ataxia, dystonia, and gaze palsy, childhood-onset	617145	AR	3	Sqstm1
5q35.3	5:179806393-179838078	SQSTM1, P62, PDB3, FTDALS3, NADGP, DMRV	Sequestosome 1	601530	SQSTM1	8878	ENSG00000161011,ENST00000389805;;;ENST00000389805		Paget disease of bone 3	167250	AD	3	Sqstm1
6p21.3	6:30500001-36600000	IBD3	Inflammatory bowel disease 3	604519	IBD3	30829			{Inflammatory bowel disease 3}	604519	AD	2
6p21.3	6:30500001-36600000	VAMAS6	Vitiligo-associated multiple autoimmune disease susceptibility 6	193200	VAMAS6	246319		possible second locus on 1p31.3-p32.2	{Vitiligo-associated multiple autoimmune disease susceptibility 6}	193200	AR	2
6p21.33	6:30653127-30673006	DHX16, DDX16, DBP2, PRP8, NMOAS	DEAH-box helicase 16	603405	DHX16	8449	ENSG00000204560,ENST00000376442;;;ENST00000376442		Neuromuscular disease and ocular or auditory anomalies with or without seizures	618733	AD	3	Dhx16
6p21.33	6:31353875-31357179	HLA-B, SPDA1	Major histocompatibility complex, class I, B	142830	HLA-B	3106	ENSG00000234745,ENST00000412585;;;ENST00000412585		{Abacavir hypersensitivity, susceptibility to}			3	H2-D1,H2-K1,H2-M1,H2-M10.1,H2-M10.2,H2-M10.3,H2-M10.4,H2-M10.5,H2-M10.6,H2-M11,H2-M2,H2-M5,H2-M9,H2-Q1,H2-Q10,H2-Q2,H2-Q4,H2-Q6,H2-Q7,H2-T10,H2-T22,H2-T3
6p21.33	6:31353875-31357179	HLA-B, SPDA1	Major histocompatibility complex, class I, B	142830	HLA-B	3106	ENSG00000234745,ENST00000412585;;;ENST00000412585		{Drug-induced liver injury due to flucloxacillin}			3	H2-D1,H2-K1,H2-M1,H2-M10.1,H2-M10.2,H2-M10.3,H2-M10.4,H2-M10.5,H2-M10.6,H2-M11,H2-M2,H2-M5,H2-M9,H2-Q1,H2-Q10,H2-Q2,H2-Q4,H2-Q6,H2-Q7,H2-T10,H2-T22,H2-T3
6p21.33	6:31353875-31357179	HLA-B, SPDA1	Major histocompatibility complex, class I, B	142830	HLA-B	3106	ENSG00000234745,ENST00000412585;;;ENST00000412585		{Spondyloarthropathy, susceptibility to, 1}	106300	Mu	3	H2-D1,H2-K1,H2-M1,H2-M10.1,H2-M10.2,H2-M10.3,H2-M10.4,H2-M10.5,H2-M10.6,H2-M11,H2-M2,H2-M5,H2-M9,H2-Q1,H2-Q10,H2-Q2,H2-Q4,H2-Q6,H2-Q7,H2-T10,H2-T22,H2-T3
6p21.33	6:31353875-31357179	HLA-B, SPDA1	Major histocompatibility complex, class I, B	142830	HLA-B	3106	ENSG00000234745,ENST00000412585;;;ENST00000412585		{Stevens-Johnson syndrome, susceptibility to}	608579		3	H2-D1,H2-K1,H2-M1,H2-M10.1,H2-M10.2,H2-M10.3,H2-M10.4,H2-M10.5,H2-M10.6,H2-M11,H2-M2,H2-M5,H2-M9,H2-Q1,H2-Q10,H2-Q2,H2-Q4,H2-Q6,H2-Q7,H2-T10,H2-T22,H2-T3
6p21.33	6:31353875-31357179	HLA-B, SPDA1	Major histocompatibility complex, class I, B	142830	HLA-B	3106	ENSG00000234745,ENST00000412585;;;ENST00000412585		{Synovitis, chronic, susceptibility to}			3	H2-D1,H2-K1,H2-M1,H2-M10.1,H2-M10.2,H2-M10.3,H2-M10.4,H2-M10.5,H2-M10.6,H2-M11,H2-M2,H2-M5,H2-M9,H2-Q1,H2-Q10,H2-Q2,H2-Q4,H2-Q6,H2-Q7,H2-T10,H2-T22,H2-T3
6p21.33	6:31353875-31357179	HLA-B, SPDA1	Major histocompatibility complex, class I, B	142830	HLA-B	3106	ENSG00000234745,ENST00000412585;;;ENST00000412585		{Toxic epidermal necrolysis, susceptibility to}	608579		3	H2-D1,H2-K1,H2-M1,H2-M10.1,H2-M10.2,H2-M10.3,H2-M10.4,H2-M10.5,H2-M10.6,H2-M11,H2-M2,H2-M5,H2-M9,H2-Q1,H2-Q10,H2-Q2,H2-Q4,H2-Q6,H2-Q7,H2-T10,H2-T22,H2-T3
6p21.32	6:32637406-32655272	HLA-DQA1, CELIAC1	Major histocompatibility complex, class II, DQ alpha-1	146880	HLA-DQA1	3117	ENSG00000196735,ENST00000343139;;;ENST00000343139		{Celiac disease, susceptibility to}	212750	AR, Mu	3	H2-Aa
6p21.32	6:32659467-32666657	HLA-DQB1, CELIAC1	Major histocompatibility complex, class II, DQ beta-1	604305	HLA-DQB1	3119	ENSG00000179344,ENST00000434651;;;ENST00000434651		{Celiac disease, susceptibility to}	212750	AR, Mu	3	H2-Ab1
6p21.32	6:32659467-32666657	HLA-DQB1, CELIAC1	Major histocompatibility complex, class II, DQ beta-1	604305	HLA-DQB1	3119	ENSG00000179344,ENST00000434651;;;ENST00000434651		{Creutzfeldt-Jakob disease, variant, resistance to}	123400	AD	3	H2-Ab1
6p21.32	6:32659467-32666657	HLA-DQB1, CELIAC1	Major histocompatibility complex, class II, DQ beta-1	604305	HLA-DQB1	3119	ENSG00000179344,ENST00000434651;;;ENST00000434651		{Multiple sclerosis, susceptibility to, 1}	126200	Mu	3	H2-Ab1
6p21.32	6:33075990-33089696	HLA-DPB1	Major histocompatibility complex, class II, DP beta-1	142858	HLA-DPB1	3115	ENSG00000223865,ENST00000418931;;;ENST00000418931		{Beryllium disease, chronic, susceptibility to}			3
6p21.31	6:33621322-33696562	ITPR3, CMT1J	Inositol 1,4,5-triphosphate receptor, type 3	147267	ITPR3	3710	ENSG00000096433,ENST00000605930;;;ENST00000605930		{Diabetes, type 1, susceptibility to}	222100	AR	2	Itpr3
6p21.31	6:33621322-33696562	ITPR3, CMT1J	Inositol 1,4,5-triphosphate receptor, type 3	147267	ITPR3	3710	ENSG00000096433,ENST00000605930;;;ENST00000605930		Charcot-Marie-Tooth disease, demyelinating, type 1J	620111	AD	3	Itpr3
6p21.2	6:36600001-40500000	AD17	Alzheimer disease 17	615080	AD17	101290498		associated with rs75932628T	Alzheimer disease 17	615080		2
6p12.3-p12.2	6:51615299-52087615	PKHD1, PCYT, ARPKD, PKD4	PKHD1 ciliary IPT domain containing fibrocystin/polyductin	606702	PKHD1	5314	ENSG00000170927,ENST00000371117;;;ENST00000371117		Polycystic kidney disease 4, with or without hepatic disease	263200	AR	3	Pkhd1
6p11	6:57200001-59800000	AITD1	Autoimmune thyroid disease, susceptibility to, 1	608173	AITD1	387578			{Autoimmune thyroid disease, susceptibility to, 1}	608173		2
6q13	6:73593379-73653992	SLC17A5, SIASD, SLD	Solute carrier family 17 (sodium phosphate), member 5	604322	SLC17A5	26503	ENSG00000119899,ENST00000355773;;;ENST00000355773		Salla disease	604369	AR	3	Slc17a5
6q13	6:73593379-73653992	SLC17A5, SIASD, SLD	Solute carrier family 17 (sodium phosphate), member 5	604322	SLC17A5	26503	ENSG00000119899,ENST00000355773;;;ENST00000355773		Sialic acid storage disorder, infantile	269920	AR	3	Slc17a5
6q14.1	6:75237675-75250298	COX7A2	Cytochrome c oxidase, subunit VIIa, polypeptide-2, liver	123996	COX7A2	1347	ENSG00000112695,ENST00000684430;;;ENST00000684430	previously thought to be on chr.4				Cox7a2
6q14.1	6:79914814-79947553	ELOVL4, ADMD, STGD2, STGD3, ISQMR, SCA34	Elongation of very long chain fatty acids 4	605512	ELOVL4	6785	ENSG00000118402,ENST00000369816;;;ENST00000369816		Ichthyosis, spastic quadriplegia, and impaired intellectual development	614457	AR	3	Elovl4
6q14.1	6:79914814-79947553	ELOVL4, ADMD, STGD2, STGD3, ISQMR, SCA34	Elongation of very long chain fatty acids 4	605512	ELOVL4	6785	ENSG00000118402,ENST00000369816;;;ENST00000369816		Spinocerebellar ataxia 34	133190	AD	3	Elovl4
6q14.1	6:79914814-79947553	ELOVL4, ADMD, STGD2, STGD3, ISQMR, SCA34	Elongation of very long chain fatty acids 4	605512	ELOVL4	6785	ENSG00000118402,ENST00000369816;;;ENST00000369816		Stargardt disease 3	600110	AD	3	Elovl4
6q14.1	6:80106610-80466676	BCKDHB, E1B, MSUD1B	Branched chain keto acid dehydrogenase E1, beta polypeptide	248611	BCKDHB	594	ENSG00000083123,ENST00000320393;;;ENST00000320393		Maple syrup urine disease, type Ib	620698	AR	3	Bckdhb
6q21	6:107867756-107958208	SEC63, PCLD2	SEC63 homolog, protein translocation regulator	608648	SEC63	11231	ENSG00000025796,ENST00000369002;;;ENST00000369002		Polycystic liver disease 2	617004	AD	3	Sec63
6q21	6:109691296-109825426	FIG4, KIAA0274, SAC3, ALS11, YVS, BTOP	FIG4 phosphoinositide 5-phosphatase	609390	FIG4	9896	ENSG00000112367,ENST00000230124;;;ENST00000230124	mutation identified in 1 BTOP family	?Polymicrogyria, bilateral temporooccipital	612691	AR	3	Fig4
6q21	6:109691296-109825426	FIG4, KIAA0274, SAC3, ALS11, YVS, BTOP	FIG4 phosphoinositide 5-phosphatase	609390	FIG4	9896	ENSG00000112367,ENST00000230124;;;ENST00000230124	mutation identified in 1 BTOP family	Amyotrophic lateral sclerosis 11	612577	AD	3	Fig4
6q21	6:109691296-109825426	FIG4, KIAA0274, SAC3, ALS11, YVS, BTOP	FIG4 phosphoinositide 5-phosphatase	609390	FIG4	9896	ENSG00000112367,ENST00000230124;;;ENST00000230124	mutation identified in 1 BTOP family	Charcot-Marie-Tooth disease, type 4J	611228	AR	3	Fig4
6q21	6:109691296-109825426	FIG4, KIAA0274, SAC3, ALS11, YVS, BTOP	FIG4 phosphoinositide 5-phosphatase	609390	FIG4	9896	ENSG00000112367,ENST00000230124;;;ENST00000230124	mutation identified in 1 BTOP family	Yunis-Varon syndrome	216340	AR	3	Fig4
6q23.2	6:131573226-131584329	ARG1	Arginase, liver	608313	ARG1	383	ENSG00000118520,ENST00000368087;;;ENST00000368087		Argininemia	207800	AR	3	Arg1
6q23.2	6:131808020-131895155	ENPP1, PDNP1, NPPS, M6S1, PCA1, ARHR2, COLED	Ectonucleotide pyrophosphatase/phosphodiesterase 1 (Ly-41 antigen, mouse, homolog of)	173335	ENPP1	5167	ENSG00000197594,ENST00000647893;;;ENST00000647893		{Diabetes mellitus, non-insulin-dependent, susceptibility to}	125853	AD	3	Enpp1
6q23.2	6:131808020-131895155	ENPP1, PDNP1, NPPS, M6S1, PCA1, ARHR2, COLED	Ectonucleotide pyrophosphatase/phosphodiesterase 1 (Ly-41 antigen, mouse, homolog of)	173335	ENPP1	5167	ENSG00000197594,ENST00000647893;;;ENST00000647893		{Obesity, susceptibility to}	601665	AD, AR, Mu	3	Enpp1
6q23.2	6:131808020-131895155	ENPP1, PDNP1, NPPS, M6S1, PCA1, ARHR2, COLED	Ectonucleotide pyrophosphatase/phosphodiesterase 1 (Ly-41 antigen, mouse, homolog of)	173335	ENPP1	5167	ENSG00000197594,ENST00000647893;;;ENST00000647893		Arterial calcification, generalized, of infancy, 1	208000	AR	3	Enpp1
6q23.2	6:131808020-131895155	ENPP1, PDNP1, NPPS, M6S1, PCA1, ARHR2, COLED	Ectonucleotide pyrophosphatase/phosphodiesterase 1 (Ly-41 antigen, mouse, homolog of)	173335	ENPP1	5167	ENSG00000197594,ENST00000647893;;;ENST00000647893		Cole disease	615522	AD	3	Enpp1
6q23.2	6:131808020-131895155	ENPP1, PDNP1, NPPS, M6S1, PCA1, ARHR2, COLED	Ectonucleotide pyrophosphatase/phosphodiesterase 1 (Ly-41 antigen, mouse, homolog of)	173335	ENPP1	5167	ENSG00000197594,ENST00000647893;;;ENST00000647893		Hypophosphatemic rickets, autosomal recessive, 2	613312	AR	3	Enpp1
6q24.3	6:146543833-146554953	RAB32, PARK26	Ras-associated protein RAB32	612906	RAB32	10981	ENSG00000118508,ENST00000367495;;;ENST00000367495		{Parkinson disease 26, autosomal dominant, susceptibility to}	620923	AD	3	Rab32
6q25.3	6:155200001-160600000	CELIAC12	Celiac disease, susceptibility to, 12	612010	CELIAC12	100188874		in LD block containing TAGAP	{Celiac disease, susceptibility to, 12}	612010		2
6q25.3-q26	6:160531482-160664275	LPA	Apolipoprotein Lp(a)	152200	LPA	4018	ENSG00000198670,ENST00000316300;;;ENST00000316300	absent in mice	[LPA deficiency, congenital]	618807	AD	3
6q25.3-q26	6:160531482-160664275	LPA	Apolipoprotein Lp(a)	152200	LPA	4018	ENSG00000198670,ENST00000316300;;;ENST00000316300	absent in mice	{Coronary artery disease, susceptibility to}	618807	AD	3
6q26	6:161347417-162727766	PRKN, PARK2, PDJ	Parkin RBR E3 ubiquitin protein ligase	602544	PRKN	5071	ENSG00000185345,ENST00000366898;;;ENST00000366898	shares 5' regulatory region and both 3' UTRs with PACRG	Adenocarcinoma of lung, somatic	211980		3	Prkn
6q26	6:161347417-162727766	PRKN, PARK2, PDJ	Parkin RBR E3 ubiquitin protein ligase	602544	PRKN	5071	ENSG00000185345,ENST00000366898;;;ENST00000366898	shares 5' regulatory region and both 3' UTRs with PACRG	Ovarian cancer, somatic	167000		3	Prkn
6q26	6:161347417-162727766	PRKN, PARK2, PDJ	Parkin RBR E3 ubiquitin protein ligase	602544	PRKN	5071	ENSG00000185345,ENST00000366898;;;ENST00000366898	shares 5' regulatory region and both 3' UTRs with PACRG	Parkinson disease, juvenile, type 2	600116	AR	3	Prkn
6q27	6:170554369-170572859	TBP, SCA17, HDL4	TATA box binding protein	600075	TBP	6908	ENSG00000112592,ENST00000392092;;;ENST00000392092		{Parkinson disease, susceptibility to}	168600	AD, Mu	3	Tbp
6q27	6:170554369-170572859	TBP, SCA17, HDL4	TATA box binding protein	600075	TBP	6908	ENSG00000112592,ENST00000392092;;;ENST00000392092		Spinocerebellar ataxia 17	607136	AD	3	Tbp
7p15.3	7:22727200-22731998	IL6, IFNB2, BSF2, HSF, HGF	Interleukin-6 (interferon, beta-2)	147620	IL6	3569	ENSG00000136244,ENST00000258743;;;ENST00000258743		{Crohn disease-associated growth failure}	266600	Mu	3	Il6
7p15.3	7:22727200-22731998	IL6, IFNB2, BSF2, HSF, HGF	Interleukin-6 (interferon, beta-2)	147620	IL6	3569	ENSG00000136244,ENST00000258743;;;ENST00000258743		{Intracranial hemorrhage in brain cerebrovascular malformations, susceptibility to}	108010	SMu	3	Il6
7p15.3	7:22727200-22731998	IL6, IFNB2, BSF2, HSF, HGF	Interleukin-6 (interferon, beta-2)	147620	IL6	3569	ENSG00000136244,ENST00000258743;;;ENST00000258743		{Kaposi sarcoma in HIV+, susceptibility to}	148000	AD	3	Il6
7p15.3	7:22727200-22731998	IL6, IFNB2, BSF2, HSF, HGF	Interleukin-6 (interferon, beta-2)	147620	IL6	3569	ENSG00000136244,ENST00000258743;;;ENST00000258743		{Rheumatoid arthritis, systemic juvenile}	604302		3	Il6
7p15.3	7:22727200-22731998	IL6, IFNB2, BSF2, HSF, HGF	Interleukin-6 (interferon, beta-2)	147620	IL6	3569	ENSG00000136244,ENST00000258743;;;ENST00000258743		{Type 1 diabetes mellitus}	222100	AR	3	Il6
7p15.3	7:22727200-22731998	IL6, IFNB2, BSF2, HSF, HGF	Interleukin-6 (interferon, beta-2)	147620	IL6	3569	ENSG00000136244,ENST00000258743;;;ENST00000258743		{Type 2 diabetes mellitus}	125853	AD	3	Il6
7p15.2	7:26189927-26200746	HNRPA2B1, IBMPFD2, OPMD2	Heterogeneous nuclear ribonucleoprotein A2/B1	600124	HNRNPA2B1	3181	ENSG00000122566,ENST00000618183;;;ENST00000618183	mutation identified in 1 IBMPFD2 family	?Inclusion body myopathy with early-onset Paget disease with or without frontotemporal dementia 2	615422	AD	3	Hnrnpa2b1
7p15.2	7:26189927-26200746	HNRPA2B1, IBMPFD2, OPMD2	Heterogeneous nuclear ribonucleoprotein A2/B1	600124	HNRNPA2B1	3181	ENSG00000122566,ENST00000618183;;;ENST00000618183	mutation identified in 1 IBMPFD2 family	Oculopharyngeal muscular dystrophy 2	620460	AD	3	Hnrnpa2b1
7p14.3	7:30594735-30634033	GARS1, GARS, SMAD1, CMT2D, HMND5, SMAJI	Glycyl-tRNA synthetase 1	600287	GARS1	2617	ENSG00000106105,ENST00000389266;;;ENST00000389266		Charcot-Marie-Tooth disease, type 2D	601472	AD	3	Gars1
7p14.3	7:30594735-30634033	GARS1, GARS, SMAD1, CMT2D, HMND5, SMAJI	Glycyl-tRNA synthetase 1	600287	GARS1	2617	ENSG00000106105,ENST00000389266;;;ENST00000389266		Neuronopathy, distal hereditary motor, autosomal dominant 5	600794	AD	3	Gars1
7p14.3	7:30594735-30634033	GARS1, GARS, SMAD1, CMT2D, HMND5, SMAJI	Glycyl-tRNA synthetase 1	600287	GARS1	2617	ENSG00000106105,ENST00000389266;;;ENST00000389266		Spinal muscular atrophy, infantile, James type	619042	AD	3	Gars1
7p14.1	7:37905932-37916817	SFRP4, FRPHE, PYL	Secreted frizzled-related protein 4	606570	SFRP4	6424	ENSG00000106483,ENST00000436072;;;ENST00000436072		Pyle disease	265900	AR	3	Sfrp4
7p13	7:44062727-44065567	PGAM2, PGAMM, GSD10	Phosphoglycerate mutase, muscle form	612931	PGAM2	5224	ENSG00000164708,ENST00000297283;;;ENST00000297283		Glycogen storage disease X	261670	AR	3	Pgam2
7p11.2	7:56101573-56106476	CHCHD2, PARK22	Coiled-coil-helix-coiled-coil-helix domain-containing protein 2	616244	CHCHD2	51142	ENSG00000106153,ENST00000395422;;;ENST00000395422		Parkinson disease 22, autosomal dominant	616710	AD	3	Chchd2,Chchd2-ps
7q11.23	7:74774011-74789315	NCF1, CGD1	Neutrophil cytosolic factor-1, 47kD	608512	NCF1	653361	ENSG00000158517,ENST00000289473;;;ENST00000289473		Chronic granulomatous disease 1, autosomal recessive	233700	AR	3	Ncf1
7q11.23	7:76302673-76304292	HSPB1, HSP27, CMT2F, HMND3	Heat-shock 27kD protein-1	602195	HSPB1	3315	ENSG00000106211,ENST00000248553;;;ENST00000248553		Charcot-Marie-Tooth disease, axonal, type 2F	606595	AD	3	Hspb1
7q11.23	7:76302673-76304292	HSPB1, HSP27, CMT2F, HMND3	Heat-shock 27kD protein-1	602195	HSPB1	3315	ENSG00000106211,ENST00000248553;;;ENST00000248553		Neuronopathy, distal hereditary motor, autosomal dominant 3	608634	AD	3	Hspb1
7q21.11	7:80602207-80679274	CD36, CHDS7, BDPLT10	CD36 antigen (collagen type I)	173510	CD36	948	ENSG00000135218,ENST00000447544;;;ENST00000447544		{Coronary heart disease, susceptibility to, 7}	610938		3	Cd36
7q21.11	7:80602207-80679274	CD36, CHDS7, BDPLT10	CD36 antigen (collagen type I)	173510	CD36	948	ENSG00000135218,ENST00000447544;;;ENST00000447544		{Malaria, cerebral, reduced risk of}	611162		3	Cd36
7q21.11	7:80602207-80679274	CD36, CHDS7, BDPLT10	CD36 antigen (collagen type I)	173510	CD36	948	ENSG00000135218,ENST00000447544;;;ENST00000447544		{Malaria, cerebral, susceptibility to}	611162		3	Cd36
7q21.11	7:80602207-80679274	CD36, CHDS7, BDPLT10	CD36 antigen (collagen type I)	173510	CD36	948	ENSG00000135218,ENST00000447544;;;ENST00000447544		Platelet glycoprotein IV deficiency	608404	AR	3	Cd36
7q21.12	7:87365896-87476027	ABCB4, PGY3, MDR3, ICP3	ATP-binding cassette, subfamily B, member 4 (P-glycoprotein-3/multiple drug resistance-3)	171060	ABCB4	5244	ENSG00000005471,ENST00000649586;;;ENST00000649586	within 500kb of MDR1	Cholestasis, intrahepatic, of pregnancy, 3	614972	AD, AR	3	Abcb4
7q21.12	7:87365896-87476027	ABCB4, PGY3, MDR3, ICP3	ATP-binding cassette, subfamily B, member 4 (P-glycoprotein-3/multiple drug resistance-3)	171060	ABCB4	5244	ENSG00000005471,ENST00000649586;;;ENST00000649586	within 500kb of MDR1	Cholestasis, progressive familial intrahepatic 3	602347	AR	3	Abcb4
7q21.12	7:87365896-87476027	ABCB4, PGY3, MDR3, ICP3	ATP-binding cassette, subfamily B, member 4 (P-glycoprotein-3/multiple drug resistance-3)	171060	ABCB4	5244	ENSG00000005471,ENST00000649586;;;ENST00000649586	within 500kb of MDR1	Gallbladder disease 1	600803	AD, AR	3	Abcb4
7q21.12	7:87503017-87713295	ABCB1, PGY1, MDR1, IBD13, CLCs	ATP-binding cassette, subfamily B, member 1 (P-glycoprotein-1/multiple drug resistance-1)	171050	ABCB1	5243	ENSG00000085563,ENST00000622132;;;ENST00000622132		{Colchicine resistance}	120080		3	Abcb1a,Abcb1b
7q21.12	7:87503017-87713295	ABCB1, PGY1, MDR1, IBD13, CLCs	ATP-binding cassette, subfamily B, member 1 (P-glycoprotein-1/multiple drug resistance-1)	171050	ABCB1	5243	ENSG00000085563,ENST00000622132;;;ENST00000622132		{Inflammatory bowel disease 13}	612244		3	Abcb1a,Abcb1b
7q21.3	7:95297676-95324532	PON1, PON, ESA, MVCD5	Paraoxonase-1	168820	PON1	5444	ENSG00000005421,ENST00000222381;;;ENST00000222381		{Coronary artery disease, susceptibility to}			3	Pon1
7q21.3	7:95297676-95324532	PON1, PON, ESA, MVCD5	Paraoxonase-1	168820	PON1	5444	ENSG00000005421,ENST00000222381;;;ENST00000222381		{Coronary artery spasm 2, susceptibility to}			3	Pon1
7q21.3	7:95297676-95324532	PON1, PON, ESA, MVCD5	Paraoxonase-1	168820	PON1	5444	ENSG00000005421,ENST00000222381;;;ENST00000222381		{Microvascular complications of diabetes 5}	612633		3	Pon1
7q21.3	7:95297676-95324532	PON1, PON, ESA, MVCD5	Paraoxonase-1	168820	PON1	5444	ENSG00000005421,ENST00000222381;;;ENST00000222381		{Organophosphate poisoning, sensitivity to}			3	Pon1
7q21.3	7:95404862-95435028	PON2	Paraoxonase-2	602447	PON2	5445	ENSG00000105854,ENST00000222572;;;ENST00000222572		{Coronary artery disease, susceptibility to}			3	Pon2
7q22	7:98400001-107800000	IBD11	Inflammatory bowel disease 11	191390	IBD11	100529151		associated with MUC3A	{Inflammatory bowel disease 11}	191390	Mu	2
7q22.1	7:99374259-99394816	ARPC1B, ARC41, IMD71	Actin-related protein 2/3 complex, subunit 1B	604223	ARPC1B	10095	ENSG00000130429,ENST00000646101;;;ENST00000646101		Immunodeficiency 71 with inflammatory disease and congenital thrombocytopenia	617718	AR	3	Arpc1b
7q22.3	7:105532201-105567677	RINT1, ILFS3	RAD50-interacting protein 1	610089	RINT1	60561	ENSG00000135249,ENST00000257700;;;ENST00000257700		Infantile liver failure syndrome 3	618641	AR	3	Rint1
7q32.1	7:128937032-128950038	IRF5, IBD14, SLEB10	Interferon regulatory factor 5	607218	IRF5	3663	ENSG00000128604,ENST00000357234;;;ENST00000357234		{Inflammatory bowel disease 14}	612245		3	Irf5
7q32.1	7:128937032-128950038	IRF5, IBD14, SLEB10	Interferon regulatory factor 5	607218	IRF5	3663	ENSG00000128604,ENST00000357234;;;ENST00000357234		{Systemic lupus erythematosus, susceptibility to, 10}	612251		3	Irf5
7q36	7:148200001-159345973	AD10	Alzheimer disease-10	609636	AD10	780912		max lod with D7S798	Alzheimer disease-10	609636	AD	2
7q36.1	7:150991017-151014588	NOS3	Nitric oxide synthase 3, endothelial cell	163729	NOS3	4846	ENSG00000164867,ENST00000297494;;;ENST00000297494		{Alzheimer disease, late-onset, susceptibility to}	104300	AD	3	Nos3
7q36.1	7:150991017-151014588	NOS3	Nitric oxide synthase 3, endothelial cell	163729	NOS3	4846	ENSG00000164867,ENST00000297494;;;ENST00000297494		{Coronary artery spasm 1, susceptibility to}			3	Nos3
7q36.1	7:150991017-151014588	NOS3	Nitric oxide synthase 3, endothelial cell	163729	NOS3	4846	ENSG00000164867,ENST00000297494;;;ENST00000297494		{Hypertension, pregnancy-induced}	189800	AD	3	Nos3
7q36.1	7:150991017-151014588	NOS3	Nitric oxide synthase 3, endothelial cell	163729	NOS3	4846	ENSG00000164867,ENST00000297494;;;ENST00000297494		{Hypertension, susceptibility to}	145500	Mu	3	Nos3
7q36.1	7:150991017-151014588	NOS3	Nitric oxide synthase 3, endothelial cell	163729	NOS3	4846	ENSG00000164867,ENST00000297494;;;ENST00000297494		{Ischemic stroke, susceptibility to}	601367	Mu	3	Nos3
7q36.1	7:150991017-151014588	NOS3	Nitric oxide synthase 3, endothelial cell	163729	NOS3	4846	ENSG00000164867,ENST00000297494;;;ENST00000297494		{Placental abruption}			3	Nos3
7q36.1	7:151556127-151877115	PRKAG2, WPWS, CMH6	Protein kinase, AMP-activated, noncatalytic, gamma-2	602743	PRKAG2	51422	ENSG00000106617,ENST00000287878;;;ENST00000287878		Cardiomyopathy, hypertrophic 6	600858	AD	3	Prkag2
7q36.1	7:151556127-151877115	PRKAG2, WPWS, CMH6	Protein kinase, AMP-activated, noncatalytic, gamma-2	602743	PRKAG2	51422	ENSG00000106617,ENST00000287878;;;ENST00000287878		Glycogen storage disease of heart, lethal congenital	261740	AD	3	Prkag2
7q36.1	7:151556127-151877115	PRKAG2, WPWS, CMH6	Protein kinase, AMP-activated, noncatalytic, gamma-2	602743	PRKAG2	51422	ENSG00000106617,ENST00000287878;;;ENST00000287878		Wolff-Parkinson-White syndrome	194200	AD	3	Prkag2
Chr.7	7:1-159345973	AIS2, VAMAS3	Autoimmune disease, susceptibility to, 2	608391	AIS2	378426			{Autoimmune disease, susceptibility to, 2}	608391		2
8p23.1	8:11676935-11760002	GATA4, ASD2, VSD1, TACHD, TOF	GATA-binding protein-4	600576	GATA4	2626	ENSG00000136574,ENST00000532059;;;ENST00000532059	mutations identified in 1 TACHD family	?Testicular anomalies with or without congenital heart disease	615542	AD	3	Gata4
8p23.1	8:11676935-11760002	GATA4, ASD2, VSD1, TACHD, TOF	GATA-binding protein-4	600576	GATA4	2626	ENSG00000136574,ENST00000532059;;;ENST00000532059	mutations identified in 1 TACHD family	Atrial septal defect 2	607941	AD	3	Gata4
8p23.1	8:11676935-11760002	GATA4, ASD2, VSD1, TACHD, TOF	GATA-binding protein-4	600576	GATA4	2626	ENSG00000136574,ENST00000532059;;;ENST00000532059	mutations identified in 1 TACHD family	Atrioventricular septal defect 4	614430	AD	3	Gata4
8p23.1	8:11676935-11760002	GATA4, ASD2, VSD1, TACHD, TOF	GATA-binding protein-4	600576	GATA4	2626	ENSG00000136574,ENST00000532059;;;ENST00000532059	mutations identified in 1 TACHD family	Tetralogy of Fallot	187500	AD	3	Gata4
8p23.1	8:11676935-11760002	GATA4, ASD2, VSD1, TACHD, TOF	GATA-binding protein-4	600576	GATA4	2626	ENSG00000136574,ENST00000532059;;;ENST00000532059	mutations identified in 1 TACHD family	Ventricular septal defect 1	614429	AD	3	Gata4
8p22	8:12800001-19200000	CHDS9	Coronary heart disease, susceptibility to, 9	612030	CHDS9	100188877		max lod at D8S1106	{Coronary heart disease, susceptibility to, 9}	612030		2
8p21.2	8:24950955-24956612	NEFL, CMT2E, CMT1F, CMTDIG	Neurofilament, light polypeptide	162280	NEFL	4747	ENSG00000277586,ENST00000610854;;;ENST00000610854		Charcot-Marie-Tooth disease, dominant intermediate G	617882	AD	3	Nefl
8p21.2	8:24950955-24956612	NEFL, CMT2E, CMT1F, CMTDIG	Neurofilament, light polypeptide	162280	NEFL	4747	ENSG00000277586,ENST00000610854;;;ENST00000610854		Charcot-Marie-Tooth disease, type 1F	607734	AD, AR	3	Nefl
8p21.2	8:24950955-24956612	NEFL, CMT2E, CMT1F, CMTDIG	Neurofilament, light polypeptide	162280	NEFL	4747	ENSG00000277586,ENST00000610854;;;ENST00000610854		Charcot-Marie-Tooth disease, type 2E	607684	AD	3	Nefl
8p12-q22	8:29000001-105100000	AD12	Alzheimer disease 12	611073	AD12	100188830		max lod at D8S1119	{Alzheimer disease 12}	611073		2
8q12.1	8:55879835-56014169	LYN, SAIDV	LYN protooncogene, SRC family tyrosine kinase	165120	LYN	4067	ENSG00000254087,ENST00000519728;;;ENST00000519728		Autoinflammatory disease, systemic, with vasculitis	620376	AD	3	Lyn
8q13-q23	8:65100001-116700000	CMT2H	Charcot-Marie-Tooth disease, axonal, type 2H	607731	CMT2H	619496		between D8S1807 and D8S548	Charcot-Marie-Tooth disease, axonal, type 2H	607731	AR	2
8q21.11	8:74234700-74321540	JPH1, JP1, CMT2K	Junctophilin 1	605266	JPH1	56704	ENSG00000104369,ENST00000342232;;;ENST00000342232	mutation identified in 1 CMT2Km family	?Charcot-Marie-Tooth disease, axonal, autosomal dominant, type 2K, modifier of	607831	AD, AR	3	Jph1
8q21.11	8:74350403-74488872	GDAP1, CMT4A, CMT2K, CMTRIA	Ganglioside-induced differentiation-associated protein 1	606598	GDAP1	54332	ENSG00000104381,ENST00000220822;;;ENST00000220822		Charcot-Marie-Tooth disease, axonal, type 2K	607831	AD, AR	3	Gdap1
8q21.11	8:74350403-74488872	GDAP1, CMT4A, CMT2K, CMTRIA	Ganglioside-induced differentiation-associated protein 1	606598	GDAP1	54332	ENSG00000104381,ENST00000220822;;;ENST00000220822		Charcot-Marie-Tooth disease, axonal, with vocal cord paresis	607706	AR	3	Gdap1
8q21.11	8:74350403-74488872	GDAP1, CMT4A, CMT2K, CMTRIA	Ganglioside-induced differentiation-associated protein 1	606598	GDAP1	54332	ENSG00000104381,ENST00000220822;;;ENST00000220822		Charcot-Marie-Tooth disease, recessive intermediate, A	608340	AR	3	Gdap1
8q21.11	8:74350403-74488872	GDAP1, CMT4A, CMT2K, CMTRIA	Ganglioside-induced differentiation-associated protein 1	606598	GDAP1	54332	ENSG00000104381,ENST00000220822;;;ENST00000220822		Charcot-Marie-Tooth disease, type 4A	214400	AR	3	Gdap1
8q21.13	8:81440326-81447439	PMP2, CMT1G	Peripheral myelin protein-2	170715	PMP2	5375	ENSG00000147588,ENST00000256103;;;ENST00000256103		Charcot-Marie-Tooth disease, demyelinating, type 1G	618279	AD	3	Pmp2
8q22.1	8:94127162-94217278	CDH17, CDH16, HPT1	Cadherin-17, liver-intestine	603017	CDH17	1015	ENSG00000079112,ENST00000027335;;;ENST00000027335					Cdh17
8q23	8:105100001-116700000	MYMY3	Moyamoya disease 3	608796	MYMY3	493818		max lod at D8S546	Moyamoya disease 3	608796		2
8q24.12	8:118923557-118951885	TNFRSF11B, OPG, OCIF, PDB5	Tumor necrosis factor receptor superfamily, member 11B (osteoprotegerin)	602643	TNFRSF11B	4982	ENSG00000164761,ENST00000297350;;;ENST00000297350		Paget disease of bone 5, juvenile-onset	239000	AR	3	Tnfrsf11b
8q24.22	8:132866958-133134899	TG, AITD3, TDH3	Thyroglobulin	188450	TG	7038	ENSG00000042832,ENST00000220616;;;ENST00000220616	distal to MYC	{Autoimmune thyroid disease, susceptibility to, 3}	608175		3	Tg
8q24.22	8:132866958-133134899	TG, AITD3, TDH3	Thyroglobulin	188450	TG	7038	ENSG00000042832,ENST00000220616;;;ENST00000220616	distal to MYC	Thyroid dyshormonogenesis 3	274700	AR	3	Tg
8q24.22	8:133237175-133297252	NDRG1, HMSNL, CMT4D	N-myc downstream-regulated gene 1	605262	NDRG1	10397	ENSG00000104419,ENST00000323851;;;ENST00000323851		Charcot-Marie-Tooth disease, type 4D	601455	AR	3	Ndrg1
8q24.22	8:134477788-134832339	ZFAT1, ZNF406, AITD3	Zinc finger gene in autoimmune thyroid disease 1	610931	ZFAT	57623	ENSG00000066827,ENST00000377838;;;ENST00000377838		{Autoimmune thyroid disease, susceptibility to, 3}	608175		3	Zfat
8q24.3	8:142740949-142742406	SLURP1, MDM	Secreted LY6/uPAR-related protein 1	606119	SLURP1	57152	ENSG00000126233,ENST00000246515;;;ENST00000246515		Meleda disease	248300	AR	3	Slurp1
Chr.8	8:1-145138636	AIS3, VAMAS4	Autoimmune disease, susceptibility to, 3	608392	AIS3	378427			{Autoimmune disease, susceptibility to, 3}	608392		2
9p22.1	9:18500001-19900000	AD11	Alzheimer disease 11	609790	AD11	100188795		between D9S157 and D9S259	Alzheimer disease-11	609790		2
9p21	9:19900001-33200000	CHDS8	Coronary heart disease, susceptibility to, 8	611139	CHDS8	100188836		strongest linkage with dbSNP rs1333049	{Coronary heart disease, susceptibility to, 8}	611139		2
9p21.3	9:20655625-20995950	FOCAD, KIAA1797, SCOLIV	Focadhesin	614606	FOCAD	54914	ENSG00000188352,ENST00000338382;;;ENST00000338382		Liver disease, severe congenital	619991	AR	3	Focad
9p13.3	9:35056064-35072625	VCP, IBMPFD1, CMT2Y, FTDALS6	Valosin-containing protein	601023	VCP	7415	ENSG00000165280,ENST00000358901;;;ENST00000358901		Charcot-Marie-Tooth disease, type 2Y	616687	AD	3	Vcp
9p13.3	9:35056064-35072625	VCP, IBMPFD1, CMT2Y, FTDALS6	Valosin-containing protein	601023	VCP	7415	ENSG00000165280,ENST00000358901;;;ENST00000358901		Frontotemporal dementia and/or amyotrophic lateral sclerosis 6	613954	AD	3	Vcp
9p13.3	9:35056064-35072625	VCP, IBMPFD1, CMT2Y, FTDALS6	Valosin-containing protein	601023	VCP	7415	ENSG00000165280,ENST00000358901;;;ENST00000358901		Inclusion body myopathy with early-onset Paget disease and frontotemporal dementia 1	167320	AD	3	Vcp
1p36	1:1-27600000	DEL1p36, C1DELp36	Chromosome 1p36 deletion syndrome, distal	607872				contiguous gene deletion syndrome	Chromosome 1p36 deletion syndrome, distal	607872	IC	4
1p36.21	1:15438443-15449242	CTRC, CLCR	Chymotrypsin	601405	CTRC	11330	ENSG00000162438,ENST00000375949;;;ENST00000375949		{Pancreatitis, chronic, susceptibility to}	167800	AD	3	Ctrc
1p13.3	1:109687817-109693745	GSTM1	Glutathione S-transferase M1	138350	GSTM1	2944	ENSG00000134184,ENST00000309851;;;ENST00000309851					Gstm1,Gstm2,Gstm3,Gstm6
1q32.1	1:206767602-206772494	IL10, CSIF, GVHDS	Interleukin-10	124092	IL10	3586	ENSG00000136634,ENST00000423557;;;ENST00000423557		{Graft-versus-host disease, protection against}	614395		3	Il10
1q32.1	1:206767602-206772494	IL10, CSIF, GVHDS	Interleukin-10	124092	IL10	3586	ENSG00000136634,ENST00000423557;;;ENST00000423557		{HIV-1, susceptibility to}	609423		3	Il10
1q32.1	1:206767602-206772494	IL10, CSIF, GVHDS	Interleukin-10	124092	IL10	3586	ENSG00000136634,ENST00000423557;;;ENST00000423557		{Rheumatoid arthritis, progression of}	180300		3	Il10
2p21	2:45651279-46187990	PRKCE, PKCE	Protein kinase C, epsilon	176975	PRKCE	5581	ENSG00000171132,ENST00000306156;;;ENST00000306156					Prkce
2p14	2:66435125-66573869	MEIS1	Meis homeobox 1	601739	MEIS1	4211	ENSG00000143995,ENST00000272369;;;ENST00000272369					Meis1
2p12	2:75046463-75199520	TACR1, TAC1R, NK1R	Tachykinin receptor 1 (substance P receptor; neurokinin-1 receptor)	162323	TACR1	6869	ENSG00000115353,ENST00000305249;;;ENST00000305249					Tacr1
2q33.1	2:201233463-201287711	CASP8, MCH5, ALPS2B	Caspase 8, apoptosis-related cysteine protease	601763	CASP8	841	ENSG00000064012,ENST00000673742;;;ENST00000673742	mutation identified in 1 CEDS family	?Caspase 8 lymphadenopathy syndrome	607271	AR	3	Casp8
2q33.1	2:201233463-201287711	CASP8, MCH5, ALPS2B	Caspase 8, apoptosis-related cysteine protease	601763	CASP8	841	ENSG00000064012,ENST00000673742;;;ENST00000673742	mutation identified in 1 CEDS family	{Breast cancer, protection against}	114480	AD, SMu	3	Casp8
2q33.1	2:201233463-201287711	CASP8, MCH5, ALPS2B	Caspase 8, apoptosis-related cysteine protease	601763	CASP8	841	ENSG00000064012,ENST00000673742;;;ENST00000673742	mutation identified in 1 CEDS family	{Lung cancer, protection against}	211980	AD, SMu	3	Casp8
2q33.1	2:201233463-201287711	CASP8, MCH5, ALPS2B	Caspase 8, apoptosis-related cysteine protease	601763	CASP8	841	ENSG00000064012,ENST00000673742;;;ENST00000673742	mutation identified in 1 CEDS family	Hepatocellular carcinoma, somatic	114550		3	Casp8
2q35	2:218270519-218346793	PNKD, R1, TAHCCP2, KIPP1184, BRP17, FPD1, PDC, DYT8	PNKD metallo-beta-lactamase domain-containing protein	609023	PNKD	25953	ENSG00000127838,ENST00000273077;;;ENST00000273077		Paroxysmal nonkinesigenic dyskinesia 1	118800	AD	3	Pnkd
2q35	2:218382273-218396894	NRAMP1, NRAMP, SLC11A1	Solute carrier family 11 (proton-coupled divalent metal ion transporter), member 1	600266	SLC11A1	6556	ENSG00000018280,ENST00000233202;;;ENST00000233202	within 220 kb of VIL1	{Buruli ulcer, susceptibility to}	610446		3	Slc11a1
2q35	2:218382273-218396894	NRAMP1, NRAMP, SLC11A1	Solute carrier family 11 (proton-coupled divalent metal ion transporter), member 1	600266	SLC11A1	6556	ENSG00000018280,ENST00000233202;;;ENST00000233202	within 220 kb of VIL1	{Mycobacterium tuberculosis, susceptibility to infection by}	607948		3	Slc11a1
2q37.3	2:238244044-238300065	PER2, FASPS1, KIAA0347	Period circadian regulator 2	603426	PER2	8864	ENSG00000132326,ENST00000254657;;;ENST00000254657	mutation identified in 1 FASPS1 family	?Advanced sleep phase syndrome, familial, 1	604348	AD	3	Per2
3p22.1	3:41199505-41240443	CTNNB1, NEDSDV, EVR7	Catenin (cadherin-associated protein), beta 1, 88kD	116806	CTNNB1	1499	ENSG00000168036,ENST00000349496;;;ENST00000349496		Colorectal cancer, somatic	114500		3	Ctnnb1
3p22.1	3:41199505-41240443	CTNNB1, NEDSDV, EVR7	Catenin (cadherin-associated protein), beta 1, 88kD	116806	CTNNB1	1499	ENSG00000168036,ENST00000349496;;;ENST00000349496		Exudative vitreoretinopathy 7	617572	AD	3	Ctnnb1
3p22.1	3:41199505-41240443	CTNNB1, NEDSDV, EVR7	Catenin (cadherin-associated protein), beta 1, 88kD	116806	CTNNB1	1499	ENSG00000168036,ENST00000349496;;;ENST00000349496		Hepatocellular carcinoma, somatic	114550		3	Ctnnb1
3p22.1	3:41199505-41240443	CTNNB1, NEDSDV, EVR7	Catenin (cadherin-associated protein), beta 1, 88kD	116806	CTNNB1	1499	ENSG00000168036,ENST00000349496;;;ENST00000349496		Medulloblastoma, somatic	155255		3	Ctnnb1
3p22.1	3:41199505-41240443	CTNNB1, NEDSDV, EVR7	Catenin (cadherin-associated protein), beta 1, 88kD	116806	CTNNB1	1499	ENSG00000168036,ENST00000349496;;;ENST00000349496		Neurodevelopmental disorder with spastic diplegia and visual defects	615075	AD	3	Ctnnb1
3p22.1	3:41199505-41240443	CTNNB1, NEDSDV, EVR7	Catenin (cadherin-associated protein), beta 1, 88kD	116806	CTNNB1	1499	ENSG00000168036,ENST00000349496;;;ENST00000349496		Ovarian cancer, somatic	167000		3	Ctnnb1
3p22.1	3:41199505-41240443	CTNNB1, NEDSDV, EVR7	Catenin (cadherin-associated protein), beta 1, 88kD	116806	CTNNB1	1499	ENSG00000168036,ENST00000349496;;;ENST00000349496		Pilomatricoma, somatic	132600		3	Ctnnb1
3q13.2	3:111998922-112013885	TAGLN3, NP24, NP22	Transgelin 3	607953	TAGLN3	29114	ENSG00000144834,ENST00000478951;;;ENST00000478951					Tagln3
3q25.33	3:159300001-161000000	PBC1	Biliary cirrhosis, primary, 1	109720				associated with rs6441286 and rs574808	Biliary cirrhosis, primary, 1	109720	AD	2
3q26.32	3:179148126-179240093	PIK3CA, CLOVE, MCAP, MCM, MCMTC, CWS5, CLAPO, CCM4, HMH	Phosphatidylinositol 3-kinase, catalytic, alpha polypeptide	171834	PIK3CA	5290	ENSG00000121879,ENST00000263967;;;ENST00000263967		Breast cancer, somatic	114480		3	Pik3ca
3q26.32	3:179148126-179240093	PIK3CA, CLOVE, MCAP, MCM, MCMTC, CWS5, CLAPO, CCM4, HMH	Phosphatidylinositol 3-kinase, catalytic, alpha polypeptide	171834	PIK3CA	5290	ENSG00000121879,ENST00000263967;;;ENST00000263967		Cerebral cavernous malformations 4, somatic	619538		3	Pik3ca
3q26.32	3:179148126-179240093	PIK3CA, CLOVE, MCAP, MCM, MCMTC, CWS5, CLAPO, CCM4, HMH	Phosphatidylinositol 3-kinase, catalytic, alpha polypeptide	171834	PIK3CA	5290	ENSG00000121879,ENST00000263967;;;ENST00000263967		CLAPO syndrome, somatic	613089		3	Pik3ca
3q26.32	3:179148126-179240093	PIK3CA, CLOVE, MCAP, MCM, MCMTC, CWS5, CLAPO, CCM4, HMH	Phosphatidylinositol 3-kinase, catalytic, alpha polypeptide	171834	PIK3CA	5290	ENSG00000121879,ENST00000263967;;;ENST00000263967		CLOVE syndrome, somatic	612918		3	Pik3ca
3q26.32	3:179148126-179240093	PIK3CA, CLOVE, MCAP, MCM, MCMTC, CWS5, CLAPO, CCM4, HMH	Phosphatidylinositol 3-kinase, catalytic, alpha polypeptide	171834	PIK3CA	5290	ENSG00000121879,ENST00000263967;;;ENST00000263967		Colorectal cancer, somatic	114500		3	Pik3ca
3q26.32	3:179148126-179240093	PIK3CA, CLOVE, MCAP, MCM, MCMTC, CWS5, CLAPO, CCM4, HMH	Phosphatidylinositol 3-kinase, catalytic, alpha polypeptide	171834	PIK3CA	5290	ENSG00000121879,ENST00000263967;;;ENST00000263967		Cowden syndrome 5	615108		3	Pik3ca
3q26.32	3:179148126-179240093	PIK3CA, CLOVE, MCAP, MCM, MCMTC, CWS5, CLAPO, CCM4, HMH	Phosphatidylinositol 3-kinase, catalytic, alpha polypeptide	171834	PIK3CA	5290	ENSG00000121879,ENST00000263967;;;ENST00000263967		Gastric cancer, somatic	613659		3	Pik3ca
3q26.32	3:179148126-179240093	PIK3CA, CLOVE, MCAP, MCM, MCMTC, CWS5, CLAPO, CCM4, HMH	Phosphatidylinositol 3-kinase, catalytic, alpha polypeptide	171834	PIK3CA	5290	ENSG00000121879,ENST00000263967;;;ENST00000263967		Hemifacial myohyperplasia, somatic	606773		3	Pik3ca
3q26.32	3:179148126-179240093	PIK3CA, CLOVE, MCAP, MCM, MCMTC, CWS5, CLAPO, CCM4, HMH	Phosphatidylinositol 3-kinase, catalytic, alpha polypeptide	171834	PIK3CA	5290	ENSG00000121879,ENST00000263967;;;ENST00000263967		Hepatocellular carcinoma, somatic	114550		3	Pik3ca
3q26.32	3:179148126-179240093	PIK3CA, CLOVE, MCAP, MCM, MCMTC, CWS5, CLAPO, CCM4, HMH	Phosphatidylinositol 3-kinase, catalytic, alpha polypeptide	171834	PIK3CA	5290	ENSG00000121879,ENST00000263967;;;ENST00000263967		Keratosis, seborrheic, somatic	182000		3	Pik3ca
3q26.32	3:179148126-179240093	PIK3CA, CLOVE, MCAP, MCM, MCMTC, CWS5, CLAPO, CCM4, HMH	Phosphatidylinositol 3-kinase, catalytic, alpha polypeptide	171834	PIK3CA	5290	ENSG00000121879,ENST00000263967;;;ENST00000263967		Macrodactyly, somatic	155500		3	Pik3ca
3q26.32	3:179148126-179240093	PIK3CA, CLOVE, MCAP, MCM, MCMTC, CWS5, CLAPO, CCM4, HMH	Phosphatidylinositol 3-kinase, catalytic, alpha polypeptide	171834	PIK3CA	5290	ENSG00000121879,ENST00000263967;;;ENST00000263967		Megalencephaly-capillary malformation-polymicrogyria syndrome, somatic	602501		3	Pik3ca
3q26.32	3:179148126-179240093	PIK3CA, CLOVE, MCAP, MCM, MCMTC, CWS5, CLAPO, CCM4, HMH	Phosphatidylinositol 3-kinase, catalytic, alpha polypeptide	171834	PIK3CA	5290	ENSG00000121879,ENST00000263967;;;ENST00000263967		Nevus, epidermal, somatic	162900		3	Pik3ca
3q26.32	3:179148126-179240093	PIK3CA, CLOVE, MCAP, MCM, MCMTC, CWS5, CLAPO, CCM4, HMH	Phosphatidylinositol 3-kinase, catalytic, alpha polypeptide	171834	PIK3CA	5290	ENSG00000121879,ENST00000263967;;;ENST00000263967		Nonsmall cell lung cancer, somatic	211980		3	Pik3ca
3q26.32	3:179148126-179240093	PIK3CA, CLOVE, MCAP, MCM, MCMTC, CWS5, CLAPO, CCM4, HMH	Phosphatidylinositol 3-kinase, catalytic, alpha polypeptide	171834	PIK3CA	5290	ENSG00000121879,ENST00000263967;;;ENST00000263967		Ovarian cancer, somatic	167000		3	Pik3ca
3q27.3	3:186842710-186858463	ADIPOQ, APM1, GBP28, ADIPQTL1	Adipocyte-, C1q-, and collagen domain-containing	605441	ADIPOQ	9370	ENSG00000181092,ENST00000320741;;;ENST00000320741		Adiponectin deficiency	612556	AD	3	Adipoq
4p12	4:46243548-46390300	GABRA2, DEE78	Gamma-aminobutyric acid (GABA) A receptor, alpha-2	137140	GABRA2	2555	ENSG00000151834,ENST00000381620;;;ENST00000381620		{Alcohol dependence, susceptibility to}	103780	Mu	3	Gabra2
4p12	4:46243548-46390300	GABRA2, DEE78	Gamma-aminobutyric acid (GABA) A receptor, alpha-2	137140	GABRA2	2555	ENSG00000151834,ENST00000381620;;;ENST00000381620		Developmental and epileptic encephalopathy 78	618557	AD	3	Gabra2
4q13.3	4:73436221-73456174	AFP, HPAFP, AFPD	Alpha-fetoprotein	104150	AFP	174	ENSG00000081051,ENST00000395792;;;ENST00000395792	order: 5'-ALB-3'--5'-AFP-3'	[Hereditary persistence of alpha-fetoprotein]	615970	AD	3	Afp
4q13.3	4:73436221-73456174	AFP, HPAFP, AFPD	Alpha-fetoprotein	104150	AFP	174	ENSG00000081051,ENST00000395792;;;ENST00000395792	order: 5'-ALB-3'--5'-AFP-3'	Alpha-fetoprotein deficiency	615969	AR	3	Afp
4q22.1	4:87303794-87322882	HSD17B13, SCDR9, FLDP	17-beta-hydroxysteroid dehydrogenase XIII	612127	HSD17B13	345275	ENSG00000170509,ENST00000328546;;;ENST00000328546		{Fatty liver disease, protection from}	620116	AD	3	Hsd17b13
4q22.1	4:89724099-89838304	SNCA, NACP, PARK1, PARK4	Synuclein, alpha (non A4 component of amyloid precursor)	163890	SNCA	6622	ENSG00000145335,ENST00000394991;;;ENST00000394991		Dementia, Lewy body	127750	AD	3	Snca
4q22.1	4:89724099-89838304	SNCA, NACP, PARK1, PARK4	Synuclein, alpha (non A4 component of amyloid precursor)	163890	SNCA	6622	ENSG00000145335,ENST00000394991;;;ENST00000394991		Parkinson disease 1	168601	AD	3	Snca
4q22.1	4:89724099-89838304	SNCA, NACP, PARK1, PARK4	Synuclein, alpha (non A4 component of amyloid precursor)	163890	SNCA	6622	ENSG00000145335,ENST00000394991;;;ENST00000394991		Parkinson disease 4	605543	AD	3	Snca
4q23	4:99276369-99290985	ADH1A, ADH1	Alcohol dehydrogenase IA (class I), alpha polypeptide	103700	ADH1A	124	ENSG00000187758,ENST00000209668;;;ENST00000209668					Adh1
4q23	4:99304971-99321401	ADH1B, ADH2	Alcohol dehydrogenase IB (class I), beta polypeptide	103720	ADH1B	125	ENSG00000196616,ENST00000305046;;;ENST00000305046		{Aerodigestive tract cancer, squamous cell, alcohol-related, protection against}	103780	Mu	3	Adh1
4q23	4:99304971-99321401	ADH1B, ADH2	Alcohol dehydrogenase IB (class I), beta polypeptide	103720	ADH1B	125	ENSG00000196616,ENST00000305046;;;ENST00000305046		{Alcohol dependence, protection against}	103780	Mu	3	Adh1
4q23	4:99336497-99352746	ADH1C, ADH3	Alcohol dehydrogenase IC (class I), gamma polypeptide	103730	ADH1C	126	ENSG00000248144,ENST00000515683;;;ENST00000515683		{Alcohol dependence, protection against}	103780	Mu	3	Adh1
4q23	4:99336497-99352746	ADH1C, ADH3	Alcohol dehydrogenase IC (class I), gamma polypeptide	103730	ADH1C	126	ENSG00000248144,ENST00000515683;;;ENST00000515683		{Parkinson disease, susceptibility to}	168600	AD, Mu	3	Adh1
4q25	4:109664388-109709767	CASP6, MCH2	Caspase 6, apoptosis-related cysteine protease	601532	CASP6	839	ENSG00000138794,ENST00000265164;;;ENST00000265164					Casp6
4q25	4:109912883-110013766	EGF, URG, HOMG4	Epidermal growth factor (urogastrone)	131530	EGF	1950	ENSG00000138798,ENST00000265171;;;ENST00000265171	mutation identified in 1 HOMG4 family	?Hypomagnesemia 4, renal	611718	AR	3	Egf
5p15.33	5:1392794-1445440	SLC6A3, DAT1, PKDYS1	Solute carrier family 6 (neurotransmitter transporter, dopamine), member 3	126455	SLC6A3	6531	ENSG00000142319,ENST00000270349;;;ENST00000270349		{Nicotine dependence, protection against}	188890		3	Slc6a3
5p15.33	5:1392794-1445440	SLC6A3, DAT1, PKDYS1	Solute carrier family 6 (neurotransmitter transporter, dopamine), member 3	126455	SLC6A3	6531	ENSG00000142319,ENST00000270349;;;ENST00000270349		Parkinsonism-dystonia, infantile, 1	613135	AR	3	Slc6a3
5q22.2	5:112707498-112846239	APC, GS, FPC, BTPS2, DESMD	APC regulator of WNT signaling pathway	611731	APC	324	ENSG00000134982,ENST00000257430;;;ENST00000257430	150kb distal to MCC	Adenoma, periampullary, somatic	175100		3	Apc
5q22.2	5:112707498-112846239	APC, GS, FPC, BTPS2, DESMD	APC regulator of WNT signaling pathway	611731	APC	324	ENSG00000134982,ENST00000257430;;;ENST00000257430	150kb distal to MCC	Adenomatous polyposis coli	175100	AD	3	Apc
5q22.2	5:112707498-112846239	APC, GS, FPC, BTPS2, DESMD	APC regulator of WNT signaling pathway	611731	APC	324	ENSG00000134982,ENST00000257430;;;ENST00000257430	150kb distal to MCC	Brain tumor-polyposis syndrome 2	175100	AD	3	Apc
5q22.2	5:112707498-112846239	APC, GS, FPC, BTPS2, DESMD	APC regulator of WNT signaling pathway	611731	APC	324	ENSG00000134982,ENST00000257430;;;ENST00000257430	150kb distal to MCC	Colorectal cancer, somatic	114500		3	Apc
5q22.2	5:112707498-112846239	APC, GS, FPC, BTPS2, DESMD	APC regulator of WNT signaling pathway	611731	APC	324	ENSG00000134982,ENST00000257430;;;ENST00000257430	150kb distal to MCC	Desmoid disease, hereditary	135290	AD	3	Apc
5q22.2	5:112707498-112846239	APC, GS, FPC, BTPS2, DESMD	APC regulator of WNT signaling pathway	611731	APC	324	ENSG00000134982,ENST00000257430;;;ENST00000257430	150kb distal to MCC	Gardner syndrome	175100	AD	3	Apc
5q22.2	5:112707498-112846239	APC, GS, FPC, BTPS2, DESMD	APC regulator of WNT signaling pathway	611731	APC	324	ENSG00000134982,ENST00000257430;;;ENST00000257430	150kb distal to MCC	Gastric adenocarcinoma and proximal polyposis of the stomach	619182	AD	3	Apc
5q22.2	5:112707498-112846239	APC, GS, FPC, BTPS2, DESMD	APC regulator of WNT signaling pathway	611731	APC	324	ENSG00000134982,ENST00000257430;;;ENST00000257430	150kb distal to MCC	Gastric cancer, somatic	613659		3	Apc
5q22.2	5:112707498-112846239	APC, GS, FPC, BTPS2, DESMD	APC regulator of WNT signaling pathway	611731	APC	324	ENSG00000134982,ENST00000257430;;;ENST00000257430	150kb distal to MCC	Hepatoblastoma, somatic	114550		3	Apc
5q32	5:147824582-147839196	SPINK1, PSTI, PCTT, TATI, TCP	Serine protease inhibitor, Kazal type I (pancreatic secretory trypsin inhibitor)	167790	SPINK1	6690	ENSG00000164266,ENST00000296695;;;ENST00000296695		{Fibrocalculous pancreatic diabetes, susceptibility to}	608189	AD, AR	3	Spink1
5q32	5:147824582-147839196	SPINK1, PSTI, PCTT, TATI, TCP	Serine protease inhibitor, Kazal type I (pancreatic secretory trypsin inhibitor)	167790	SPINK1	6690	ENSG00000164266,ENST00000296695;;;ENST00000296695		Pancreatitis, hereditary	167800	AD	3	Spink1
5q32	5:147824582-147839196	SPINK1, PSTI, PCTT, TATI, TCP	Serine protease inhibitor, Kazal type I (pancreatic secretory trypsin inhibitor)	167790	SPINK1	6690	ENSG00000164266,ENST00000296695;;;ENST00000296695		Tropical calcific pancreatitis	608189	AD, AR	3	Spink1
6p22.3	6:24171755-24383292	DCDC2, RU2, KIAA1154, NPHP19, DFNB66, NSC	Doublecortin domain-containing protein 2	605755	DCDC2	51473	ENSG00000146038,ENST00000378454;;;ENST00000378454	mutation identified in 1 DFNB66 family	?Deafness, autosomal recessive 66	610212	AR	3	Dcdc2a
6p22.3	6:24171755-24383292	DCDC2, RU2, KIAA1154, NPHP19, DFNB66, NSC	Doublecortin domain-containing protein 2	605755	DCDC2	51473	ENSG00000146038,ENST00000378454;;;ENST00000378454	mutation identified in 1 DFNB66 family	Nephronophthisis 19	616217	AR	3	Dcdc2a
6p22.3	6:24171755-24383292	DCDC2, RU2, KIAA1154, NPHP19, DFNB66, NSC	Doublecortin domain-containing protein 2	605755	DCDC2	51473	ENSG00000146038,ENST00000378454;;;ENST00000378454	mutation identified in 1 DFNB66 family	Sclerosing cholangitis, neonatal	617394	AR	3	Dcdc2a
6p22.2	6:26087429-26098343	HFE, HLA-H, HFE1	Homeostatic iron regulator	613609	HFE	3077	ENSG00000010704,ENST00000357618;;;ENST00000357618		Hemochromatosis, type 1	235200	AR	3	Hfe
6q25.3	6:159969082-160111504	IGF2R, MPRI	Insulin-like growth factor-2 receptor (mannose-6-phosphate receptor, cation-independent)	147280	IGF2R	3482	ENSG00000197081,ENST00000356956;;;ENST00000356956	behaves as a tumor suppressor	Hepatocellular carcinoma, somatic	114550		3	Igf2r
7p13	7:43758122-43807342	BLVRA	Biliverdin reductase A	109750	BLVRA	644	ENSG00000106605,ENST00000265523;;;ENST00000265523		Hyperbiliverdinemia	614156	AD, AR	3	Blvra
7q21.3	7:96120220-96322098	SLC25A13, CTLN2, NICCD	Solute carrier family 25 (mitochondrial carrier, citrin), member 13	603859	SLC25A13	10165	ENSG00000004864,ENST00000265631;;;ENST00000265631		Citrullinemia, adult-onset type II	603471	AR	3	Slc25a13
7q21.3	7:96120220-96322098	SLC25A13, CTLN2, NICCD	Solute carrier family 25 (mitochondrial carrier, citrin), member 13	603859	SLC25A13	10165	ENSG00000004864,ENST00000265631;;;ENST00000265631		Citrullinemia, type II, neonatal-onset	605814	AR	3	Slc25a13
7q31.2	7:116672196-116798377	MET, DFNB97, OSFD, DA11	MET protooncogene, receptor tyrosine kinase	164860	MET	4233	ENSG00000105976,ENST00000397752;;;ENST00000397752	mutation identified in 1 DFNB97 family and 1 DA11 family	?Arthrogryposis, distal, type 11	620019	AD	3	Met
7q31.2	7:116672196-116798377	MET, DFNB97, OSFD, DA11	MET protooncogene, receptor tyrosine kinase	164860	MET	4233	ENSG00000105976,ENST00000397752;;;ENST00000397752	mutation identified in 1 DFNB97 family and 1 DA11 family	?Deafness, autosomal recessive 97	616705	AR	3	Met
7q31.2	7:116672196-116798377	MET, DFNB97, OSFD, DA11	MET protooncogene, receptor tyrosine kinase	164860	MET	4233	ENSG00000105976,ENST00000397752;;;ENST00000397752	mutation identified in 1 DFNB97 family and 1 DA11 family	{Osteofibrous dysplasia, susceptibility to}	607278	AD	3	Met
7q31.2	7:116672196-116798377	MET, DFNB97, OSFD, DA11	MET protooncogene, receptor tyrosine kinase	164860	MET	4233	ENSG00000105976,ENST00000397752;;;ENST00000397752	mutation identified in 1 DFNB97 family and 1 DA11 family	Hepatocellular carcinoma, childhood type, somatic	114550		3	Met
7q31.2	7:116672196-116798377	MET, DFNB97, OSFD, DA11	MET protooncogene, receptor tyrosine kinase	164860	MET	4233	ENSG00000105976,ENST00000397752;;;ENST00000397752	mutation identified in 1 DFNB97 family and 1 DA11 family	Renal cell carcinoma, papillary, 1, familial and somatic	605074		3	Met
7q31.2	7:117480025-117668665	CFTR, ABCC7, CF, MRP7	Cystic fibrosis transmembrane conductance regulator (ATP-binding cassette, subfamily C, member 7)	602421	CFTR	1080	ENSG00000001626,ENST00000003084;;;ENST00000003084	distal and 5' to MET	{Bronchiectasis with or without elevated sweat chloride 1, modifier of}	211400	AD	3	Cftr
7q31.2	7:117480025-117668665	CFTR, ABCC7, CF, MRP7	Cystic fibrosis transmembrane conductance regulator (ATP-binding cassette, subfamily C, member 7)	602421	CFTR	1080	ENSG00000001626,ENST00000003084;;;ENST00000003084	distal and 5' to MET	{Hypertrypsinemia, neonatal}			3	Cftr
7q31.2	7:117480025-117668665	CFTR, ABCC7, CF, MRP7	Cystic fibrosis transmembrane conductance regulator (ATP-binding cassette, subfamily C, member 7)	602421	CFTR	1080	ENSG00000001626,ENST00000003084;;;ENST00000003084	distal and 5' to MET	{Pancreatitis, hereditary}	167800	AD	3	Cftr
7q31.2	7:117480025-117668665	CFTR, ABCC7, CF, MRP7	Cystic fibrosis transmembrane conductance regulator (ATP-binding cassette, subfamily C, member 7)	602421	CFTR	1080	ENSG00000001626,ENST00000003084;;;ENST00000003084	distal and 5' to MET	Congenital bilateral absence of vas deferens	277180	AR	3	Cftr
7q31.2	7:117480025-117668665	CFTR, ABCC7, CF, MRP7	Cystic fibrosis transmembrane conductance regulator (ATP-binding cassette, subfamily C, member 7)	602421	CFTR	1080	ENSG00000001626,ENST00000003084;;;ENST00000003084	distal and 5' to MET	Cystic fibrosis	219700	AR	3	Cftr
7q31.2	7:117480025-117668665	CFTR, ABCC7, CF, MRP7	Cystic fibrosis transmembrane conductance regulator (ATP-binding cassette, subfamily C, member 7)	602421	CFTR	1080	ENSG00000001626,ENST00000003084;;;ENST00000003084	distal and 5' to MET	Sweat chloride elevation without CF			3	Cftr
7q31.32	7:122994704-122995700	TAS2R16, T2R16, BGLPT	Taste receptor type 2, member 16	604867	TAS2R16	50833	ENSG00000128519,ENST00000249284;;;ENST00000249284		[Beta-glycopyranoside tasting]	617956	AD	3	Tas2r118
7q31.32	7:122994704-122995700	TAS2R16, T2R16, BGLPT	Taste receptor type 2, member 16	604867	TAS2R16	50833	ENSG00000128519,ENST00000249284;;;ENST00000249284		{Alcohol dependence, susceptibility to}	103780	Mu	3	Tas2r118
7q32.1	7:128241278-128257629	LEP, OB, LEPD	Leptin (murine obesity homolog)	164160	LEP	3952	ENSG00000174697,ENST00000308868;;;ENST00000308868	in mouse cen-Cola-2-Met-ob-Cpa-Tcrb-tel	Obesity, morbid, due to leptin deficiency	614962	AR	3	Lep
7q34	7:142749472-142753072	PRSS1, TRY1	Protease, serine, 1 (trypsin 1)	276000	PRSS1	5644	ENSG00000204983,ENST00000311737;;;ENST00000311737	8 trypsinogen genes embedded in TCRB locus	Pancreatitis, hereditary	167800	AD	3	Prss1,Prss1l,Prss3,Prss3l,Try10,Try4,Try5
7q34	7:142770970-142774560	PRSS2, TRY2	Protease, serine, 2 (trypsin 2)	601564	PRSS2	5645	ENSG00000275896,ENST00000539842;;;ENST00000539842		{Pancreatitis, chronic, protection against}	167800	AD	3	Prss1,Prss1l,Prss2,Prss3,Prss3l,Try10,Try4,Try5
8p22	8:17576433-17643144	PDGFRL, PDGRL, PRLTS	Platelet-derived growth factor receptor-like	604584	PDGFRL	5157	ENSG00000104213,ENST00000251630;;;ENST00000251630		Colorectal cancer, somatic	114500		3	Pdgfrl
8p22	8:17576433-17643144	PDGFRL, PDGRL, PRLTS	Platelet-derived growth factor receptor-like	604584	PDGFRL	5157	ENSG00000104213,ENST00000251630;;;ENST00000251630		Hepatocellular cancer, somatic	114550		3	Pdgfrl
8p21.3	8:19939253-19967259	LPL, LIPD, HDLCQ11	Lipoprotein lipase	609708	LPL	4023	ENSG00000175445,ENST00000650287;;;ENST00000650287		[High density lipoprotein cholesterol level QTL 11]	238600	AR	3	Lpl
8p21.3	8:19939253-19967259	LPL, LIPD, HDLCQ11	Lipoprotein lipase	609708	LPL	4023	ENSG00000175445,ENST00000650287;;;ENST00000650287		Combined hyperlipidemia, familial	144250	AD	3	Lpl
8p21.3	8:19939253-19967259	LPL, LIPD, HDLCQ11	Lipoprotein lipase	609708	LPL	4023	ENSG00000175445,ENST00000650287;;;ENST00000650287		Lipoprotein lipase deficiency	238600	AR	3	Lpl
8p21.3	8:22089150-22104911	FHIP2B, FAI16, RAM160B2	FHF complex subunit hook-interacting protein 2B	620230	FHIP2B	64760	ENSG00000158863,ENST00000289921;;;ENST00000289921					Fhip2b
9p22.3	9:15163622-15307216	TTC39B	Tetratricopeptide repeat domain 39B	613574	TTC39B	158219	ENSG00000155158,ENST00000512701;;;ENST00000512701					Ttc39b
9q21.13	9:72900671-72953053	ALDH1A1	Aldehyde dehydrogenase-1 family, member A1, soluble	100640	ALDH1A1	216	ENSG00000165092,ENST00000297785;;;ENST00000297785					Aldh1a1,Aldh1a7
9q22.33	9:98288109-98708935	GABBR2, GPR51, DEE59, NDPLHS	Gamma-aminobutyric acid B receptor 2	607340	GABBR2	9568	ENSG00000136928,ENST00000259455;;;ENST00000259455		{Nicotine dependence, protection against}	188890		3	Gabbr2
9q22.33	9:98288109-98708935	GABBR2, GPR51, DEE59, NDPLHS	Gamma-aminobutyric acid B receptor 2	607340	GABBR2	9568	ENSG00000136928,ENST00000259455;;;ENST00000259455		{Nicotine dependence, susceptibility to}	188890		3	Gabbr2
9q22.33	9:98288109-98708935	GABBR2, GPR51, DEE59, NDPLHS	Gamma-aminobutyric acid B receptor 2	607340	GABBR2	9568	ENSG00000136928,ENST00000259455;;;ENST00000259455		Developmental and epileptic encephalopathy 59	617904	AD	3	Gabbr2
9q22.33	9:98288109-98708935	GABBR2, GPR51, DEE59, NDPLHS	Gamma-aminobutyric acid B receptor 2	607340	GABBR2	9568	ENSG00000136928,ENST00000259455;;;ENST00000259455		Neurodevelopmental disorder with poor language and loss of hand skills	617903	AD	3	Gabbr2
9q33.1	9:117704403-117724735	TLR4	Toll-like receptor-4	603030	TLR4	7099	ENSG00000136869,ENST00000355622;;;ENST00000355622					Tlr4
10q23.31	10:87863625-87971930	PTEN, MMAC1, GLM2, CWS1	Phosphatase and tensin homolog (mutated in multiple advanced cancers 1)	601728	PTEN	5728	ENSG00000171862,ENST00000371953;;;ENST00000371953		{Glioma susceptibility 2}	613028	AD	3	Pten
10q23.31	10:87863625-87971930	PTEN, MMAC1, GLM2, CWS1	Phosphatase and tensin homolog (mutated in multiple advanced cancers 1)	601728	PTEN	5728	ENSG00000171862,ENST00000371953;;;ENST00000371953		{Meningioma}	607174	AD	3	Pten
10q23.31	10:87863625-87971930	PTEN, MMAC1, GLM2, CWS1	Phosphatase and tensin homolog (mutated in multiple advanced cancers 1)	601728	PTEN	5728	ENSG00000171862,ENST00000371953;;;ENST00000371953		Cowden syndrome 1	158350	AD	3	Pten
10q23.31	10:87863625-87971930	PTEN, MMAC1, GLM2, CWS1	Phosphatase and tensin homolog (mutated in multiple advanced cancers 1)	601728	PTEN	5728	ENSG00000171862,ENST00000371953;;;ENST00000371953		Lhermitte-Duclos disease	158350	AD	3	Pten
10q23.31	10:87863625-87971930	PTEN, MMAC1, GLM2, CWS1	Phosphatase and tensin homolog (mutated in multiple advanced cancers 1)	601728	PTEN	5728	ENSG00000171862,ENST00000371953;;;ENST00000371953		Macrocephaly/autism syndrome	605309	AD	3	Pten
10q23.31	10:87863625-87971930	PTEN, MMAC1, GLM2, CWS1	Phosphatase and tensin homolog (mutated in multiple advanced cancers 1)	601728	PTEN	5728	ENSG00000171862,ENST00000371953;;;ENST00000371953		Prostate cancer, somatic	176807		3	Pten
10q23.33	10:93591694-93601744	RBP4, RDCCAS, MCOPCB10	Retinol-binding protein-4, interstitial	180250	RBP4	5950	ENSG00000138207,ENST00000371464;;;ENST00000371464	just centromeric of CYP2C cluster	Microphthalmia, isolated, with coloboma 10	616428	AD	3	Rbp4
10q23.33	10:93591694-93601744	RBP4, RDCCAS, MCOPCB10	Retinol-binding protein-4, interstitial	180250	RBP4	5950	ENSG00000138207,ENST00000371464;;;ENST00000371464	just centromeric of CYP2C cluster	Retinal dystrophy, iris coloboma, and comedogenic acne syndrome	615147	AR	3	Rbp4
10q25.3	10:117241114-117279430	SLC18A2, VAT2, SVMT, PKDYS2	Solute carrier family 18 (vesicular monoamine), member 2	193001	SLC18A2	6571	ENSG00000165646,ENST00000644641;;;ENST00000644641		Parkinsonism-dystonia, infantile, 2	618049	AR	3	Slc18a2
10q26.3	10:133527363-133539123	CYP2E, CYP2E1, P450C2E	Cytochrome P450, subfamily IIE, ethanol-inducible	124040	CYP2E1	1571	ENSG00000130649,ENST00000252945;;;ENST00000252945					Cyp2e1
11p	11:1-53400001	HYPLIP2	Hyperlipidemia, combined, 2	604499	HYPLIP2	28515			Hyperlipidemia, combined, 2	604499		2
11p15.5	11:637269-640706	DRD4	Dopamine receptor D4	126452	DRD4	1815	ENSG00000069696,ENST00000176183;;;ENST00000176183	proximal to HRAS	{Attention deficit-hyperactivity disorder}	143465	AD	3	Drd4
11p15.5	11:637269-640706	DRD4	Dopamine receptor D4	126452	DRD4	1815	ENSG00000069696,ENST00000176183;;;ENST00000176183	proximal to HRAS	Autonomic nervous system dysfunction			3	Drd4
11p15.5	11:747464-765012	TALDO1	Transaldolase-1	602063	TALDO1	6888	ENSG00000177156,ENST00000319006;;;ENST00000319006	pseudogene on chr.1	Transaldolase deficiency	606003	AR	3	Taldo1
11p15.4	11:9280654-9314593	TMEM41B, STASIMON	Transmembrane protein 41B	620271	TMEM41B	440026	ENSG00000166471,ENST00000528080;;;ENST00000528080					Tmem41b
11q23.1	11:112143260-112164094	IL18, IGIF	Interleukin-18	600953	IL18	3606	ENSG00000150782,ENST00000280357;;;ENST00000280357					Il18
11q23.2	11:113409605-113475398	DRD2	Dopamine receptor D2	126450	DRD2	1813	ENSG00000149295,ENST00000362072;;;ENST00000362072	11q22-q23 junction; 150kb 5' to NCAM; centromeric to APOA1; telomeric to STMY1				Drd2
12p12.1	12:21797389-21941426	ABCC9, SUR2, CMD1O, ATFB12, CANTU, IDMYS	ATP-binding cassette, subfamily C, member 9 (sulfonylurea receptor 2)	601439	ABCC9	10060	ENSG00000069431,ENST00000261200;;;ENST00000261200	mutation identified in 1 ATFB12 patient	?Atrial fibrillation, familial, 12	614050	AD	3	Abcc9
12p12.1	12:21797389-21941426	ABCC9, SUR2, CMD1O, ATFB12, CANTU, IDMYS	ATP-binding cassette, subfamily C, member 9 (sulfonylurea receptor 2)	601439	ABCC9	10060	ENSG00000069431,ENST00000261200;;;ENST00000261200	mutation identified in 1 ATFB12 patient	Cardiomyopathy, dilated, 1O	608569	AD	3	Abcc9
12p12.1	12:21797389-21941426	ABCC9, SUR2, CMD1O, ATFB12, CANTU, IDMYS	ATP-binding cassette, subfamily C, member 9 (sulfonylurea receptor 2)	601439	ABCC9	10060	ENSG00000069431,ENST00000261200;;;ENST00000261200	mutation identified in 1 ATFB12 patient	Hypertrichotic osteochondrodysplasia (Cantu syndrome)	239850	AD	3	Abcc9
12p12.1	12:21797389-21941426	ABCC9, SUR2, CMD1O, ATFB12, CANTU, IDMYS	ATP-binding cassette, subfamily C, member 9 (sulfonylurea receptor 2)	601439	ABCC9	10060	ENSG00000069431,ENST00000261200;;;ENST00000261200	mutation identified in 1 ATFB12 patient	Intellectual disability and myopathy syndrome	619719	AR	3	Abcc9
12q13.12	12:50104008-50111313	GPD1, HTGTI	Glycerol-3-phosphate dehydrogenase, soluble	138420	GPD1	2819	ENSG00000167588,ENST00000301149;;;ENST00000301149		Hypertriglyceridemia, transient infantile	614480	AR	3	Gpd1
12q24.12	12:111766933-111817532	ALDH2	Aldehyde dehydrogenase 2 family, mitochondrial	100650	ALDH2	217	ENSG00000111275,ENST00000261733;;;ENST00000261733		{Esophageal cancer, alcohol-related, susceptibility to}			3	Aldh2
12q24.12	12:111766933-111817532	ALDH2	Aldehyde dehydrogenase 2 family, mitochondrial	100650	ALDH2	217	ENSG00000111275,ENST00000261733;;;ENST00000261733		{Hangover, susceptibility to}	610251	AD	3	Aldh2
12q24.12	12:111766933-111817532	ALDH2	Aldehyde dehydrogenase 2 family, mitochondrial	100650	ALDH2	217	ENSG00000111275,ENST00000261733;;;ENST00000261733		{Sublingual nitroglycerin, susceptibility to poor response to}			3	Aldh2
12q24.12	12:111766933-111817532	ALDH2	Aldehyde dehydrogenase 2 family, mitochondrial	100650	ALDH2	217	ENSG00000111275,ENST00000261733;;;ENST00000261733		Alcohol sensitivity, acute	610251	AD	3	Aldh2
12q24.31	12:123584552-123598582	TMED2	Transmembrane p24 trafficking protein 2	619642	TMED2	10959	ENSG00000086598,ENST00000262225;;;ENST00000262225					Tmed2
13q22-q32	13:72800001-101100000	PAND1	Panic disorder syndrome 1	167870	PAND1	387572			Panic disorder syndrome 1	167870	?AD	2
14q32.13	14:94376747-94390635	SERPINA1, PI, AAT	Alpha-1-antitrypsin (serpin peptidase inhibitor, clade A, member 1)	107400	SERPINA1	5265	ENSG00000197249,ENST00000393087;;;ENST00000393087		Emphysema due to AAT deficiency	613490	AR	3	Serpina1a,Serpina1b,Serpina1c,Serpina1d,Serpina1e
14q32.13	14:94376747-94390635	SERPINA1, PI, AAT	Alpha-1-antitrypsin (serpin peptidase inhibitor, clade A, member 1)	107400	SERPINA1	5265	ENSG00000197249,ENST00000393087;;;ENST00000393087		Emphysema-cirrhosis, due to AAT deficiency	613490	AR	3	Serpina1a,Serpina1b,Serpina1c,Serpina1d,Serpina1e
14q32.13	14:94376747-94390635	SERPINA1, PI, AAT	Alpha-1-antitrypsin (serpin peptidase inhibitor, clade A, member 1)	107400	SERPINA1	5265	ENSG00000197249,ENST00000393087;;;ENST00000393087		Hemorrhagic diathesis due to antithrombin Pittsburgh	613490	AR	3	Serpina1a,Serpina1b,Serpina1c,Serpina1d,Serpina1e
15q13.1	15:29699367-29969049	TJP1	Tight junction protein 1 (zona occludens 1)	601009	TJP1	7082	ENSG00000104067,ENST00000614355;;;ENST00000614355					Tjp1
15q14	15:34341719-34343136	NOP10, NOLA3, DKCB1, PFBMFT9, CHINE2	NOP10 ribonucleoprotein	606471	NOP10	55505	ENSG00000182117,ENST00000328848;;;ENST00000328848	mutation identified in 1 PFBMFT9 family and 1 DKCB1 family and 1 CHINE2 family	?Cataracts, hearing impairment, nephrotic syndrome, and enterocolitis 2	620425	AR	3	Nop10
15q14	15:34341719-34343136	NOP10, NOLA3, DKCB1, PFBMFT9, CHINE2	NOP10 ribonucleoprotein	606471	NOP10	55505	ENSG00000182117,ENST00000328848;;;ENST00000328848	mutation identified in 1 PFBMFT9 family and 1 DKCB1 family and 1 CHINE2 family	?Dyskeratosis congenita, autosomal recessive 1	224230	AR	3	Nop10
15q14	15:34341719-34343136	NOP10, NOLA3, DKCB1, PFBMFT9, CHINE2	NOP10 ribonucleoprotein	606471	NOP10	55505	ENSG00000182117,ENST00000328848;;;ENST00000328848	mutation identified in 1 PFBMFT9 family and 1 DKCB1 family and 1 CHINE2 family	?Pulmonary fibrosis and/or bone marrow failure syndrome, telomere-related, 9	620400	AD	3	Nop10
15q21.2	15:51208057-51338596	CYP19A1, CYP19, ARO	Cytochrome P450, family 19, subfamily A, polypeptide 1 (aromatization of androgens)	107910	CYP19A1	1588	ENSG00000137869,ENST00000396402;;;ENST00000396402	close to CYP11 in mouse	Aromatase deficiency	613546		3	Cyp19a1
15q21.2	15:51208057-51338596	CYP19A1, CYP19, ARO	Cytochrome P450, family 19, subfamily A, polypeptide 1 (aromatization of androgens)	107910	CYP19A1	1588	ENSG00000137869,ENST00000396402;;;ENST00000396402	close to CYP11 in mouse	Aromatase excess syndrome	139300	AD	3	Cyp19a1
16p13.3	16:287440-352723	AXIN1, AXIN, CMDOH	Axis inhibitor 1	603816	AXIN1	8312	ENSG00000103126,ENST00000262320;;;ENST00000262320	hypermethylation of AXIN1 promoter seen in 1 CDUP patient	?Caudal duplication anomaly	607864		3	Axin1
16p13.3	16:287440-352723	AXIN1, AXIN, CMDOH	Axis inhibitor 1	603816	AXIN1	8312	ENSG00000103126,ENST00000262320;;;ENST00000262320	hypermethylation of AXIN1 promoter seen in 1 CDUP patient	Craniometadiaphyseal osteosclerosis with hip dysplasia	620558	AR	3	Axin1
16p13.3	16:287440-352723	AXIN1, AXIN, CMDOH	Axis inhibitor 1	603816	AXIN1	8312	ENSG00000103126,ENST00000262320;;;ENST00000262320	hypermethylation of AXIN1 promoter seen in 1 CDUP patient	Hepatocellular carcinoma, somatic	114550		3	Axin1
17p13.3	17:2050271-2050380	MIR212, MIRN212	Micro RNA 212	613487	MIR212	406994	ENSG00000267195,ENST00000586026					Mir212
17p13.1	17:7668421-7687490	TP53, P53, LFS1 , BCC7, BMFS5	Tumor protein p53	191170	TP53	7157	ENSG00000141510,ENST00000269305;;;ENST00000269305		{Adrenocortical carcinoma, pediatric}	202300	AD	3	Trp53
17p13.1	17:7668421-7687490	TP53, P53, LFS1 , BCC7, BMFS5	Tumor protein p53	191170	TP53	7157	ENSG00000141510,ENST00000269305;;;ENST00000269305		{Basal cell carcinoma 7}	614740	AD	3	Trp53
17p13.1	17:7668421-7687490	TP53, P53, LFS1 , BCC7, BMFS5	Tumor protein p53	191170	TP53	7157	ENSG00000141510,ENST00000269305;;;ENST00000269305		{Choroid plexus papilloma}	260500	AD	3	Trp53
17p13.1	17:7668421-7687490	TP53, P53, LFS1 , BCC7, BMFS5	Tumor protein p53	191170	TP53	7157	ENSG00000141510,ENST00000269305;;;ENST00000269305		{Colorectal cancer}	114500	AD, SMu	3	Trp53
17p13.1	17:7668421-7687490	TP53, P53, LFS1 , BCC7, BMFS5	Tumor protein p53	191170	TP53	7157	ENSG00000141510,ENST00000269305;;;ENST00000269305		{Glioma susceptibility 1}	137800	AD, SMu	3	Trp53
17p13.1	17:7668421-7687490	TP53, P53, LFS1 , BCC7, BMFS5	Tumor protein p53	191170	TP53	7157	ENSG00000141510,ENST00000269305;;;ENST00000269305		{Osteosarcoma}	259500	SMu	3	Trp53
17p13.1	17:7668421-7687490	TP53, P53, LFS1 , BCC7, BMFS5	Tumor protein p53	191170	TP53	7157	ENSG00000141510,ENST00000269305;;;ENST00000269305		Bone marrow failure syndrome 5	618165	AD	3	Trp53
17p13.1	17:7668421-7687490	TP53, P53, LFS1 , BCC7, BMFS5	Tumor protein p53	191170	TP53	7157	ENSG00000141510,ENST00000269305;;;ENST00000269305		Breast cancer, somatic	114480		3	Trp53
17p13.1	17:7668421-7687490	TP53, P53, LFS1 , BCC7, BMFS5	Tumor protein p53	191170	TP53	7157	ENSG00000141510,ENST00000269305;;;ENST00000269305		Hepatocellular carcinoma, somatic	114550		3	Trp53
17p13.1	17:7668421-7687490	TP53, P53, LFS1 , BCC7, BMFS5	Tumor protein p53	191170	TP53	7157	ENSG00000141510,ENST00000269305;;;ENST00000269305		Li-Fraumeni syndrome	151623	AD	3	Trp53
17p13.1	17:7668421-7687490	TP53, P53, LFS1 , BCC7, BMFS5	Tumor protein p53	191170	TP53	7157	ENSG00000141510,ENST00000269305;;;ENST00000269305		Nasopharyngeal carcinoma, somatic	607107		3	Trp53
17p13.1	17:7668421-7687490	TP53, P53, LFS1 , BCC7, BMFS5	Tumor protein p53	191170	TP53	7157	ENSG00000141510,ENST00000269305;;;ENST00000269305		Pancreatic cancer, somatic	260350		3	Trp53
17p11.2	17:16380779-16382745	UBB	Ubiquitin B	191339	UBB	7314	ENSG00000170315,ENST00000302182;;;ENST00000302182					Ubb
17p11.2	17:17212212-17237330	FLCN, BHD	Folliculin	607273	FLCN	201163	ENSG00000154803,ENST00000285071;;;ENST00000285071		Birt-Hogg-Dube syndrome	135150	AD	3	Flcn
17p11.2	17:17212212-17237330	FLCN, BHD	Folliculin	607273	FLCN	201163	ENSG00000154803,ENST00000285071;;;ENST00000285071		Colorectal cancer, somatic	114500		3	Flcn
17p11.2	17:17212212-17237330	FLCN, BHD	Folliculin	607273	FLCN	201163	ENSG00000154803,ENST00000285071;;;ENST00000285071		Pneumothorax, primary spontaneous	173600	AD	3	Flcn
17p11.2	17:17212212-17237330	FLCN, BHD	Folliculin	607273	FLCN	201163	ENSG00000154803,ENST00000285071;;;ENST00000285071		Renal carcinoma, chromophobe, somatic	144700		3	Flcn
17q11.2	17:30194319-30235697	SLC6A4, HTT, OCD1	Solute carrier family 6 (neurotransmitter transporter, serotonin), member 4	182138	SLC6A4	6532	ENSG00000108576,ENST00000650711;;;ENST00000650711		{Anxiety-related personality traits}	607834		3	Slc6a4
17q11.2	17:30194319-30235697	SLC6A4, HTT, OCD1	Solute carrier family 6 (neurotransmitter transporter, serotonin), member 4	182138	SLC6A4	6532	ENSG00000108576,ENST00000650711;;;ENST00000650711		{Obsessive-compulsive disorder}	164230	AD	3	Slc6a4
17q21.32	17:48048359-48061545	NFE2L1, NRF1	Nuclear factor, erythroid-derived 2-like 1	163260	NFE2L1	4779	ENSG00000082641,ENST00000362042;;;ENST00000362042					Nfe2l1
17q25.1	17:76527356-76551193	CYGB, HGB, STAP	Cytoglobin	608759	CYGB	114757	ENSG00000161544,ENST00000293230;;;ENST00000293230					Cygb
19p13.3	19:2428166-2456959	LMNB2, LMN2, EPM9, MCPH27	Lamin B2	150341	LMNB2	84823	ENSG00000176619,ENST00000325327;;;ENST00000325327	mutation identified in 1 EPM9 family	?Epilepsy, progressive myoclonic, 9	616540	AR	3	Lmnb2
19p13.3	19:2428166-2456959	LMNB2, LMN2, EPM9, MCPH27	Lamin B2	150341	LMNB2	84823	ENSG00000176619,ENST00000325327;;;ENST00000325327	mutation identified in 1 EPM9 family	{Lipodystrophy, partial, acquired, susceptibility to}	608709	AD	3	Lmnb2
19p13.3	19:2428166-2456959	LMNB2, LMN2, EPM9, MCPH27	Lamin B2	150341	LMNB2	84823	ENSG00000176619,ENST00000325327;;;ENST00000325327	mutation identified in 1 EPM9 family	Microcephaly 27, primary, autosomal dominant	619180	AD	3	Lmnb2
19q13.2	19:39825350-39834162	DYRK1B, MIRK, AOMS3	Dual-specificity tyrosine phosphorylation-regulated kinase 1B	604556	DYRK1B	9149	ENSG00000105204,ENST00000323039;;;ENST00000323039		Abdominal obesity-metabolic syndrome 3	615812	AD	3	Dyrk1b
19q13.2	19:40843541-40850447	CYP2A6, CYP2A3, CYP2A, P450C2A	Cytochrome P450, subfamily IIA, phenobarbital-inducible, polypeptide 6	122720	CYP2A6	1548	ENSG00000255974,ENST00000301141;;;ENST00000301141		{Lung cancer, resistance to}	211980	AD, SMu	3	Cyp2a4,Cyp2a5
19q13.2	19:40843541-40850447	CYP2A6, CYP2A3, CYP2A, P450C2A	Cytochrome P450, subfamily IIA, phenobarbital-inducible, polypeptide 6	122720	CYP2A6	1548	ENSG00000255974,ENST00000301141;;;ENST00000301141		{Nicotine addiction, protection from}	188890		3	Cyp2a4,Cyp2a5
19q13.2	19:40843541-40850447	CYP2A6, CYP2A3, CYP2A, P450C2A	Cytochrome P450, subfamily IIA, phenobarbital-inducible, polypeptide 6	122720	CYP2A6	1548	ENSG00000255974,ENST00000301141;;;ENST00000301141		Coumarin resistance	122700	AD	3	Cyp2a4,Cyp2a5
19q13.33	19:48795064-48811029	BCAT2, BCT2, HVLI, BCAT2	Branched chain aminotransferase-2, mitochondrial	113530	BCAT2	587	ENSG00000105552,ENST00000316273;;;ENST00000316273		Hypervalinemia and hyperleucine-isoleucinemia	618850	AR	3	Bcat2
19q13.43	19:58498333-58511992	SLC27A5, FATP5, VLACSR, VLCSH2	Solute carrier family 27 (fatty acid transporter), member 5	603314	SLC27A5	10998	ENSG00000083807,ENST00000263093;;;ENST00000263093					Slc27a5
20p12.3	20:6767686-6780246	BMP2, BMP2A, BDA2, SSFSC1	Bone morphogenetic protein-2	112261	BMP2	650	ENSG00000125845,ENST00000378827;;;ENST00000378827		{HFE hemochromatosis, modifier of}	235200	AR	3	Bmp2
20p12.3	20:6767686-6780246	BMP2, BMP2A, BDA2, SSFSC1	Bone morphogenetic protein-2	112261	BMP2	650	ENSG00000125845,ENST00000378827;;;ENST00000378827		Brachydactyly, type A2	112600	AD	3	Bmp2
20p12.3	20:6767686-6780246	BMP2, BMP2A, BDA2, SSFSC1	Bone morphogenetic protein-2	112261	BMP2	650	ENSG00000125845,ENST00000378827;;;ENST00000378827		Short stature, facial dysmorphism, and skeletal anomalies with or without cardiac anomalies 1	617877	AD	3	Bmp2
20q13.33	20:63343223-63361349	CHRNA4, ENFL1	Cholinergic receptor, nicotinic, alpha polypeptide-4	118504	CHRNA4	1137	ENSG00000101204,ENST00000370263;;;ENST00000370263		{Nicotine addiction, susceptibility to}	188890		3	Chrna4
20q13.33	20:63343223-63361349	CHRNA4, ENFL1	Cholinergic receptor, nicotinic, alpha polypeptide-4	118504	CHRNA4	1137	ENSG00000101204,ENST00000370263;;;ENST00000370263		Epilepsy, nocturnal frontal lobe, 1	600513	AD	3	Chrna4
22q11.21	22:19941772-19969975	COMT	Catechol-O-methyltransferase	116790	COMT	1312	ENSG00000093010,ENST00000361682;;;ENST00000361682		{Panic disorder, susceptibility to}	167870	?AD	3	Comt
22q11.21	22:19941772-19969975	COMT	Catechol-O-methyltransferase	116790	COMT	1312	ENSG00000093010,ENST00000361682;;;ENST00000361682		{Schizophrenia, susceptibility to}	181500	AD	3	Comt
22q13	22:37200001-50818468	FLD1, NAFLD1	Fatty liver disease, susceptibility to, 1	613282	NAFLD1	100380876		associated with rs738409	{Fatty liver disease, susceptibility to, 1}	613282	Mu	2
22q13.31	22:43923805-43947582	PNPLA3, ADPN	Patatin-like phospholipase domain-containing protein 3	609567	PNPLA3	80339	ENSG00000100344,ENST00000216180;;;ENST00000216180					Pnpla3
Phenotype Mapping Key
1 - The disorder is placed on the map due to its association with a gene, but the underlying defect is not known.
2 - The disorder was placed on the map by statistical methods.
3 - The molecular basis of the disorder is known.
4 - A contiguous gene duplication or deletion syndrome in which multiple genes are involved.
Inheritance Abbreviations
?AD	?Autosomal dominant
?XLR	?X-linked recessive
AD	Autosomal dominant
AR	Autosomal recessive
PD	Pseudoautosomal dominant
PR	Pseudoautosomal recessive
DD	Digenic dominant
DR	Digenic recessive
ICB	Inherited chromosomal imbalance
IC	Isolated cases
Mi	Mitochondrial
Mu	Multifactorial
SMo	Somatic mosaicism
SMu	Somatic mutation
XL	X-linked
XLD	X-linked dominant
XLR	X-linked recessive
YL	Y-linked
